# Supplementary material
Source: MDPI journal article supplement (https://www.mdpi.com/2073-4344/11/5/552)
Supplement: s1 [file s1]

# Amide-type substrates in the synthesis of *N*-protected 1-aminomethylphosphonium salts

Dominika Kozicka <sup>1</sup>, Paulina Zieleźny <sup>1</sup>, Karol Erfurt <sup>2</sup> and Jakub Adamek <sup>1,3,\*</sup>

<sup>1</sup>Department of Organic Chemistry, Bioorganic Chemistry and Biotechnology, Silesian University of Technology, B. Krzywoustego 4, 44-100 Gliwice, Poland; paulzie224@gmail.com, dominikakozicka@o2.pl, jakub.adamek@polsl.pl

<sup>2</sup>Department of Chemical Organic Technology and Petrochemistry, Silesian University of Technology, B. Krzywoustego 4, 44-100 Gliwice, Poland; karol.erfurt@polsl.pl

<sup>3</sup>Biotechnology Center of Silesian University of Technology, B. Krzywoustego 8, 44-100 Gliwice, Poland; jakub.adamek@polsl.pl.

\*Correspondence: jakub.adamek@polsl.pl; Tel.: +48 032-237-1080; fax: +48 032-237-2094

## Supporting information

### Experimental and analytical data

#### Table of contents

|                                                                                                                                                                              |          |
|------------------------------------------------------------------------------------------------------------------------------------------------------------------------------|----------|
| 1. Apparatus for the synthesis of <i>N</i> -protected aminomethylphosphonium salts <b>2</b> .....                                                                            | S2       |
| 2. <sup>1</sup> H NMR, <sup>13</sup> C{ <sup>1</sup> H} NMR, <sup>31</sup> P{ <sup>1</sup> H} NMR spectra of <i>N</i> -protected aminomethylphosphonium salts <b>2</b> ..... | S3-S68   |
| 3. IR spectra of compounds of <i>N</i> -protected aminomethylphosphonium salts <b>2</b> .....                                                                                | S69-S91  |
| 4. MS spectra of unknown compounds .....                                                                                                                                     | S92-S103 |

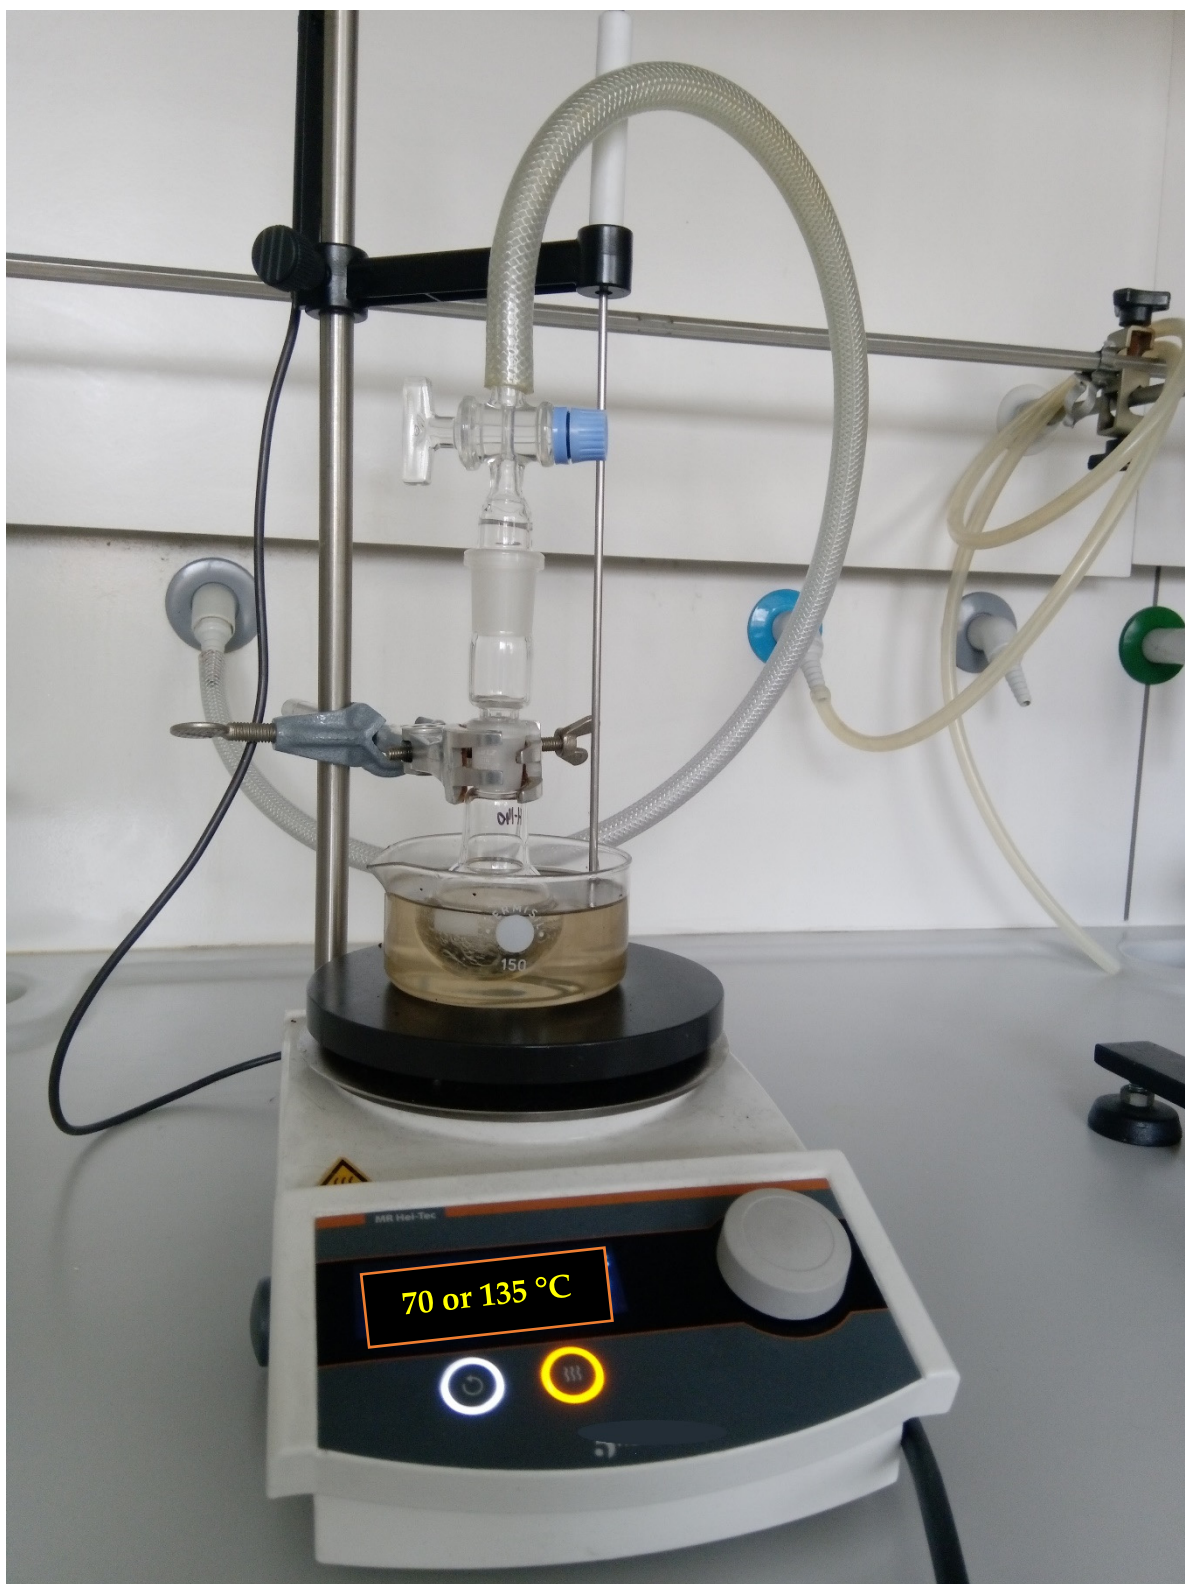

**Photo S1.** Apparatus for the synthesis of *N*-protected aminomethylphosphonium salts **2**. (Personal photo made by dr. J. Adamek).

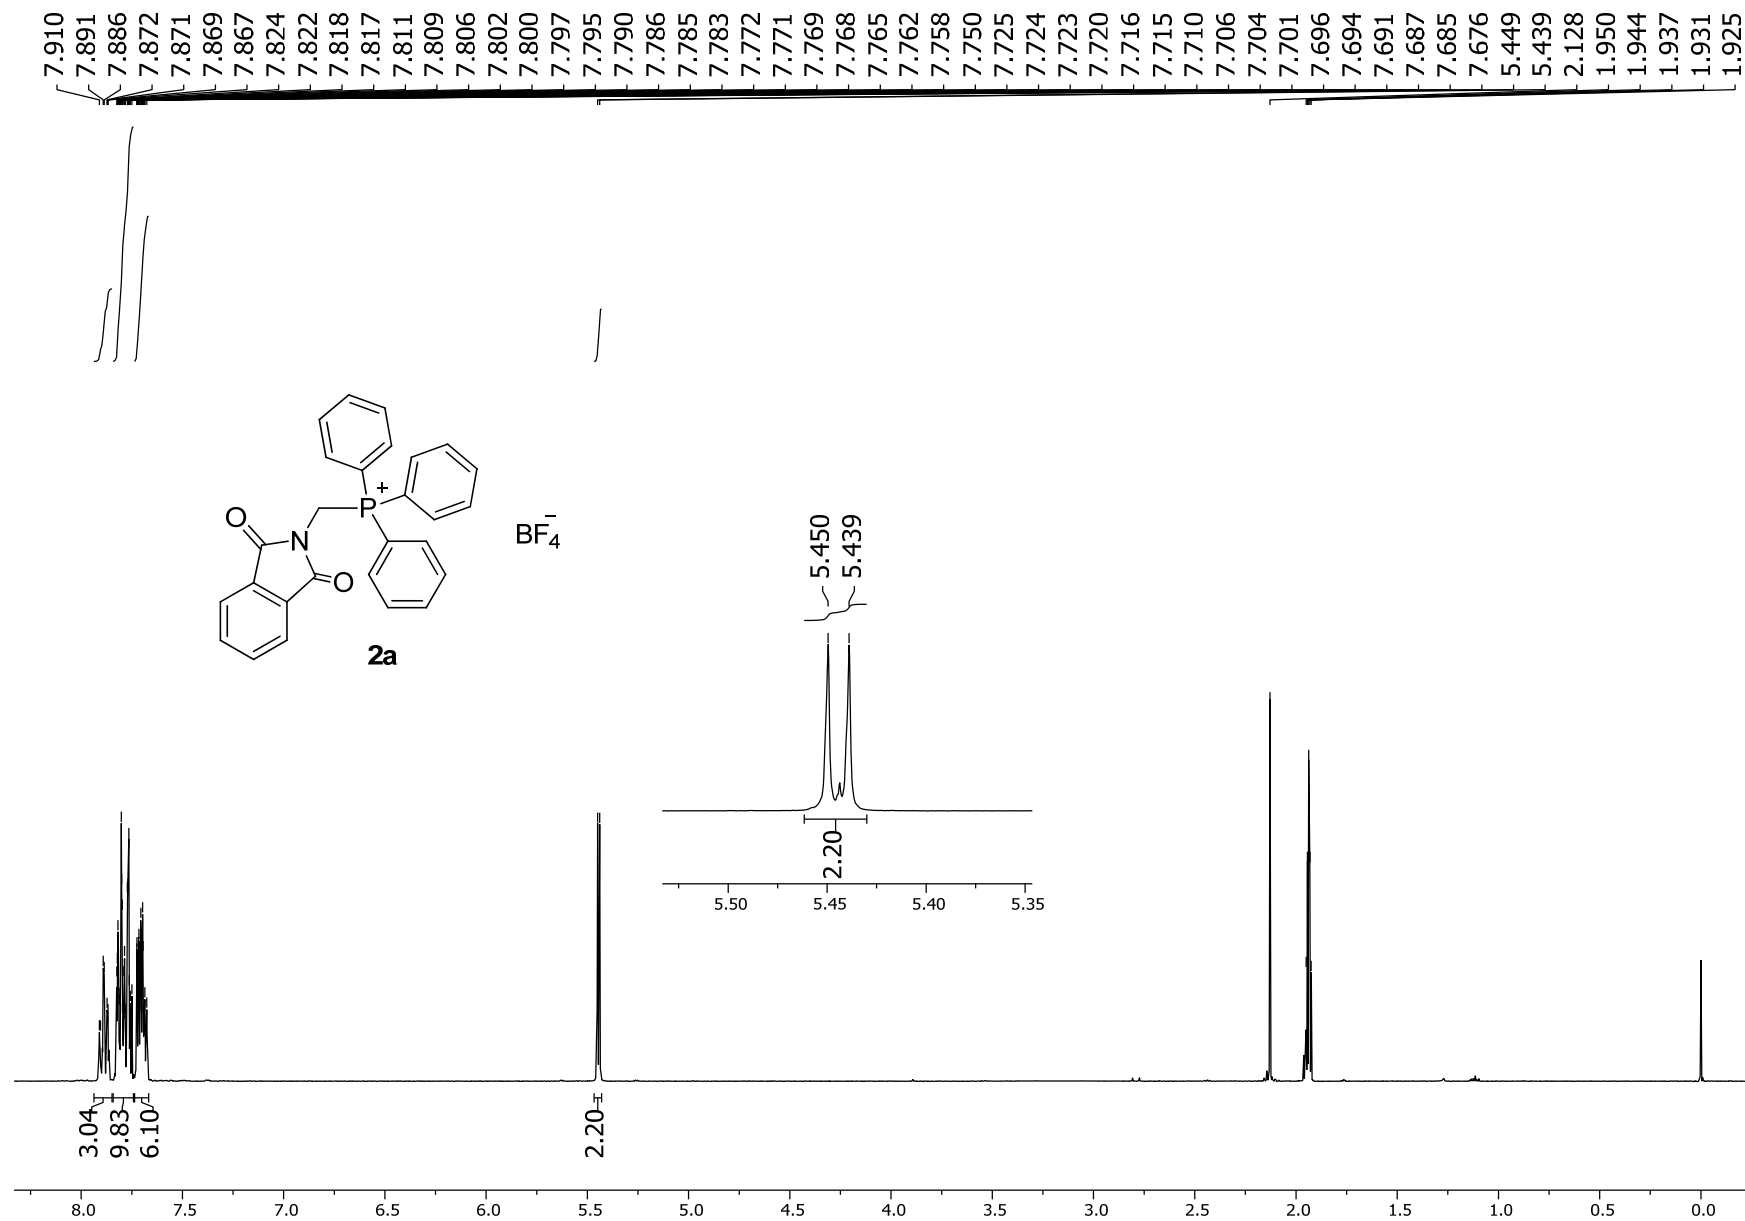

<sup>1</sup>H NMR spectrum of 1-(N-phthalimido)methyltriphenylphosphonium tetrafluoroborate (**2a**); 400 MHz/CD<sub>3</sub>CN/TMS; δ (ppm).

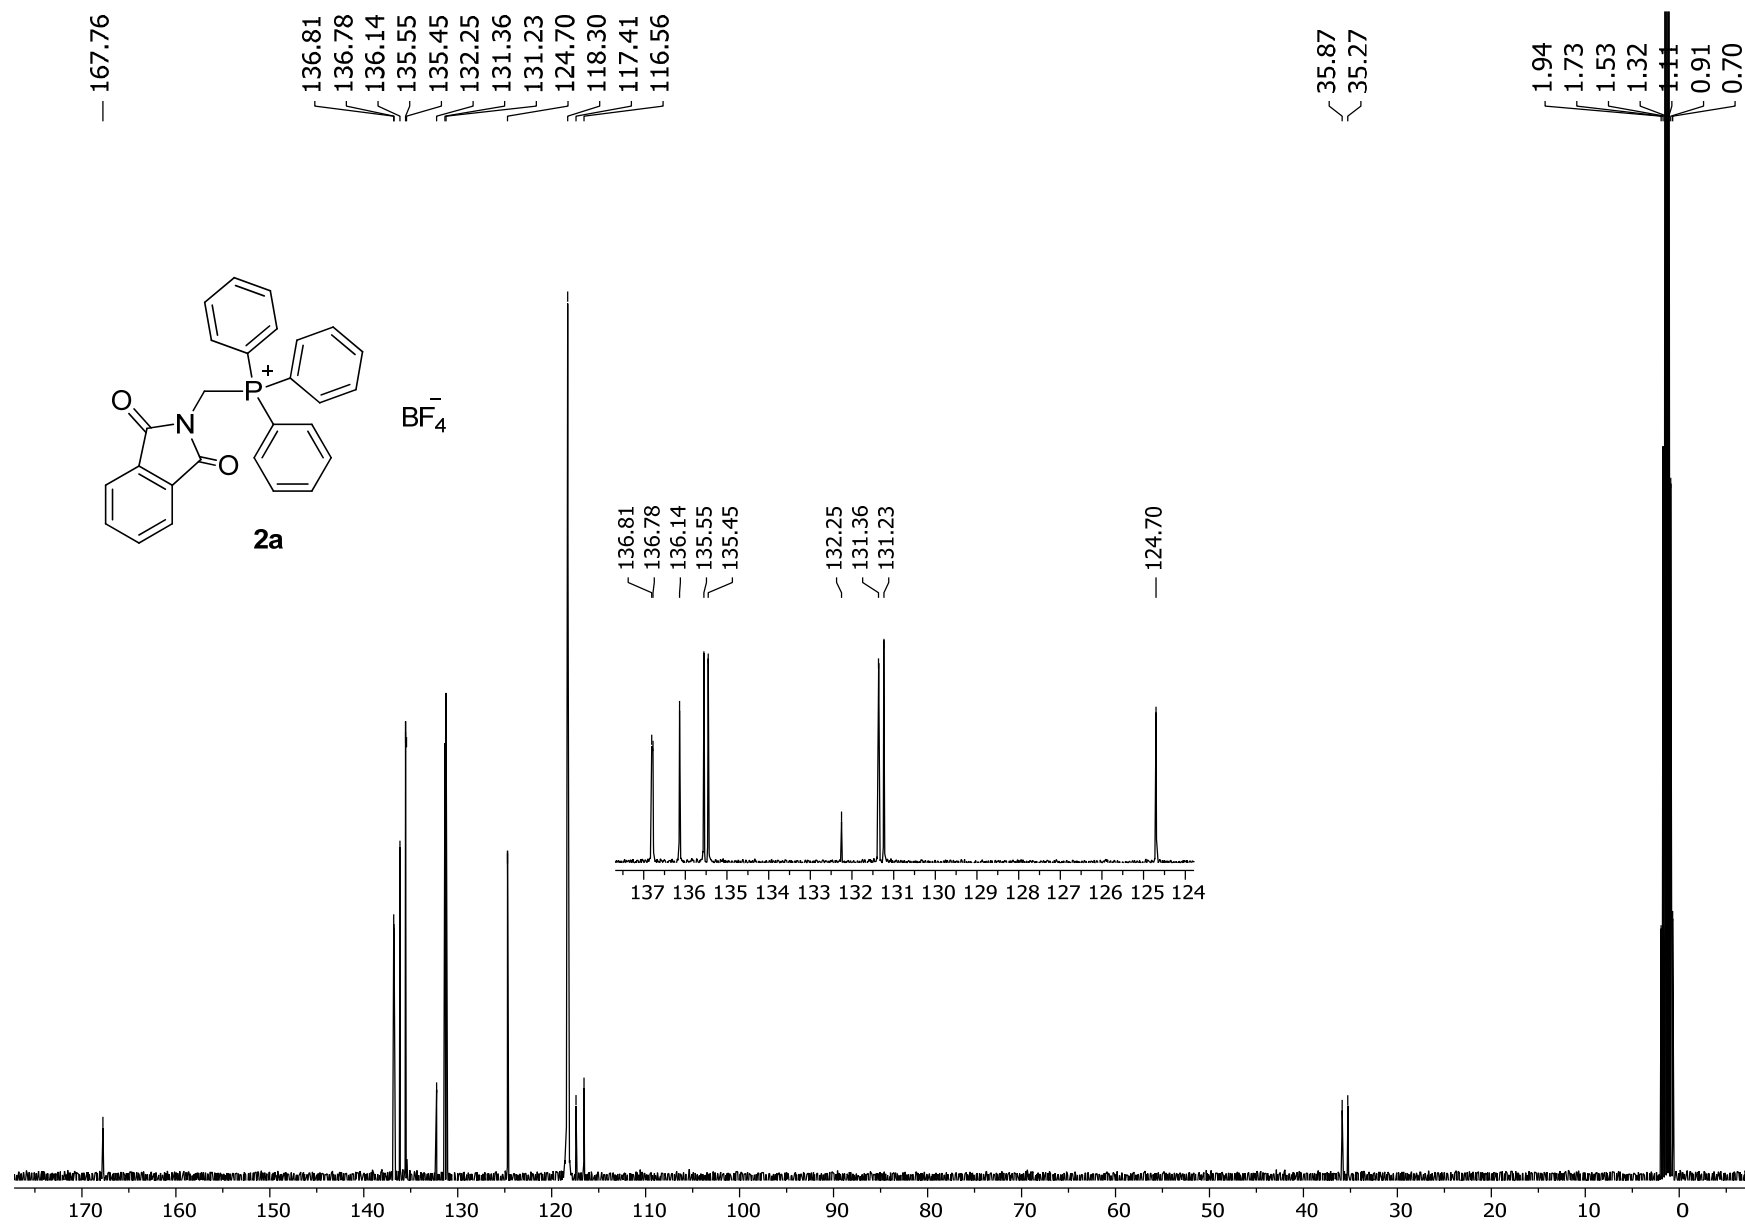

<sup>13</sup>C{<sup>1</sup>H} NMR spectrum of 1-(N-phthalimido)methyltriphenylphosphonium tetrafluoroborate (**2a**); 100 MHz/CD<sub>3</sub>CN/TMS; δ (ppm).



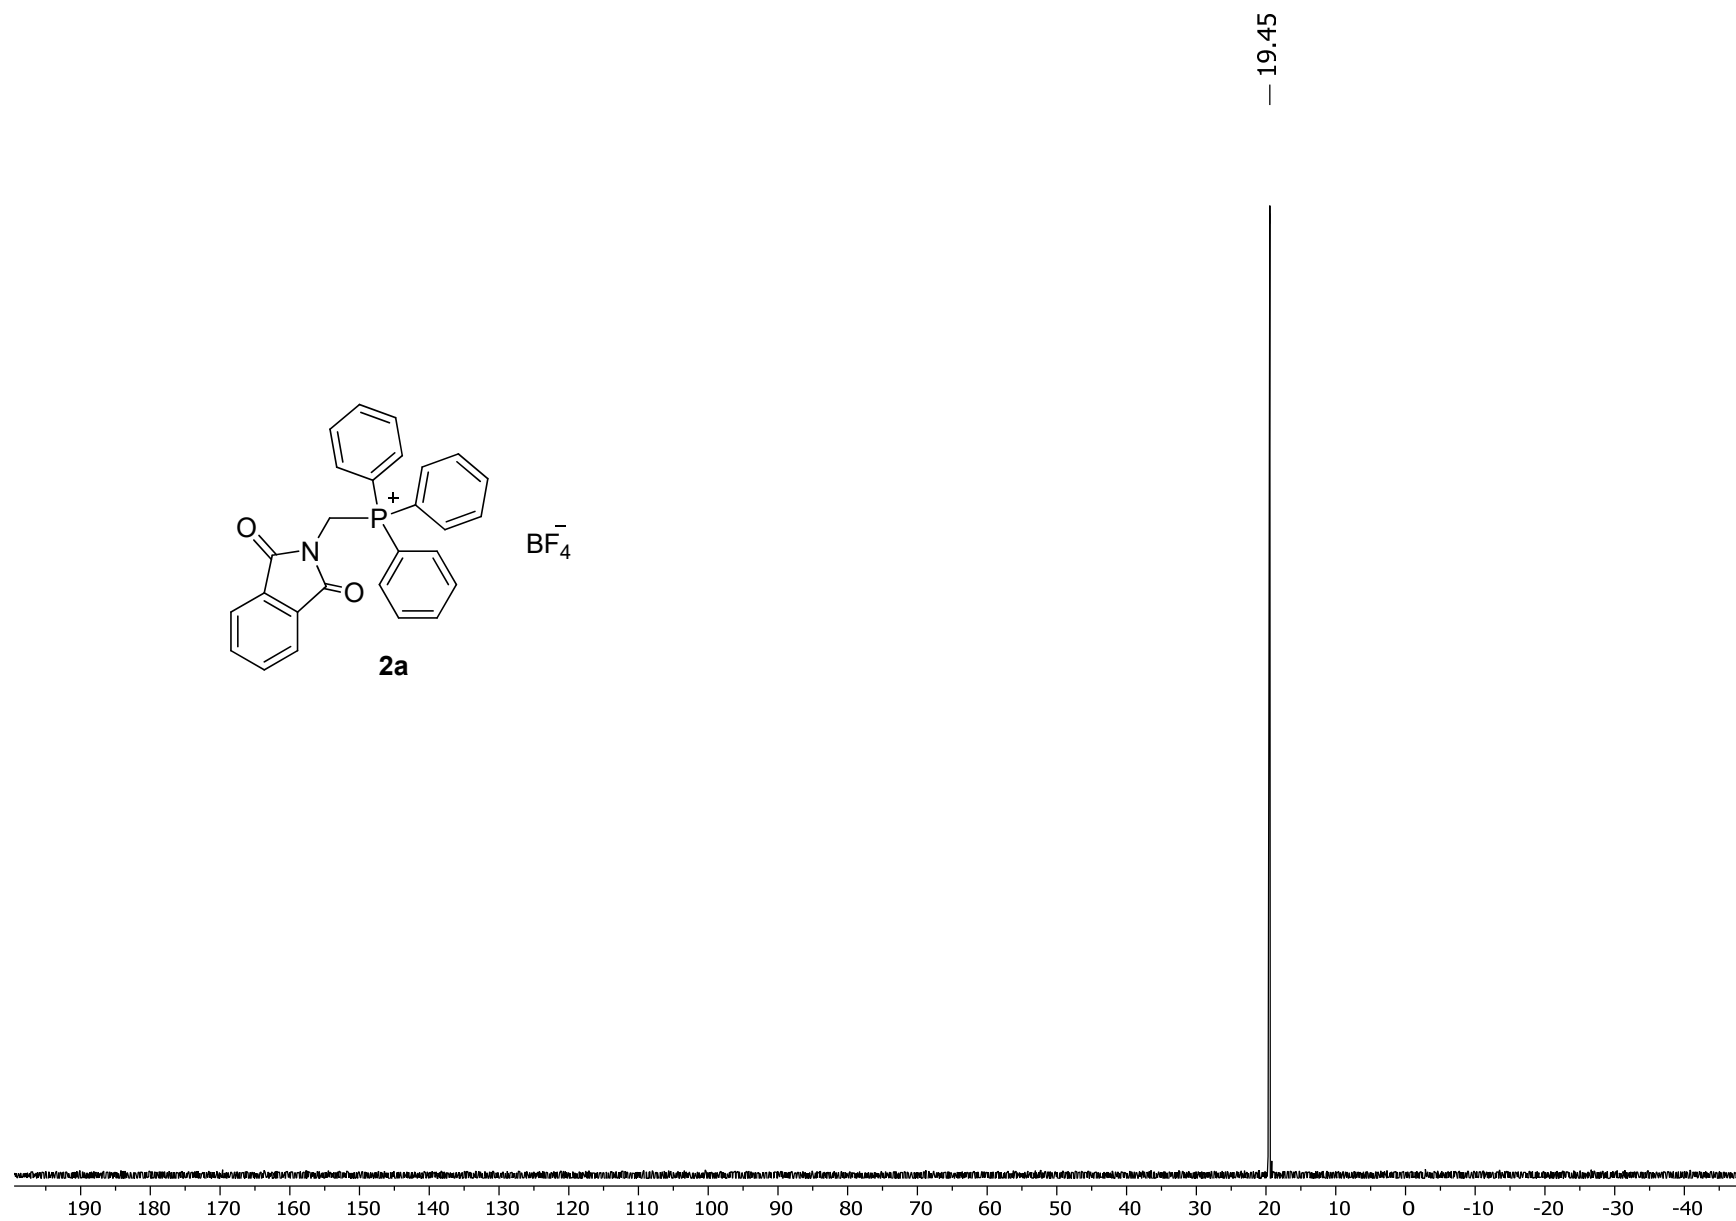

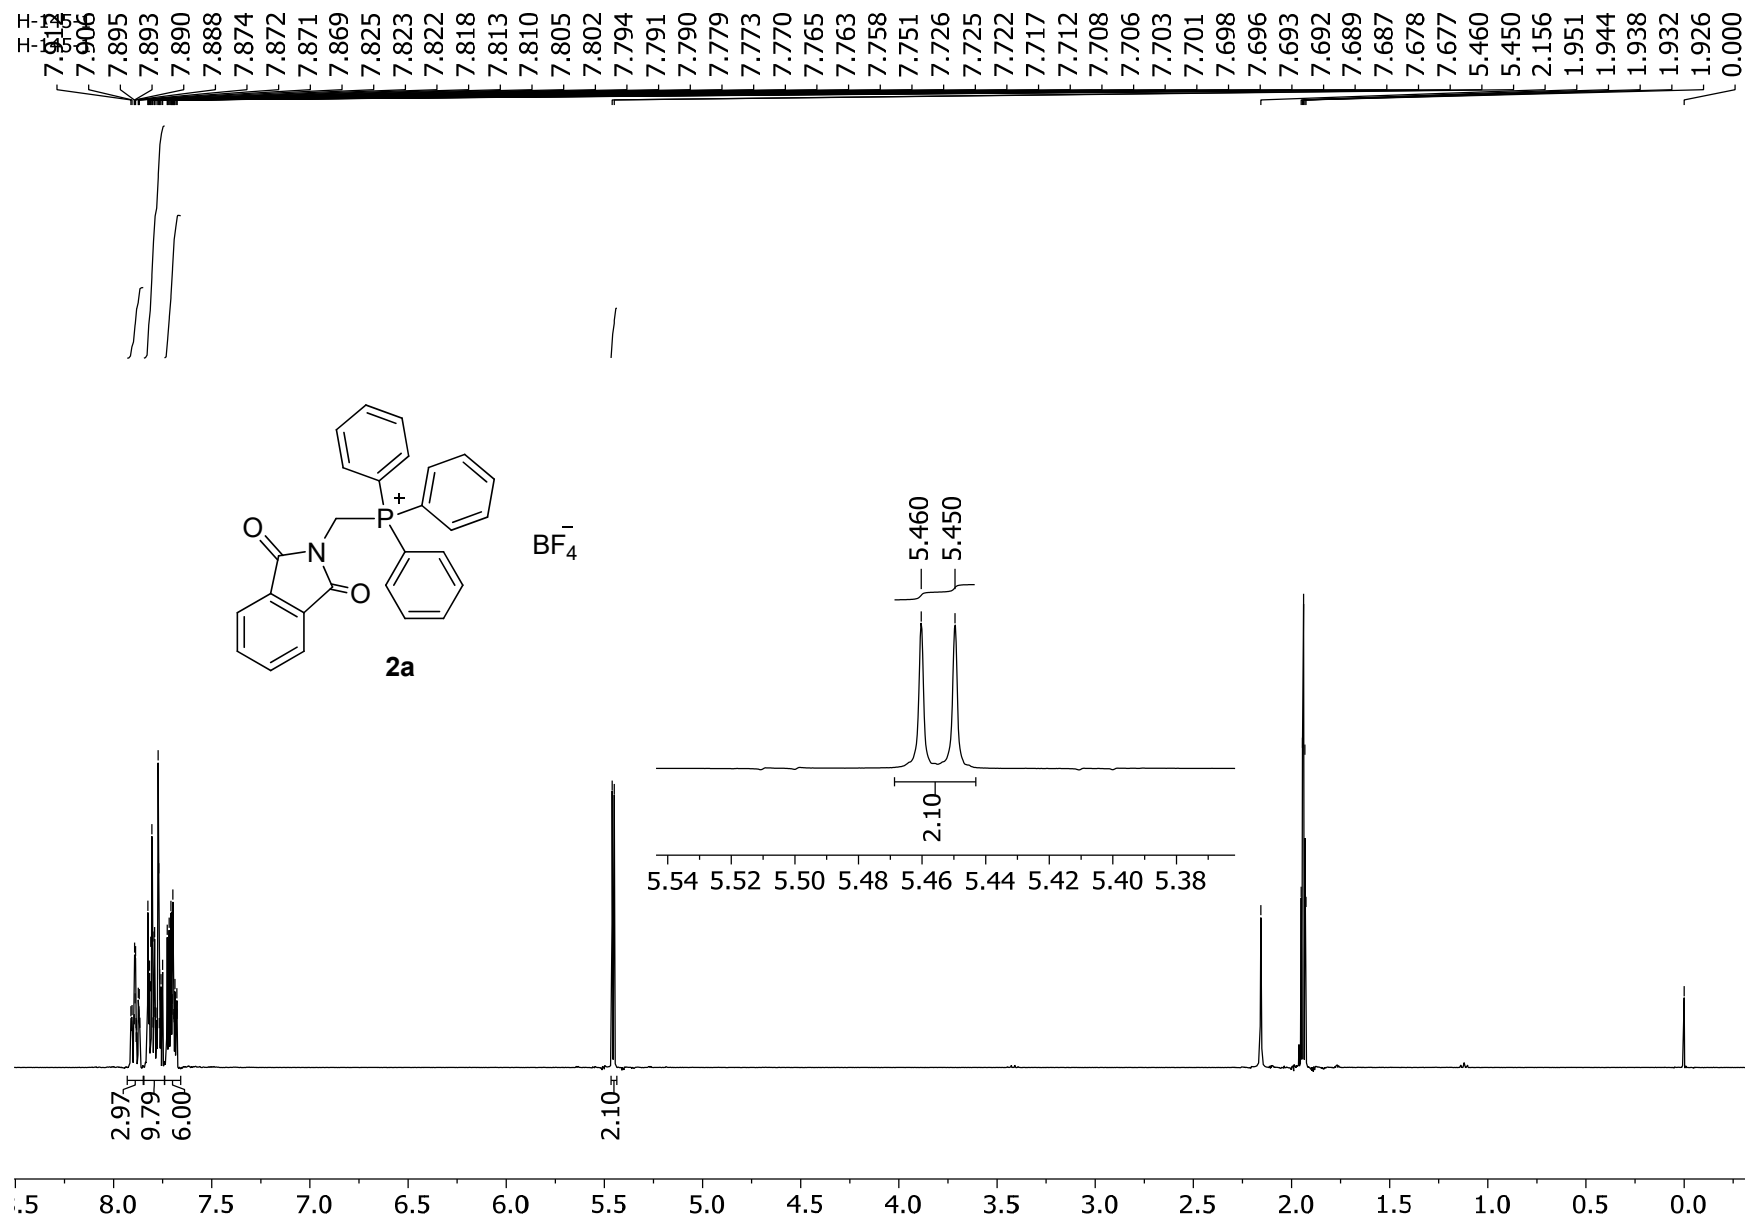

<sup>1</sup>H NMR spectrum of 1-(*N*-phthalimido)methyltriphenylphosphonium tetrafluoroborate (**2a**) 5g-scale; 400 MHz/CD<sub>3</sub>CN/TMS; δ (ppm).

H-145-1-31P  
H-143-3-31P

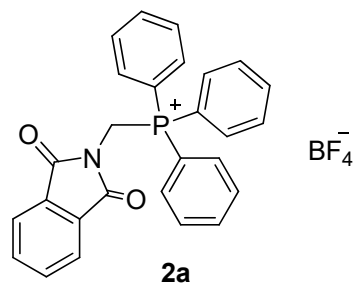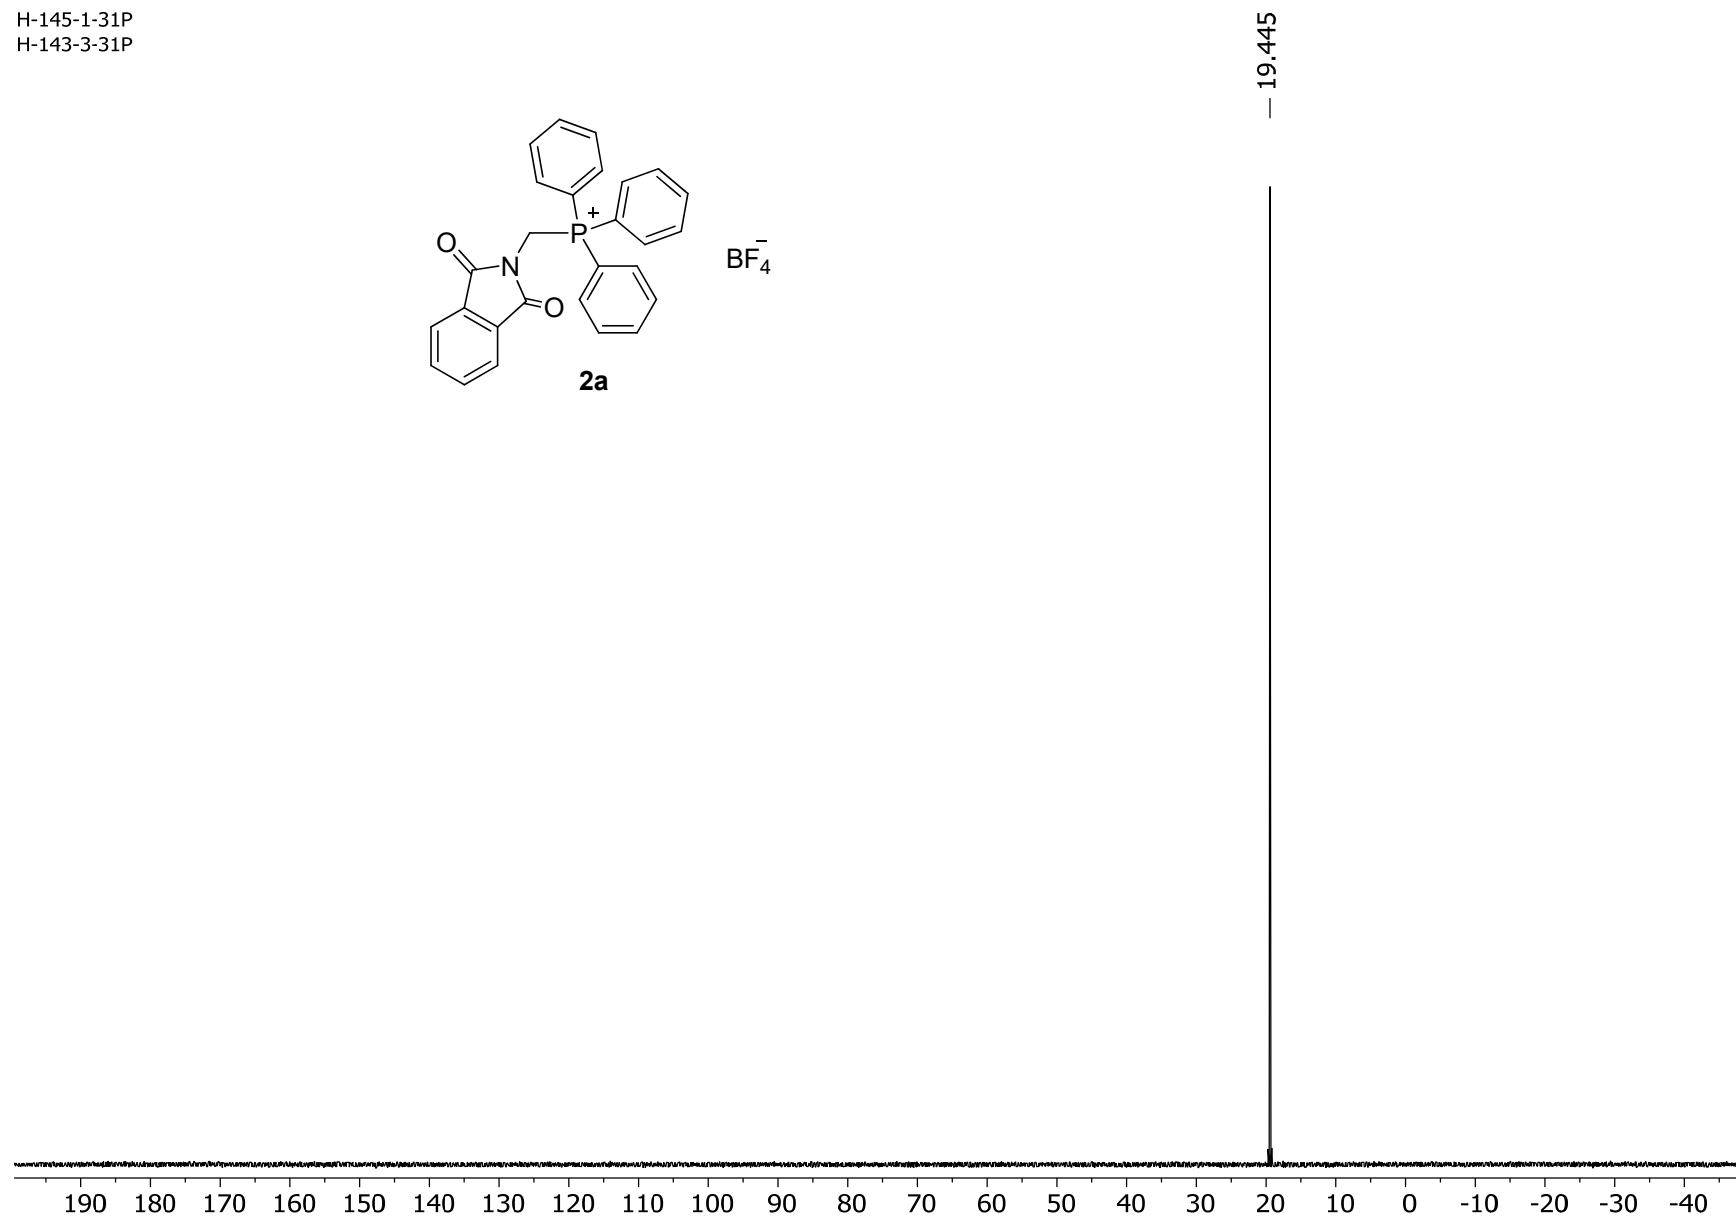

$^{31}\text{P}\{^1\text{H}\}$  NMR spectrum of 1-(*N*-phthalimido)methyltriphenylphosphonium tetrafluoroborate (**2a**) 5g-scale; 161.9 MHz/ $\text{CD}_3\text{CN}$ ;  $\delta$  (ppm).

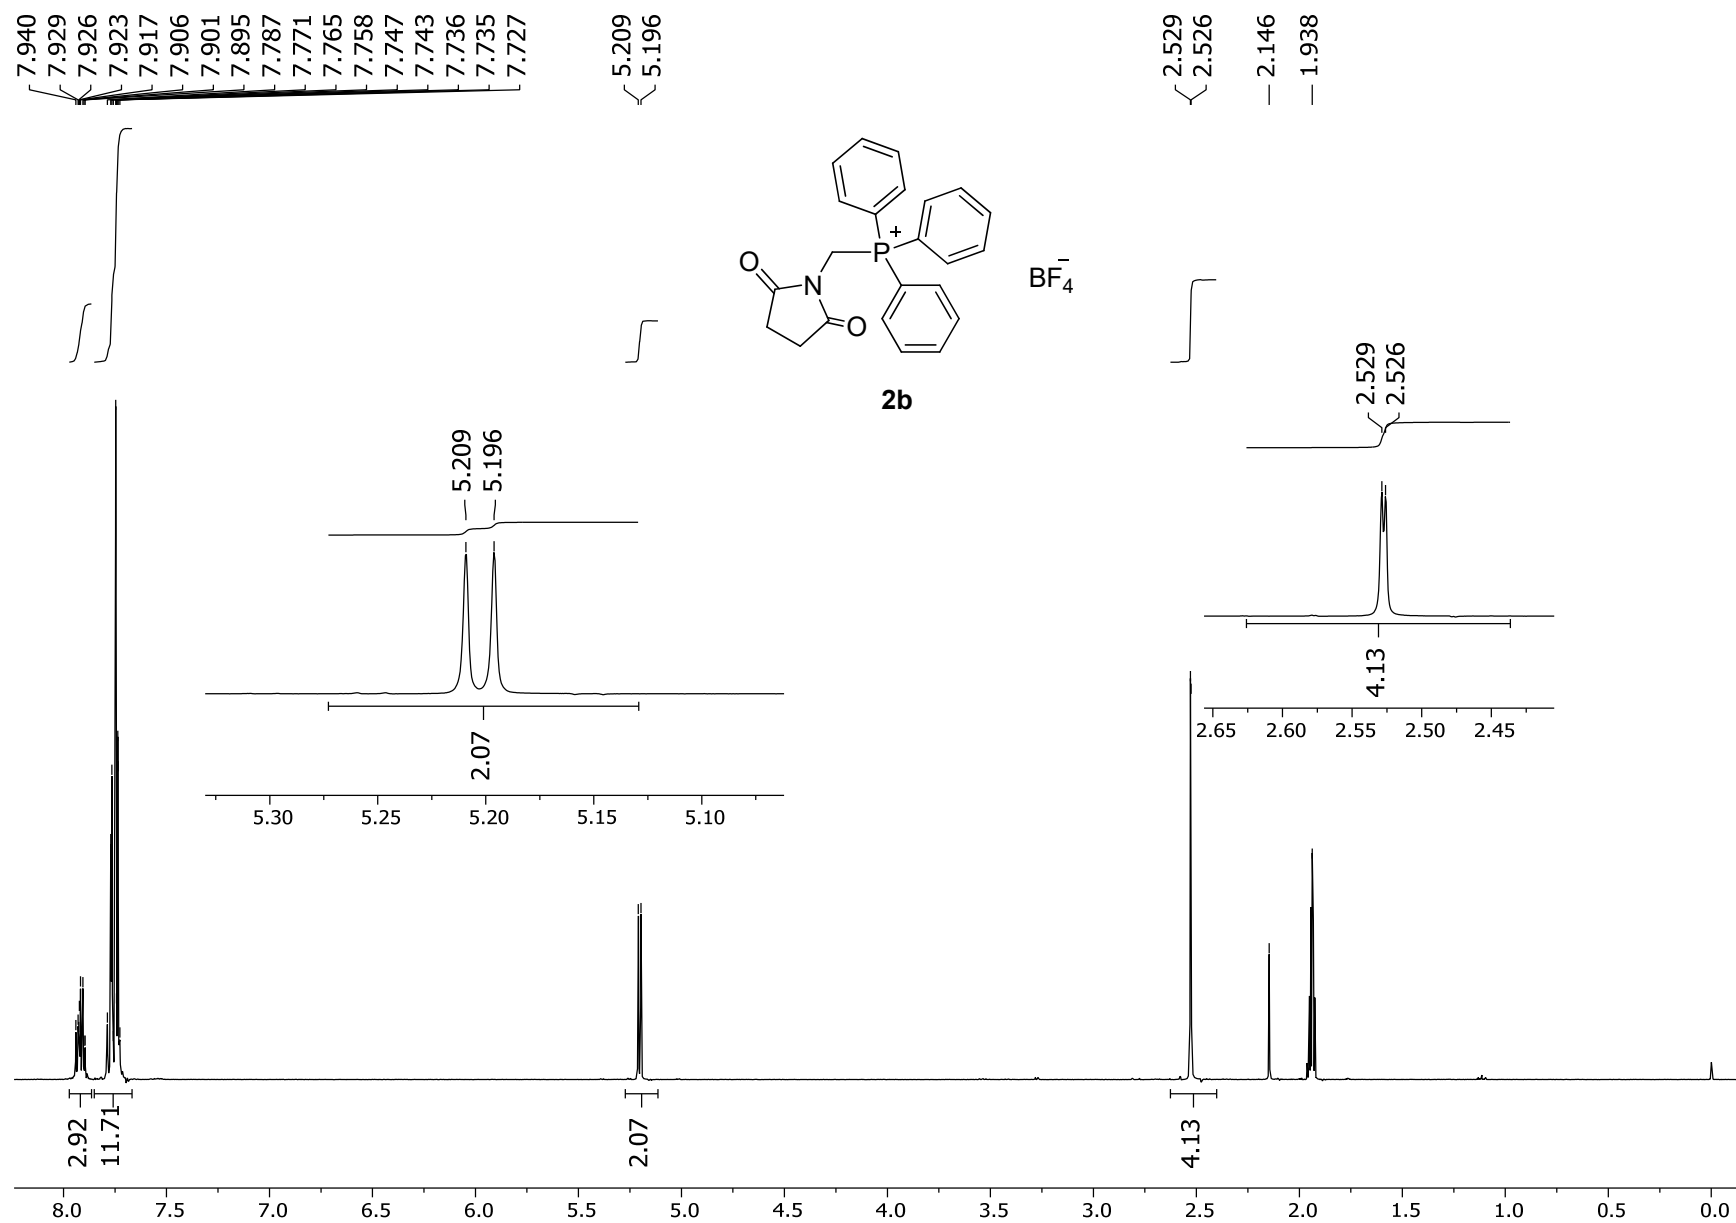

$^1\text{H}$  NMR spectrum of 1-(N-succinimido)methyltriphenylphosphonium tetrafluoroborate (**2b**); 400 MHz/ $\text{CD}_3\text{CN}/\text{TMS}$ ;  $\delta$  (ppm).

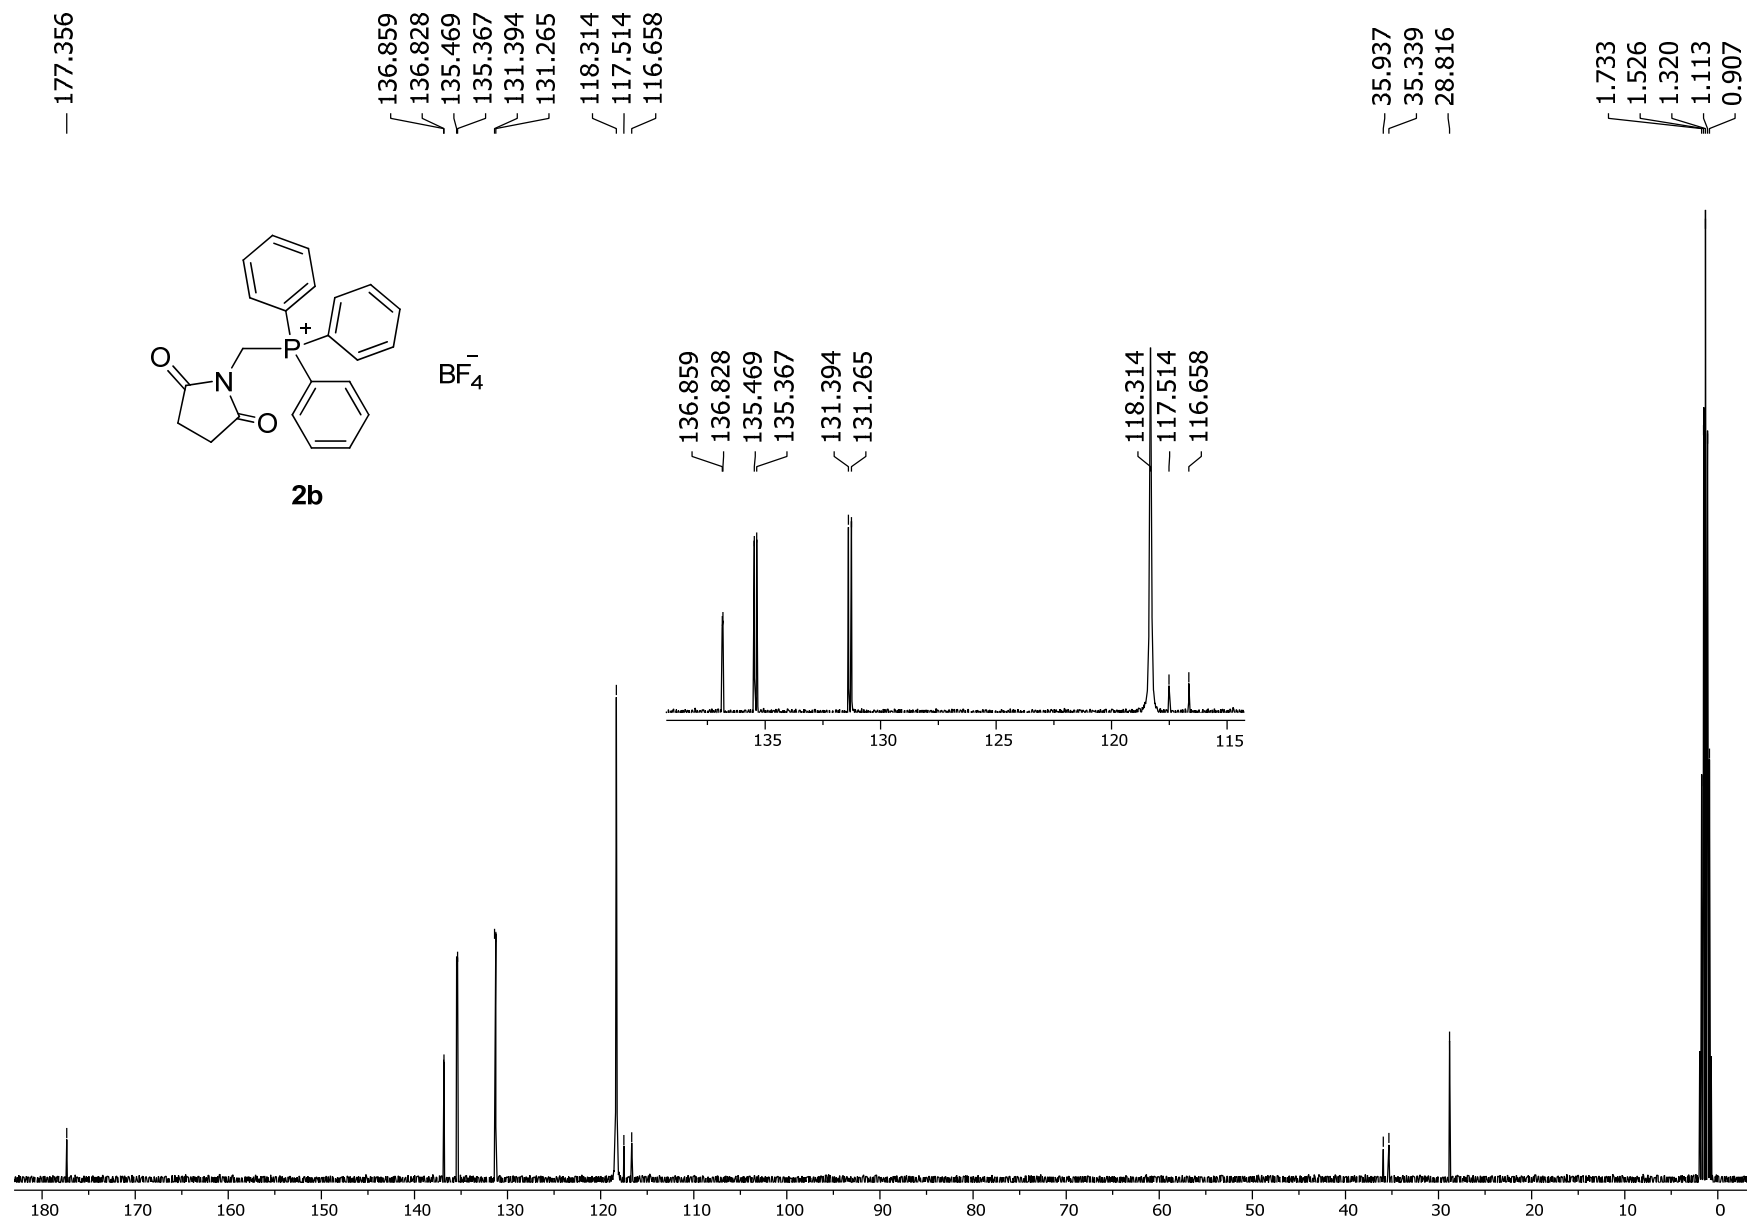

$^{13}\text{C}\{^1\text{H}\}$  NMR spectrum of 1-(*N*-succinimido)methyltriphenylphosphonium tetrafluoroborate (**2b**); 100 MHz/ $\text{CD}_3\text{CN}/\text{TMS}$ ;  $\delta$  (ppm).

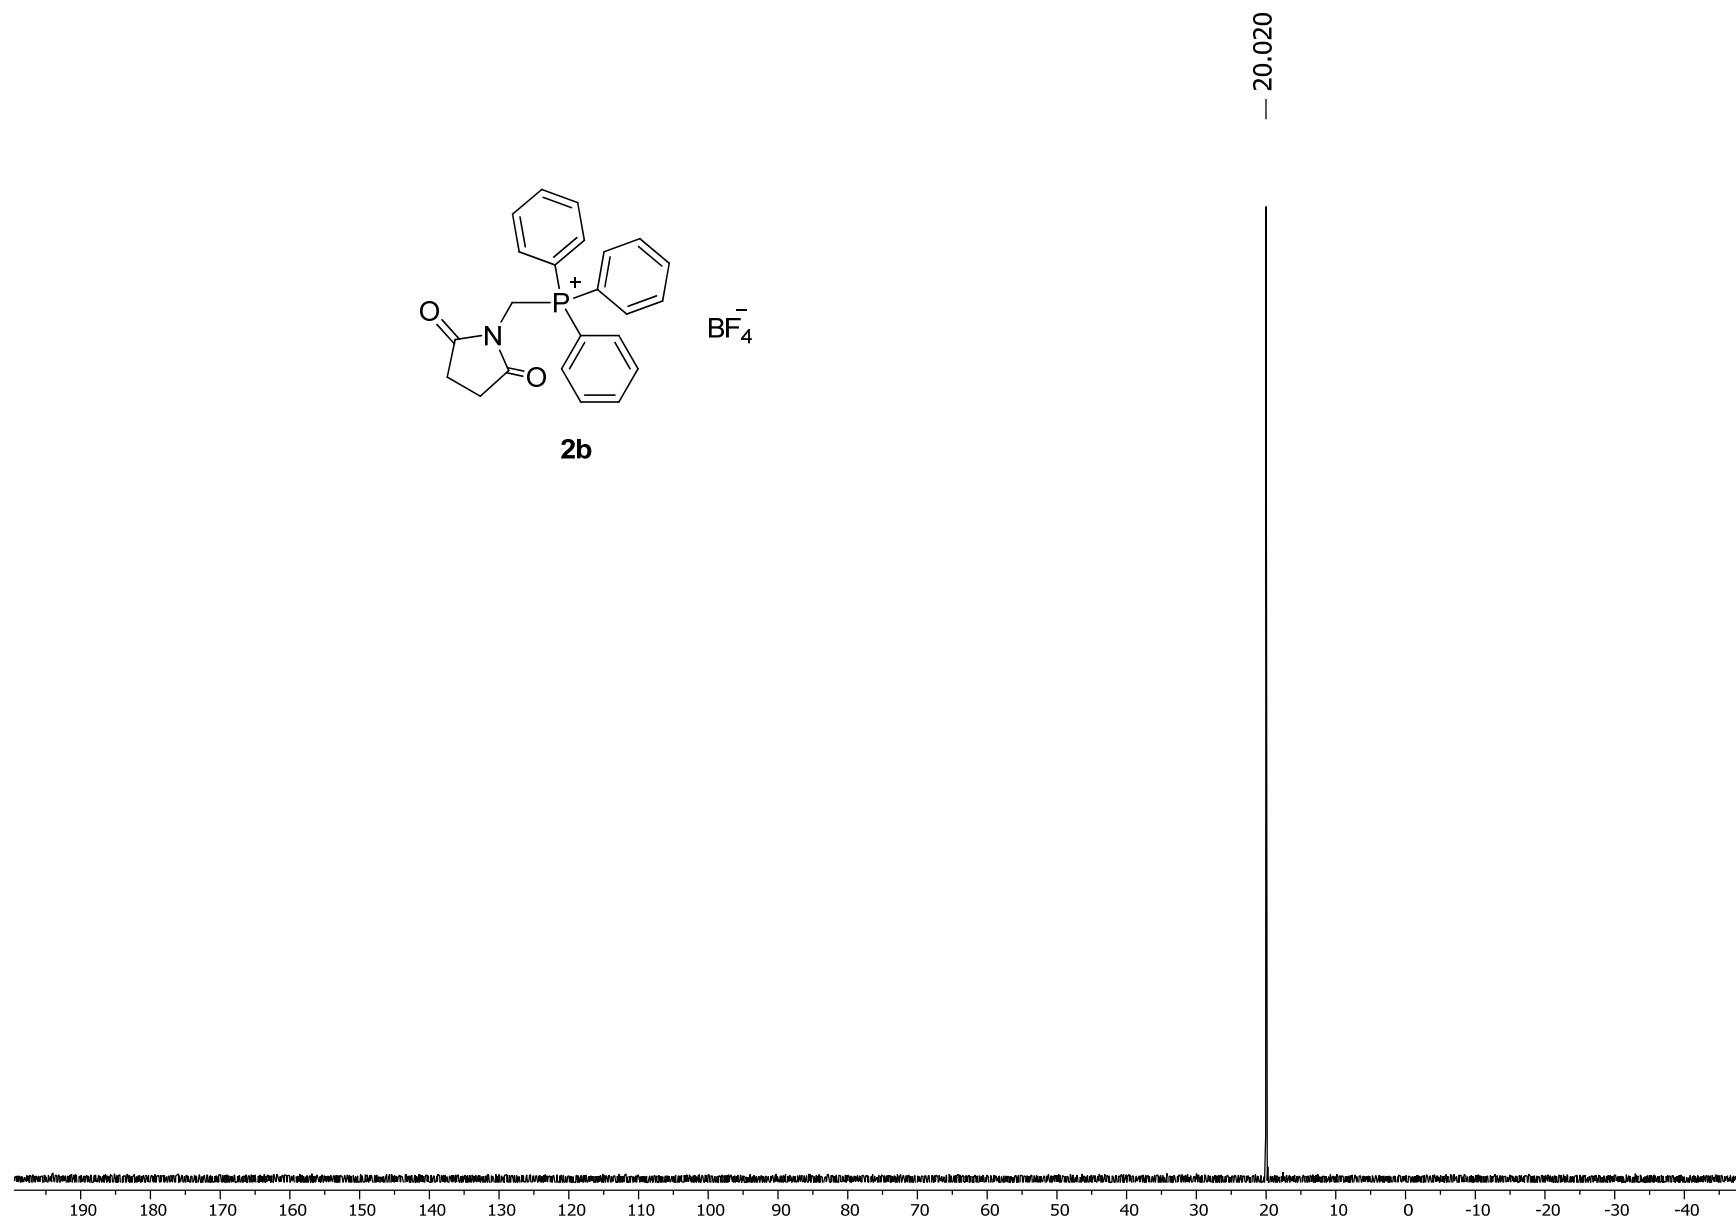





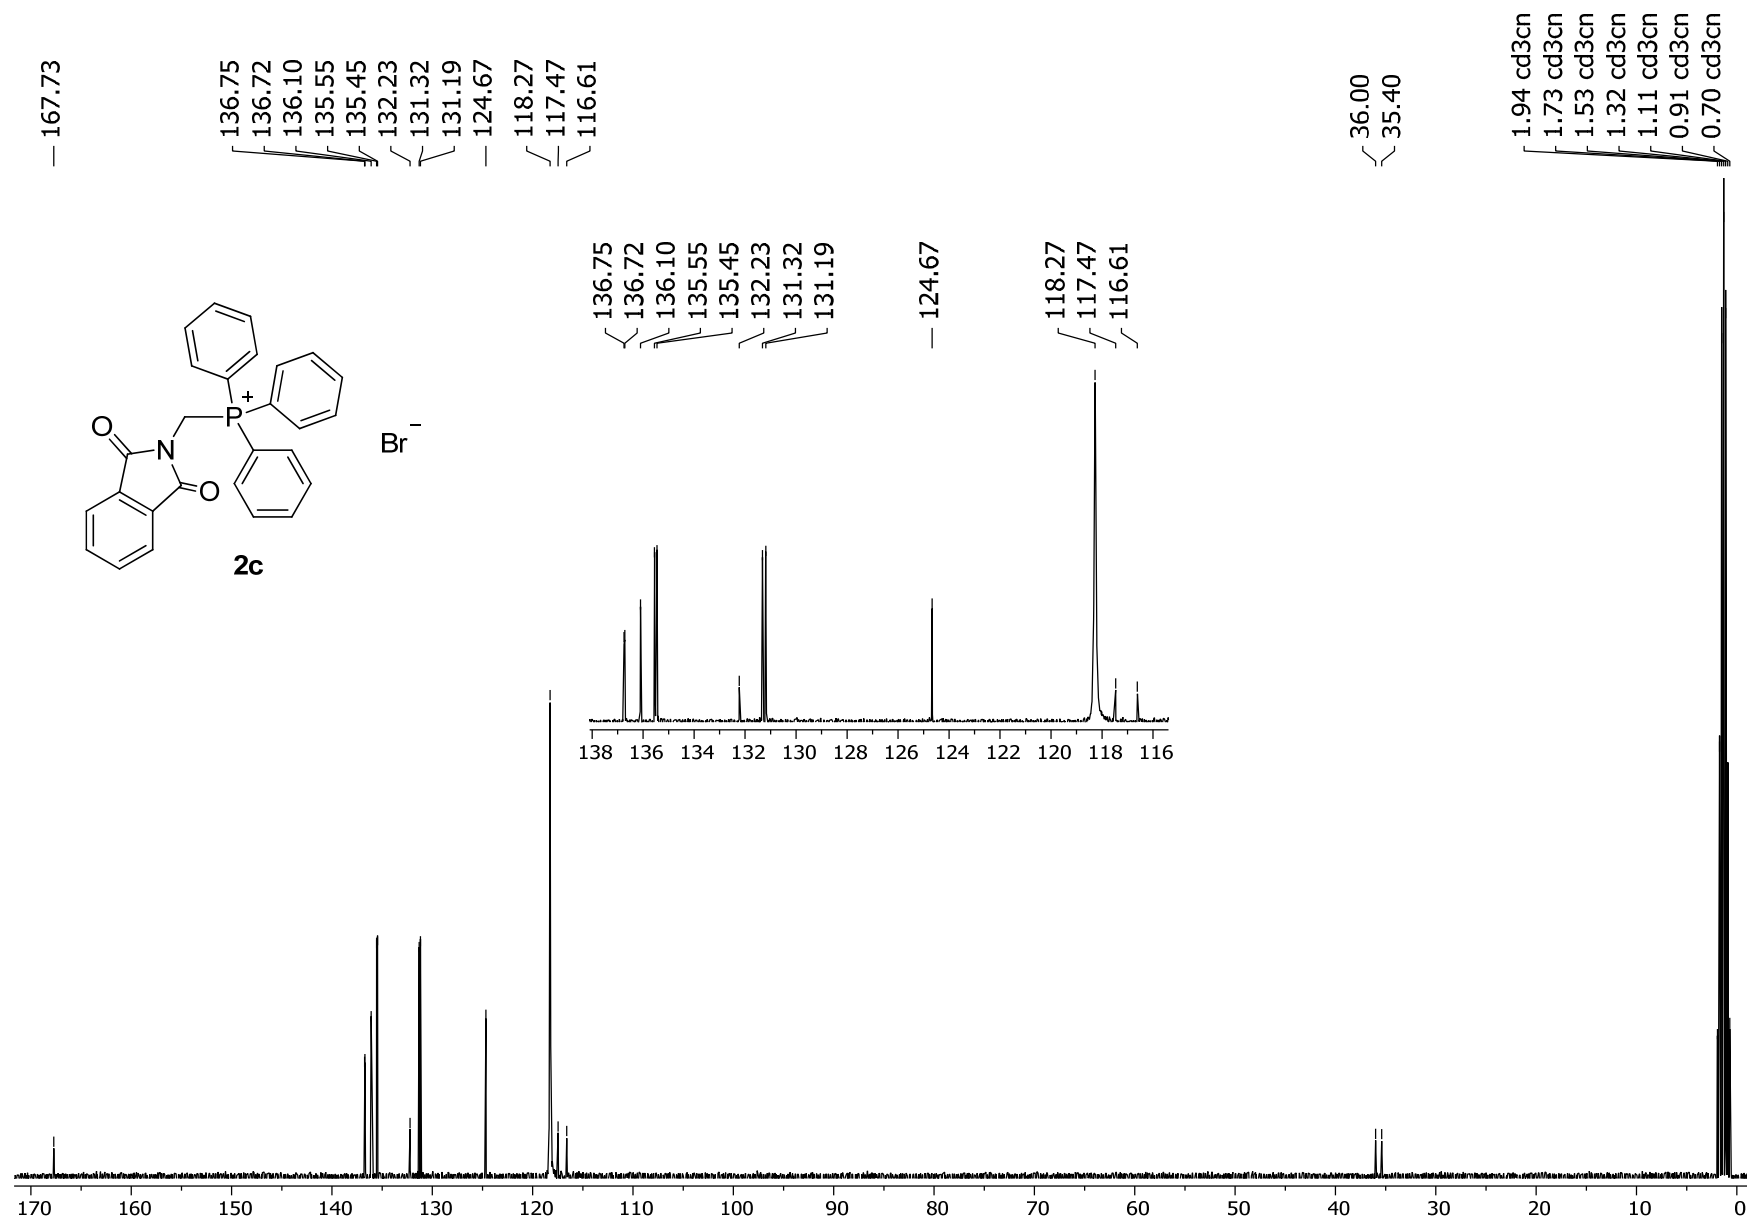

<sup>13</sup>C{<sup>1</sup>H} NMR spectrum of 1-(*N*-phthalimido)methyltriphenylphosphonium bromide (**2c**); 100 MHz/CD<sub>3</sub>CN/TMS; δ (ppm).

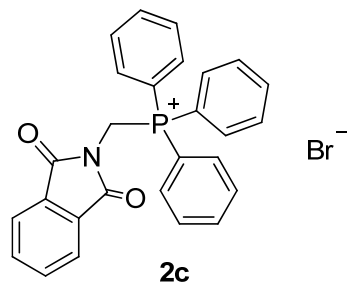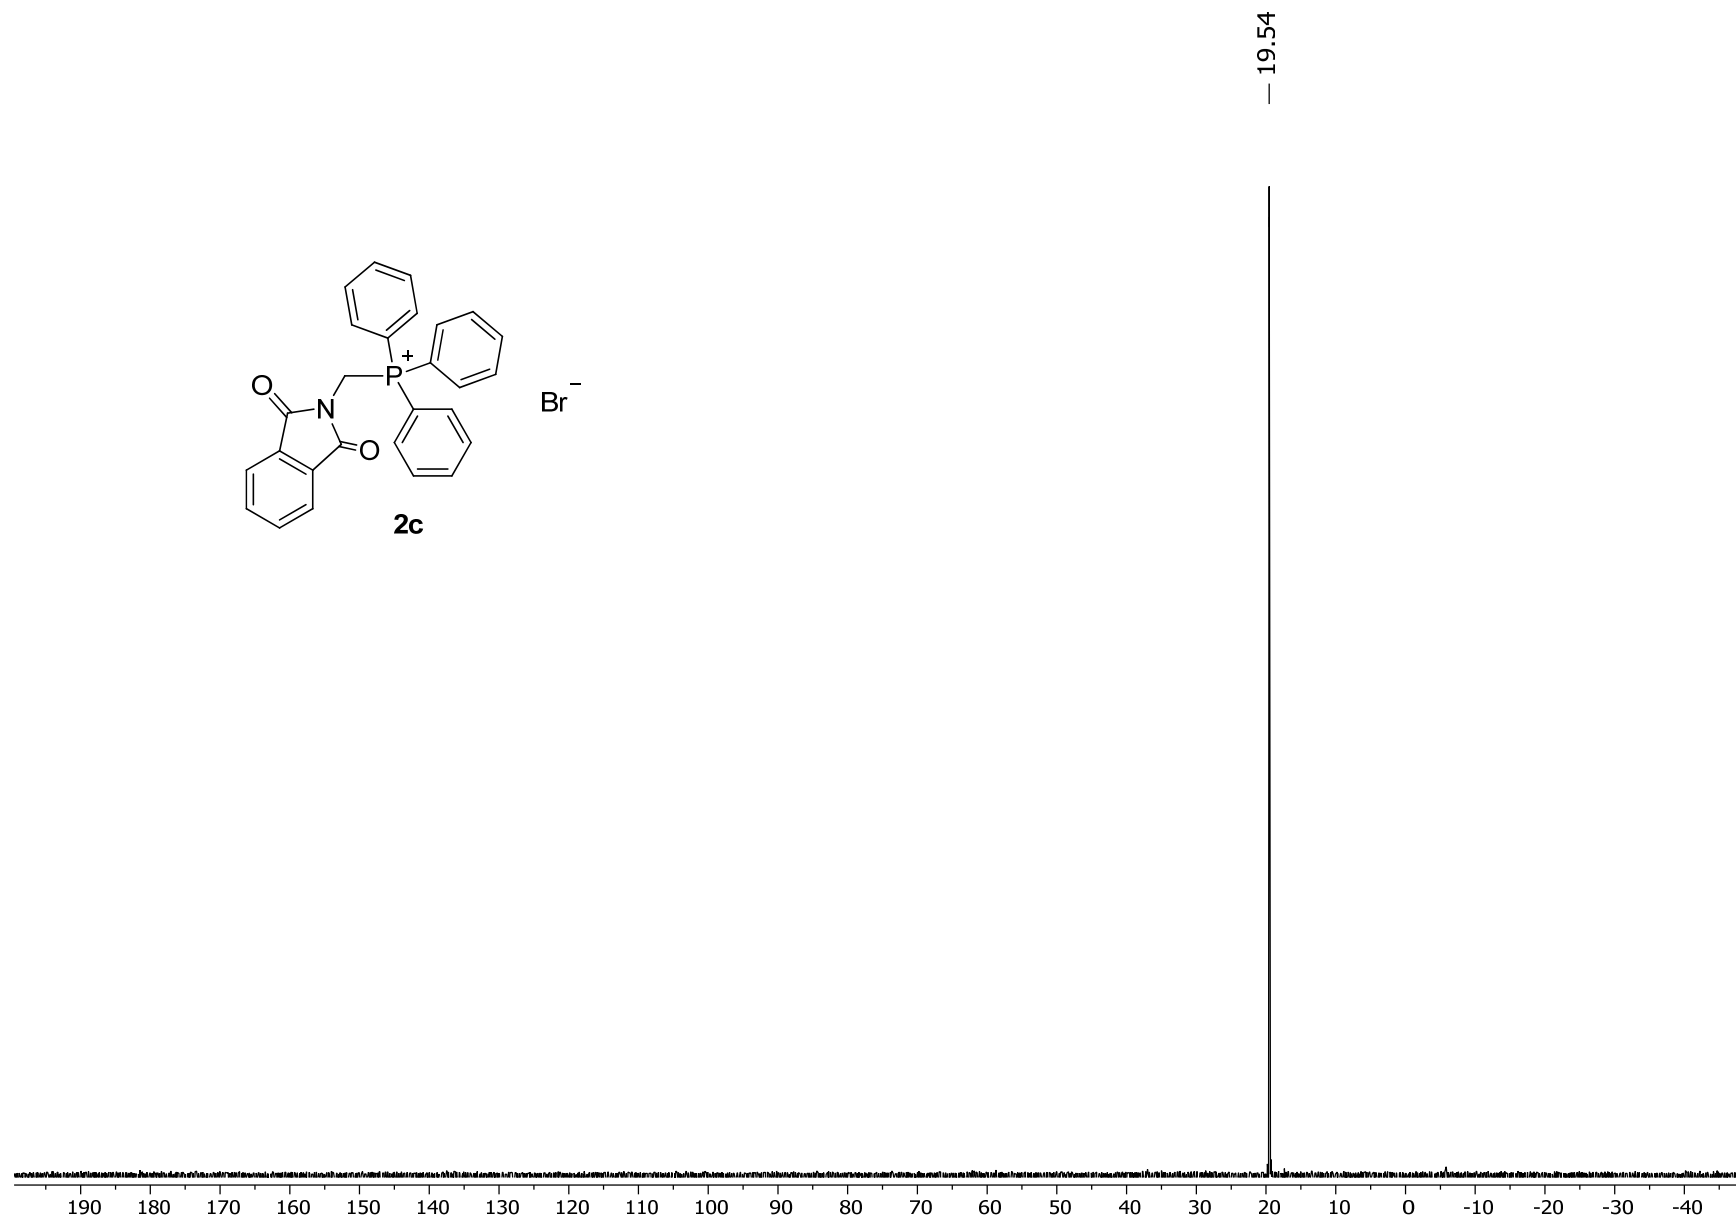

$^{31}\text{P}\{^1\text{H}\}$  NMR spectrum of 1-(*N*-phthalimido)methyltriphenylphosphonium bromide (**2c**); 161.9 MHz/ $\text{CD}_3\text{CN}$ ;  $\delta$  (ppm).

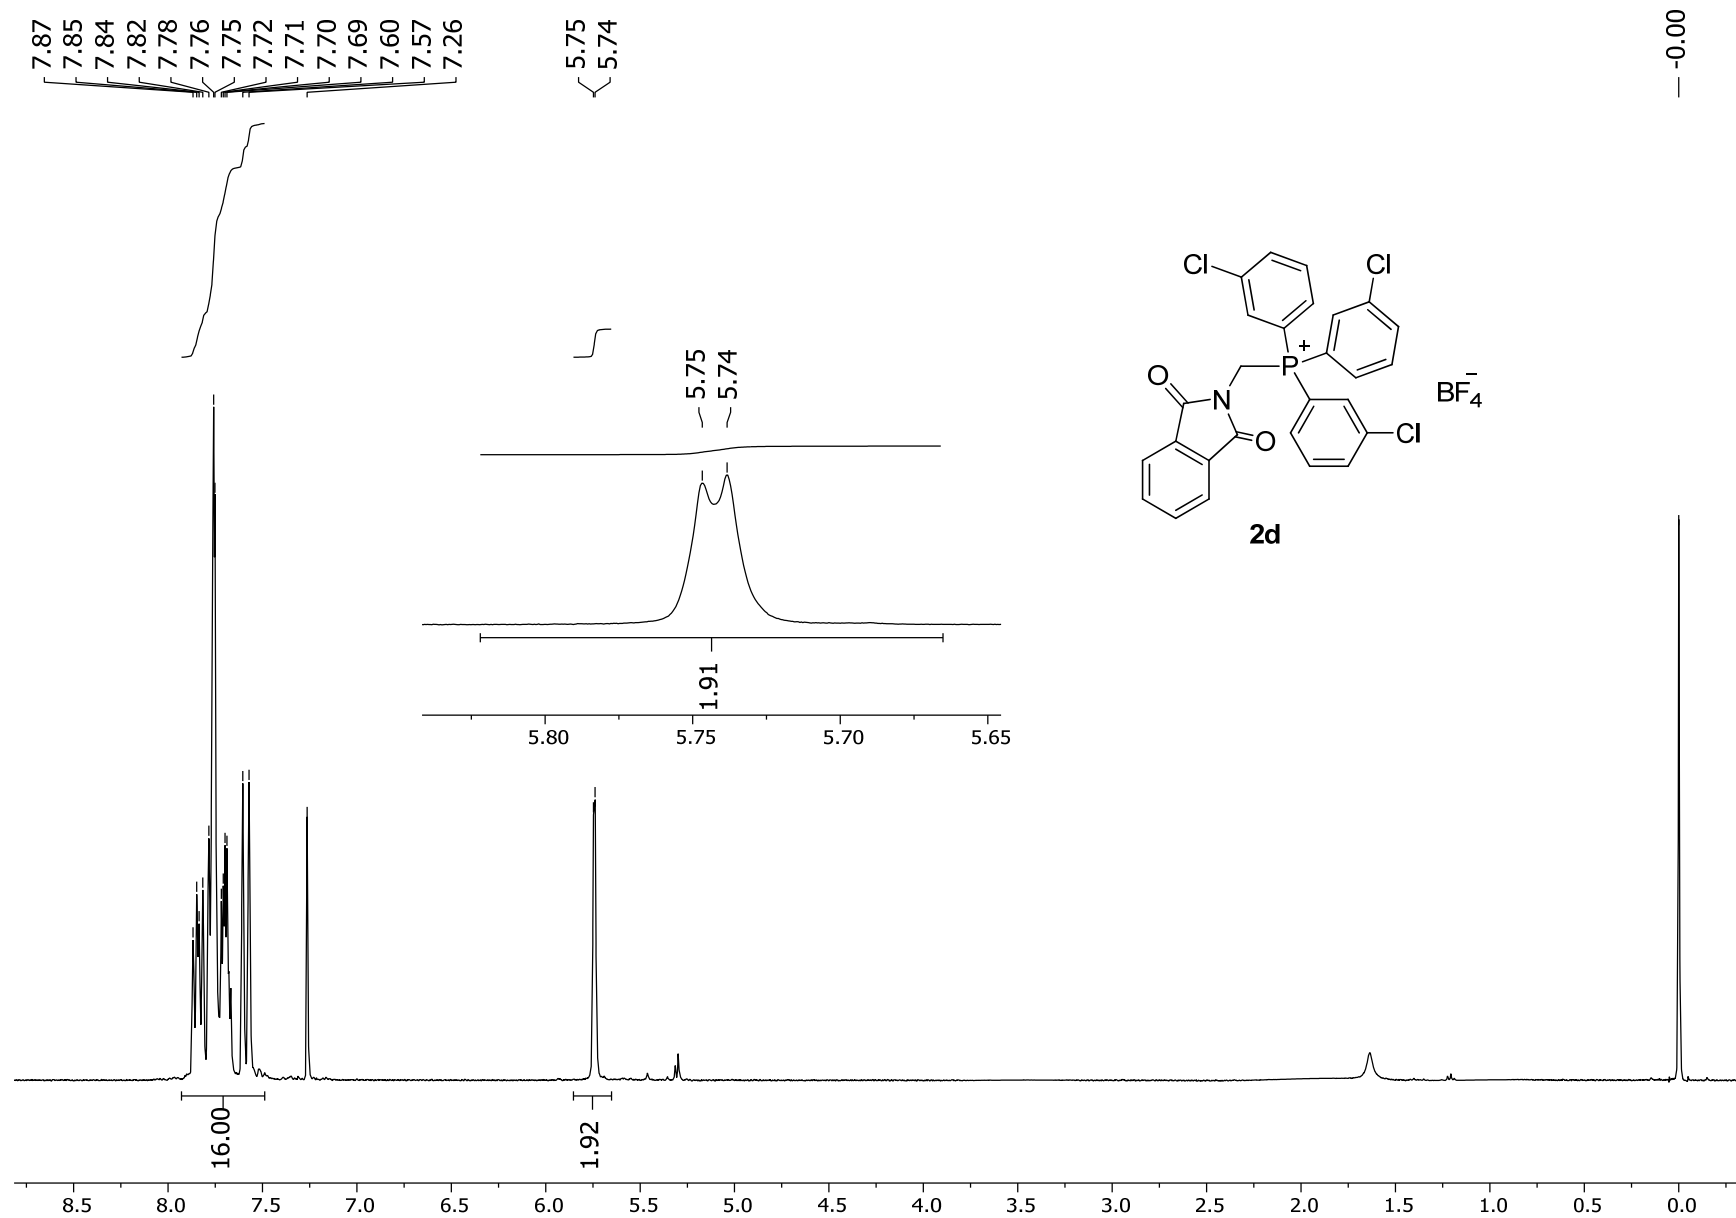

$^1\text{H}$  NMR spectrum of 1-(N-phthalimido)methyltris(3-chlorophenyl)phosphonium tetrafluoroborate (**2d**); 400 MHz/ $\text{CDCl}_3/\text{TMS}$ ;  $\delta$  (ppm).

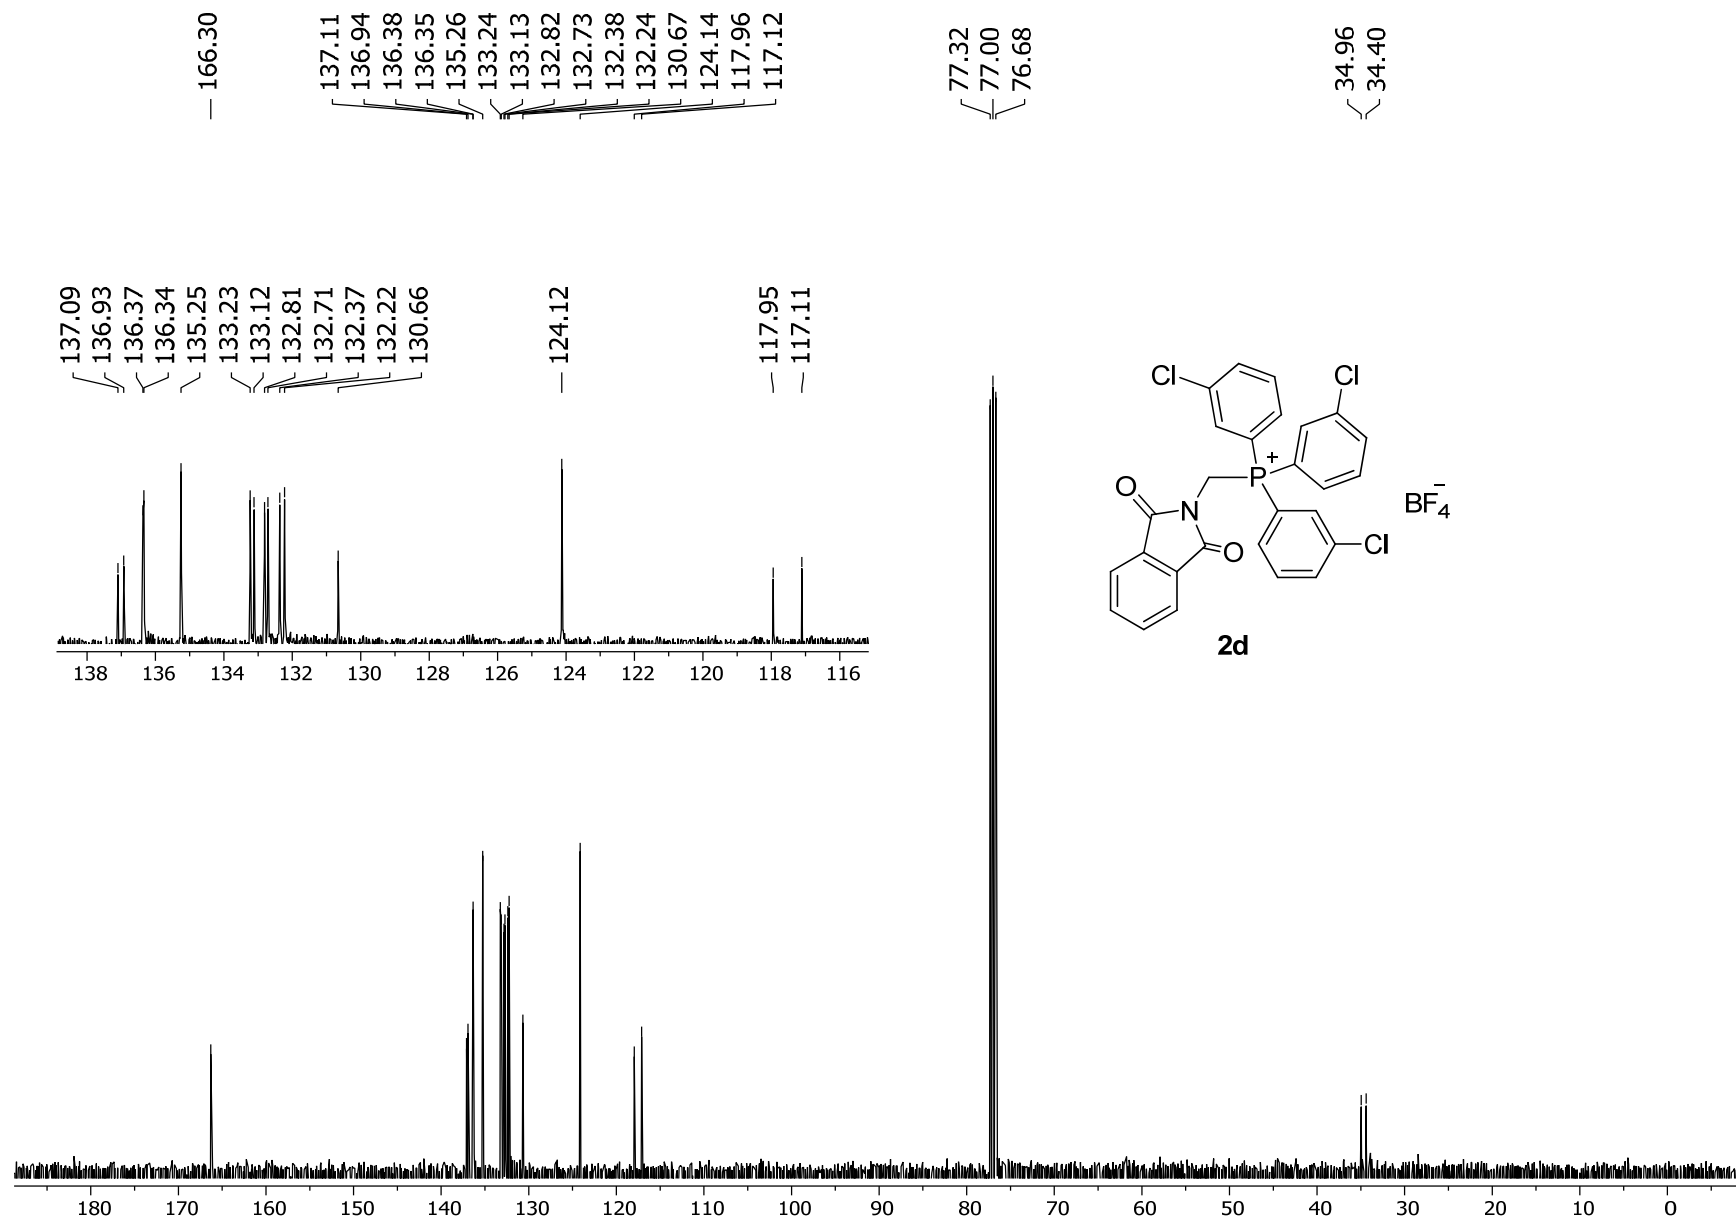

$^{13}\text{C}\{^1\text{H}\}$  NMR spectrum of 1-(*N*-phthalimido)methyltris(3-chlorophenyl)phosphonium tetrafluoroborate (**2d**); 100 MHz/ $\text{CDCl}_3/\text{TMS}$ ;  $\delta$  (ppm).

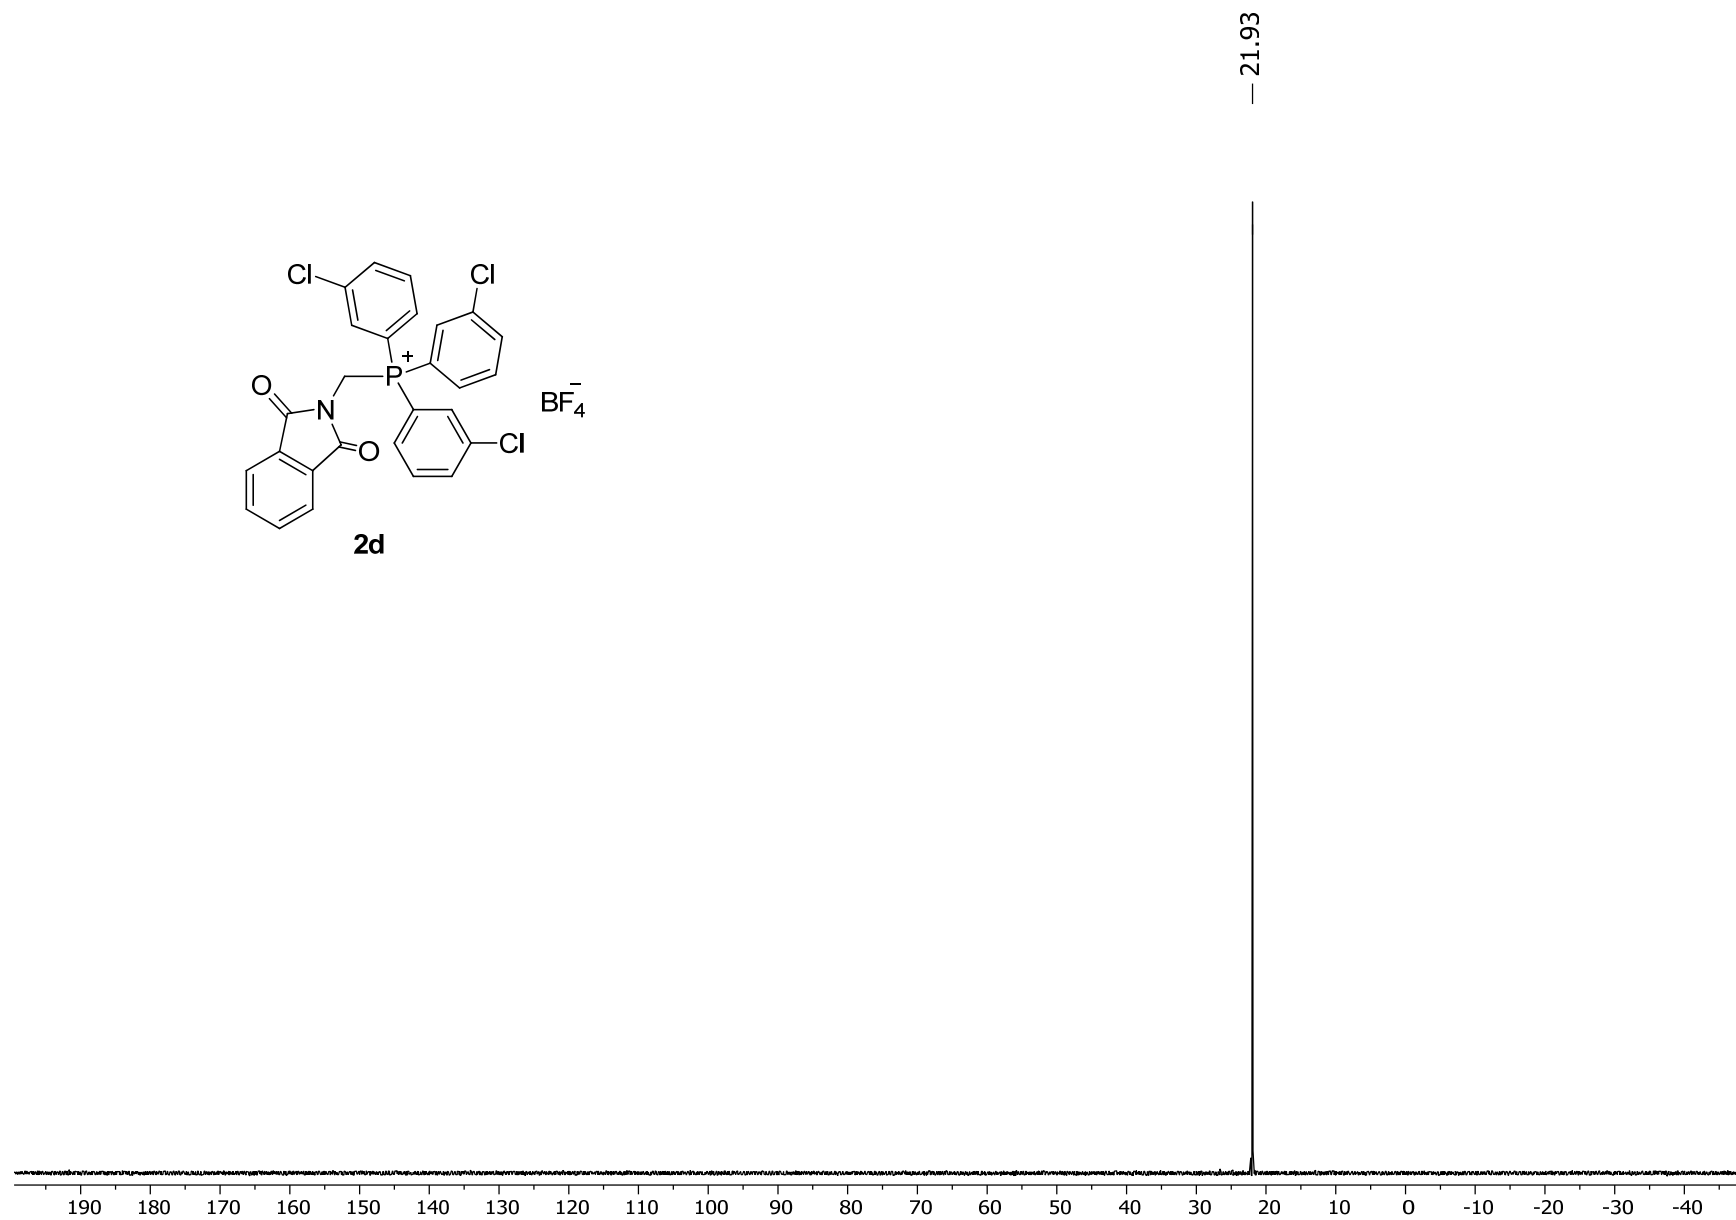

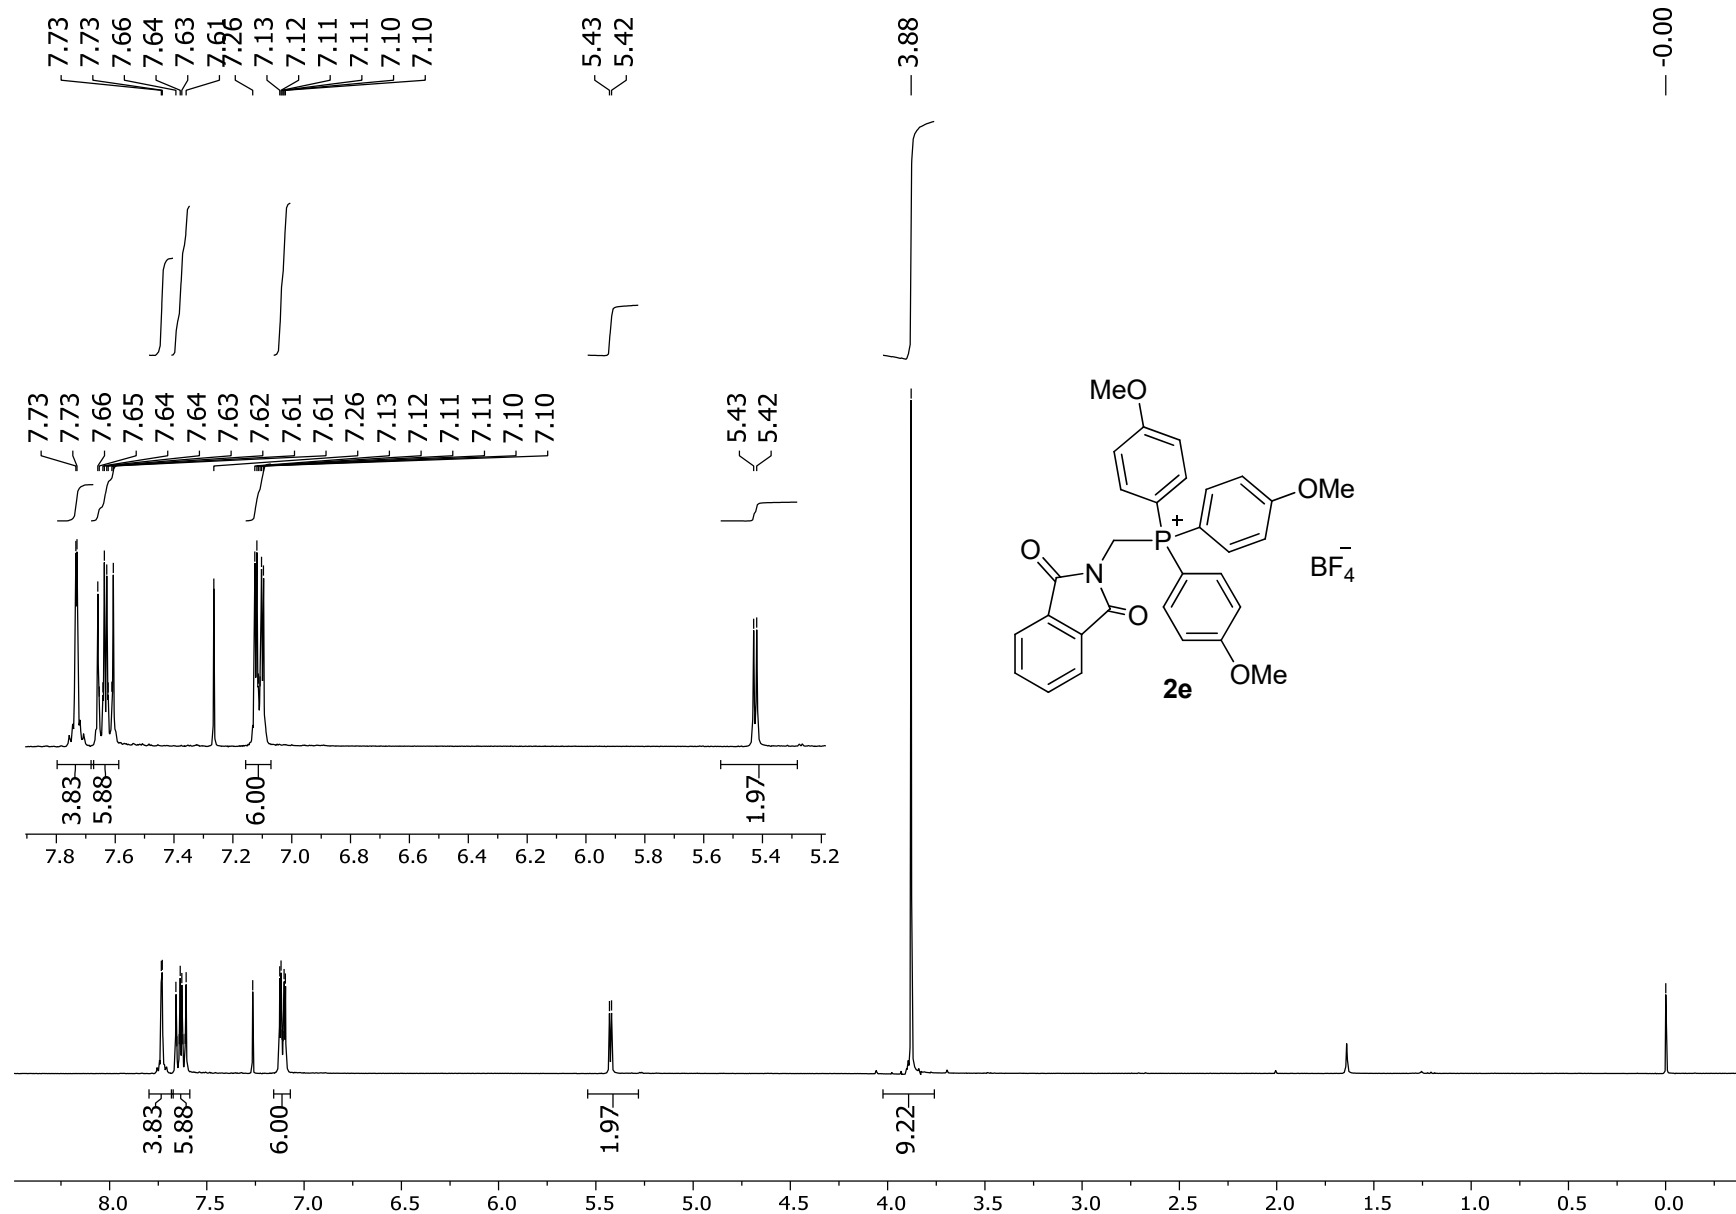

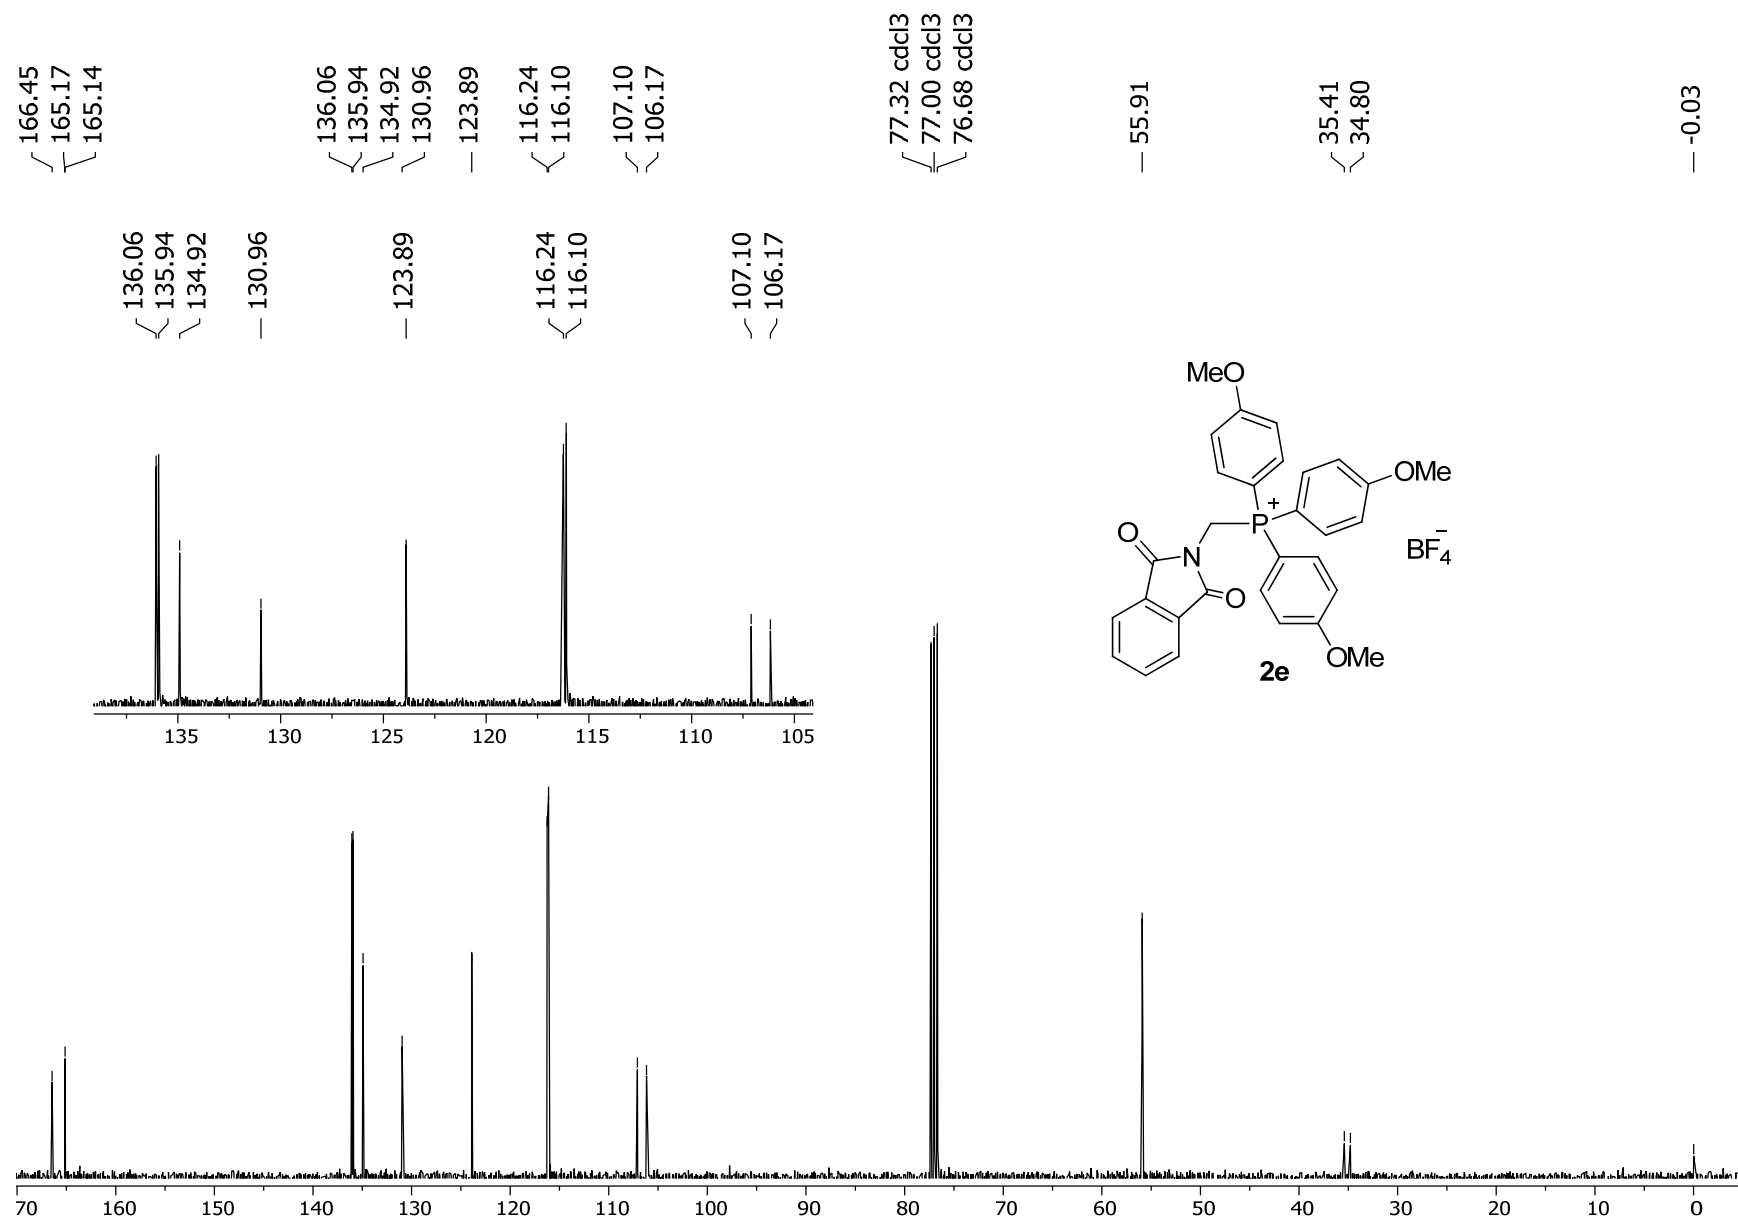

$^{13}\text{C}\{^1\text{H}\}$  NMR spectrum of 1-(N-phthalimido)methyltris(4-methoxyphenyl)phosphonium tetrafluoroborate (**2e**); 100 MHz/ $\text{CDCl}_3/\text{TMS}$ ;  $\delta$  (ppm).



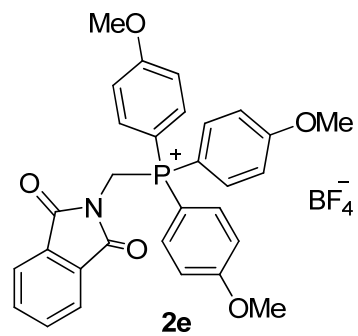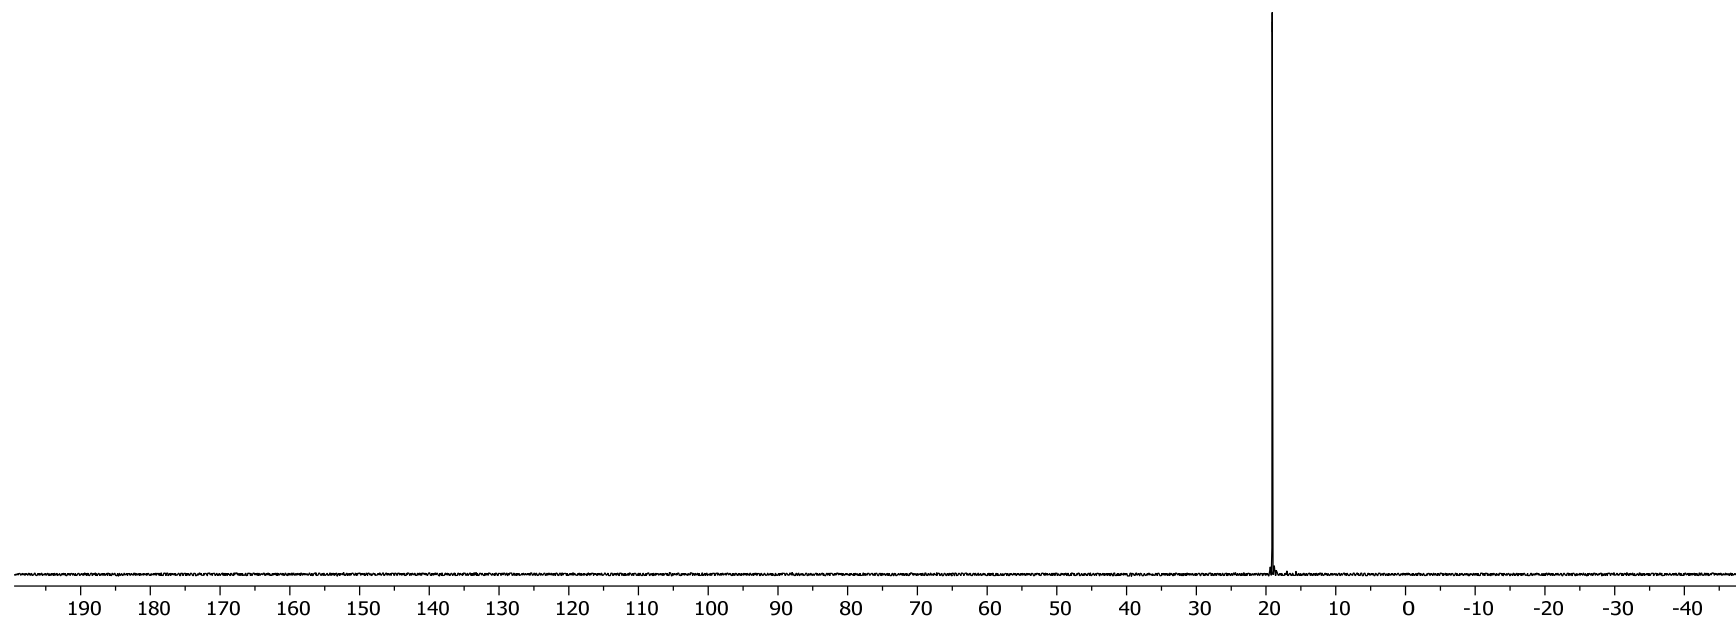

$^{31}\text{P}\{^1\text{H}\}$  NMR spectrum of 1-(*N*-phthalimido)methyltris(4-methoxyphenyl)phosphonium tetrafluoroborate (**2e**); 161.9 MHz/ $\text{CDCl}_3$ ;  $\delta$  (ppm).

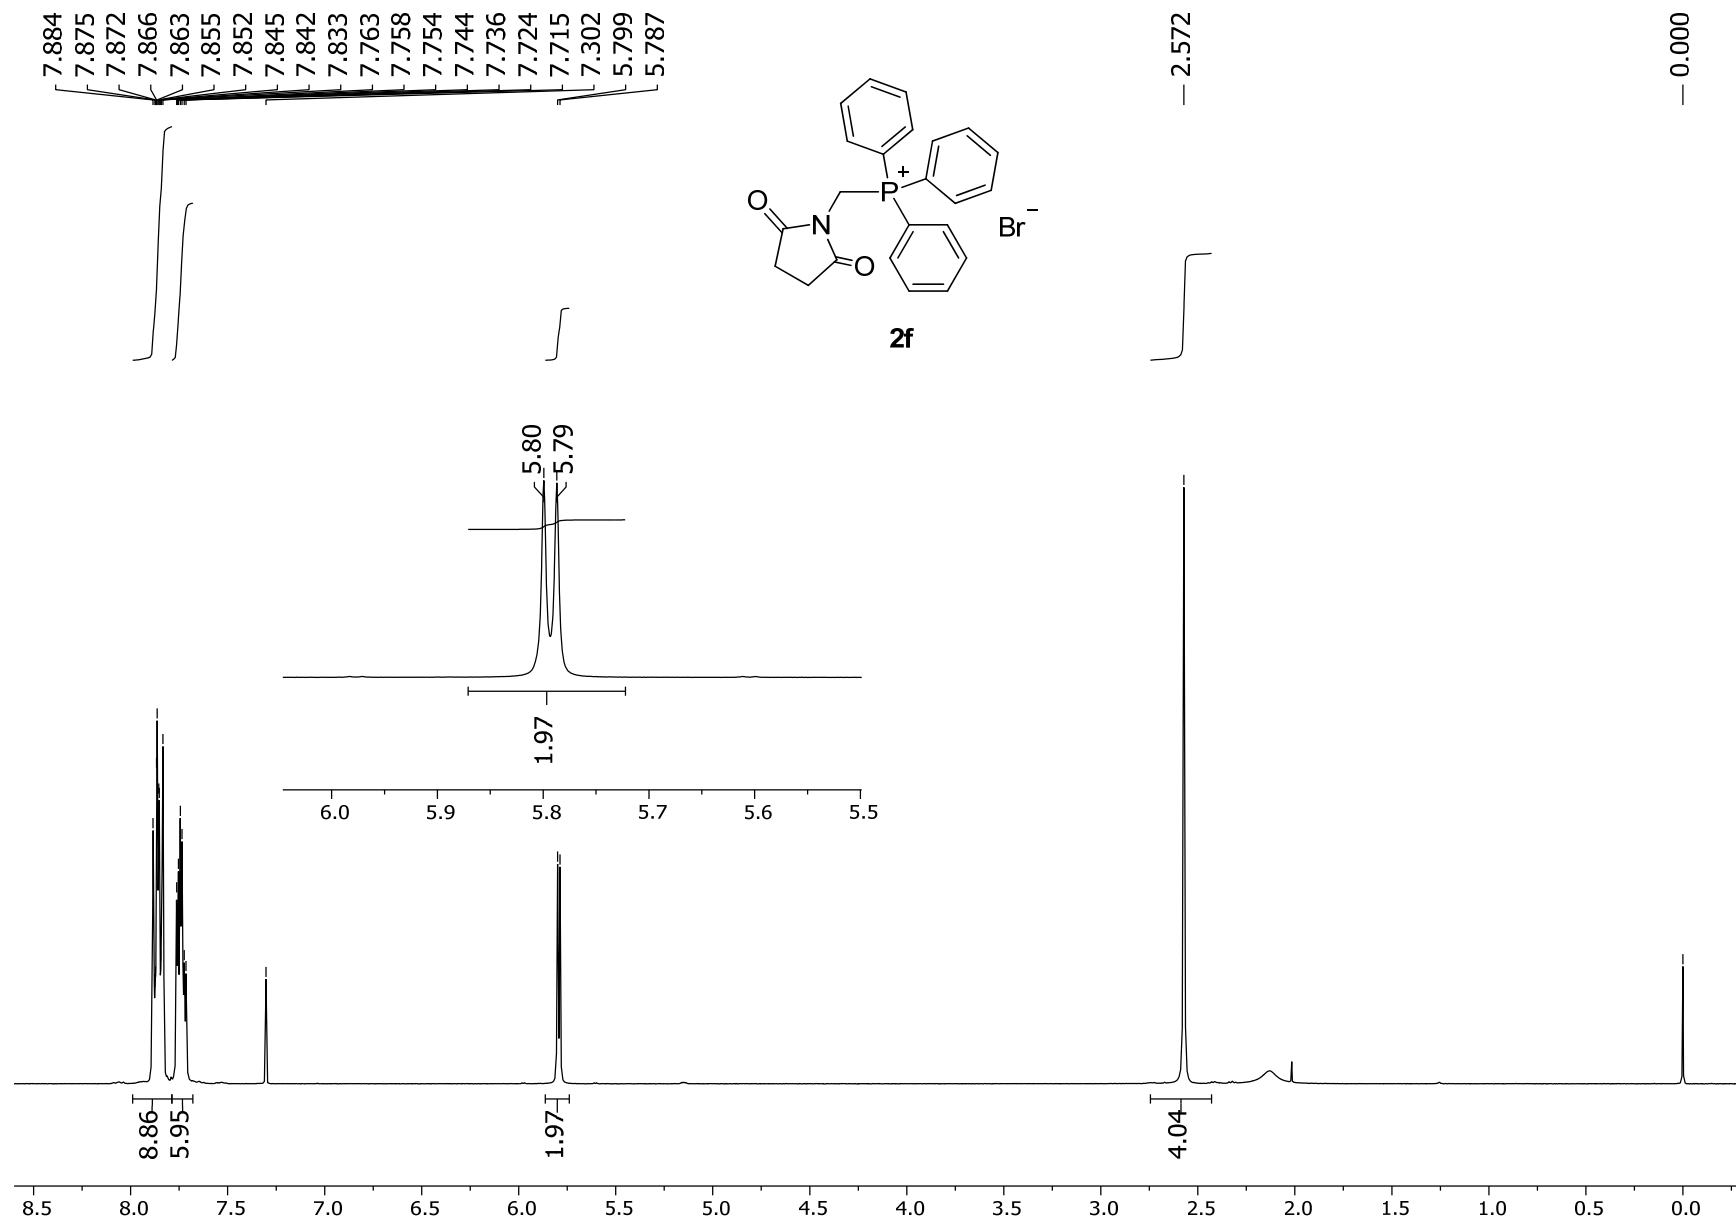

<sup>1</sup>H NMR spectrum of 1-(*N*-succinimido)methyltriphenylphosphonium bromide (**2f**); 400 MHz/CDCl<sub>3</sub>/TMS; δ (ppm).

PZ-37 kryst-13C  
PZ-37 kryst-13C

— 176.01

135.77  
135.74  
134.38  
134.28  
130.63  
130.50  
116.98  
116.13

77.48  
77.16  
76.84

36.59  
36.03  
— 28.36

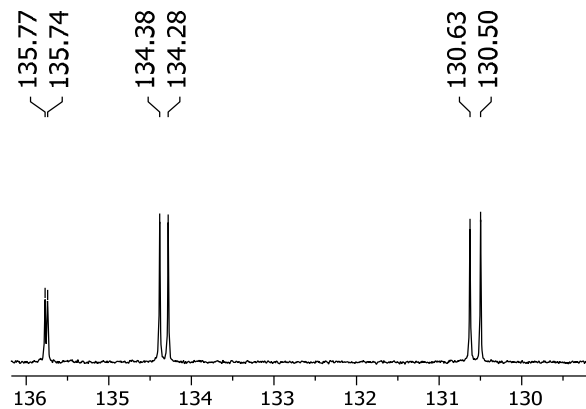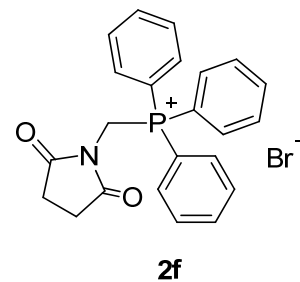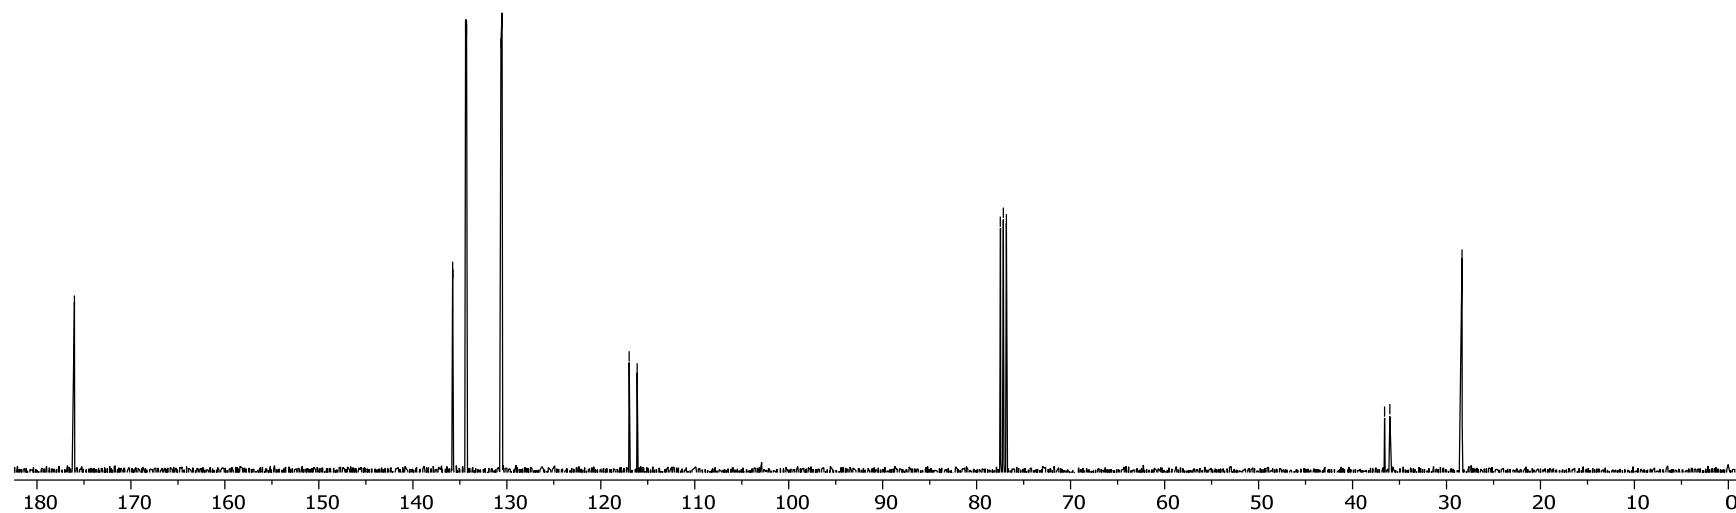

$^{13}\text{C}\{^1\text{H}\}$  NMR spectrum of 1-(*N*-succinimido)methyltriphenylphosphonium bromide (**2f**); 100 MHz/ $\text{CDCl}_3/\text{TMS}$ ;  $\delta$  (ppm).

PZ-37-kryst-31P-2skany  
H-37-kryst-31P

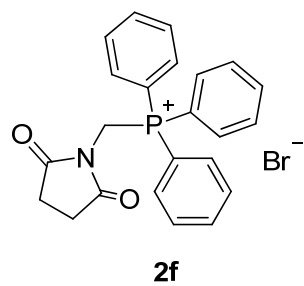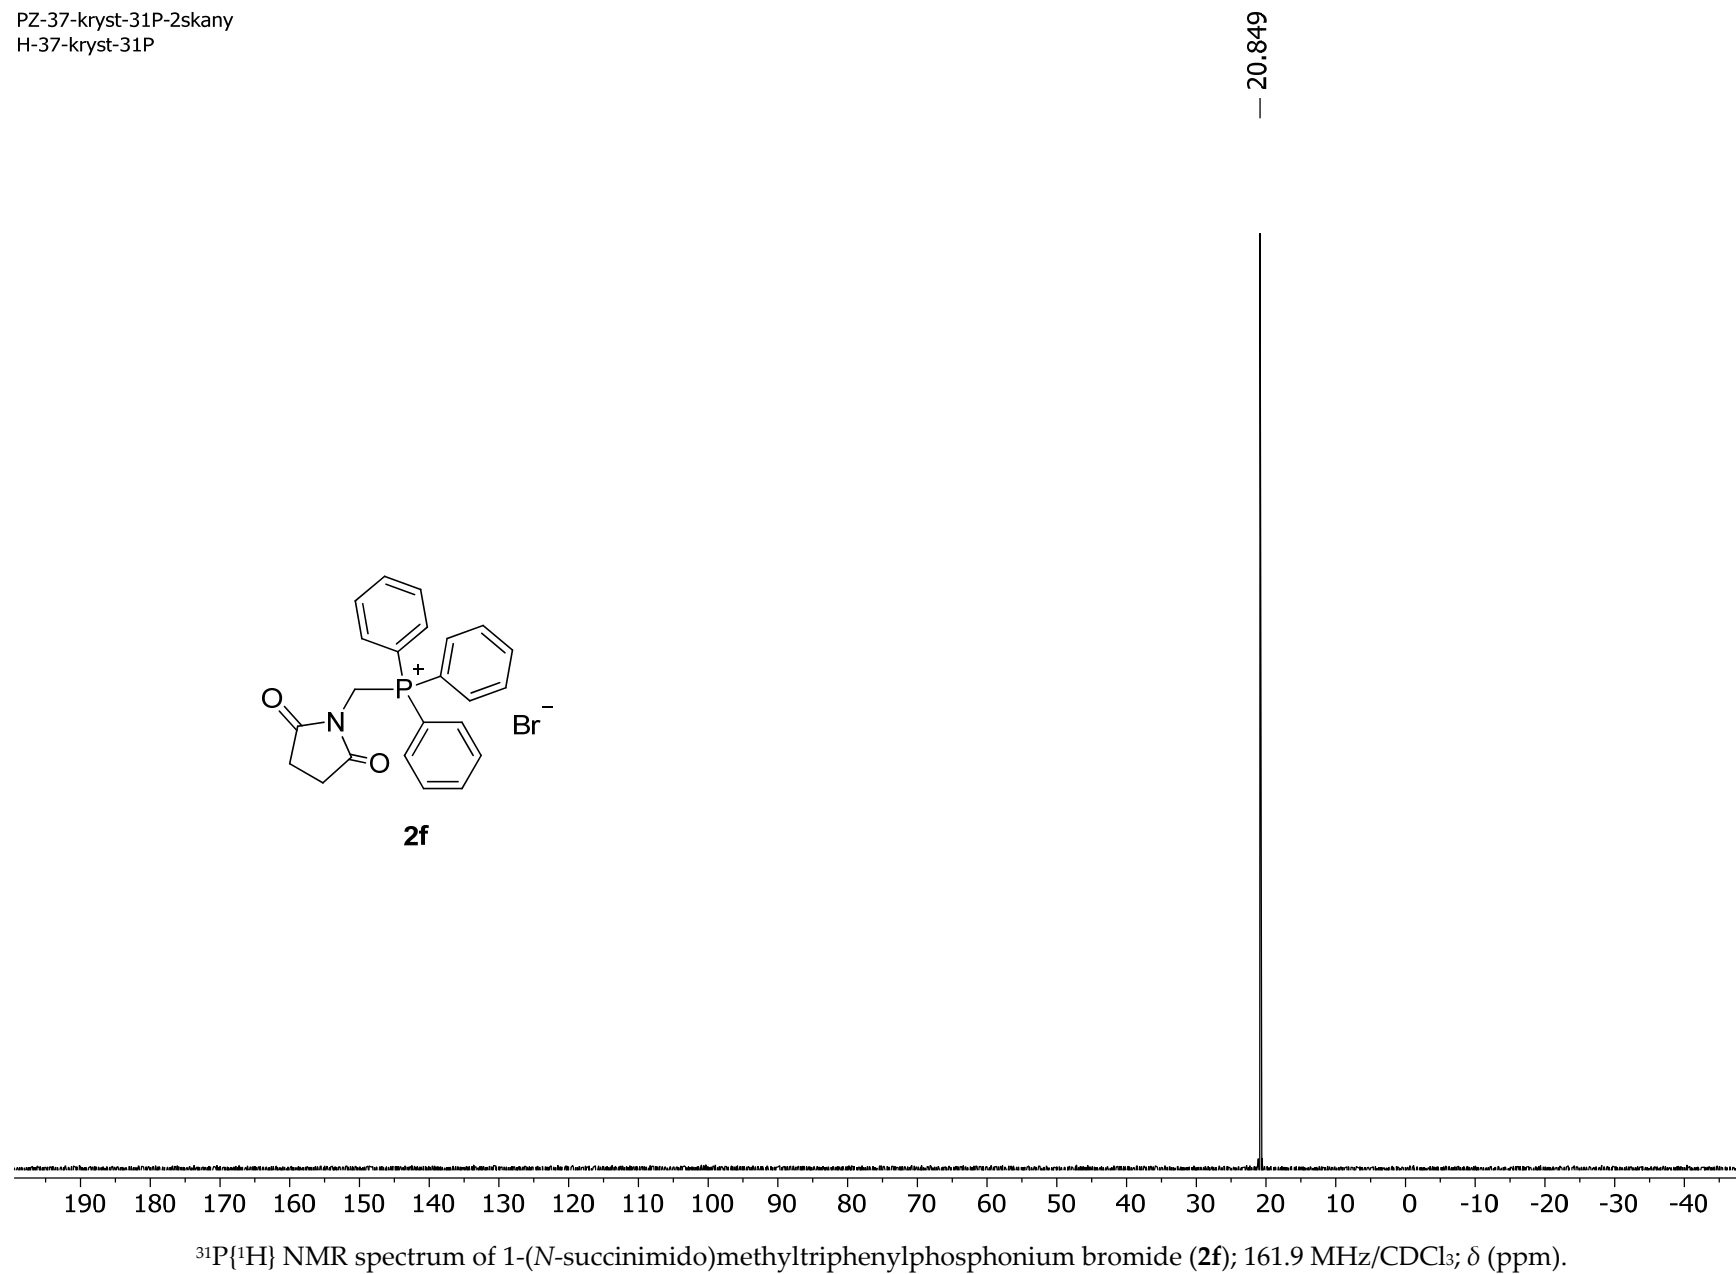

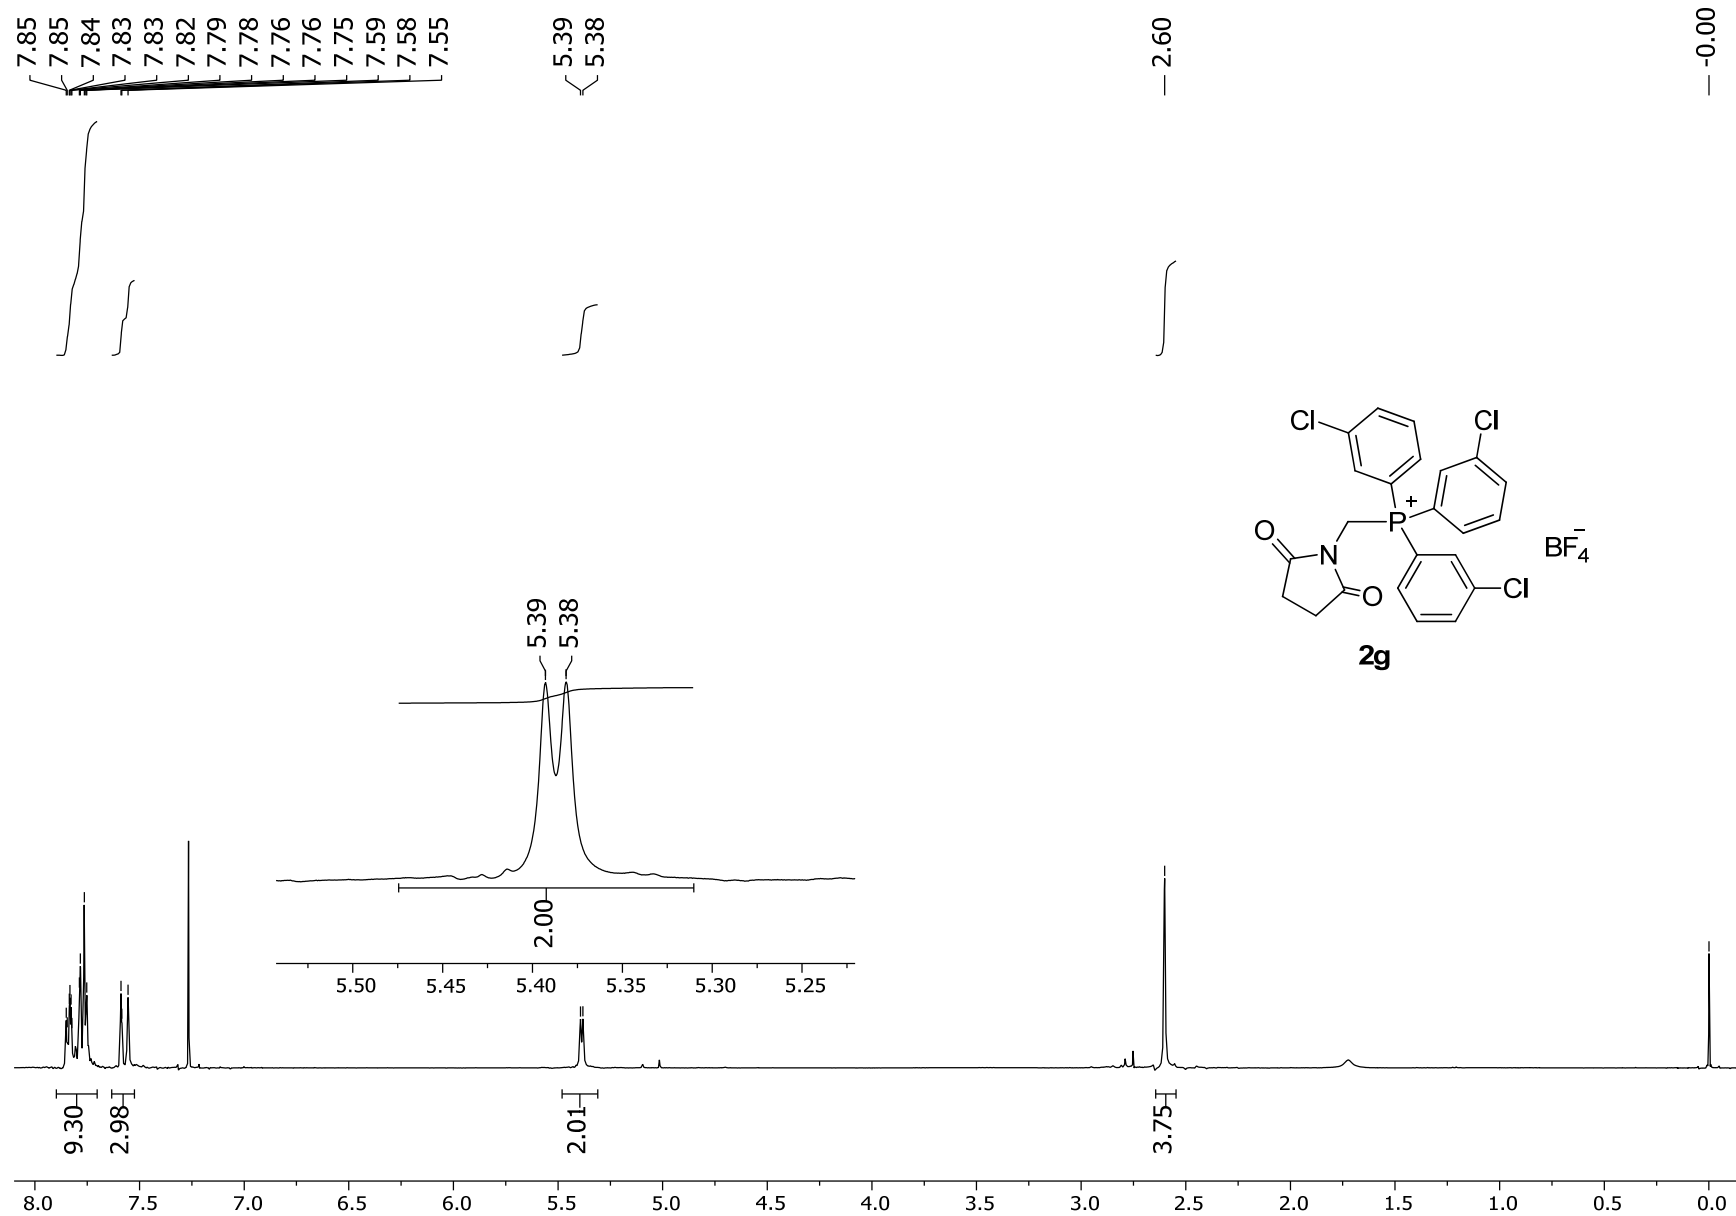

<sup>1</sup>H NMR spectrum of 1-(*N*-succinimido)methyltris(3-chlorophenyl)phosphonium tetrafluoroborate (**2g**); 400 MHz/CDCl<sub>3</sub>/TMS; δ (ppm).

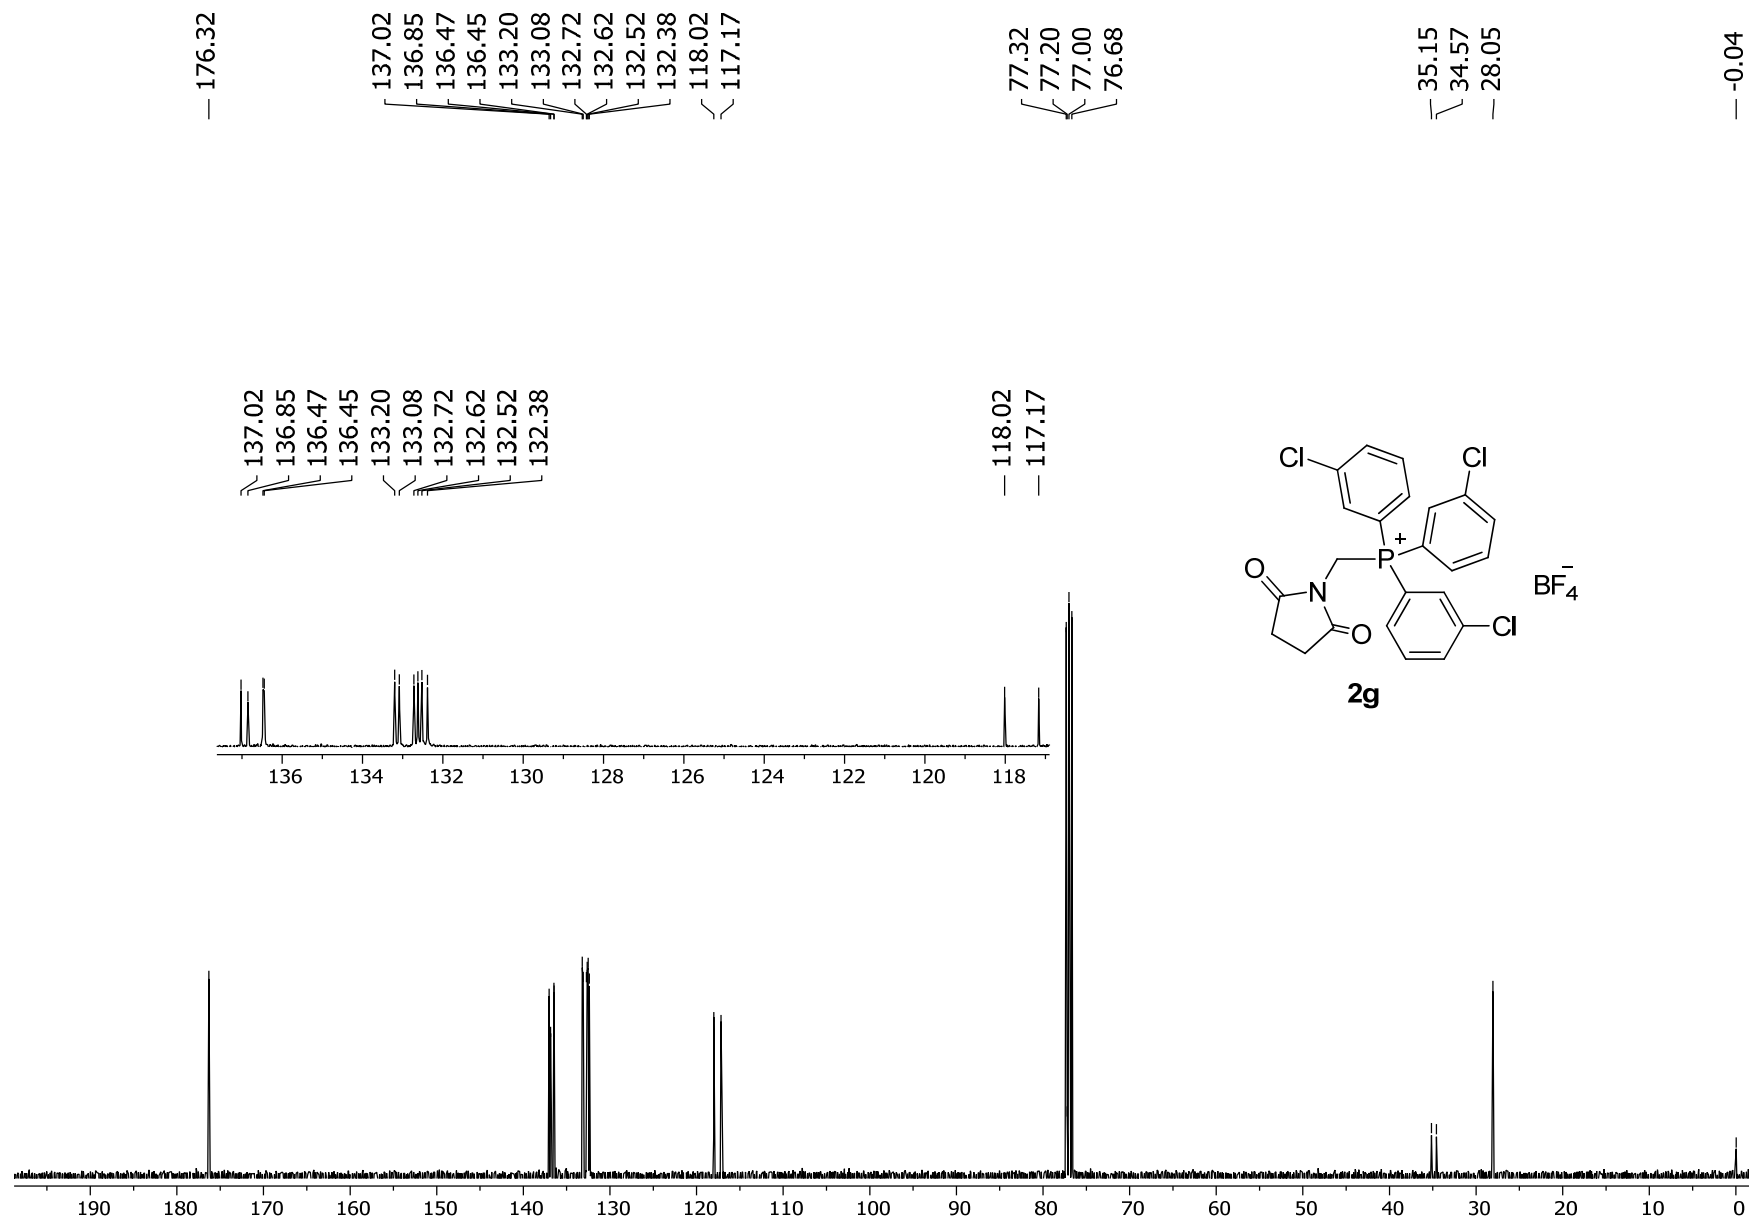

<sup>13</sup>C{<sup>1</sup>H} NMR spectrum of 1-(*N*-succinimido)methyltris(3-chlorophenyl)phosphonium tetrafluoroborate (**2g**); 100 MHz/CDCl<sub>3</sub>/TMS; δ (ppm).

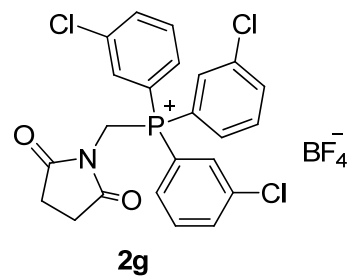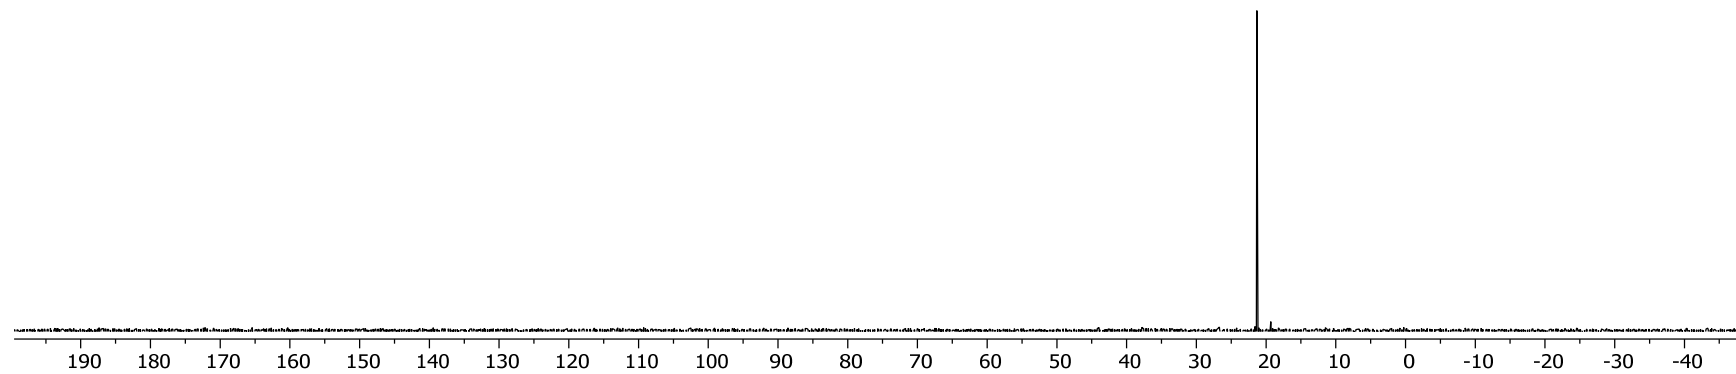

$^{31}\text{P}\{^1\text{H}\}$  NMR spectrum of 1-(*N*-succinimido)methyltris(3-chlorophenyl)phosphonium tetrafluoroborate (**2g**); 161.9 MHz/ $\text{CDCl}_3$ ;  $\delta$  (ppm).



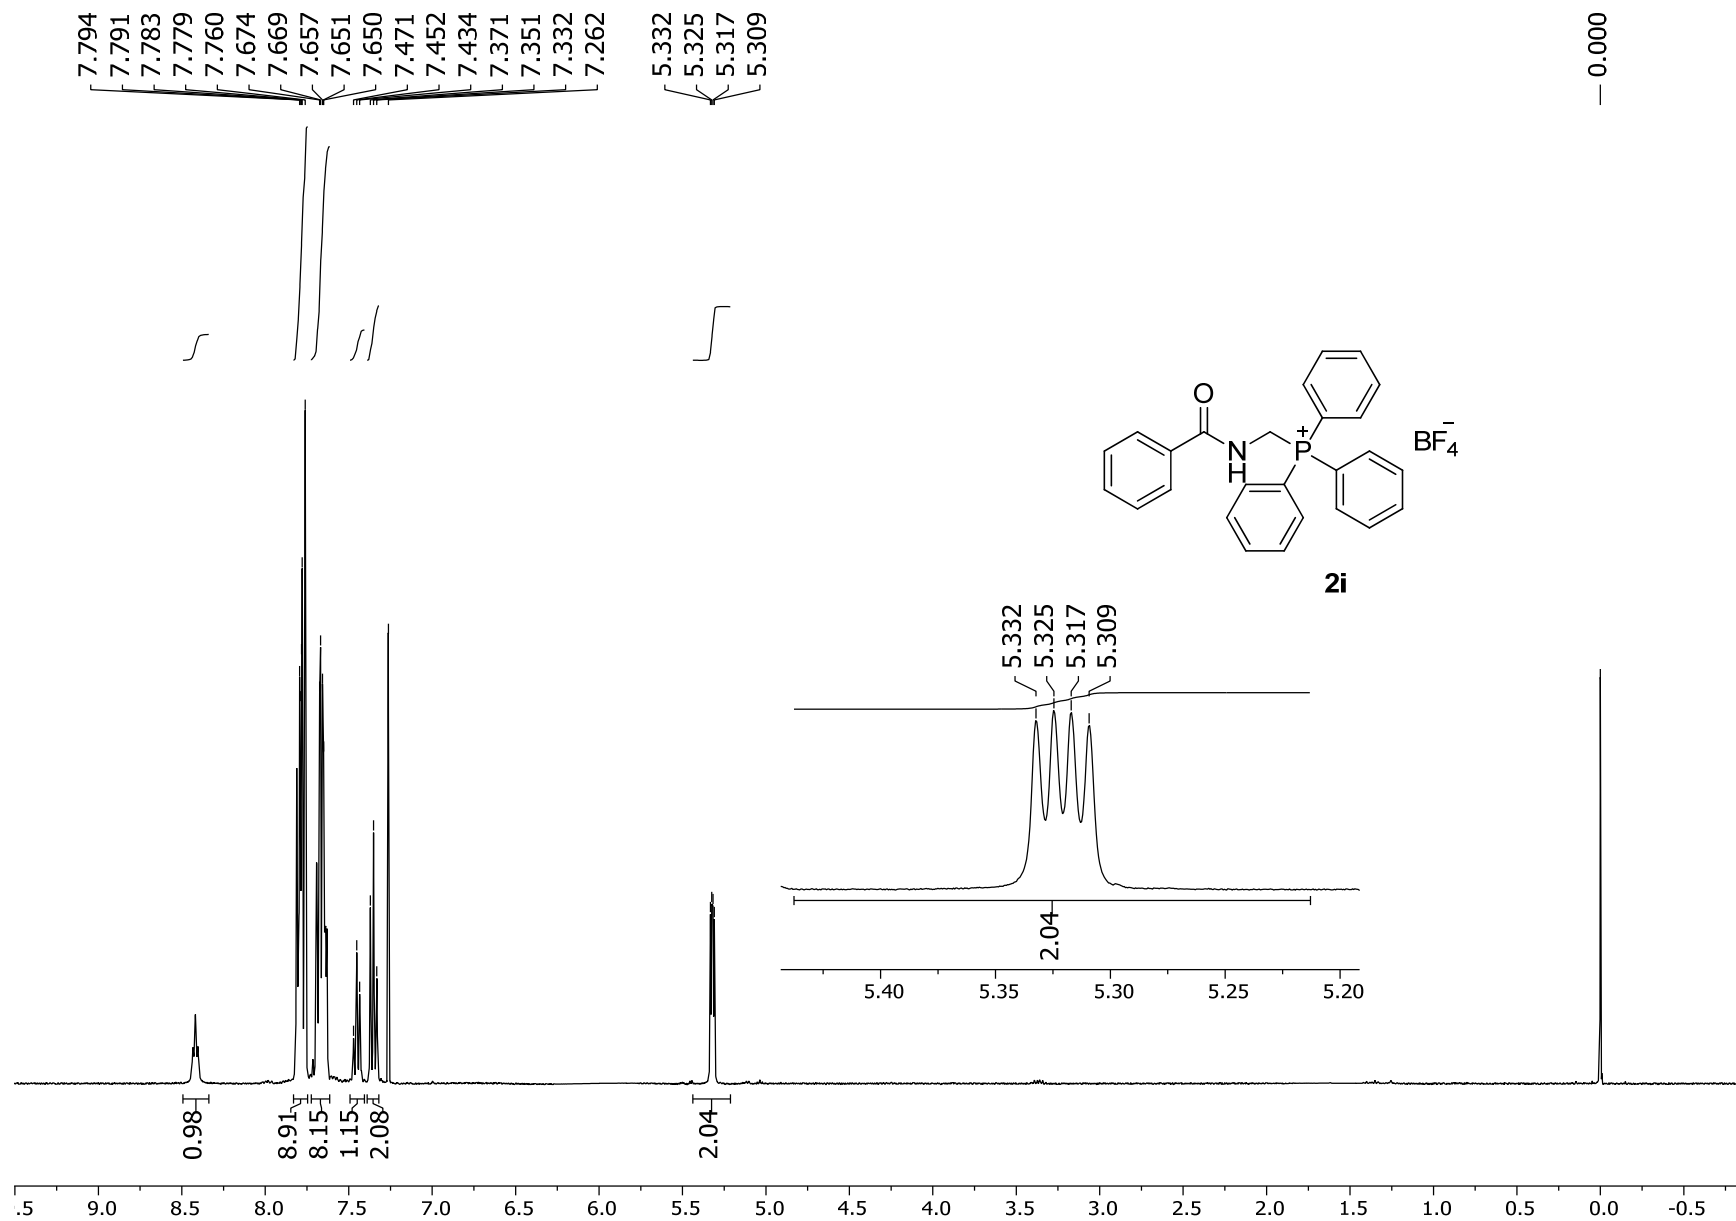

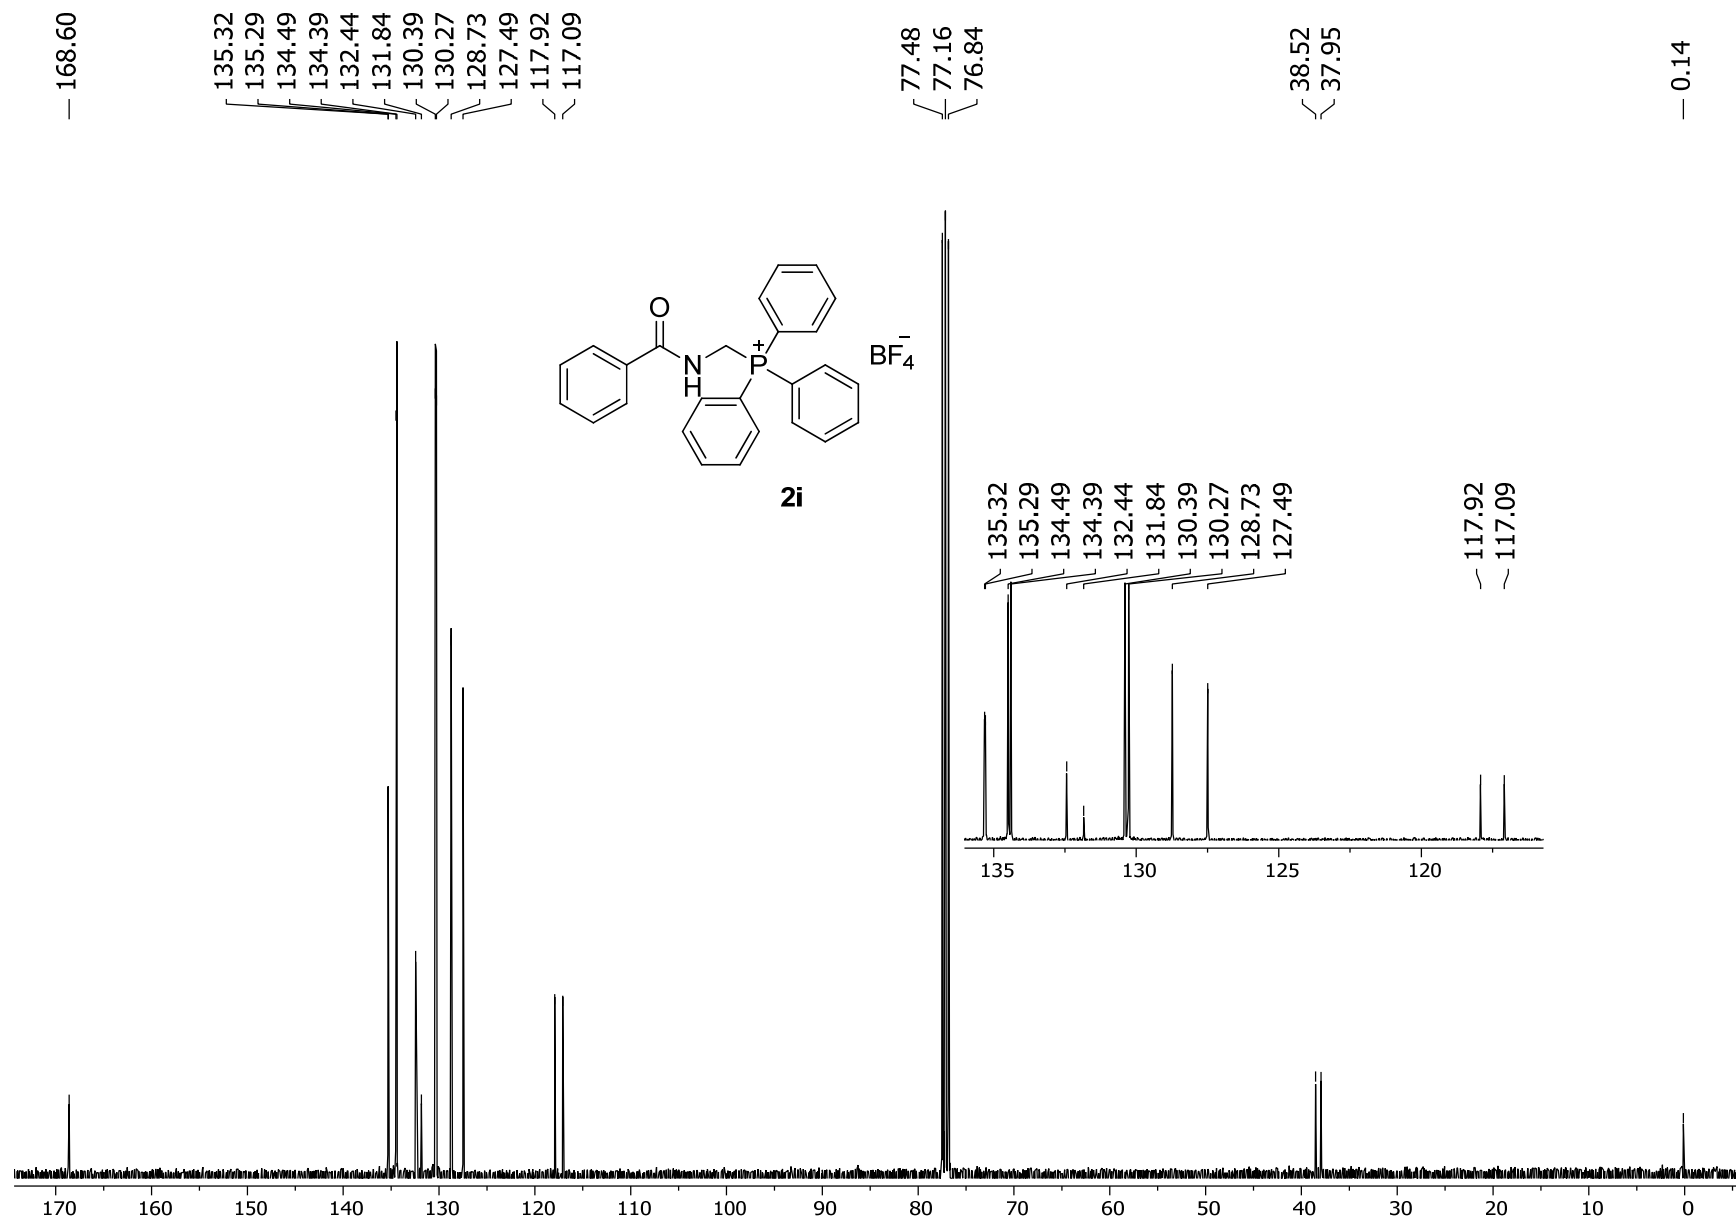

$^{13}\text{C}\{^1\text{H}\}$  NMR spectrum of (*N*-benzoylamino)methyltriphenylphosphonium tetrafluoroborate (**2i**); 100 MHz/ $\text{CDCl}_3$ /TMS;  $\delta$  (ppm).

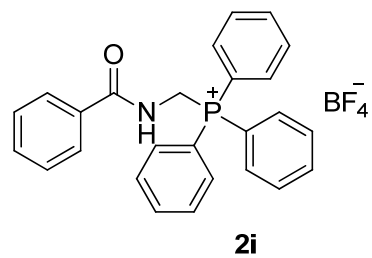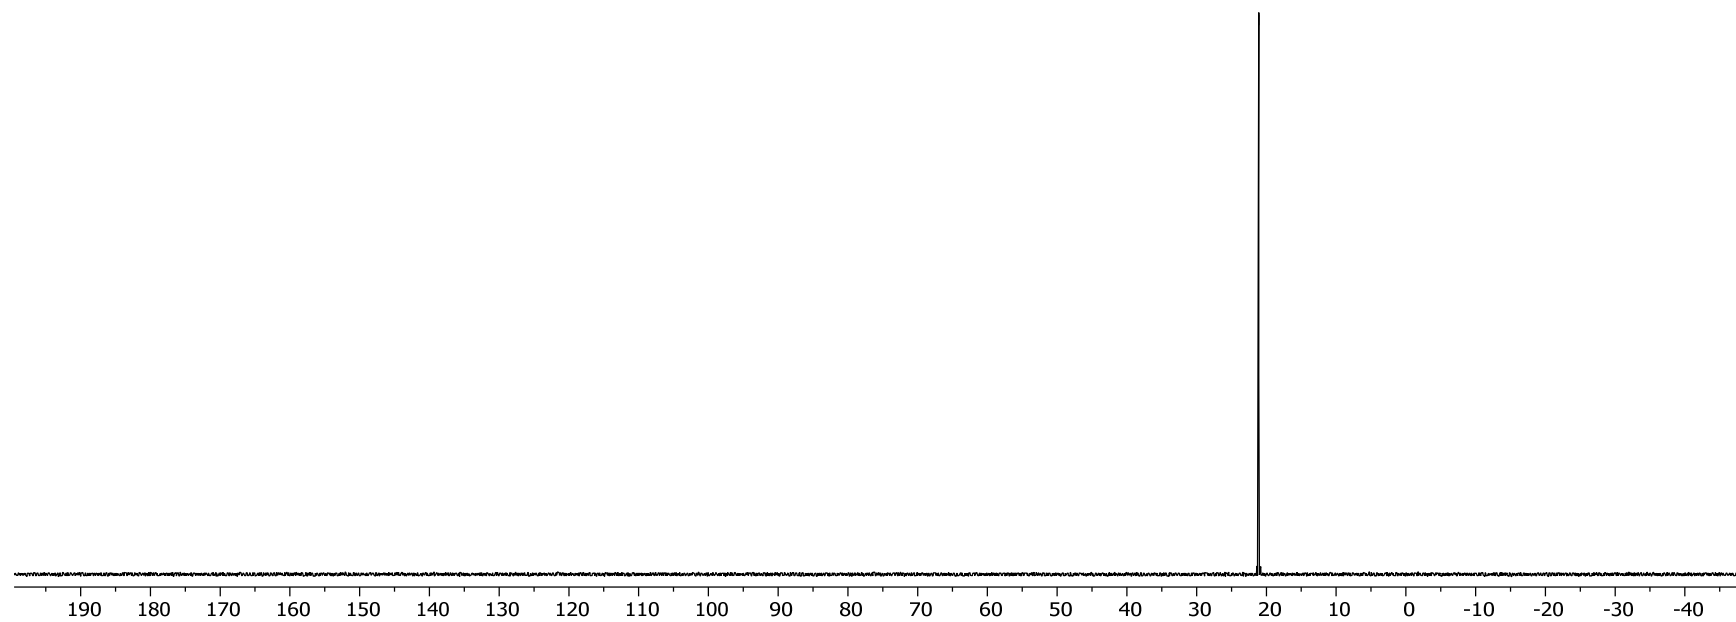

$^{31}\text{P}\{^1\text{H}\}$  NMR spectrum of (*N*-benzoylamino)methyltriphenylphosphonium tetrafluoroborate (**2i**); 161.9 MHz/ $\text{CDCl}_3$ ;  $\delta$  (ppm).

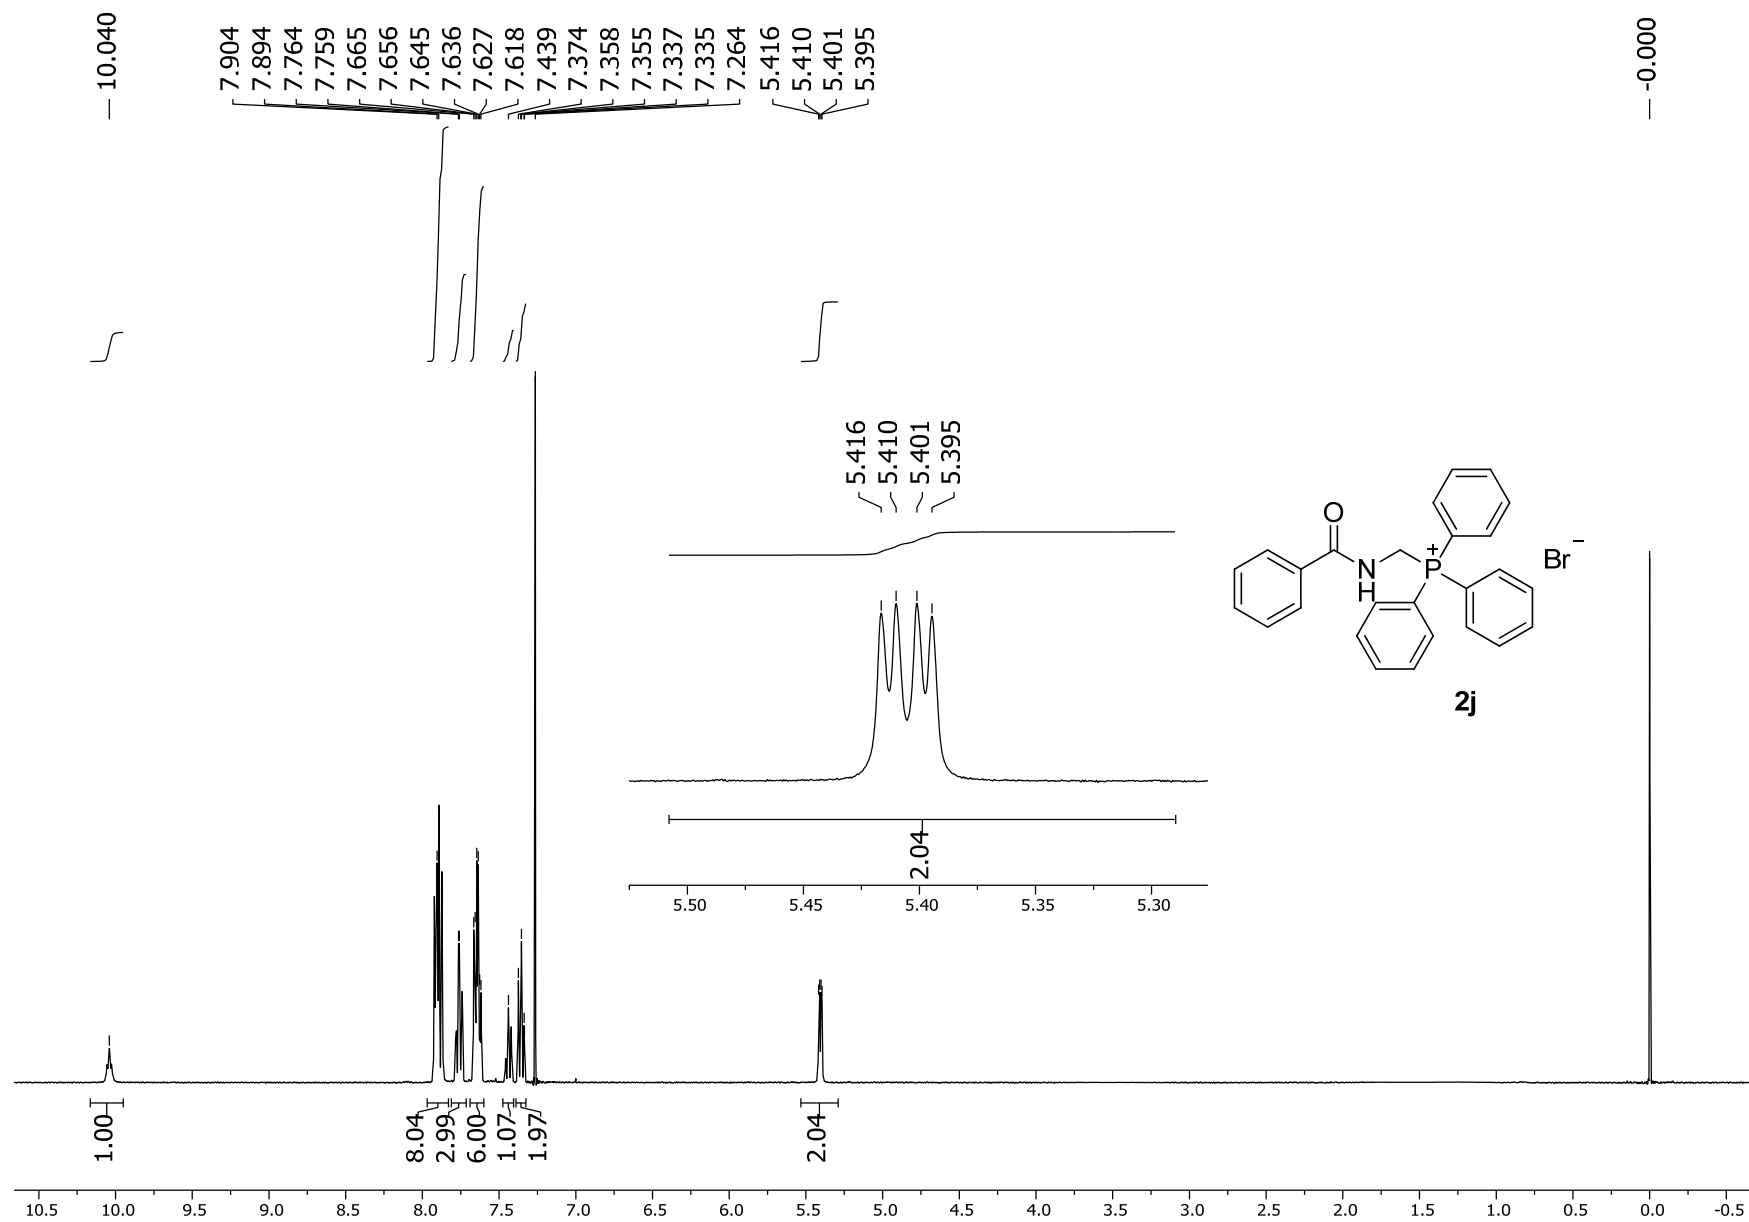

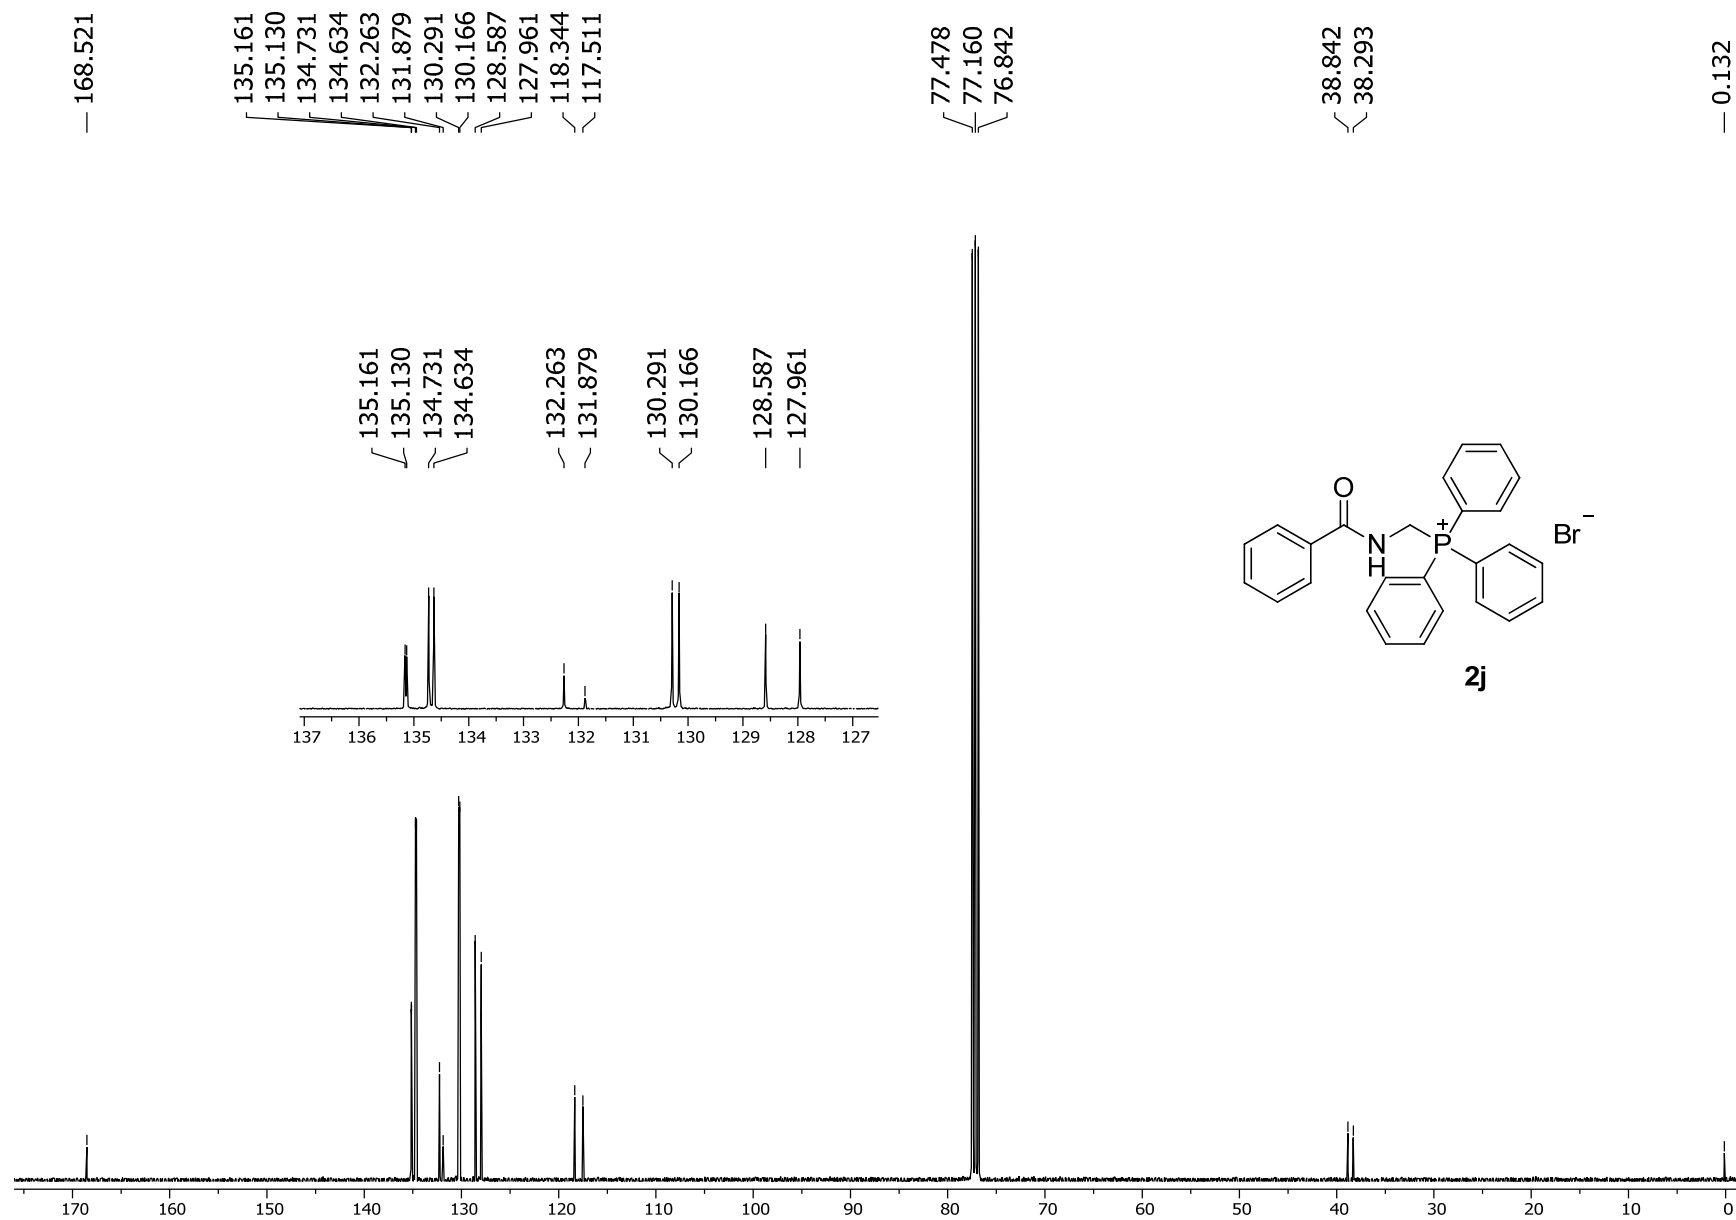

$^{13}\text{C}$  NMR spectrum of (*N*-benzoylamino)methyltriphenylphosphonium bromide (**2j**); 100 MHz/ $\text{CDCl}_3/\text{TMS}$ ;  $\delta$  (ppm).

H-30-31P  
H-30-31P

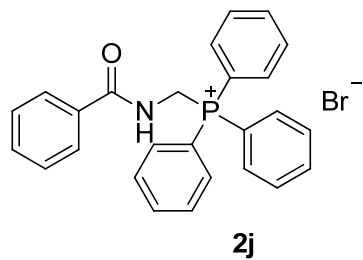

— 21.059

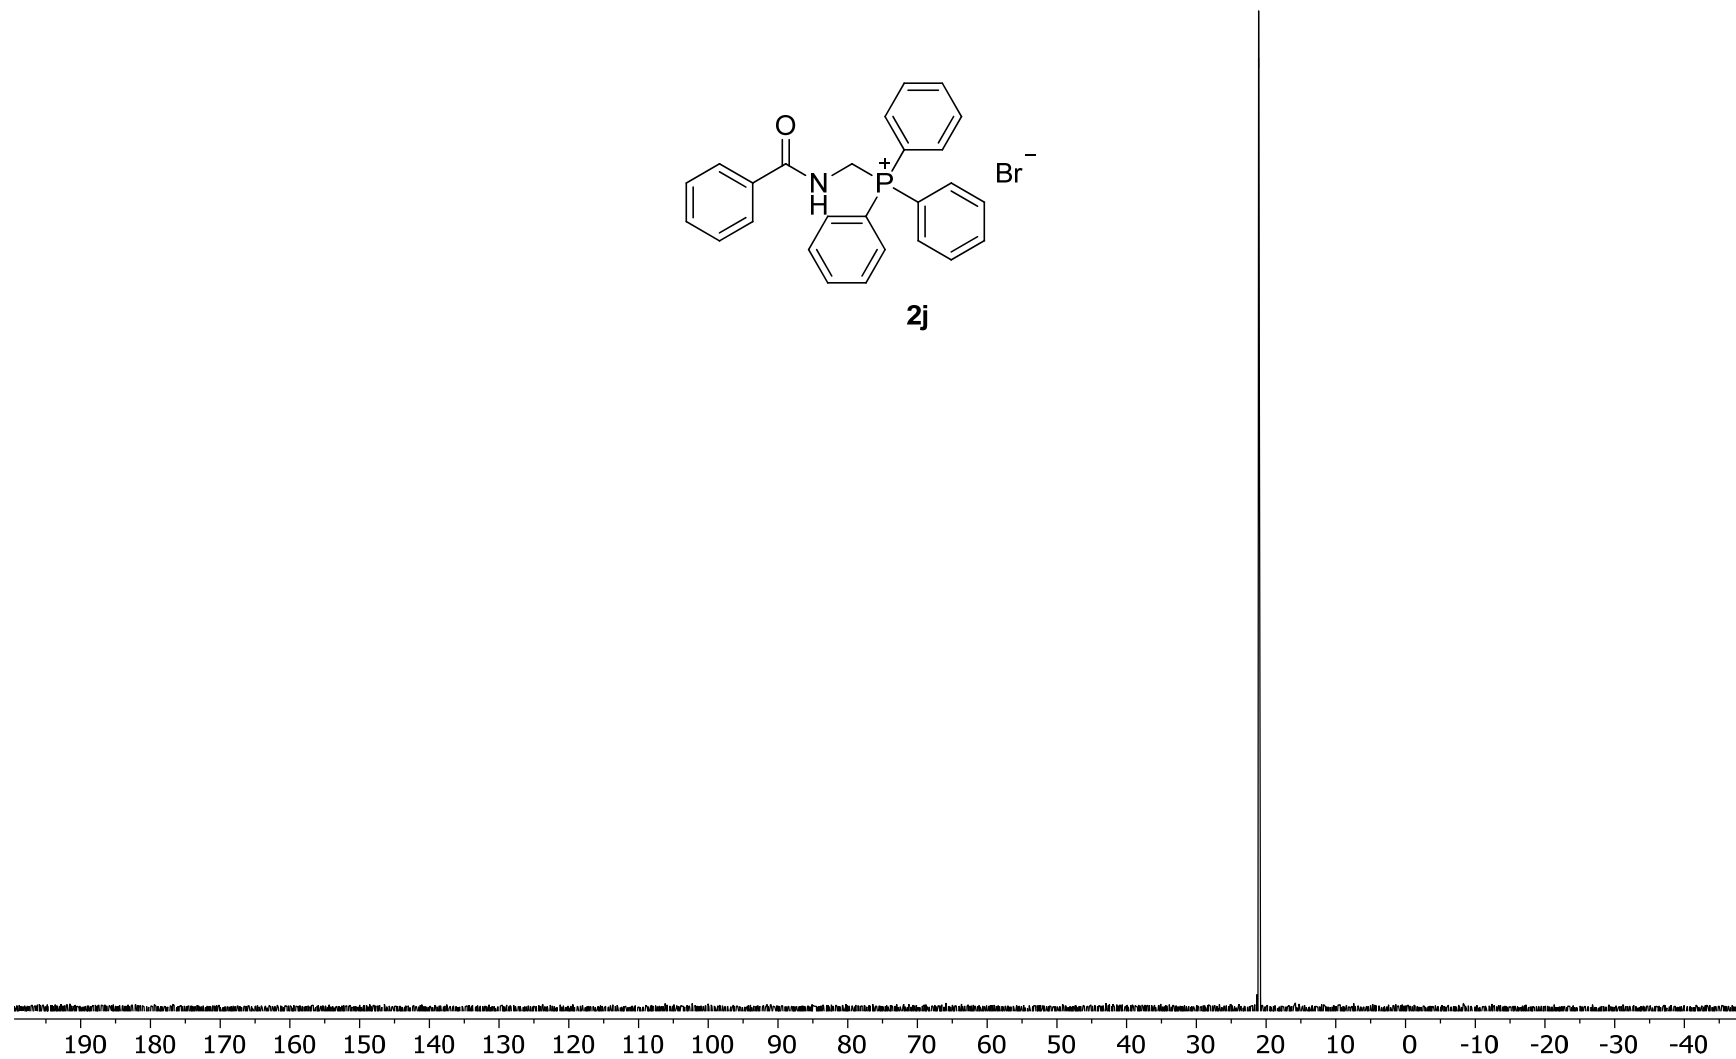

$^{31}\text{P}\{^1\text{H}\}$  NMR spectrum of (N-benzoylamino)methyltriphenylphosphonium bromide (**2j**); 161.9 MHz/ $\text{CDCl}_3$ ;  $\delta$  (ppm).

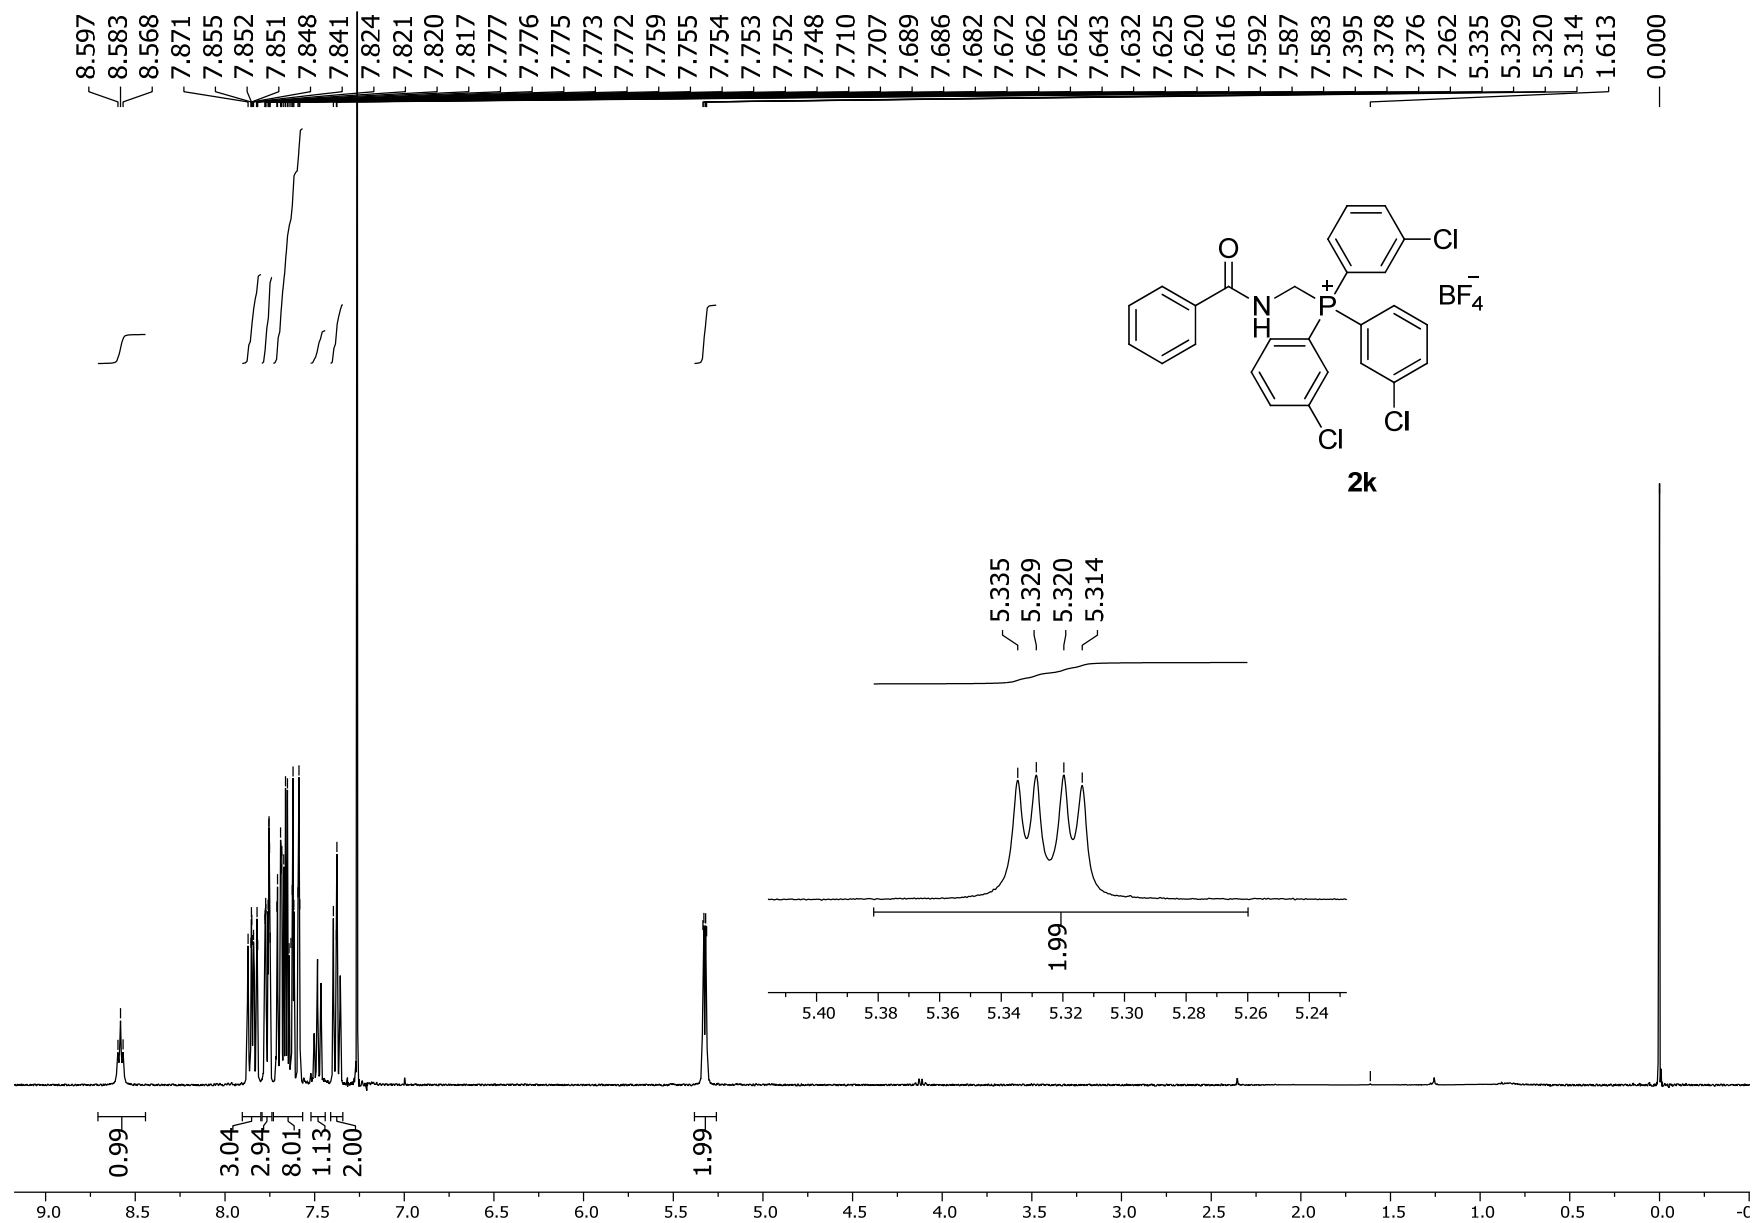

<sup>1</sup>H NMR spectrum of (*N*-benzoylamino)methyltris(3-chlorophenyl)phosphonium tetrafluoroborate (**2k**); 400 MHz/CDCl<sub>3</sub>/TMS; δ (ppm).



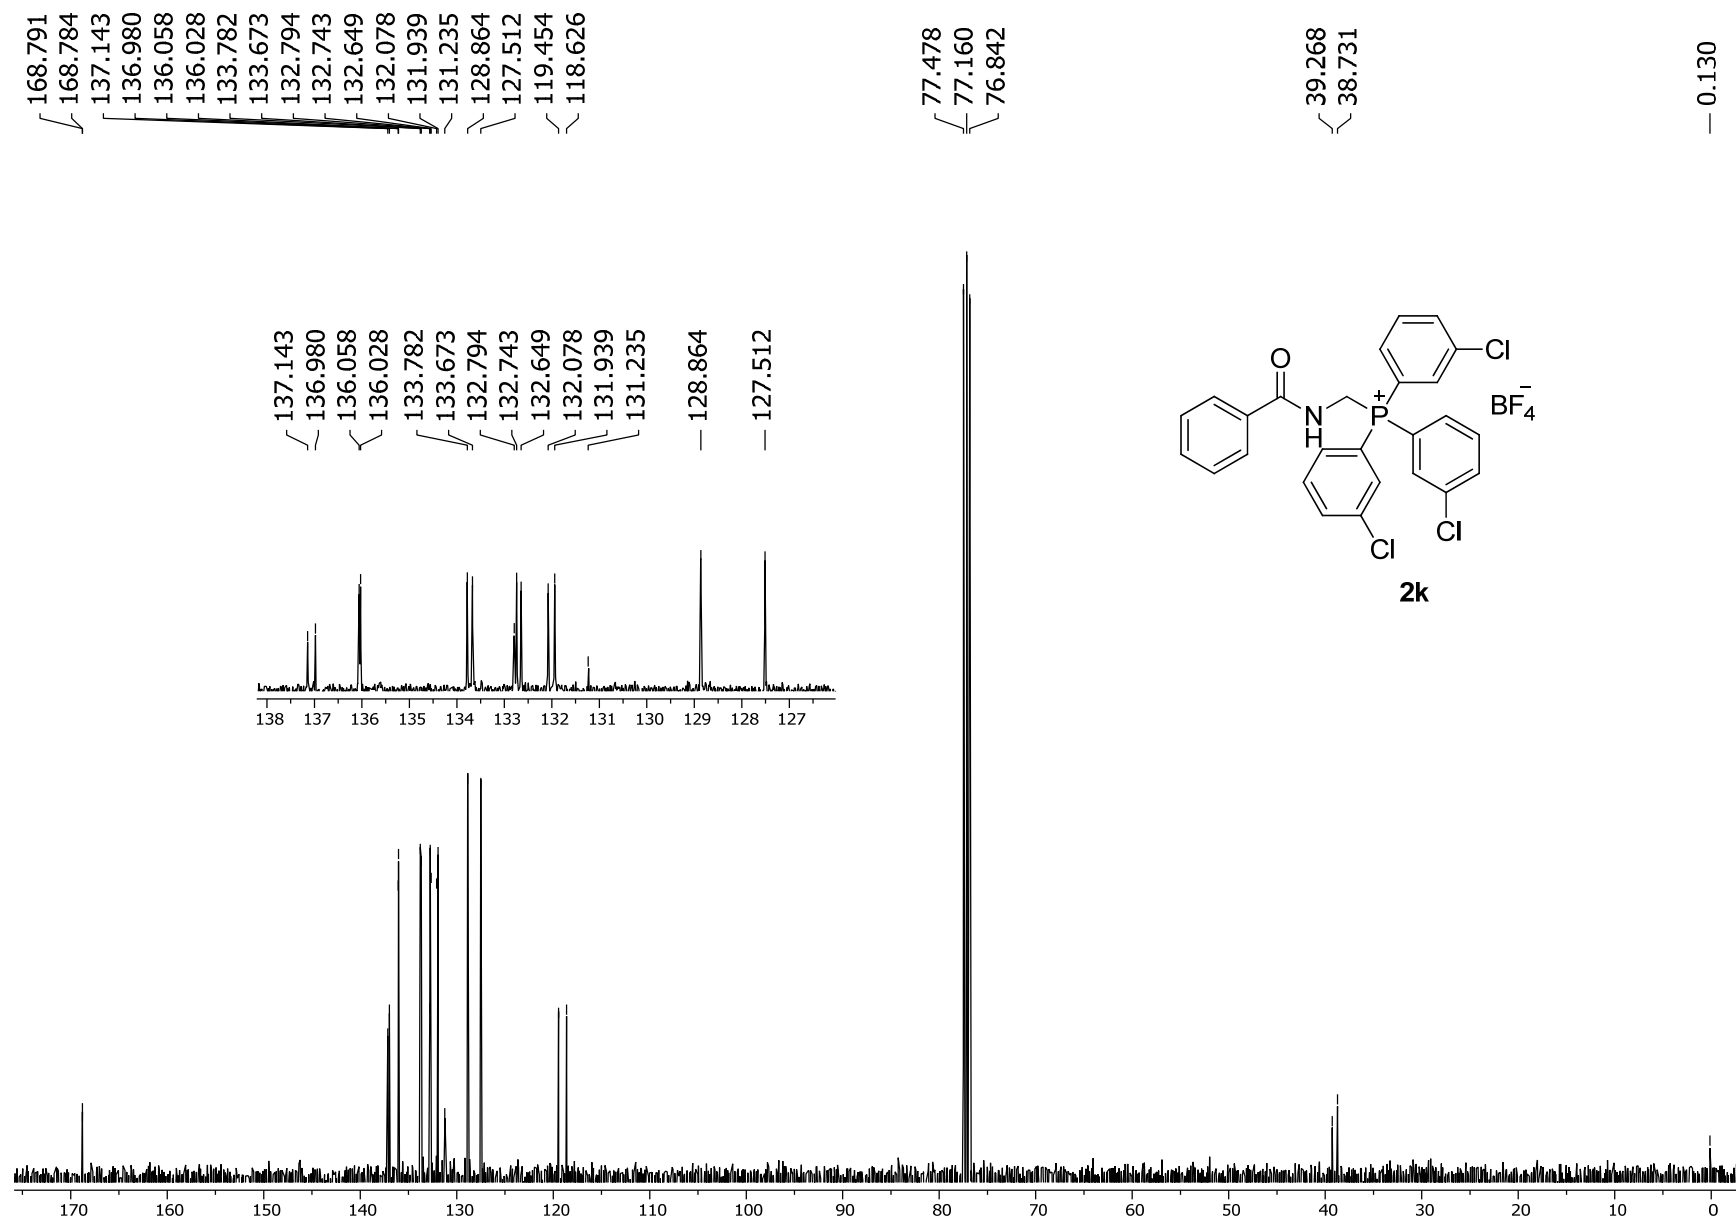

$^{13}\text{C}\{^1\text{H}\}$  NMR spectrum of (*N*-benzoylamino)methyltris(3-chlorophenyl)phosphonium tetrafluoroborate (**2k**); 100 MHz/ $\text{CDCl}_3/\text{TMS}$ ;  $\delta$  (ppm).

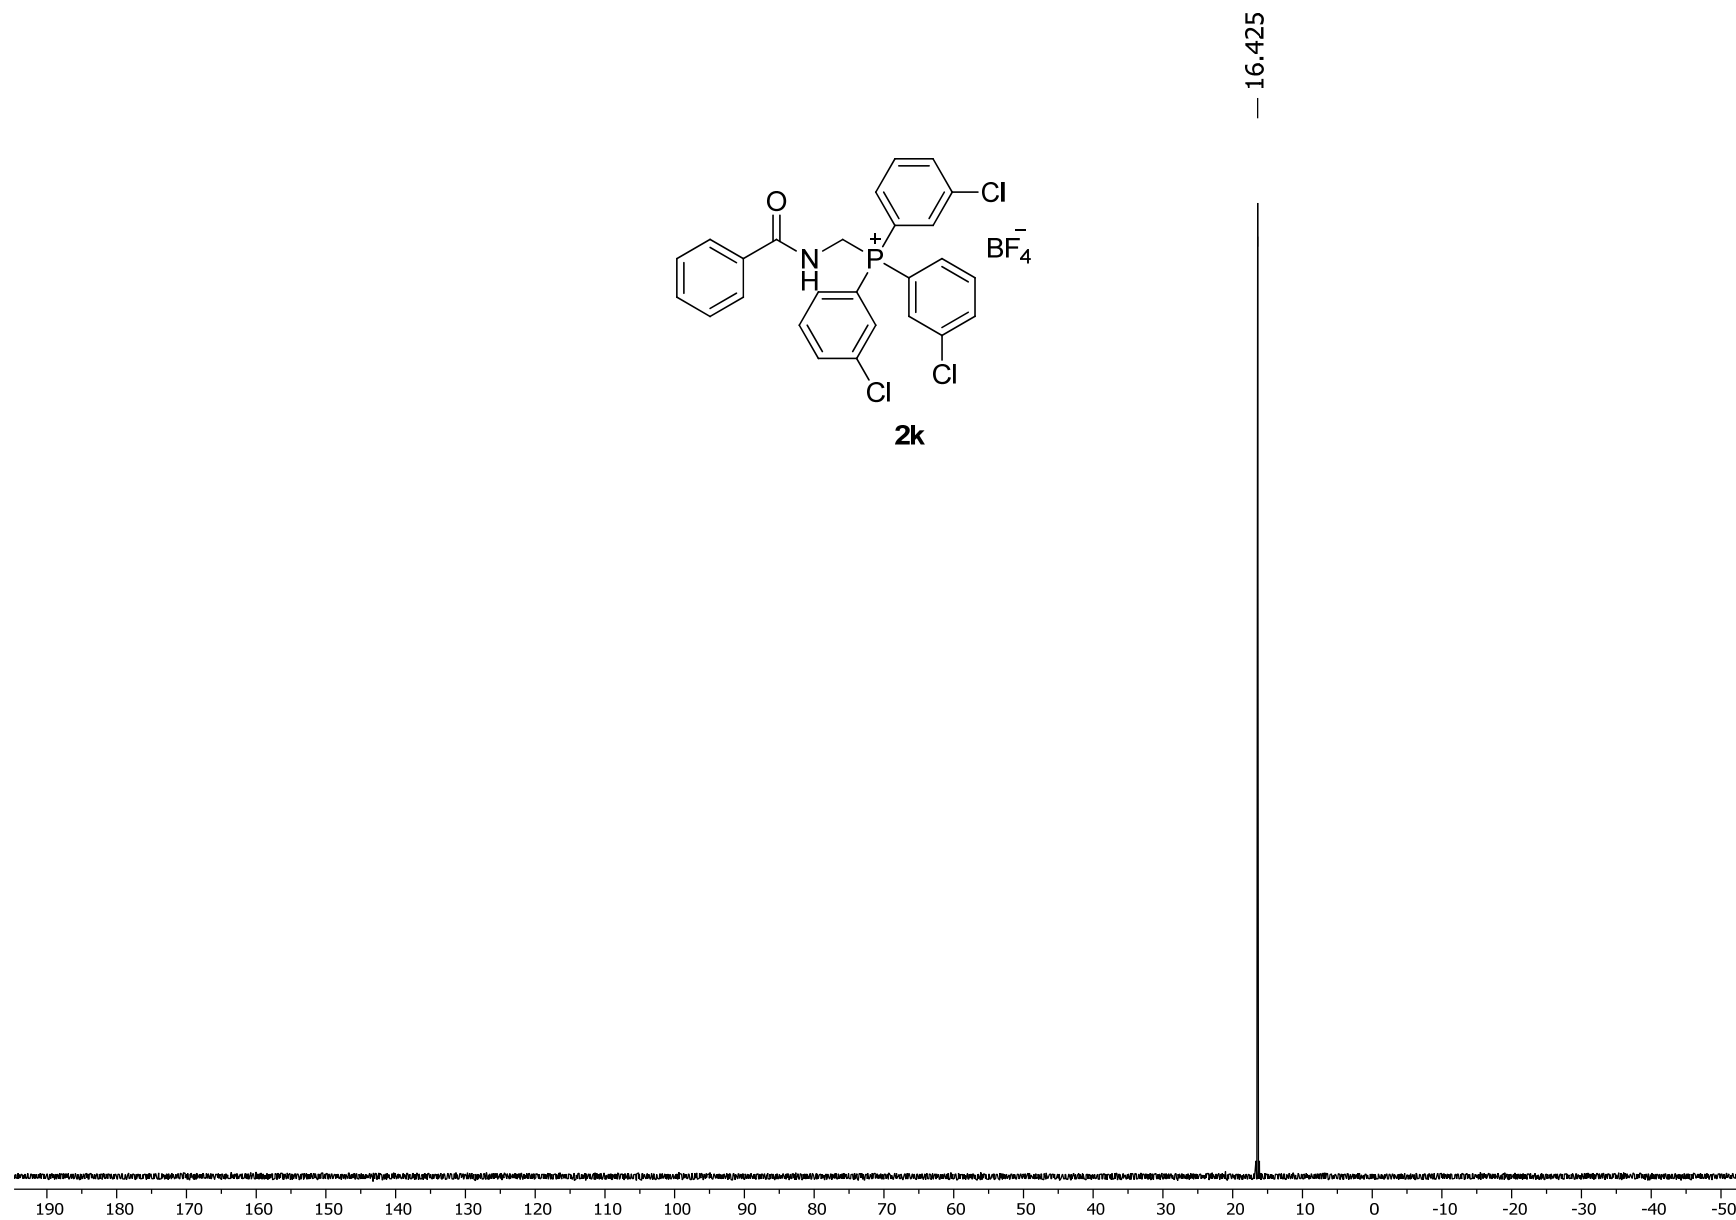

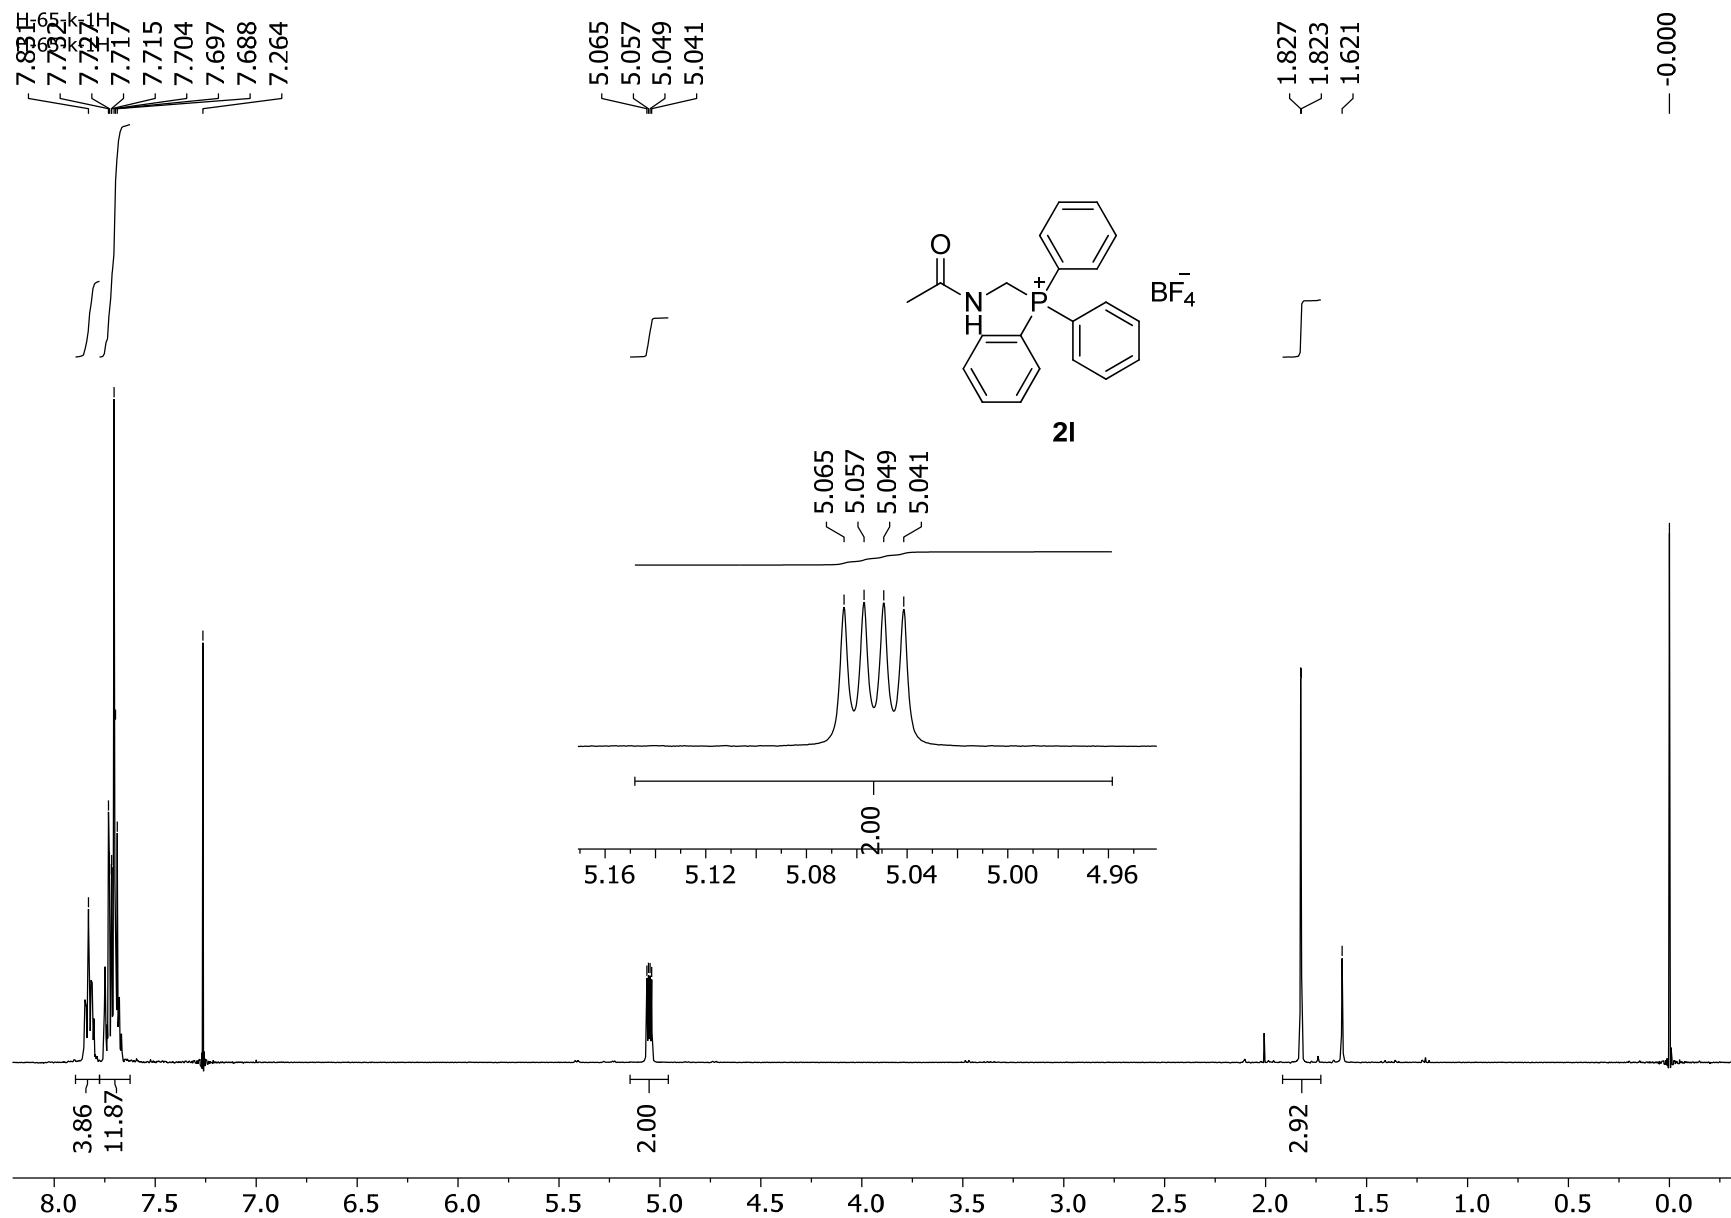

<sup>1</sup>H NMR spectrum of (*N*-acetylamino)methyltriphenylphosphonium tetrafluoroborate (**21**); 400 MHz/CDCl<sub>3</sub>/TMS; δ (ppm).

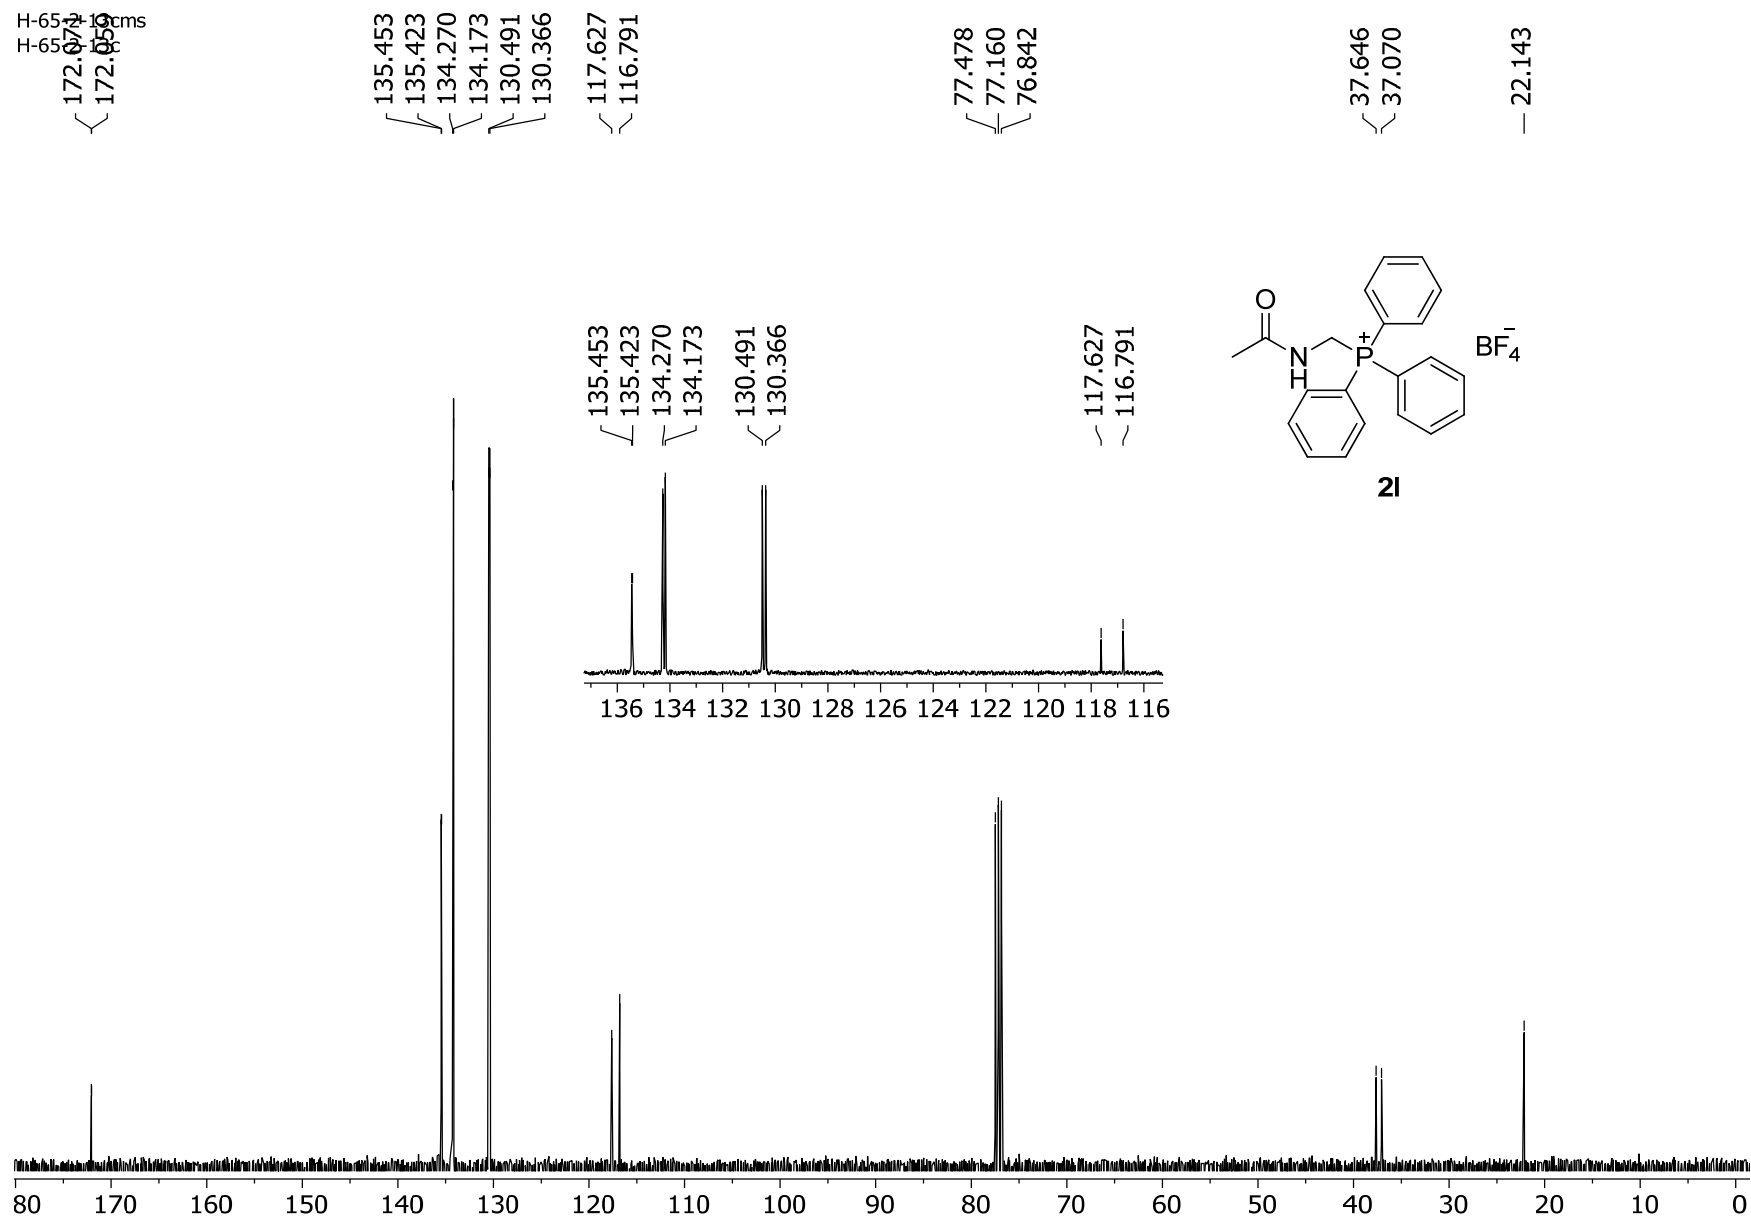

<sup>13</sup>C{<sup>1</sup>H} NMR spectrum of (N-acetylamino)methyltriphenylphosphonium tetrafluoroborate (**21**); 100 MHz/CDCl<sub>3</sub>/TMS; δ (ppm).

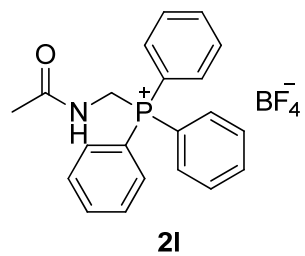

— 20.760

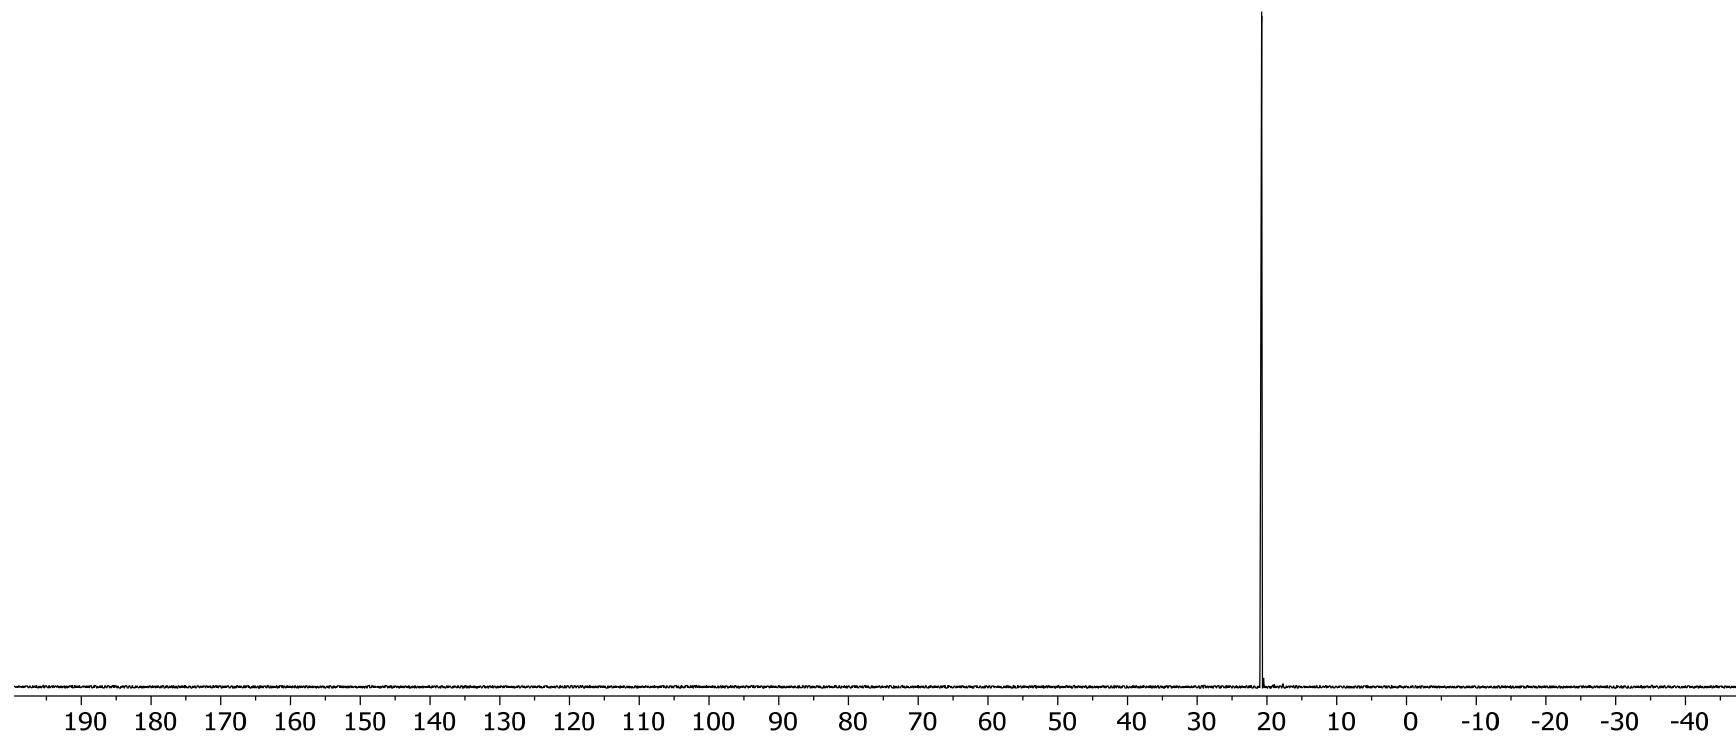

$^{31}\text{P}\{^1\text{H}\}$  NMR spectrum of (*N*-acetylamino)methyltriphenylphosphonium tetrafluoroborate (**21**); 161.9 MHz/ $\text{CDCl}_3$ ;  $\delta$  (ppm).

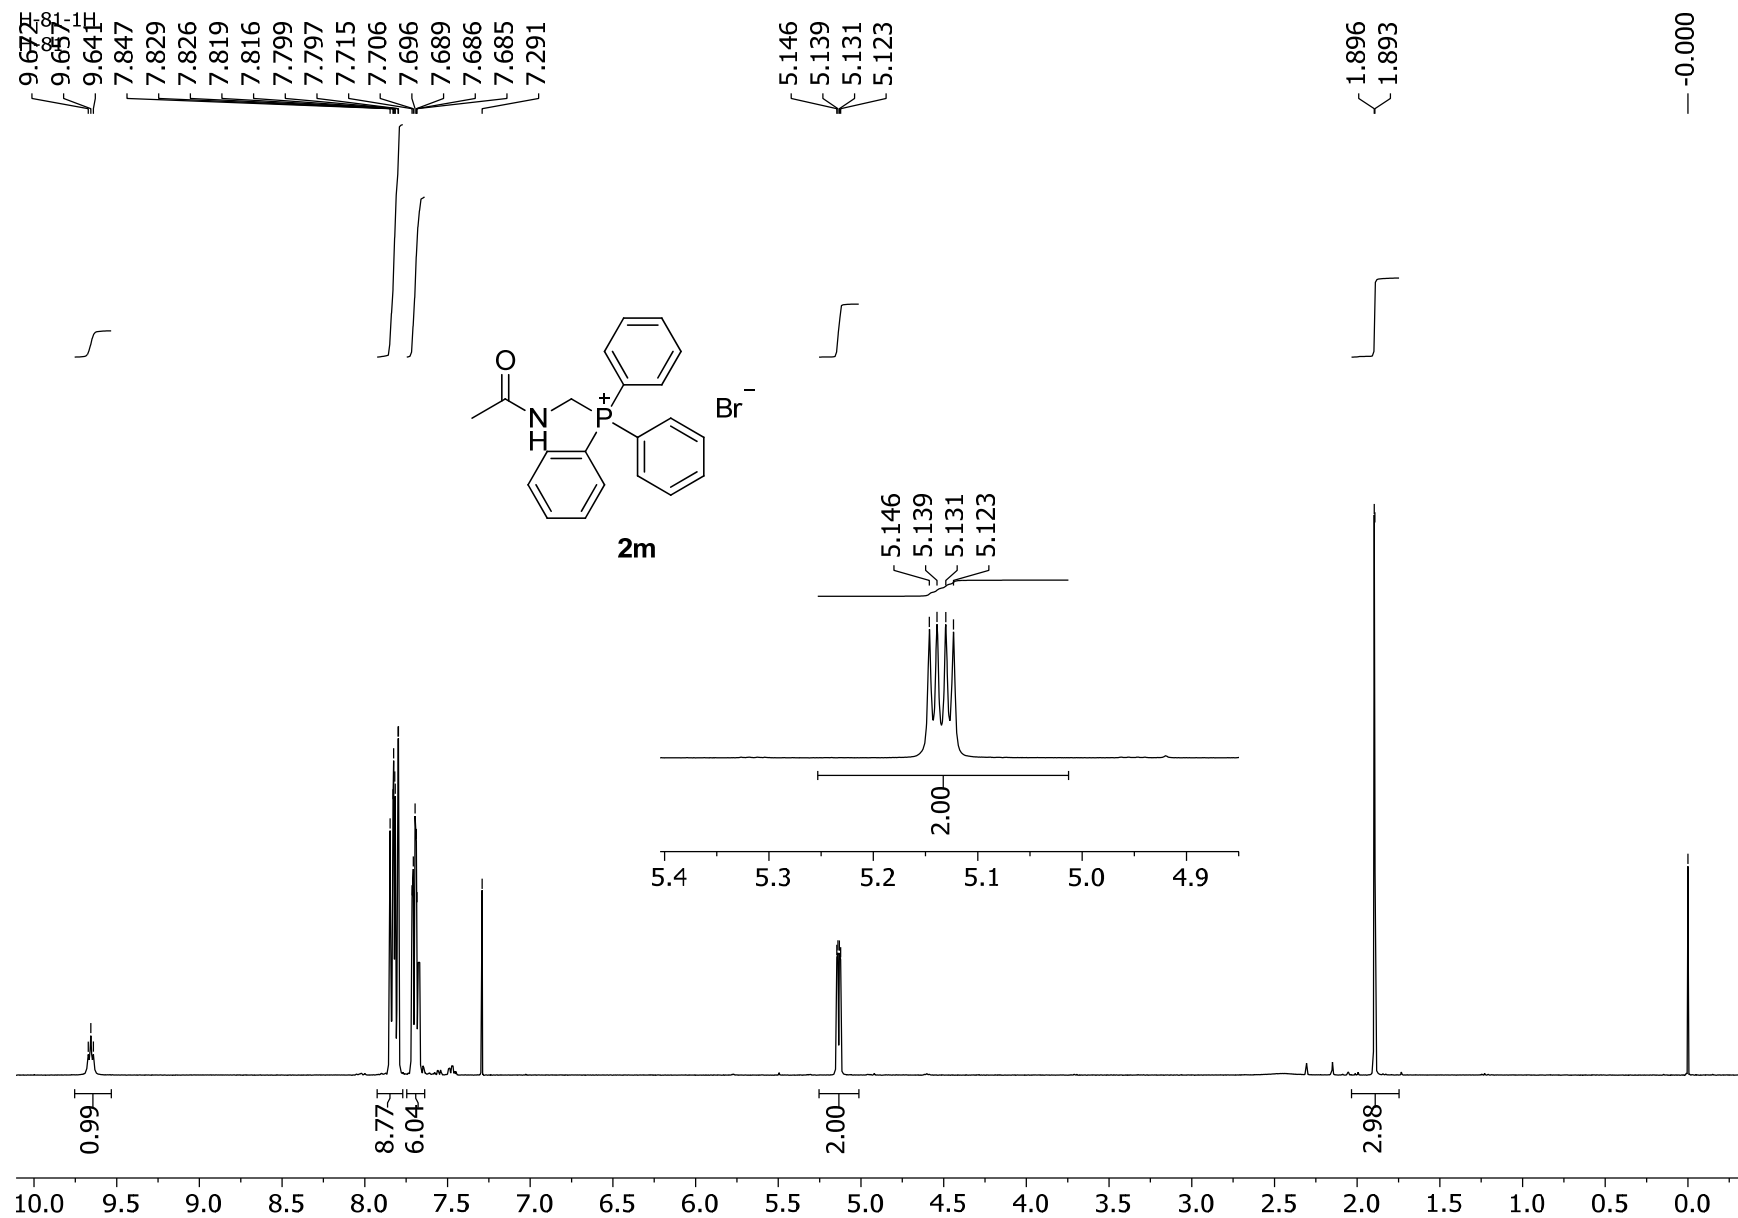

$^1\text{H}$  NMR spectrum of (*N*-acetylamino)methyltriphenylphosphonium bromide (**2m**); 400 MHz/ $\text{CDCl}_3$ /TMS;  $\delta$  (ppm).

H-81.33 the\_best  
H-81.33

172.208  
172.194

135.290  
135.259  
134.487  
134.390  
130.370  
130.245

117.943  
117.108

77.477  
77.159  
76.841

37.869  
37.304

22.564  
22.560

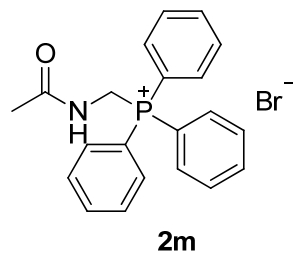

135.290  
135.259  
134.487  
134.390  
130.370  
130.245

117.943  
117.108

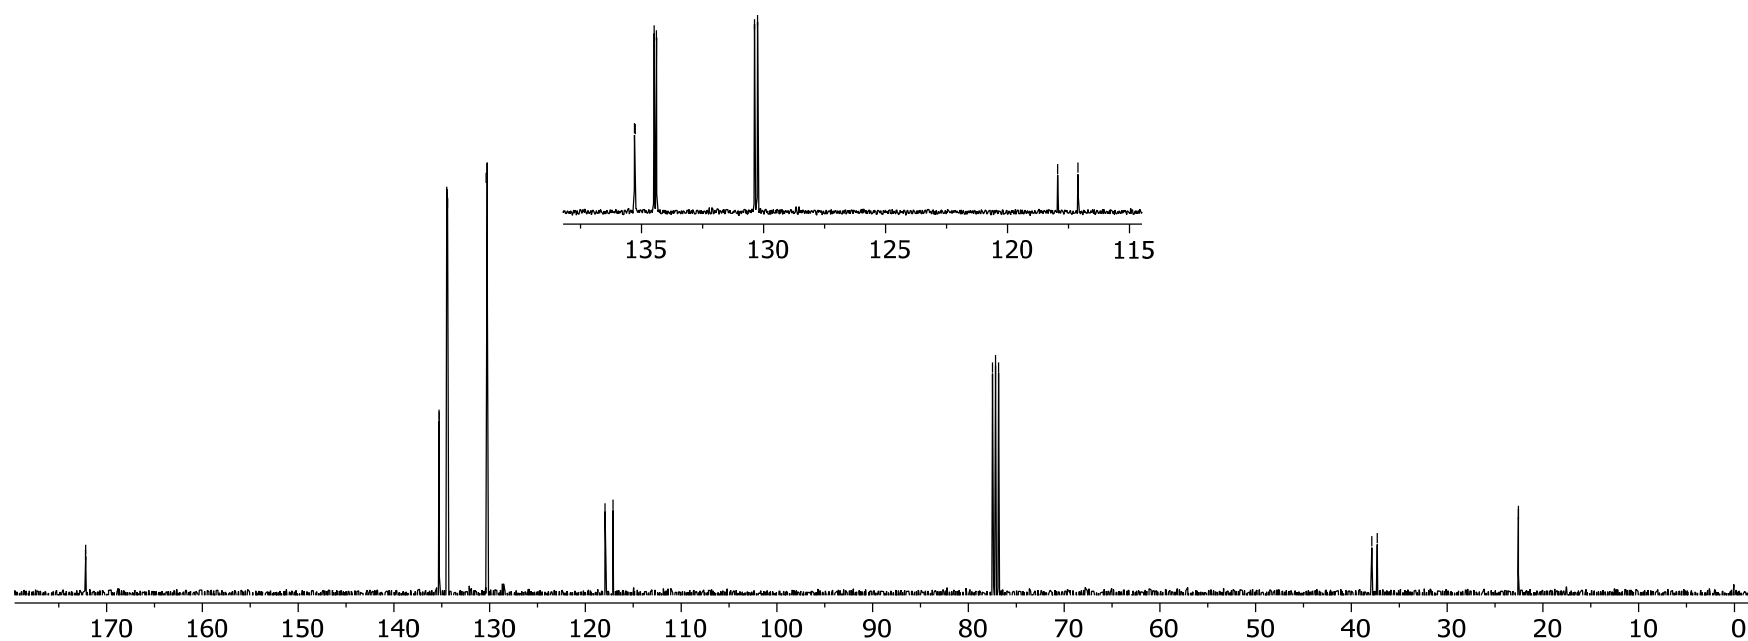

$^{13}\text{C}\{^1\text{H}\}$  NMR spectrum of (N-acetylamino)methyltriphenylphosphonium bromide (**2m**); 100 MHz/ $\text{CDCl}_3$ /TMS;  $\delta$  (ppm).

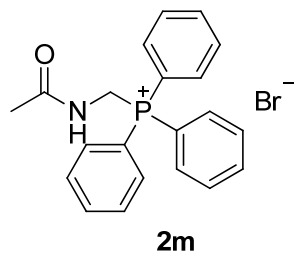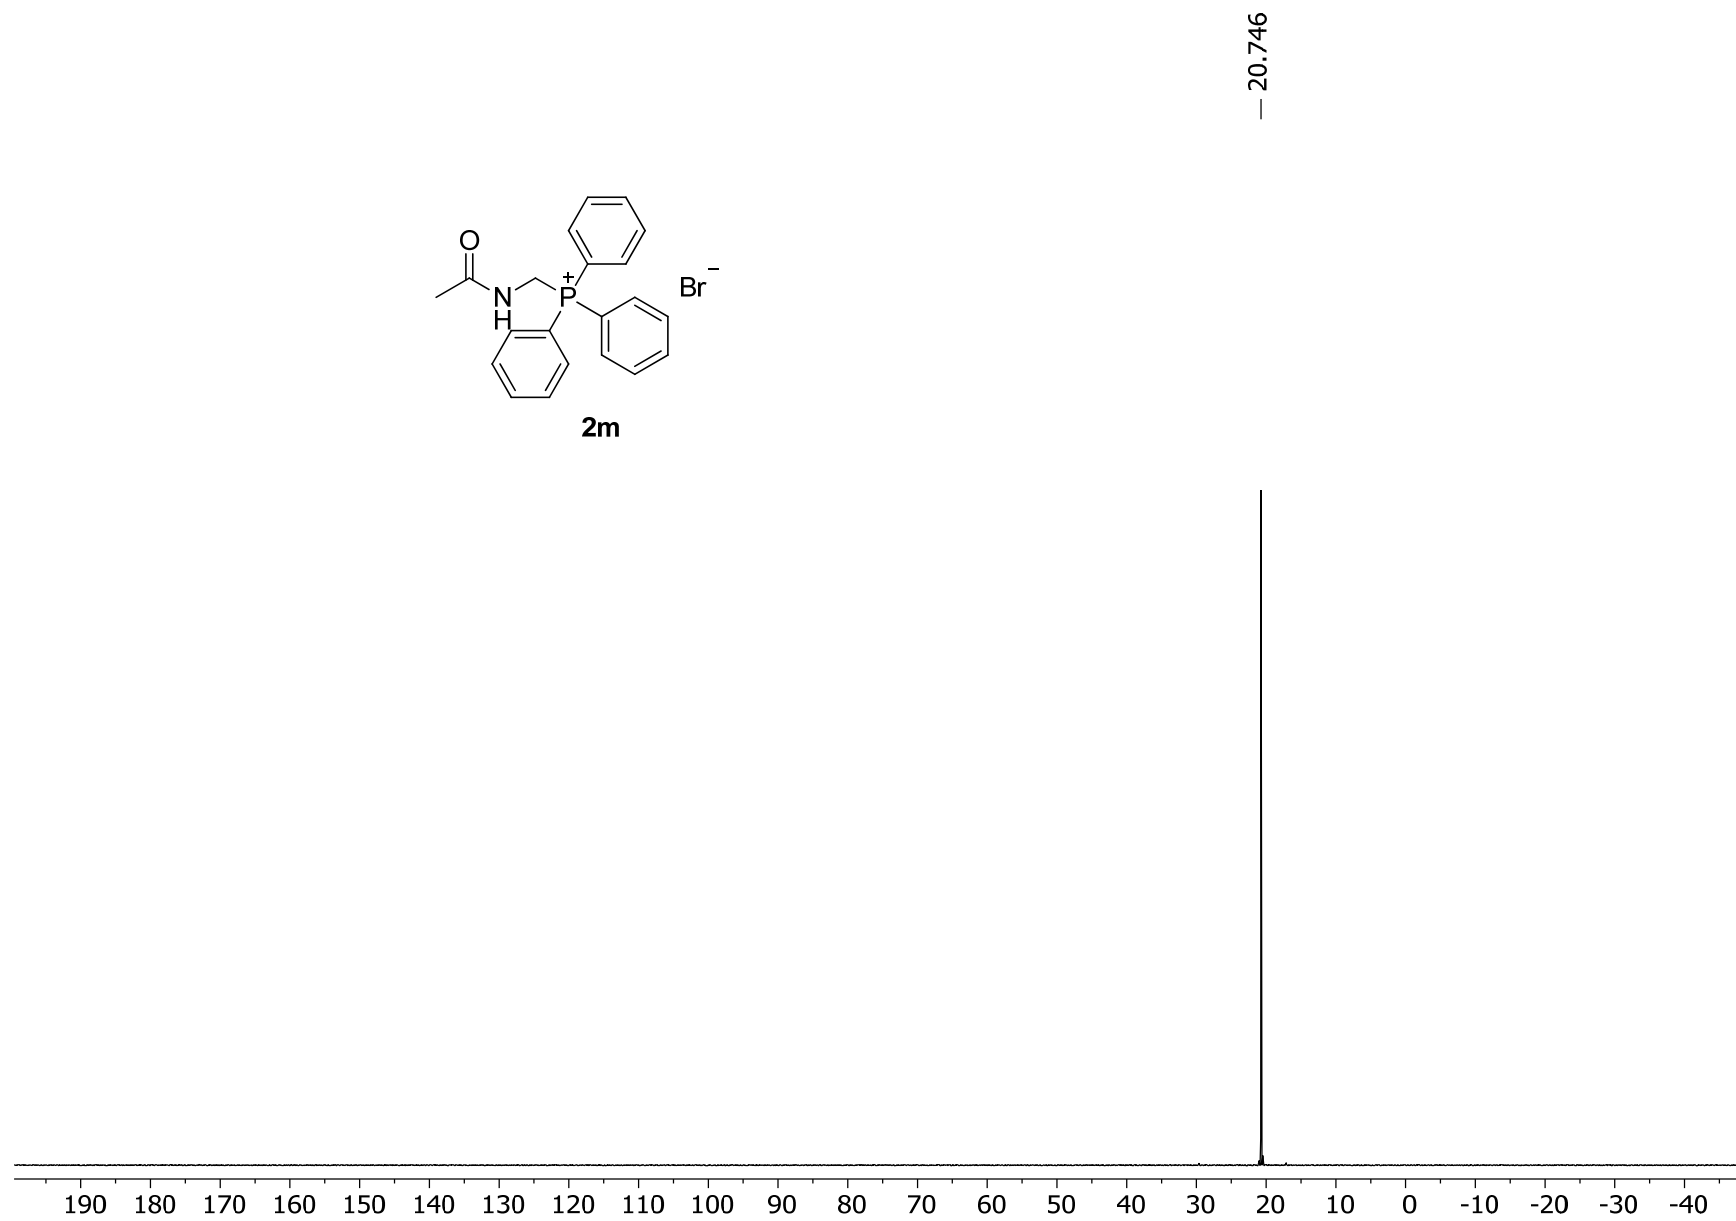

$^{31}\text{P}\{^1\text{H}\}$  NMR spectrum of (*N*-acetylamino)methyltriphenylphosphonium bromide (**2m**); 161.9 MHz/ $\text{CDCl}_3$ ;  $\delta$  (ppm).



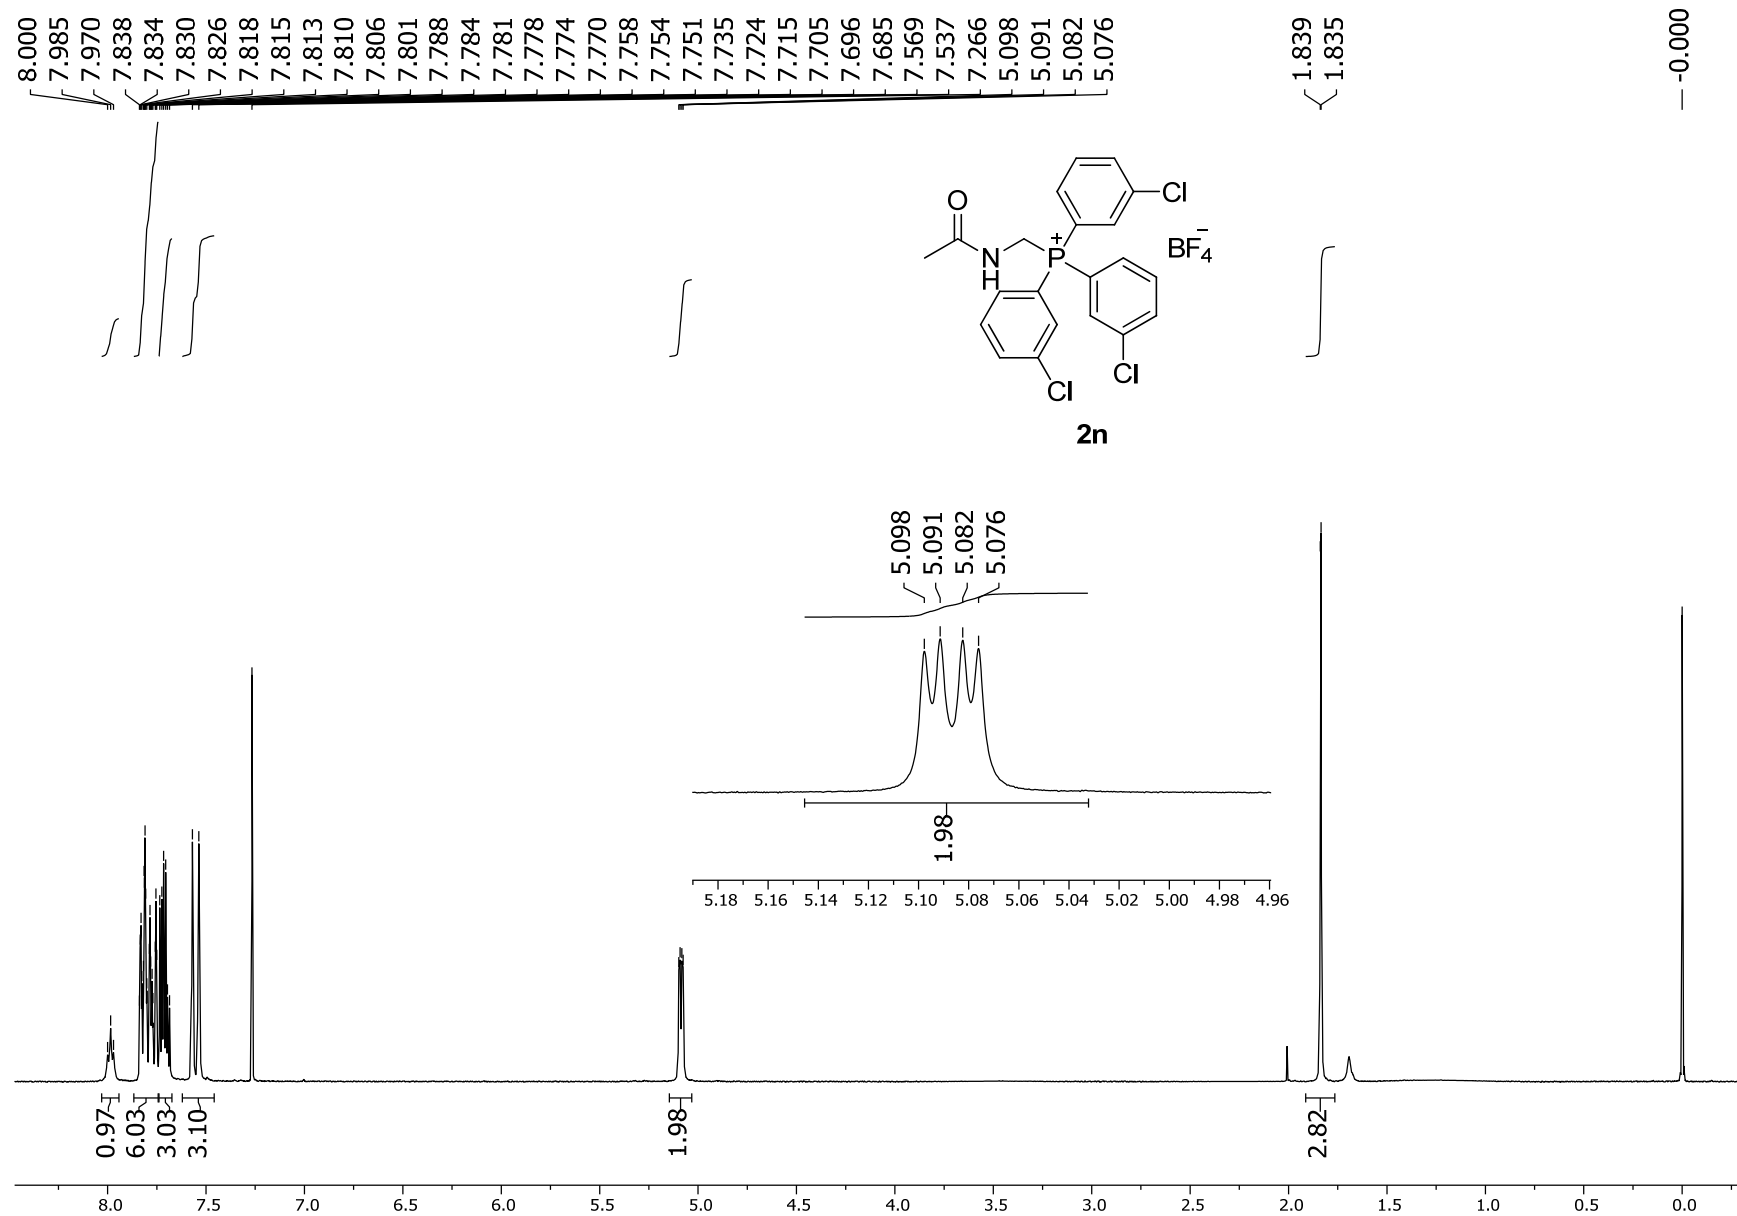

<sup>1</sup>H NMR spectrum of (*N*-acetylamino)methyltris(3-chlorophenyl)phosphonium tetrafluoroborate (**2n**); 400 MHz/CDCl<sub>3</sub>/TMS; δ (ppm).

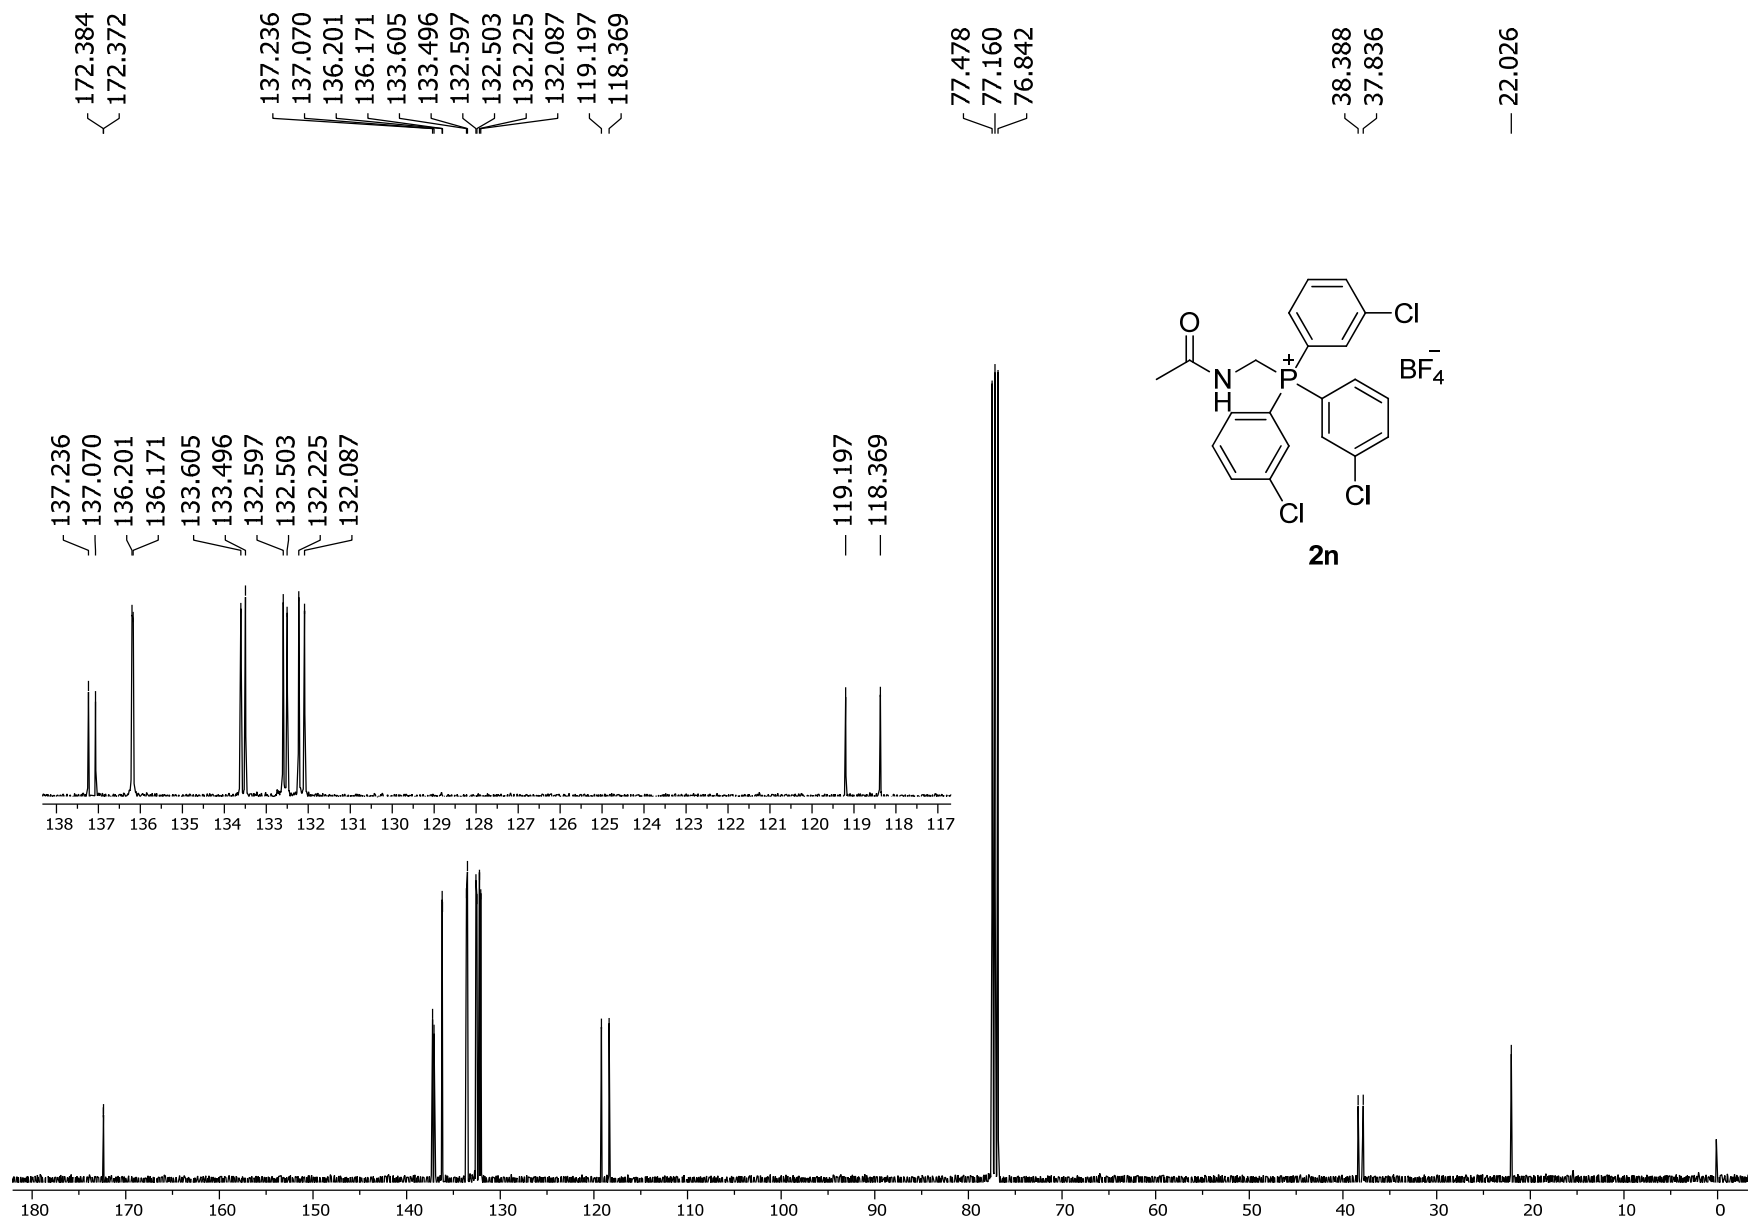

<sup>13</sup>C{<sup>1</sup>H} NMR spectrum of (*N*-acetylamino)methyltris(3-chlorophenyl)phosphonium tetrafluoroborate (**2n**); 100 MHz/CDCl<sub>3</sub>/TMS; δ (ppm).

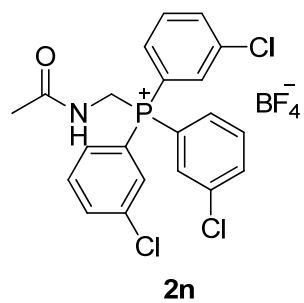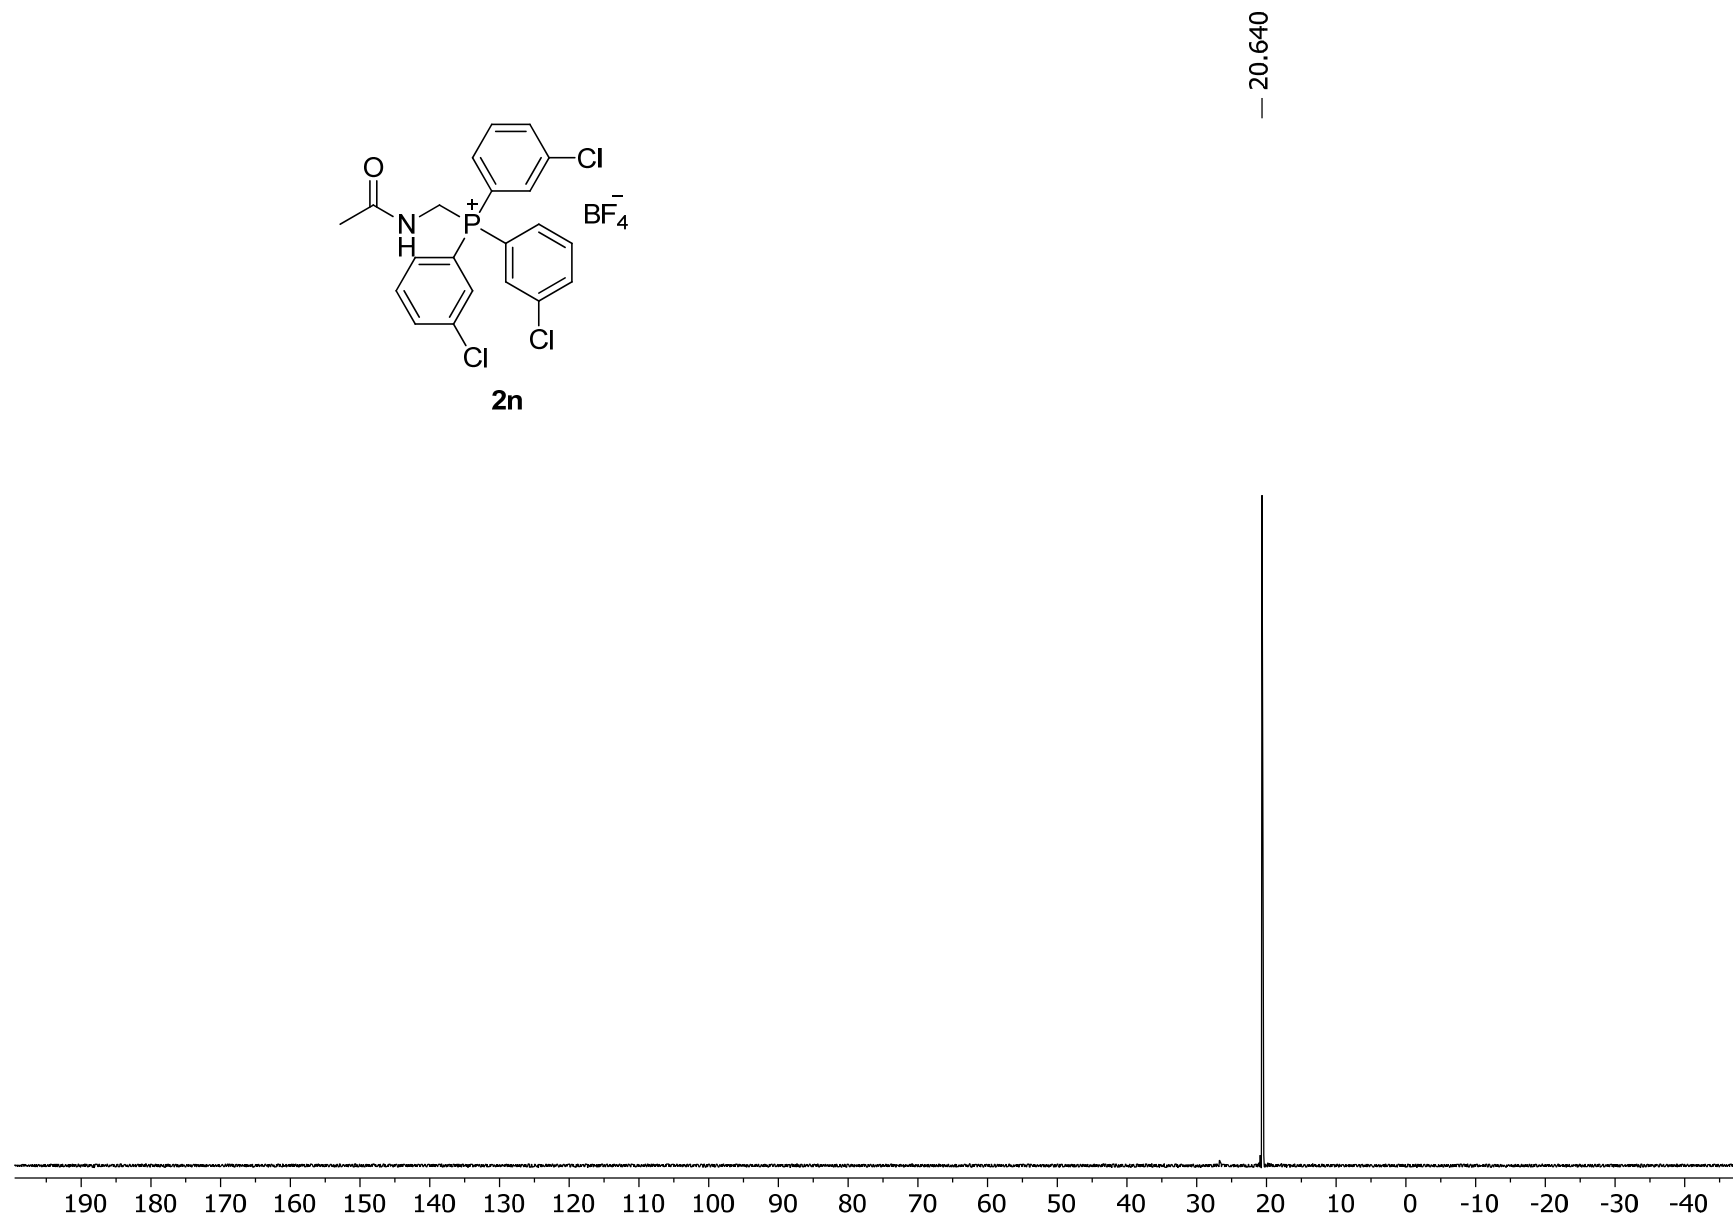

$^{31}\text{P}\{^1\text{H}\}$  NMR spectrum of (*N*-acetylamino)methyltris(3-chlorophenyl)phosphonium tetrafluoroborate (**2n**); 161.9 MHz/ $\text{CDCl}_3$ ;  $\delta$  (ppm).

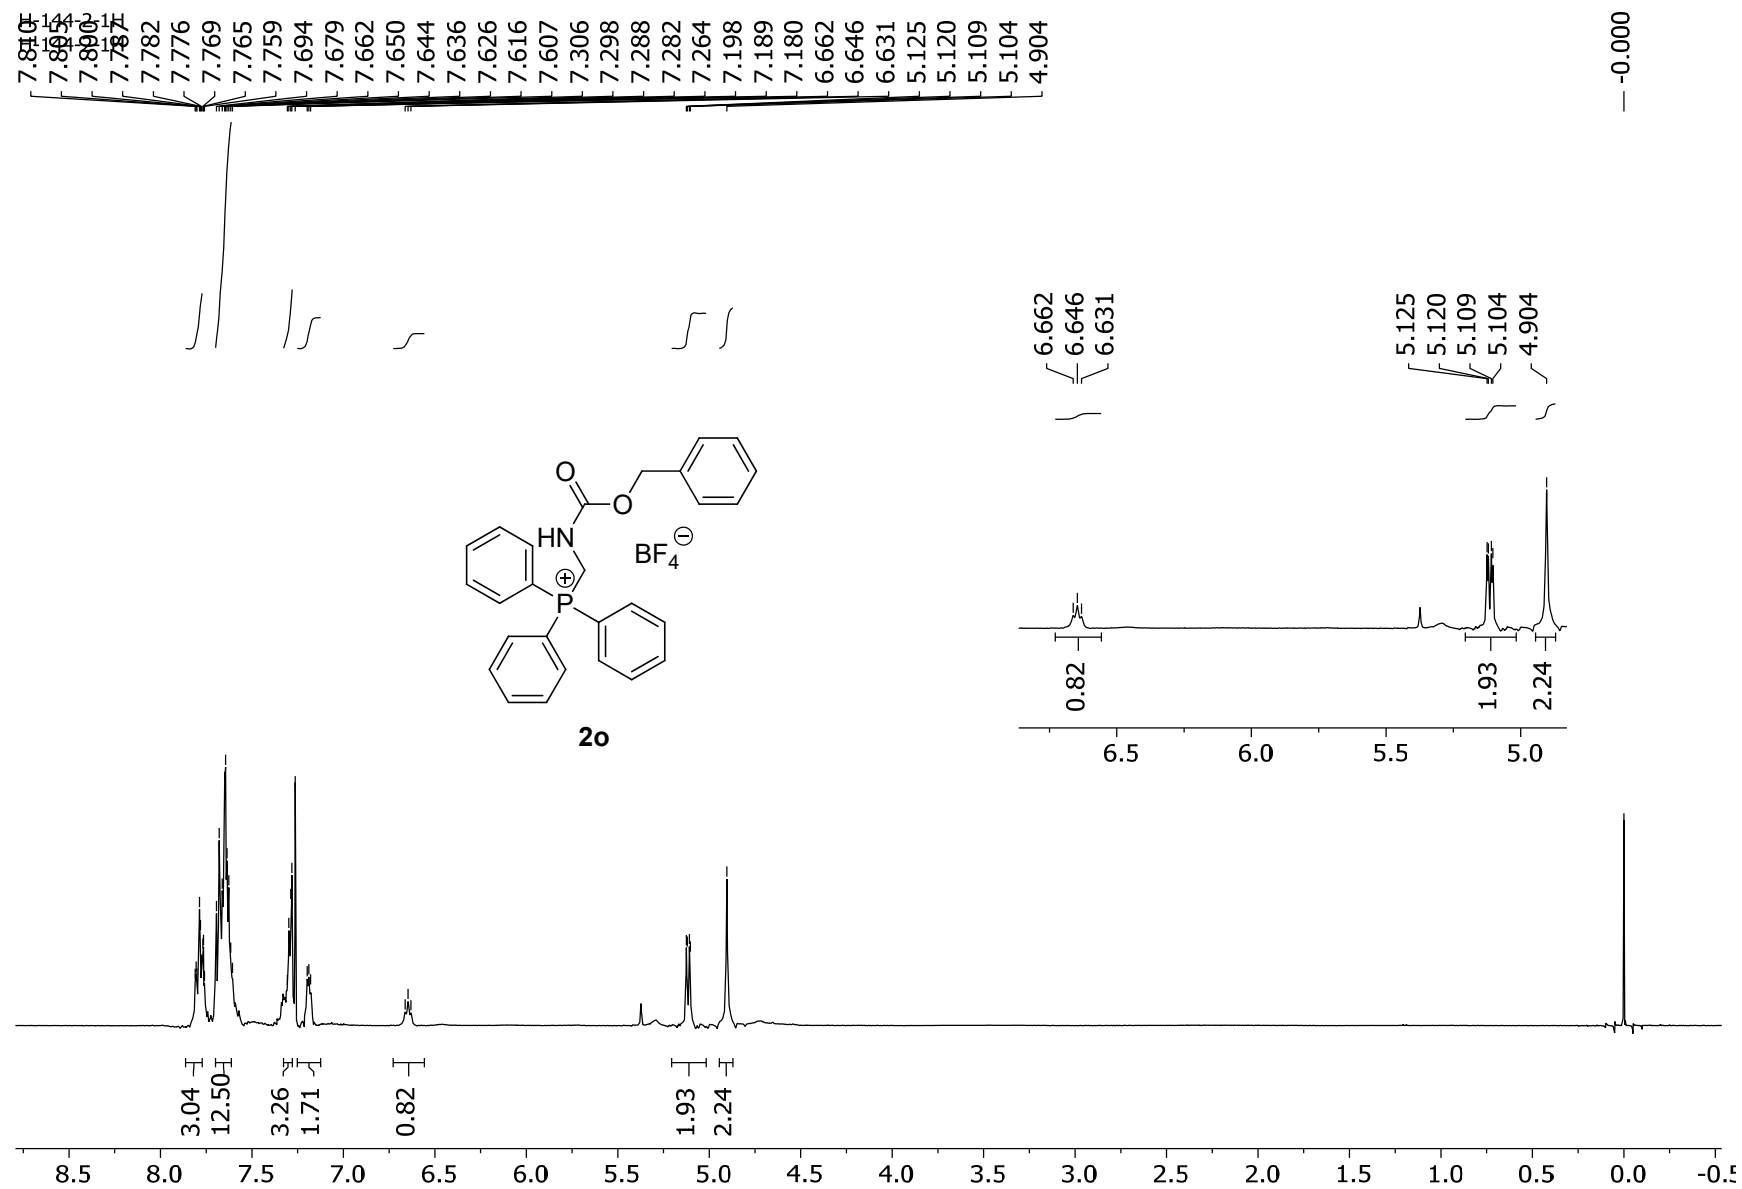

<sup>1</sup>H NMR spectrum of (*N*-benzyloxycarbonylamino)methyltriphenylphosphonium tetrafluoroborate (**2o**); 400 MHz/CDCl<sub>3</sub>/TMS; δ (ppm).

H-1452-13cms  
H-1452-13cms  
156.755  
135.316  
135.286  
134.119  
134.022  
133.777  
130.346  
130.221  
128.414  
128.107  
127.942  
117.002  
116.164

77.317  
76.999  
76.681  
67.414

39.023  
38.432

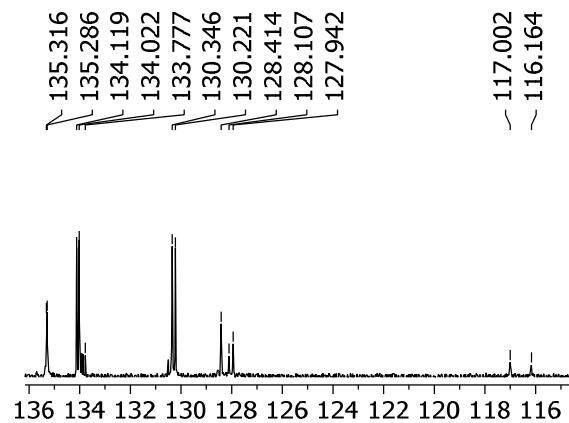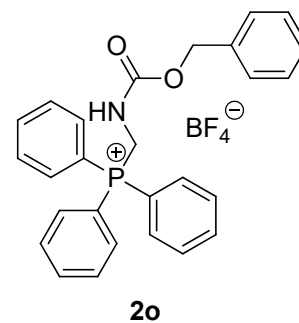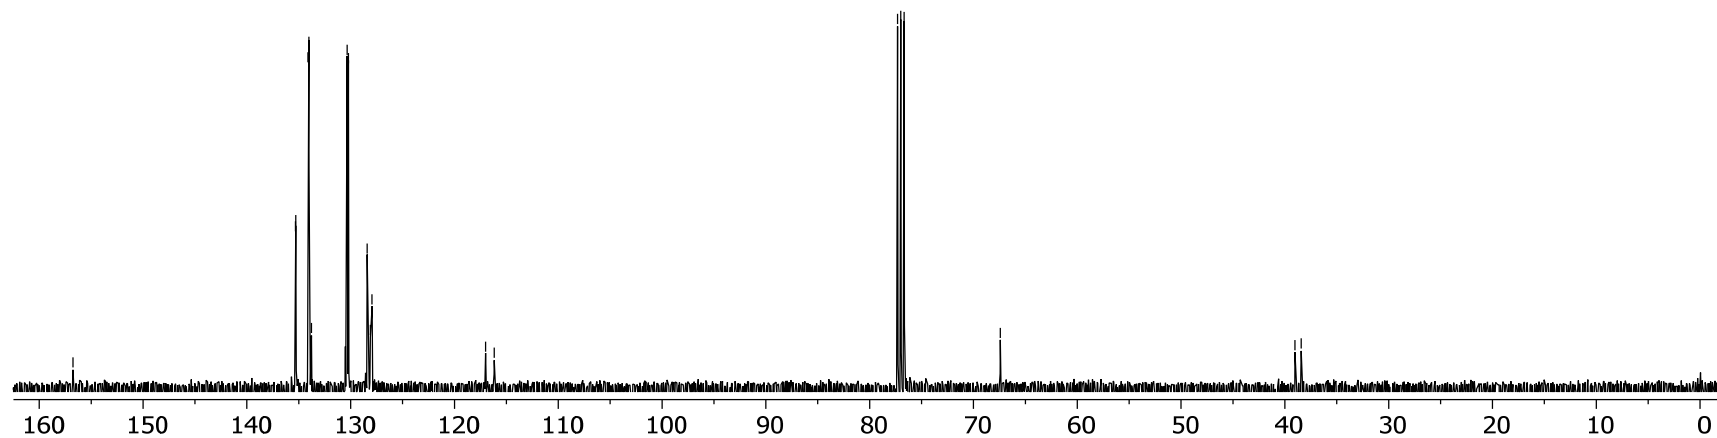

$^{13}\text{C}\{^1\text{H}\}$  NMR spectrum of (*N*-benzyloxycarbonylamino)methyltriphenylphosphonium tetrafluoroborate (**2o**); 100 MHz/ $\text{CDCl}_3/\text{TMS}$ ;  $\delta$  (ppm).

— 19.574

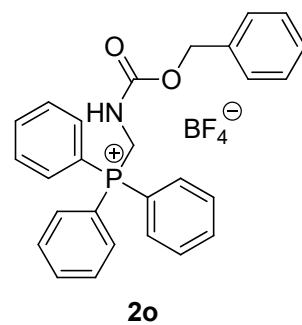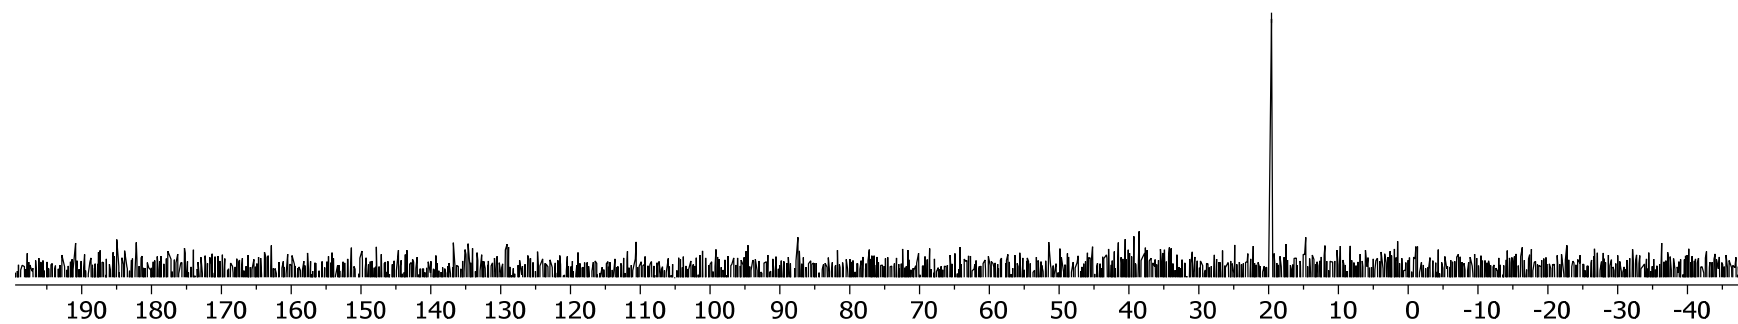

$^{31}\text{P}\{^1\text{H}\}$  NMR spectrum of (*N*-benzyloxycarbonylamino)methyltriphenylphosphonium tetrafluoroborate (**2o**); 161.9 MHz/ $\text{CDCl}_3$ ;  $\delta$  (ppm).

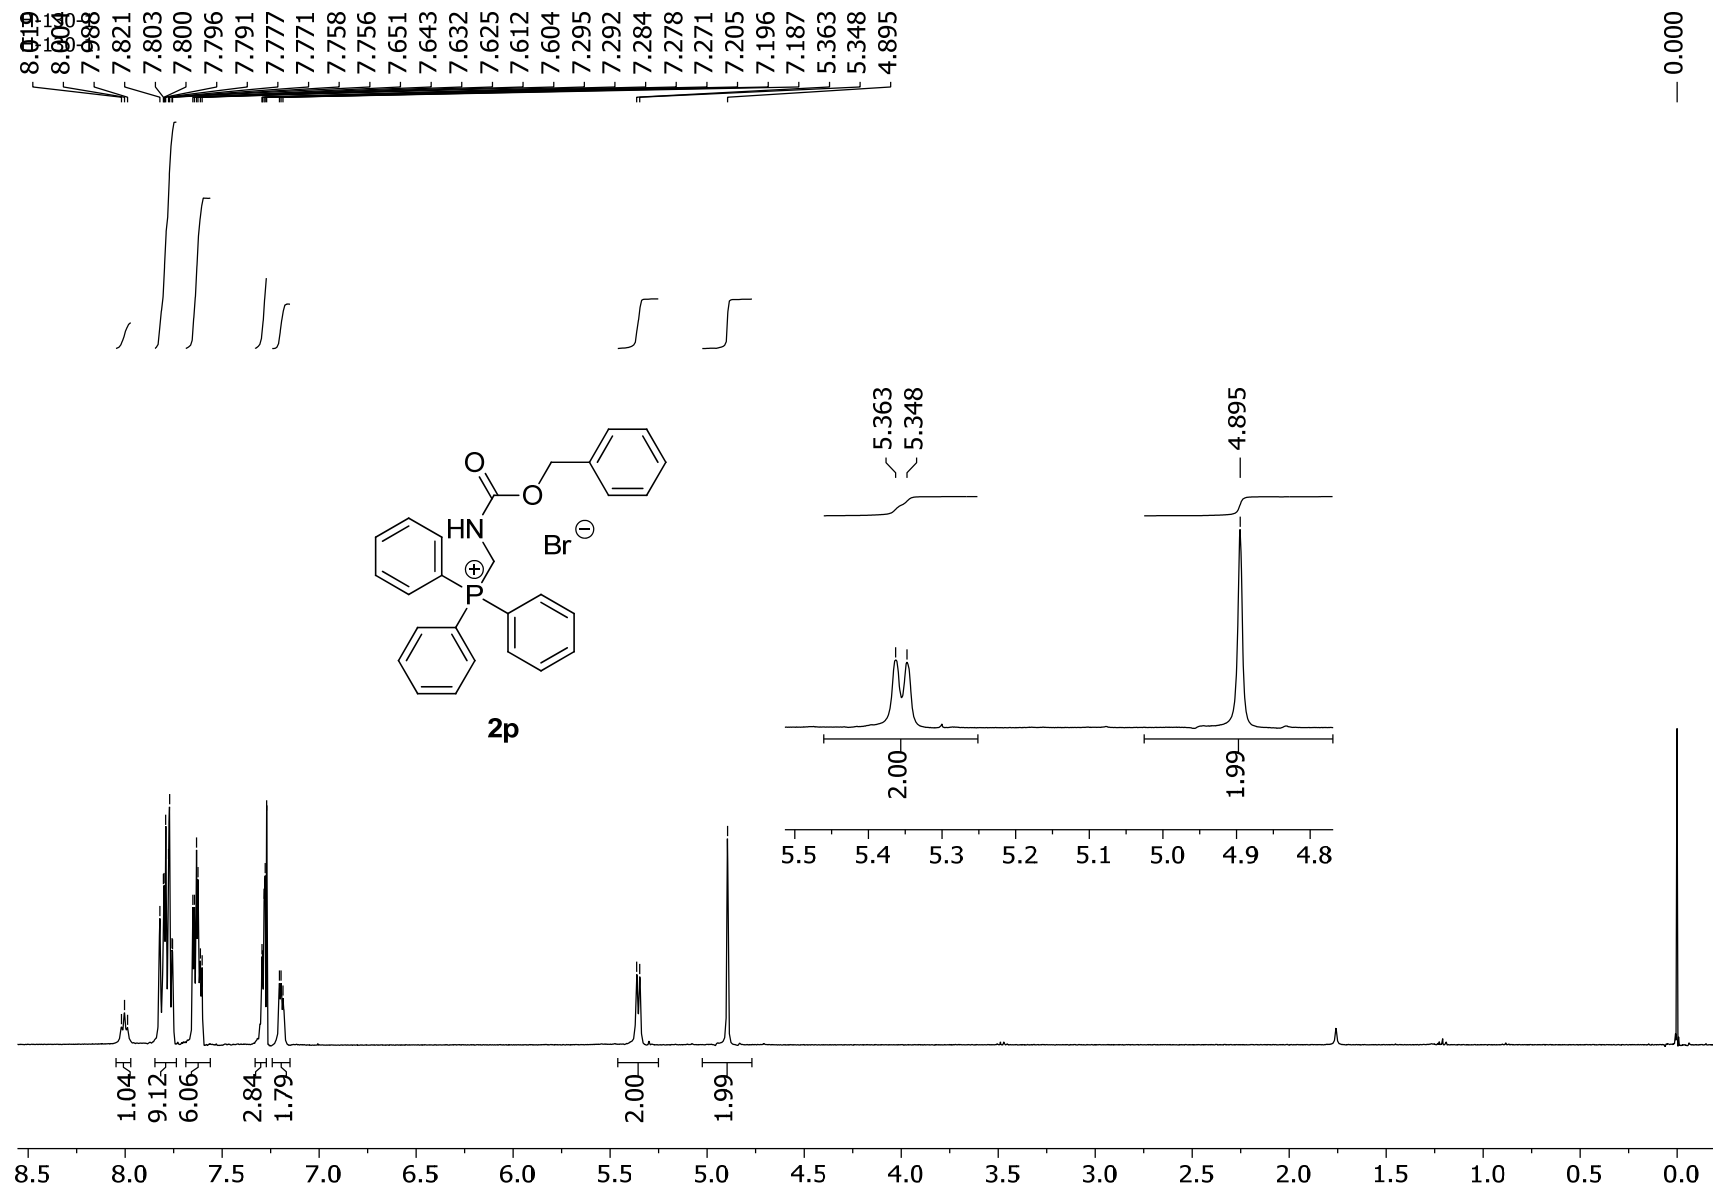

<sup>1</sup>H NMR spectrum of (*N*-benzyloxycarbonylamino)methyltriphenylphosphonium bromide (**2p**); 400 MHz/CDCl<sub>3</sub>/TMS; δ (ppm).

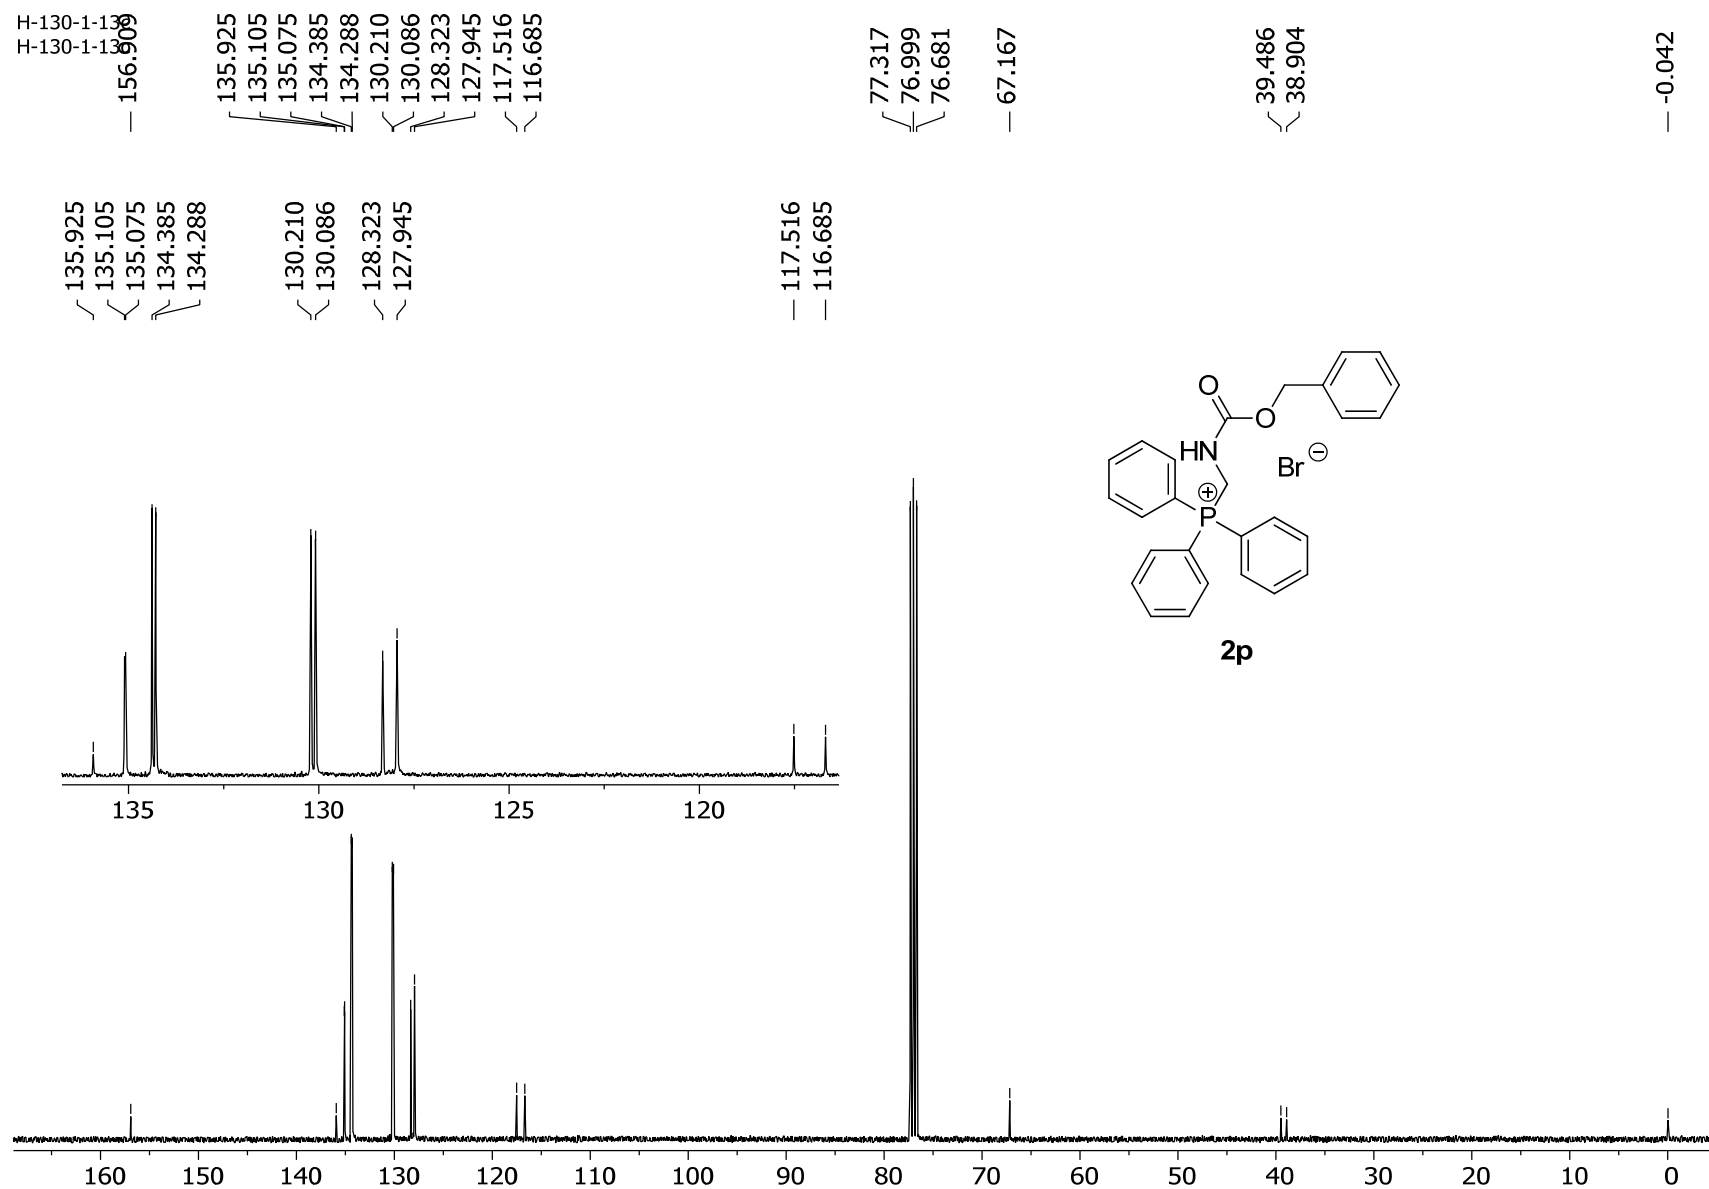



H-130-31P  
H-130-31P

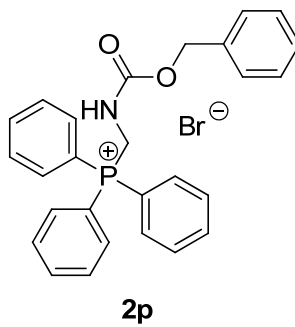

— 19.638

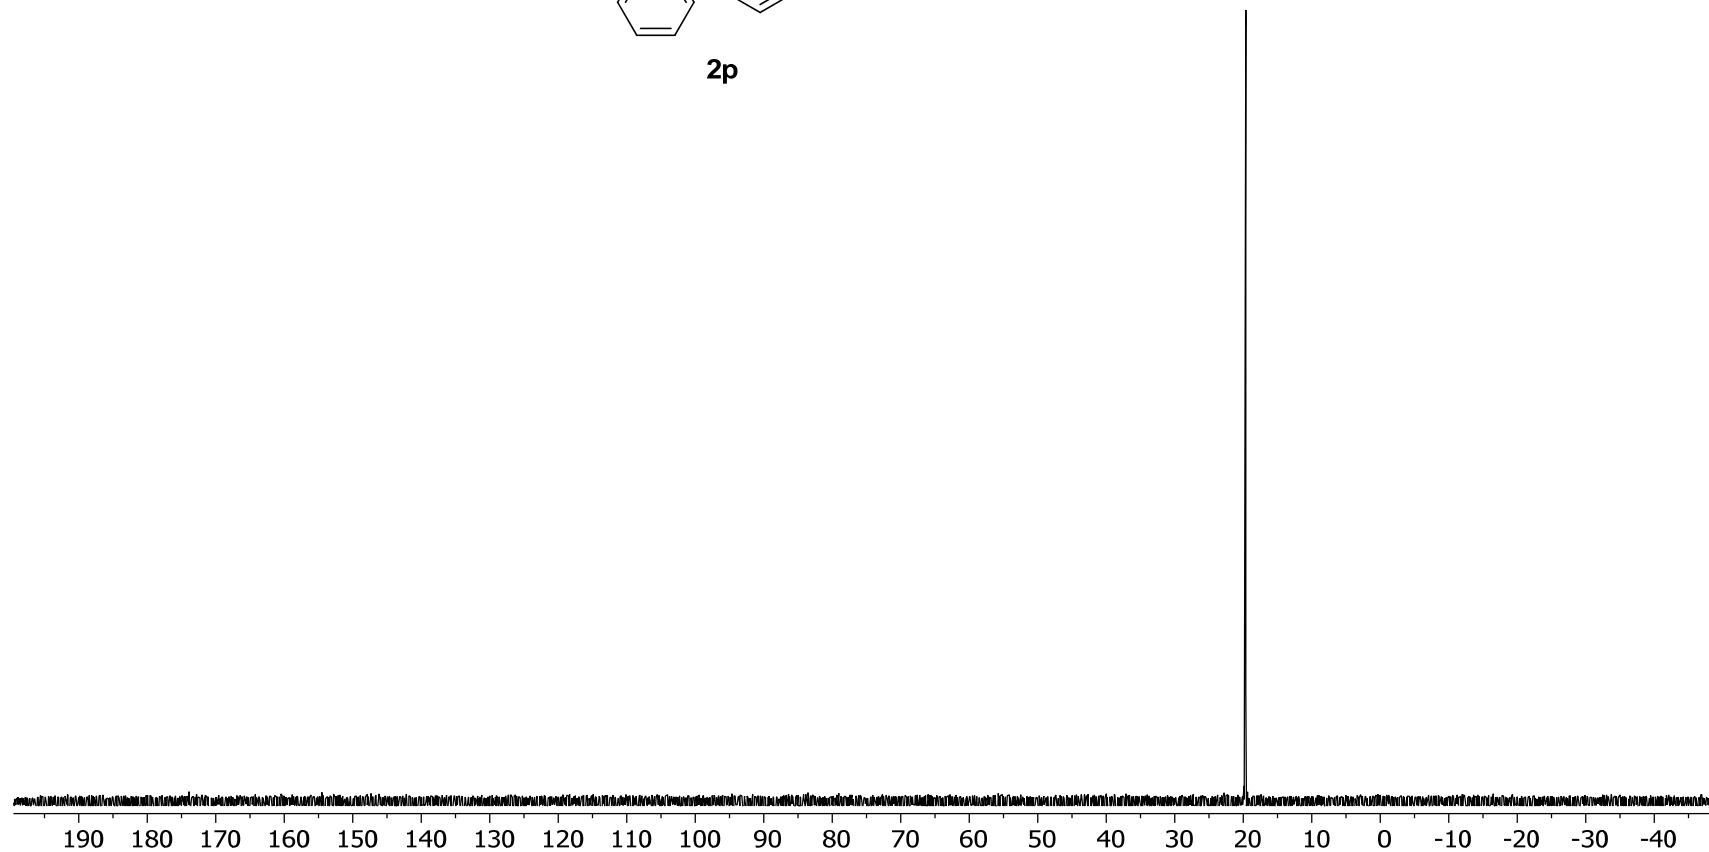

$^{31}\text{P}\{^1\text{H}\}$  NMR spectrum of (*N*-benzyloxycarbonylamino)methyltriphenylphosphonium bromide (**2p**); 161.9 MHz/ $\text{CDCl}_3$ ;  $\delta$  (ppm).

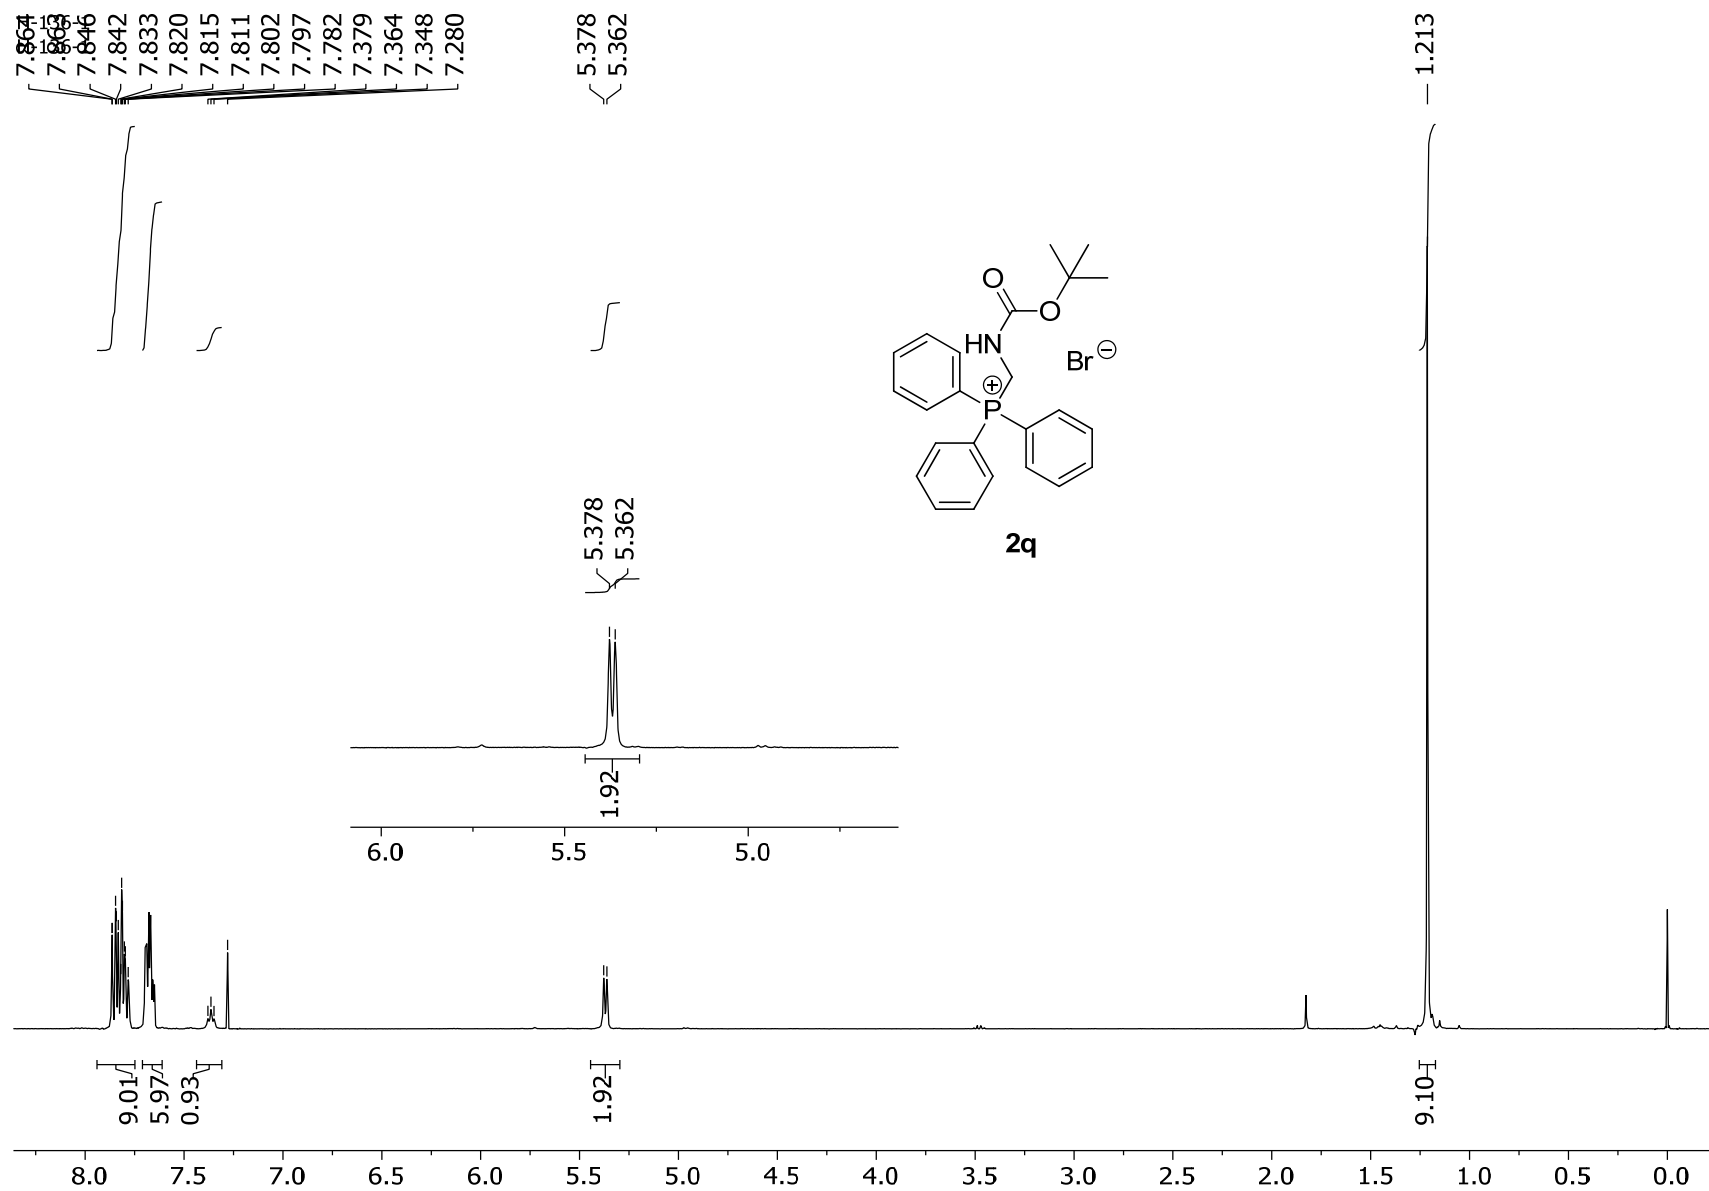

<sup>1</sup>H NMR spectrum of (*N*-*tert*-butoxycarbonylamino)methylphosphonium bromide (**2q**); 400 MHz/CDCl<sub>3</sub>/TMS;  $\delta$  (ppm).

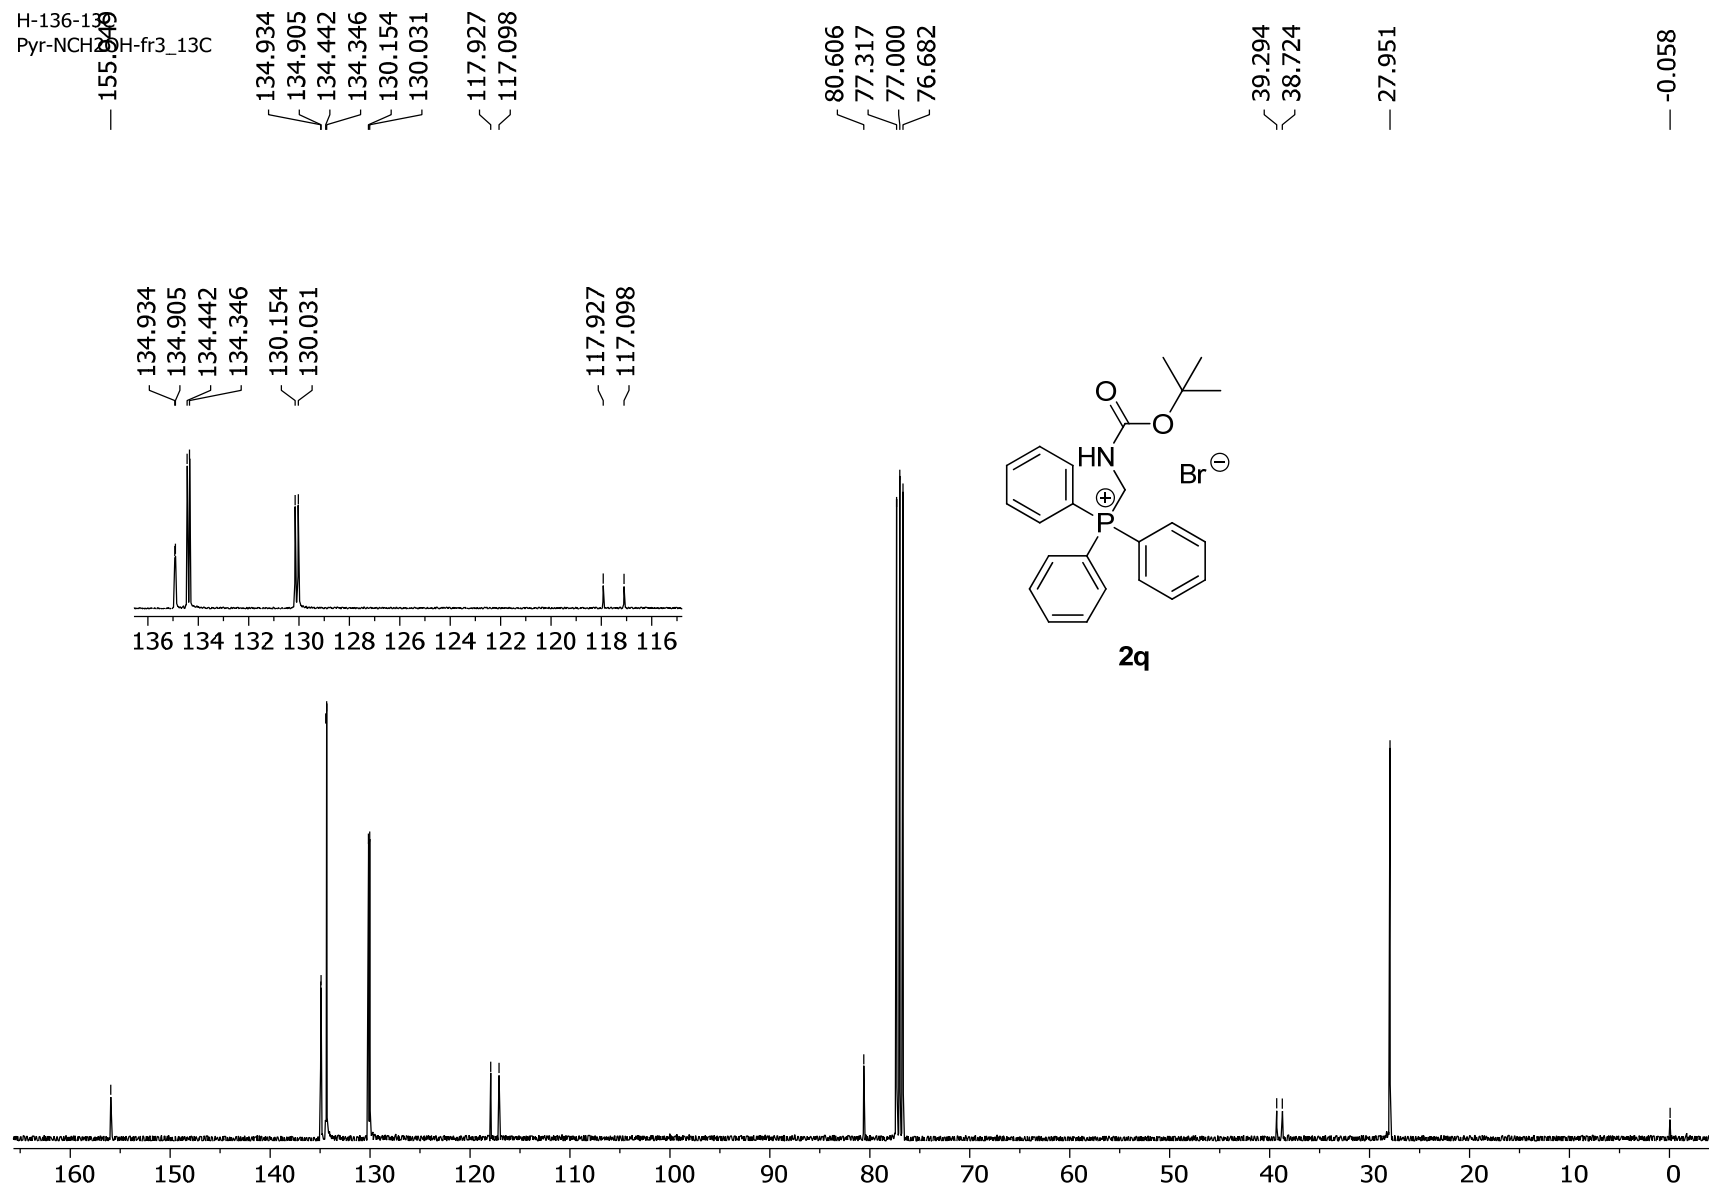

<sup>13</sup>C{<sup>1</sup>H} NMR spectrum of (*N*-*tert*-butoxycarbonylamino)methylphosphonium bromide (**2q**); 100 MHz/CDCl<sub>3</sub>/TMS; δ (ppm).

H-136-31P  
H-136-31P

— 19.562

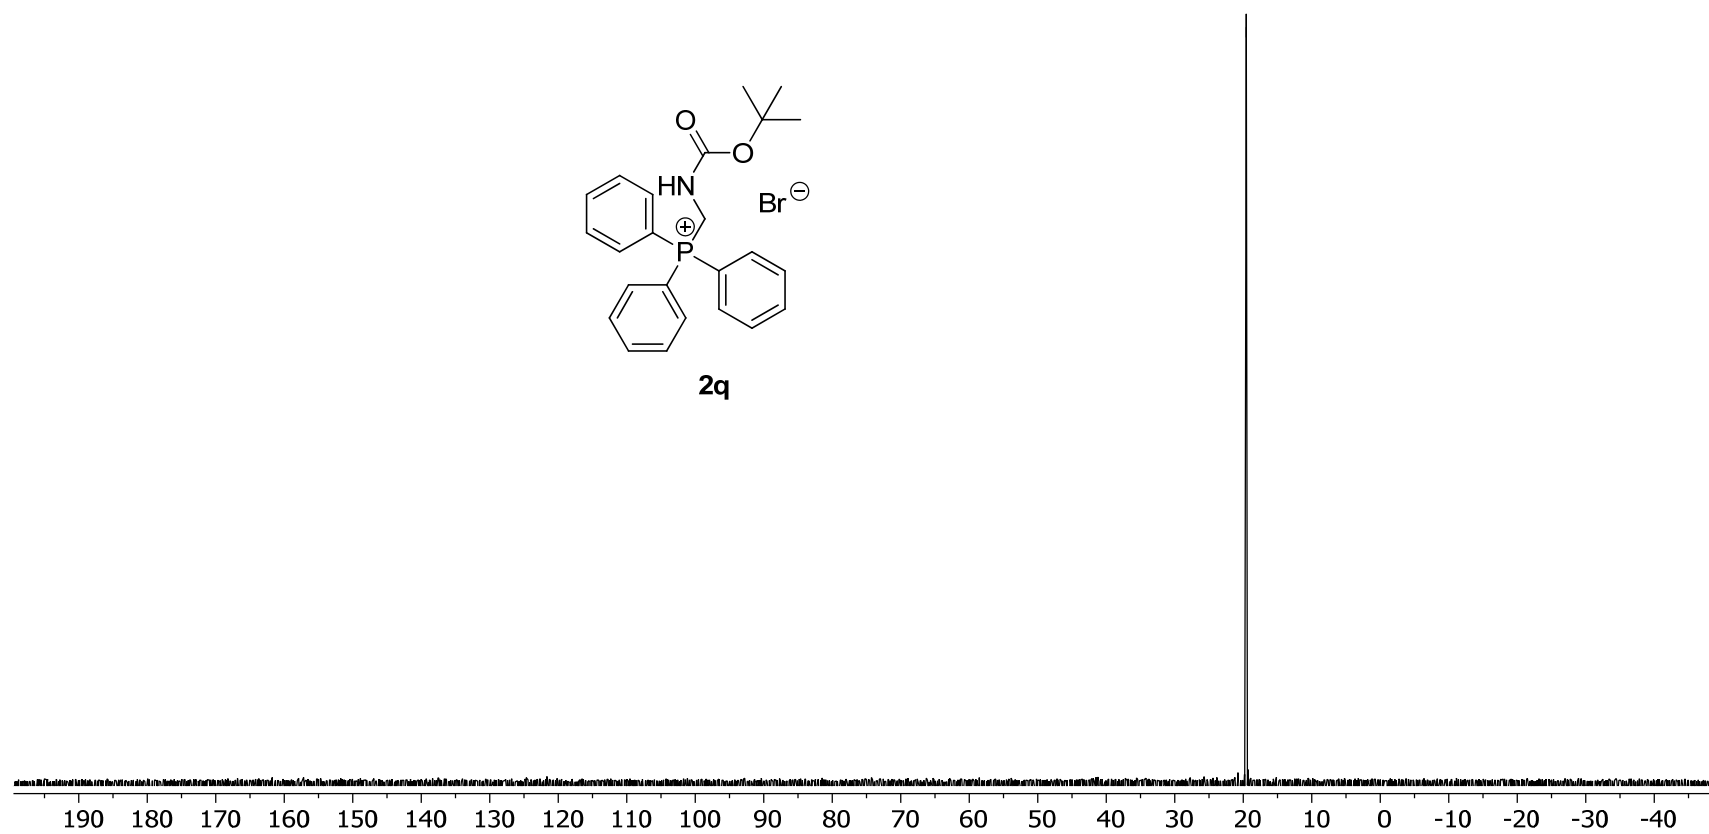

$^{31}\text{P}\{^1\text{H}\}$  NMR spectrum of (*N*-*tert*-butoxycarbonylamino)methylphosphonium bromide (**2q**); 161.9 MHz/ $\text{CDCl}_3$ ;  $\delta$  (ppm).

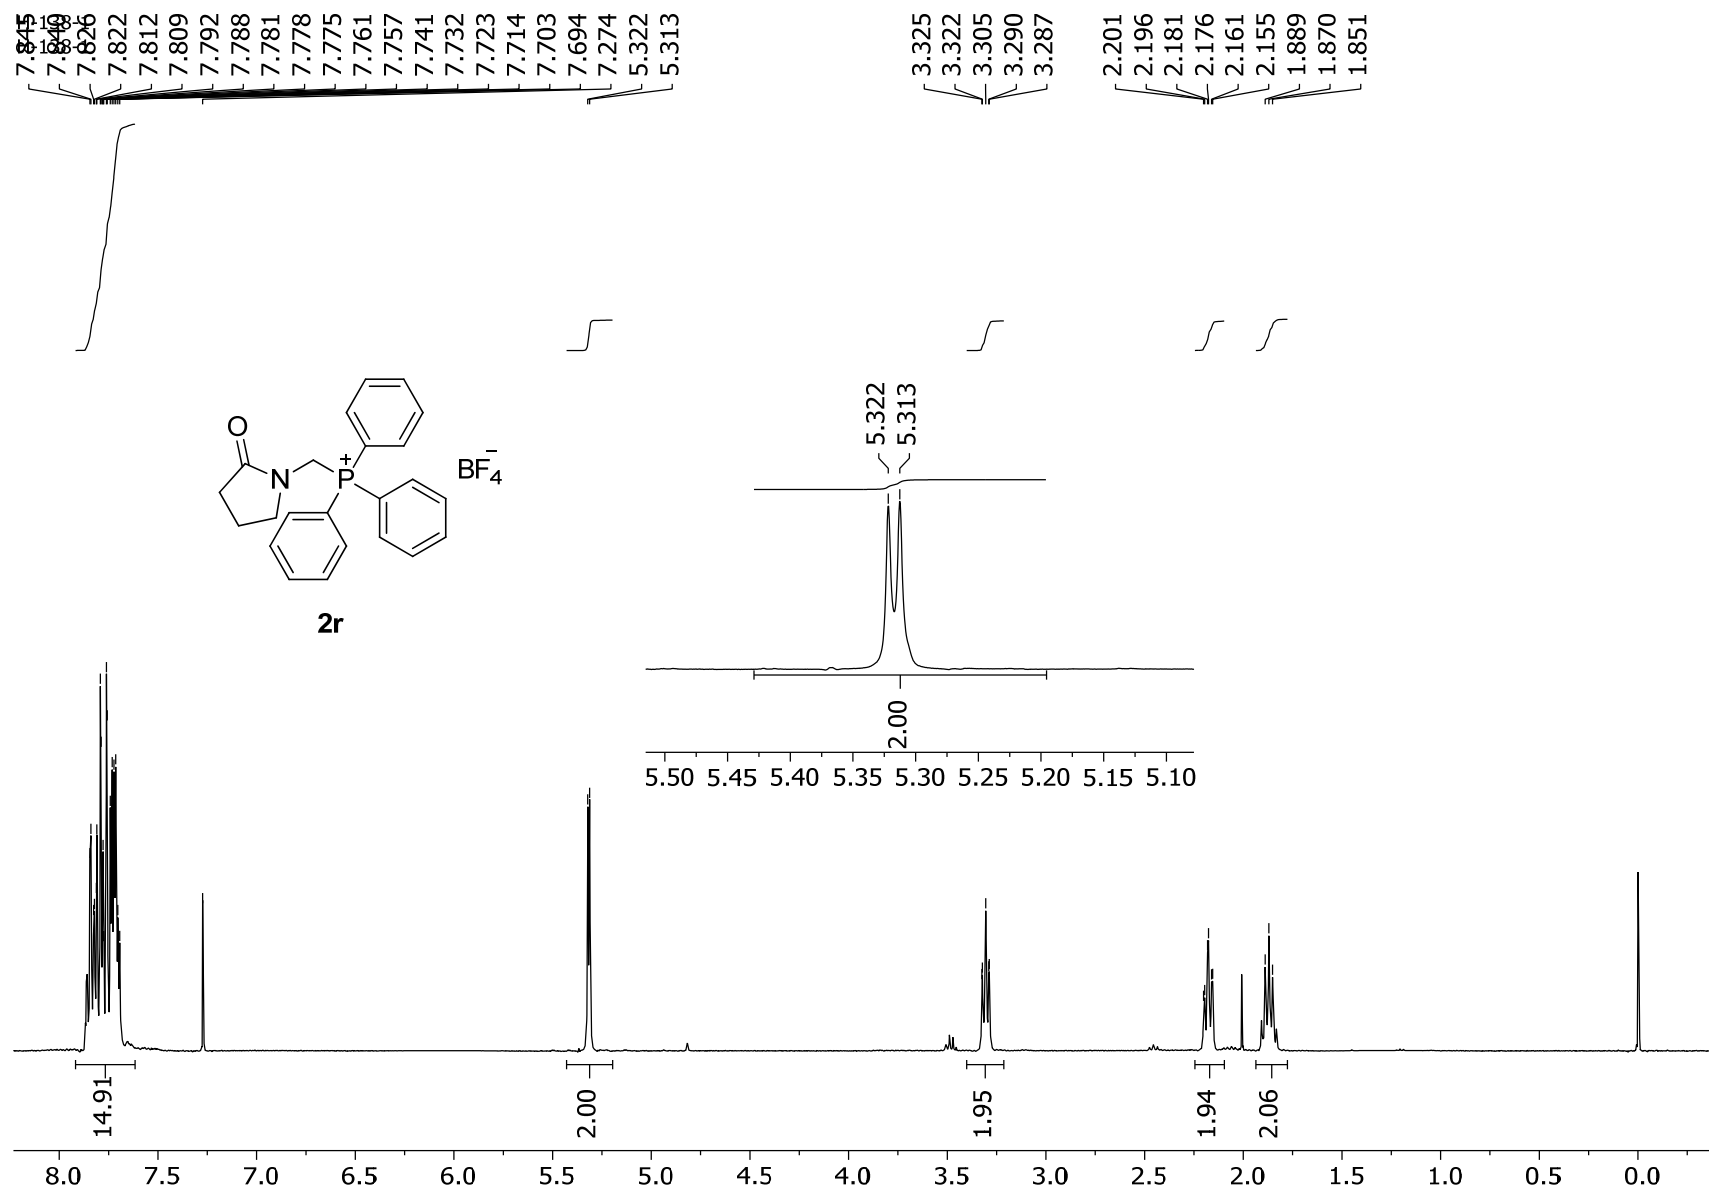

$^1\text{H}$  NMR spectrum of (2-oxopyrrolidin-1-yl)methyltriphenylphosphonium tetrafluoroborate (**2r**); 400 MHz/ $\text{CDCl}_3$ /TMS;  $\delta$  (ppm).

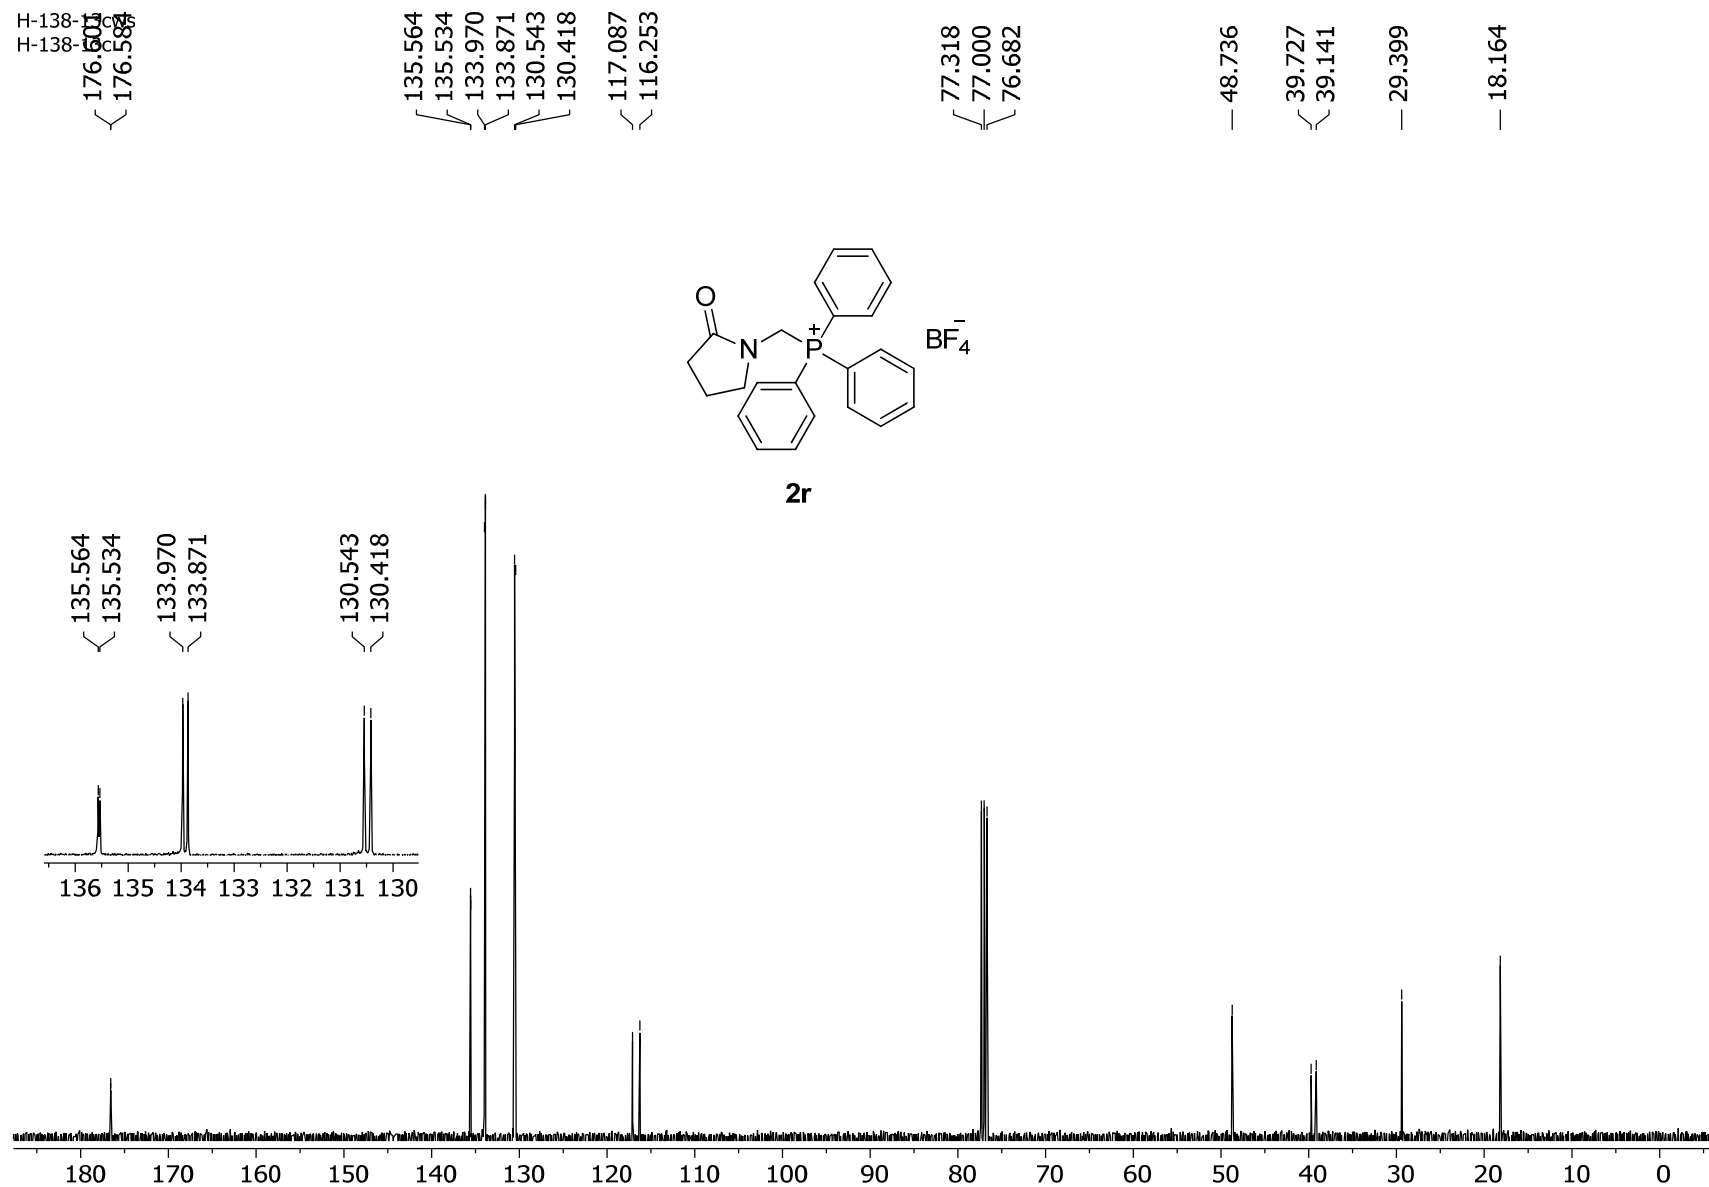

$^{13}\text{C}\{^1\text{H}\}$  NMR spectrum of (2-oxopyrrolidin-1-yl)methyltriphenylphosphonium tetrafluoroborate (**2r**); 100 MHz/ $\text{CDCl}_3/\text{TMS}$ ;  $\delta$  (ppm).

H-138-31P  
H-138-31P

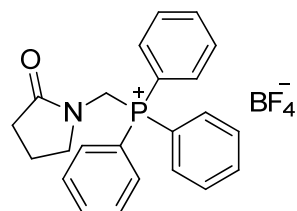

**2r**

— 17.880

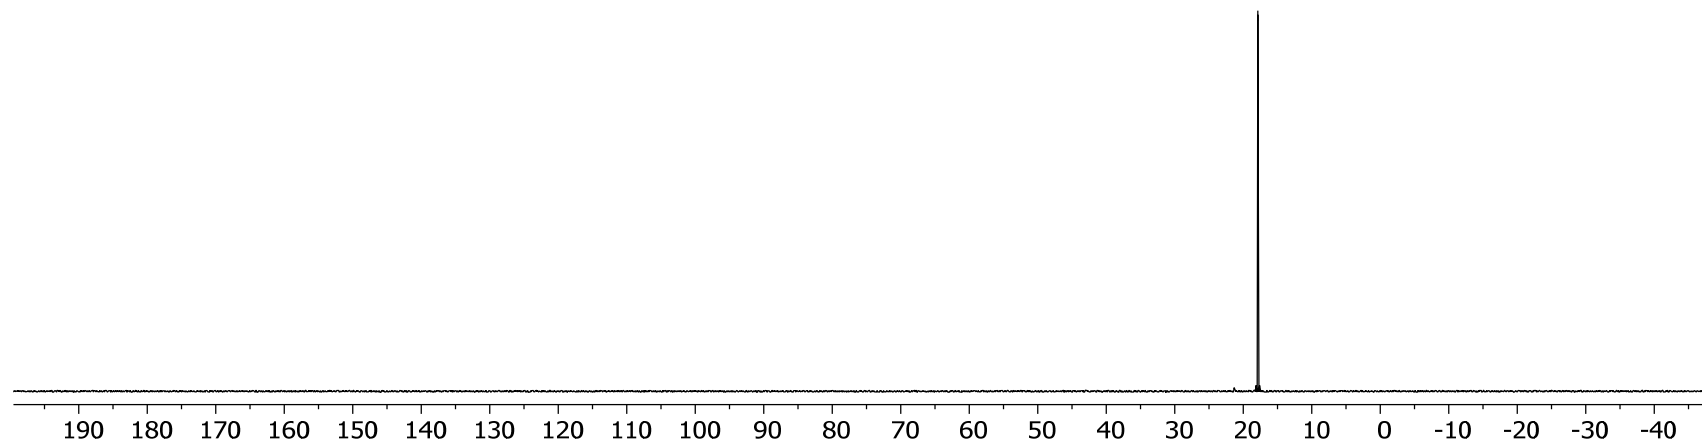

$^{31}\text{P}\{^1\text{H}\}$  NMR spectrum of (2-oxopyrrolidin-1-yl)methyltriphenylphosphonium tetrafluoroborate (**2r**); 161.9 MHz/ $\text{CDCl}_3$ ;  $\delta$  (ppm).

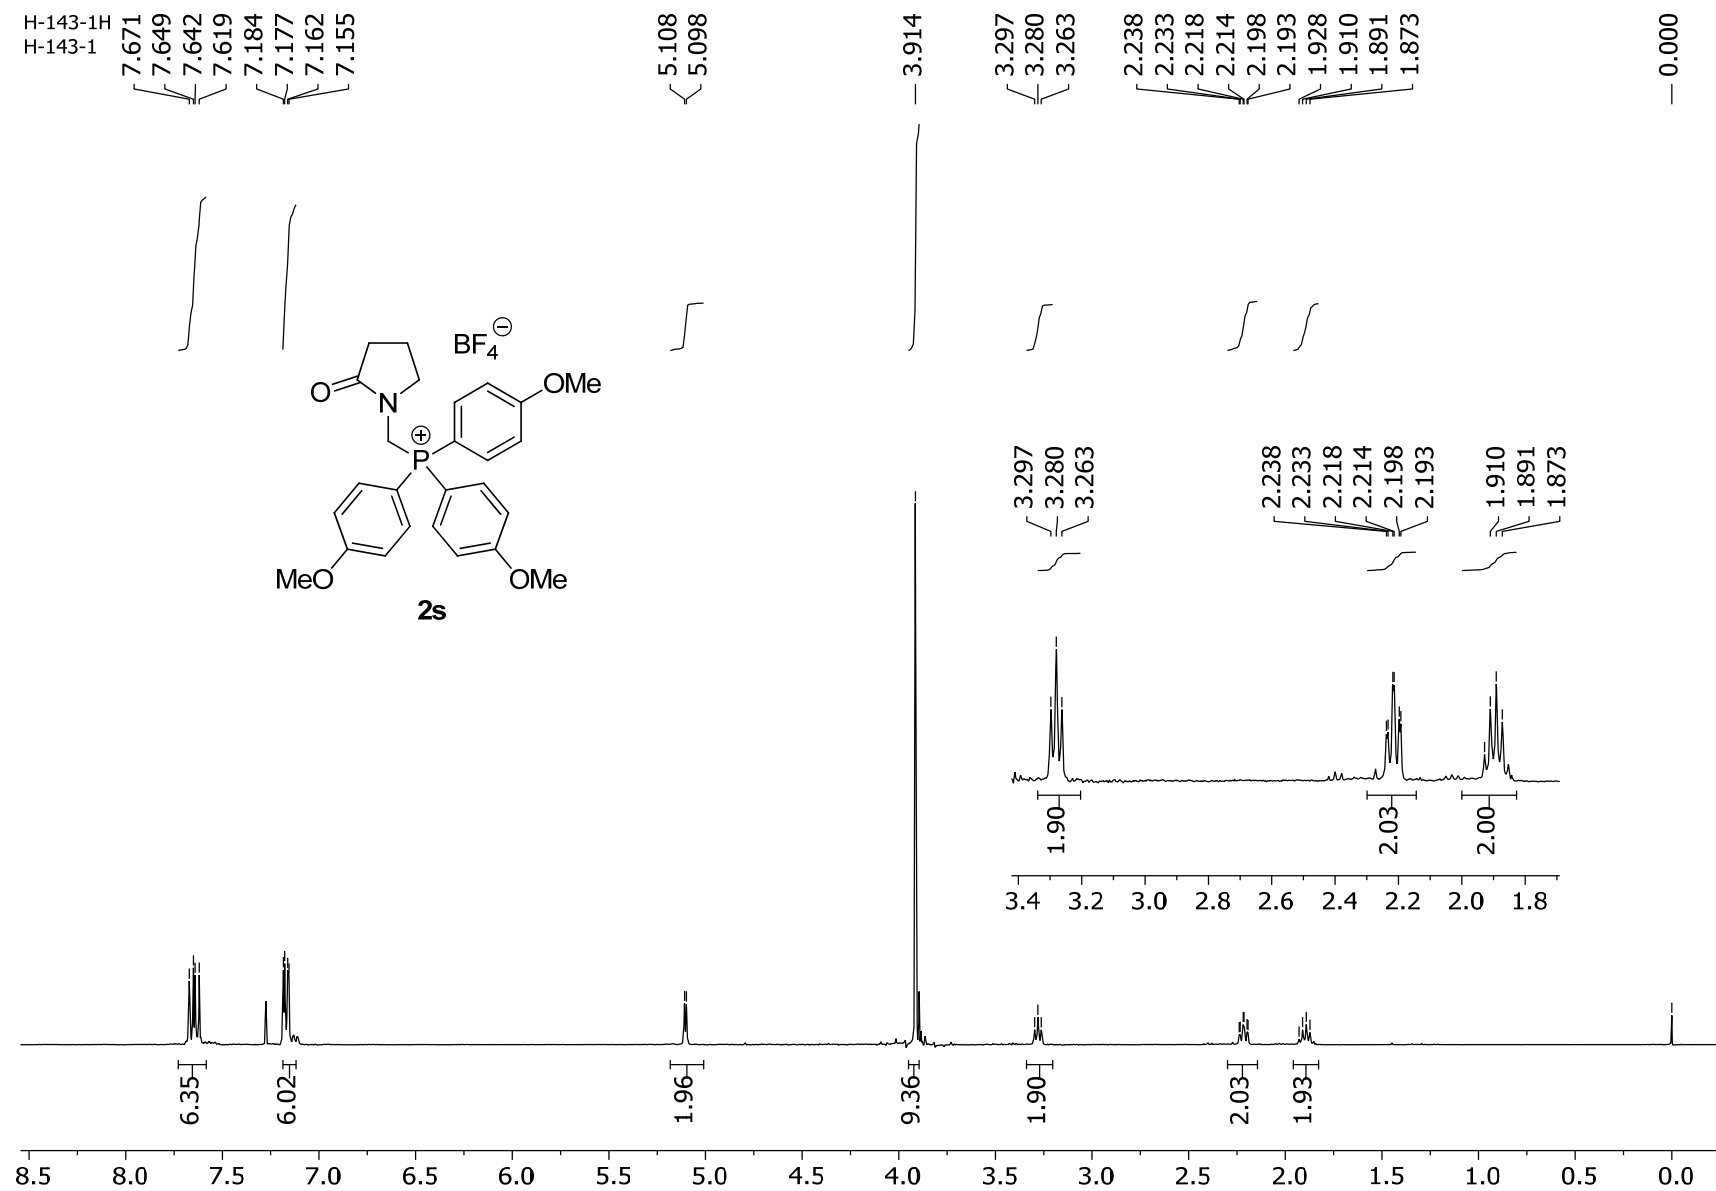

<sup>1</sup>H NMR spectrum of (2-oxopyrrolidin-1-yl)methyltris(4-methoxyphenyl)phosphonium tetrafluoroborate (**2s**); 400 MHz/CDCl<sub>3</sub>/TMS; δ (ppm).



H-143-1-13cws  
H-143-1-13c

176.463  
176.445  
165.021  
164.992

135.832  
135.716

116.212  
116.075  
107.622  
106.704

77.318  
77.000  
76.682

55.844  
48.742  
40.226  
39.608

29.560  
18.180

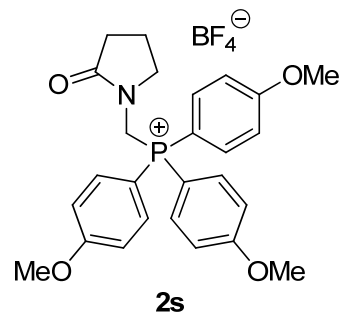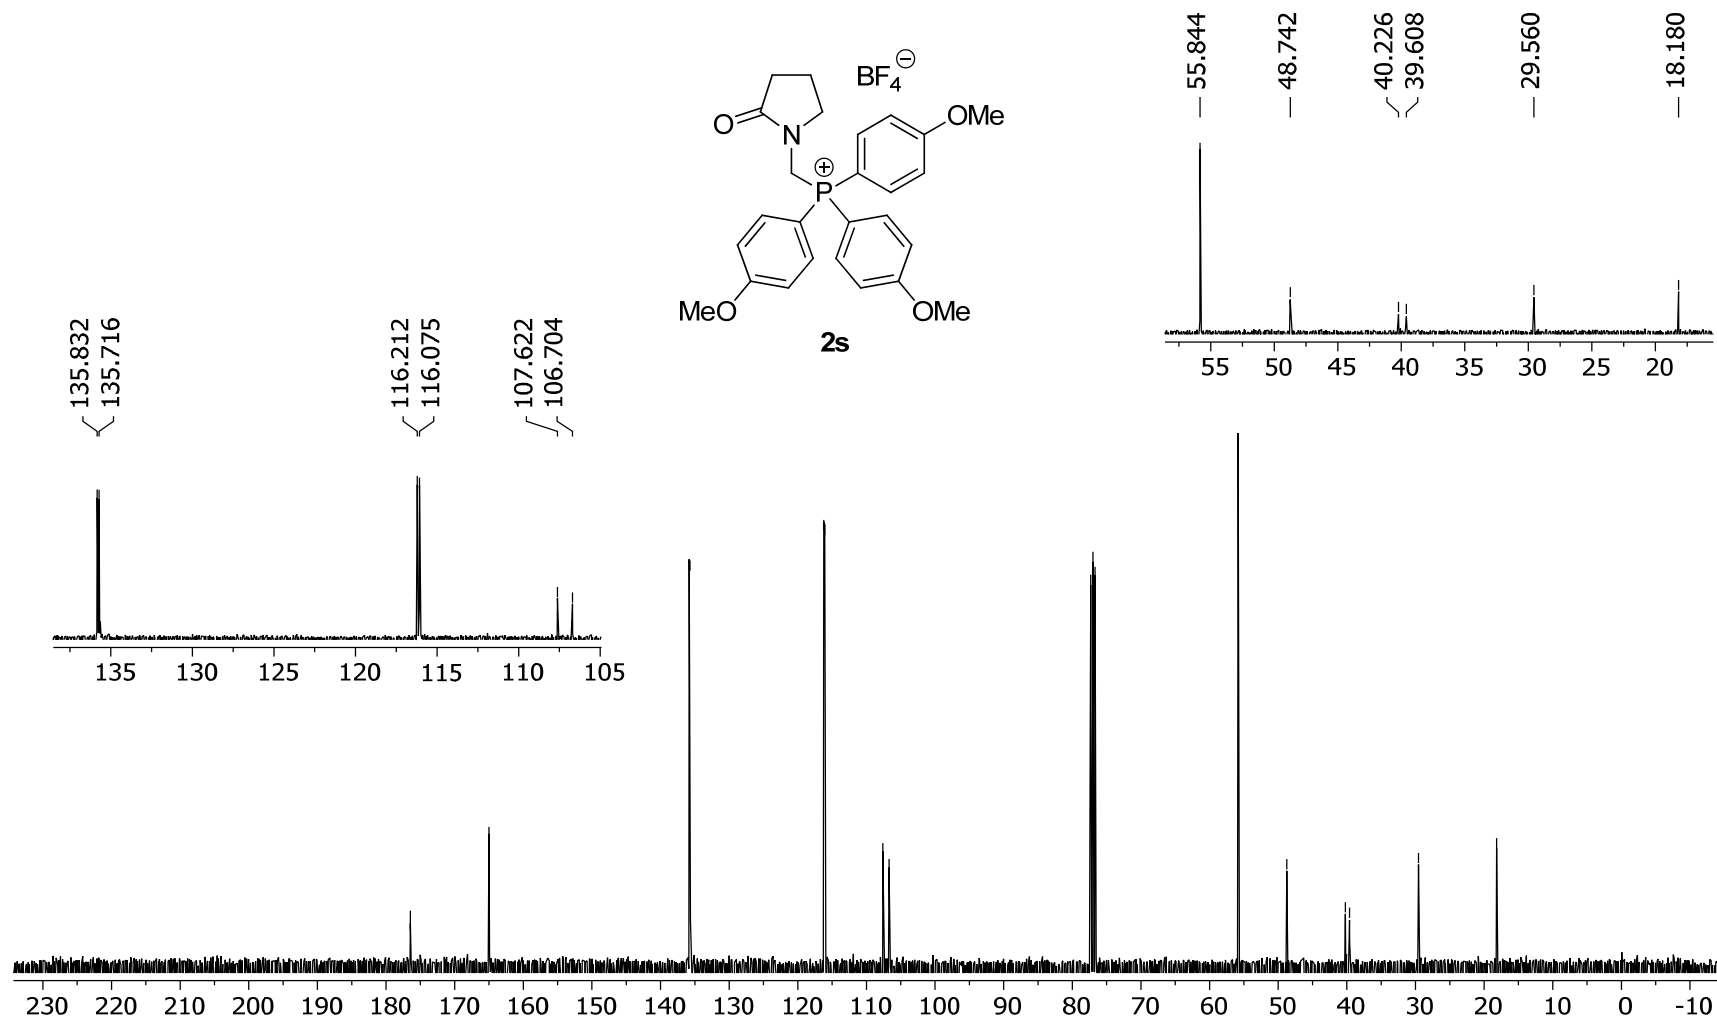

$^{13}\text{C}\{^1\text{H}\}$  NMR spectrum of (2-oxopyrrolidin-1-yl)methyltris(4-methoxyphenyl)phosphonium tetrafluoroborate (**2s**); 100 MHz/ $\text{CDCl}_3/\text{TMS}$ ;  $\delta$  (ppm).

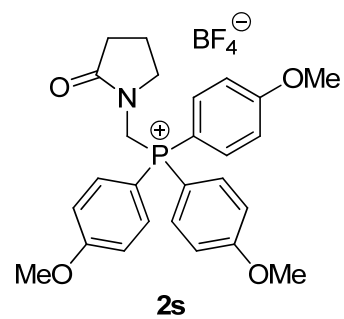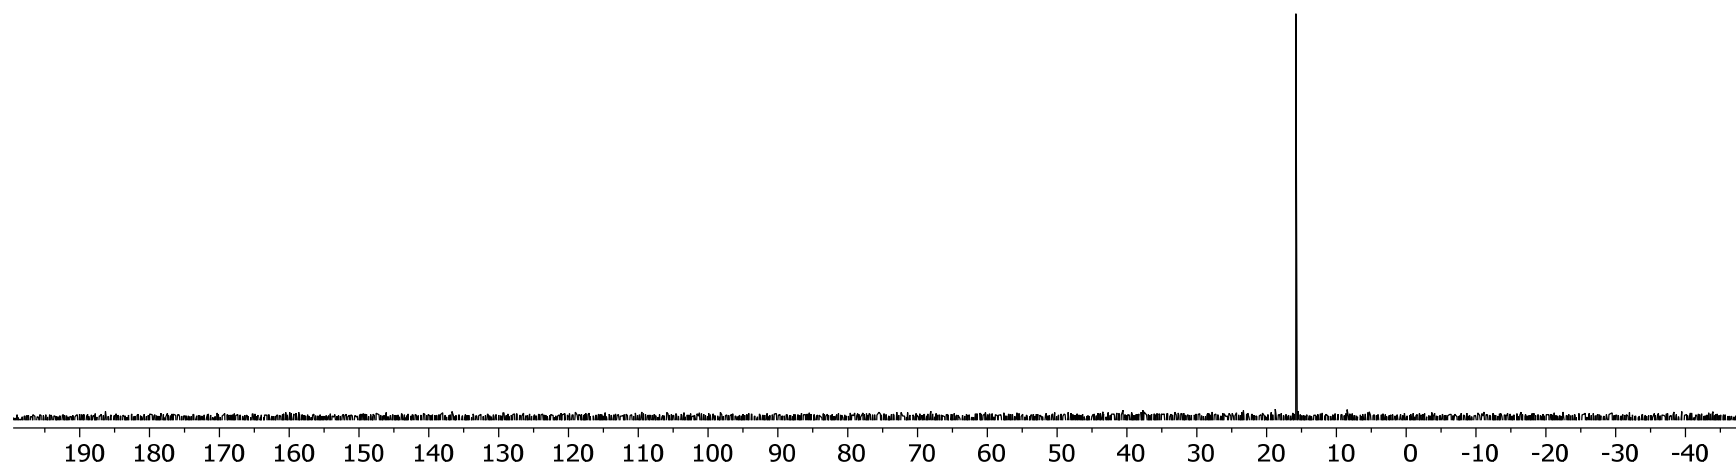

$^{31}\text{P}\{^1\text{H}\}$  NMR spectrum of (2-oxopyrrolidin-1-yl)methyltris(4-methoxyphenyl)phosphonium tetrafluoroborate (**2s**); 161.9 MHz/ $\text{CDCl}_3$ ;  $\delta$  (ppm).

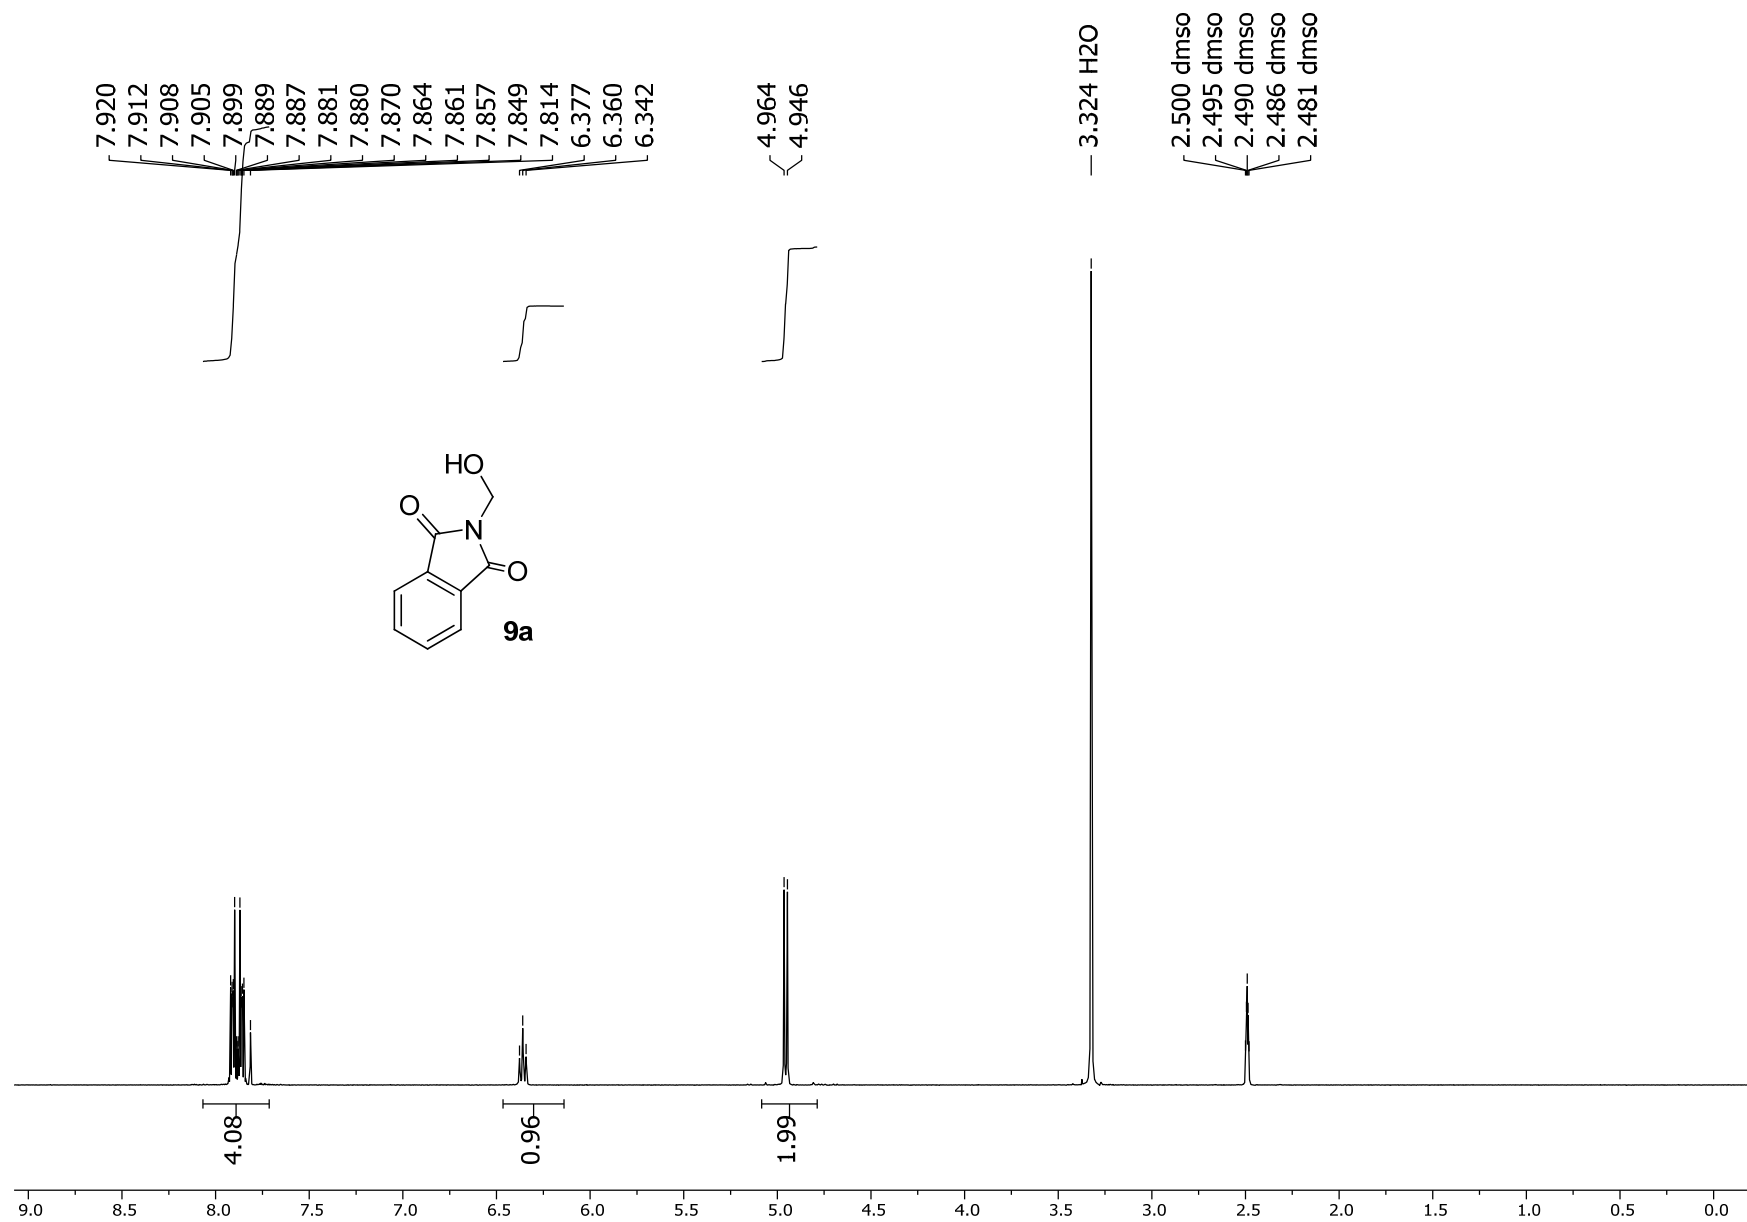

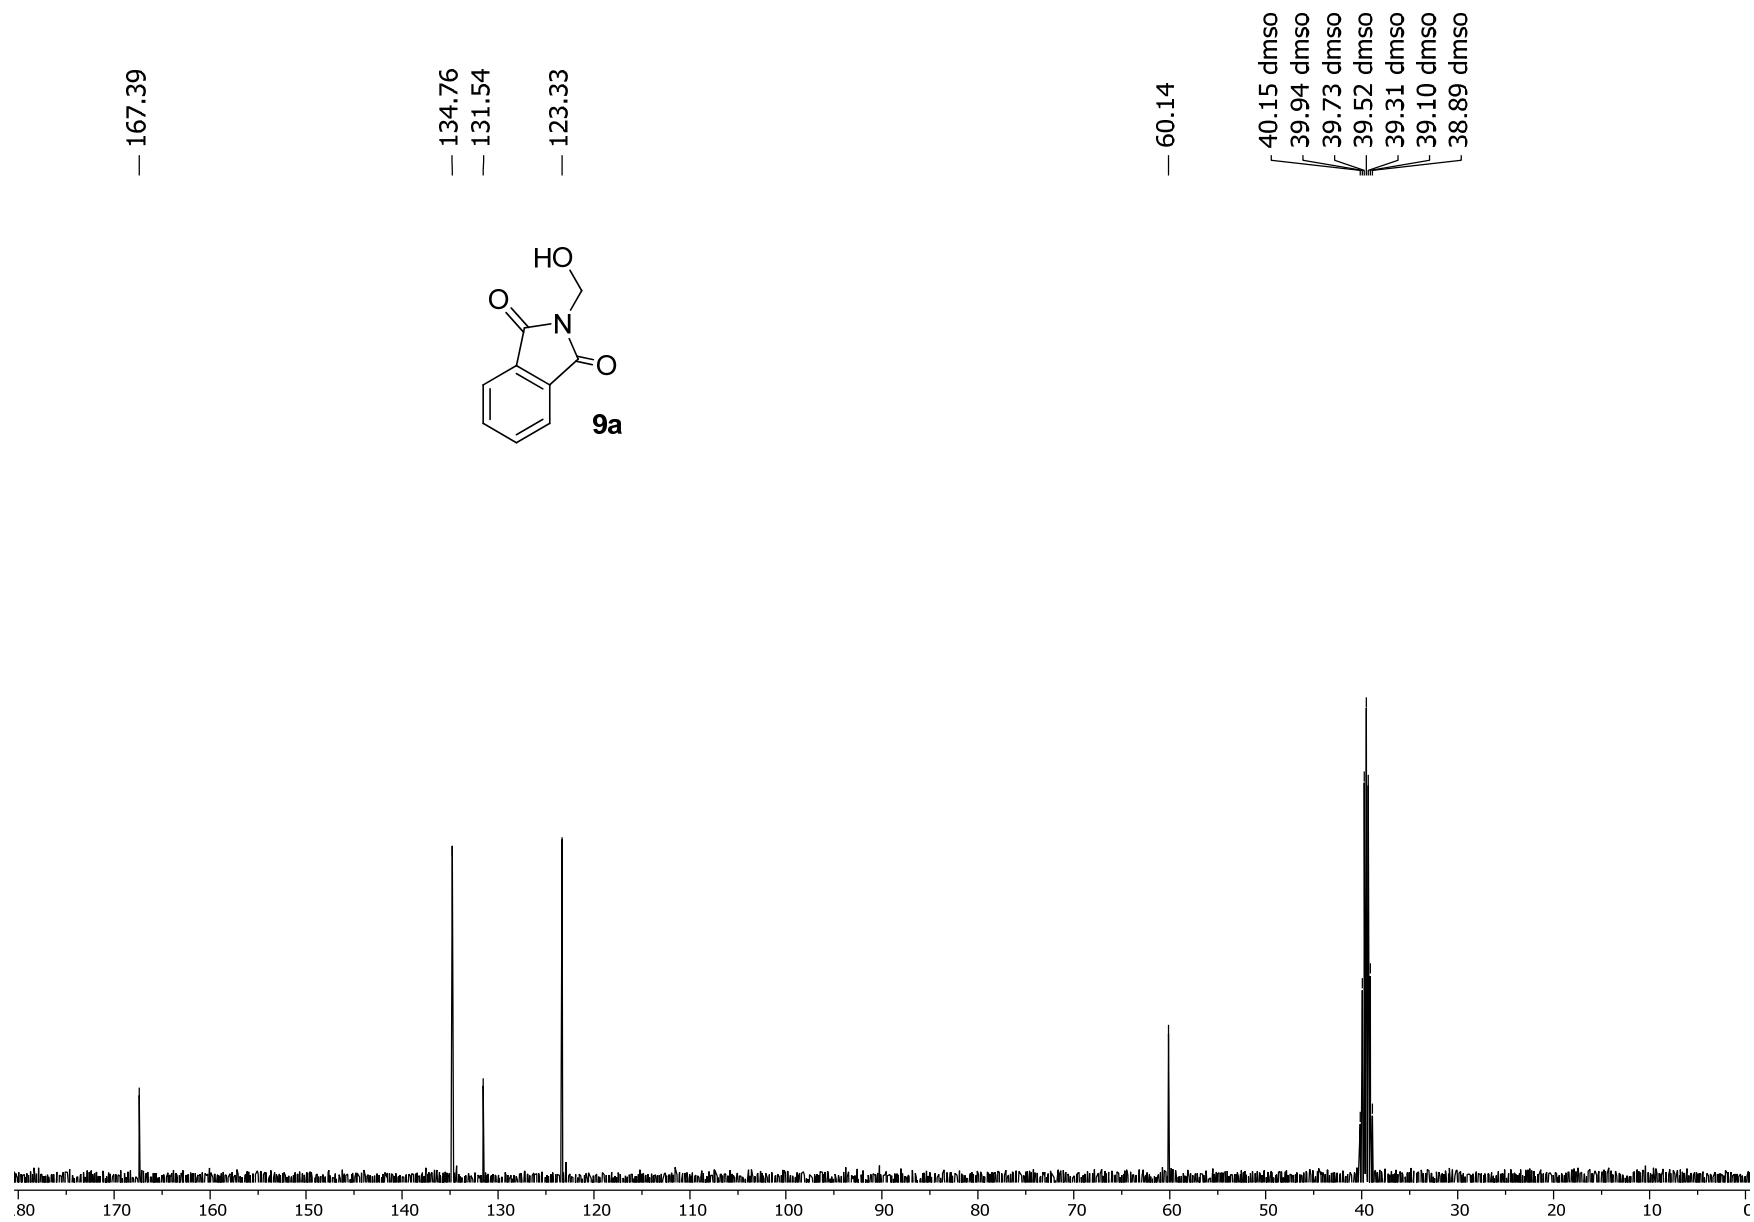

$^{13}\text{C}\{^1\text{H}\}$  NMR spectrum of *N*-hydroxymethylphthalimide (**9a**); 100 MHz/DMSO- $d_6$ ;  $\delta$  (ppm).

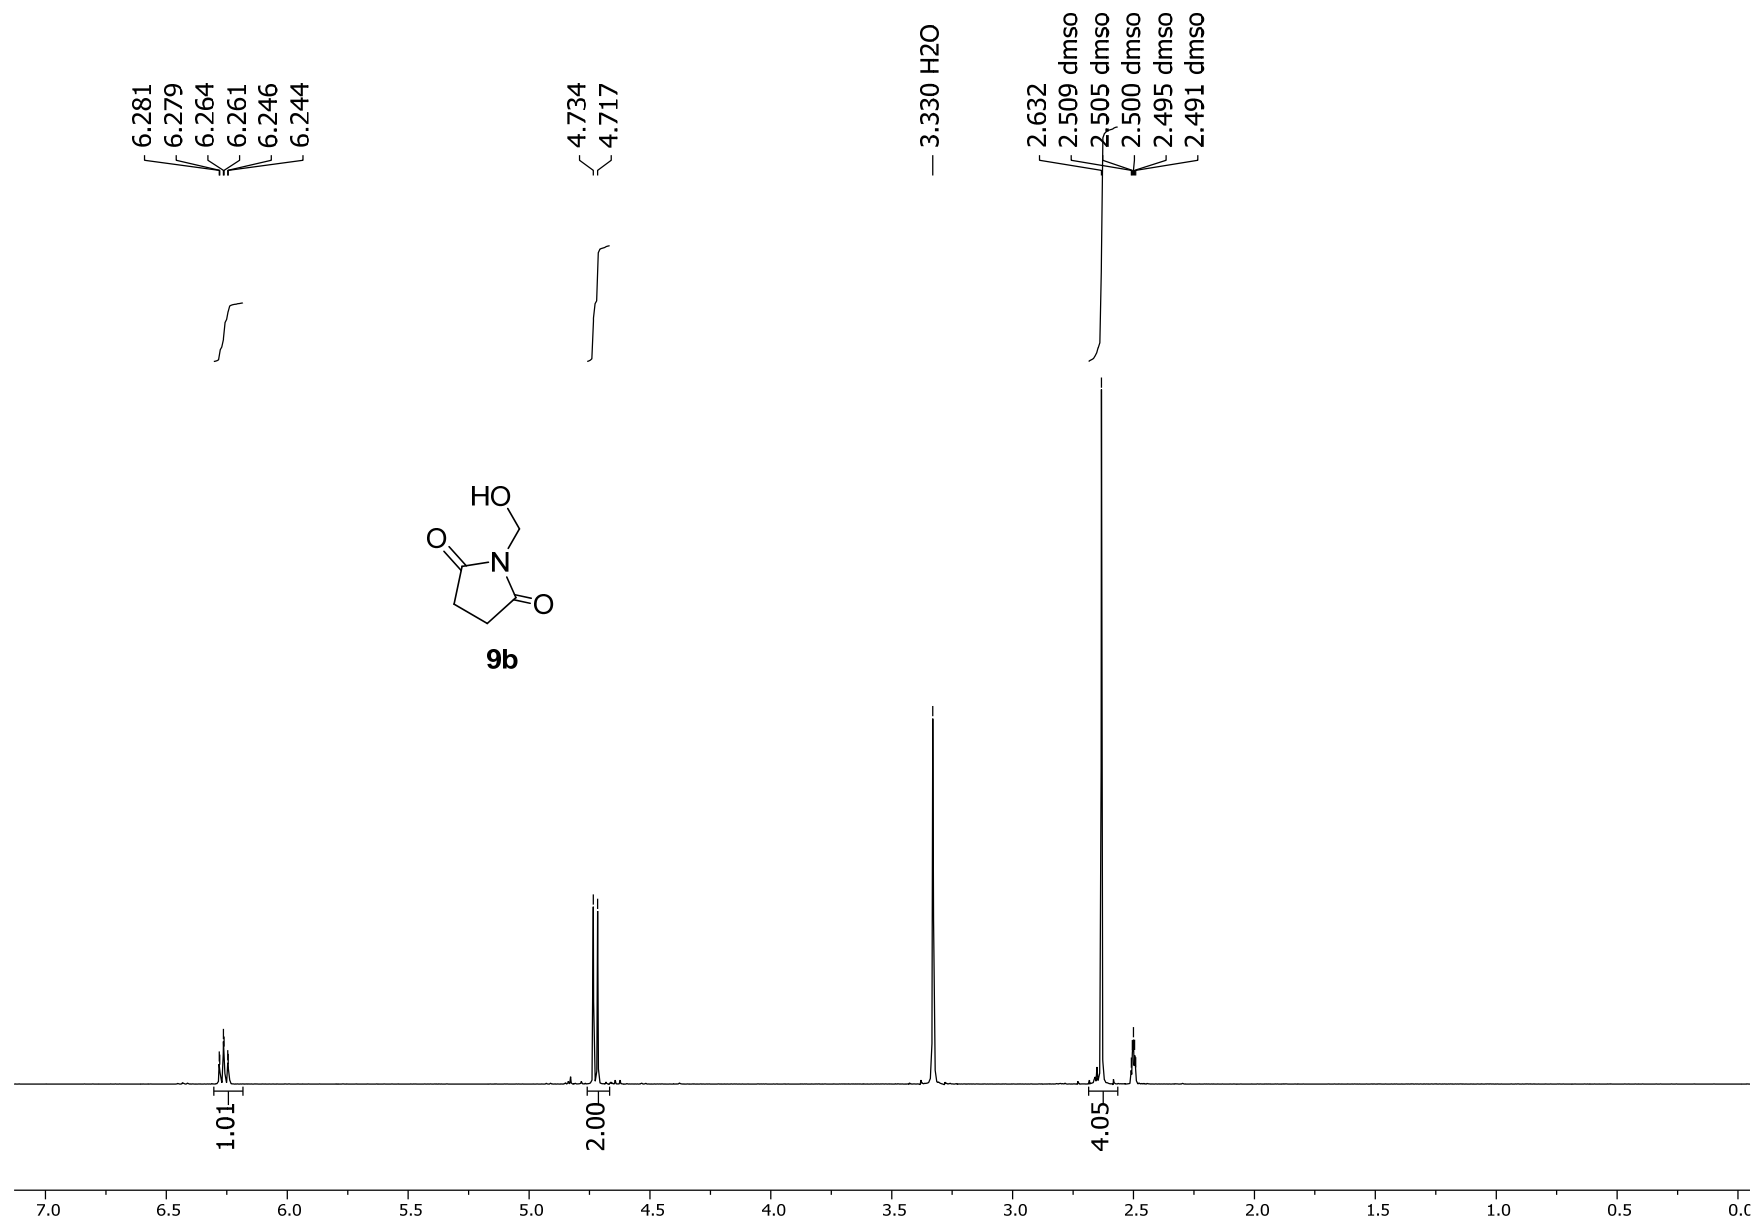

<sup>1</sup>H NMR spectrum of N-hydroxymethylsuccinimide (**9b**); 400 MHz/DMSO-d<sub>6</sub>; δ (ppm).

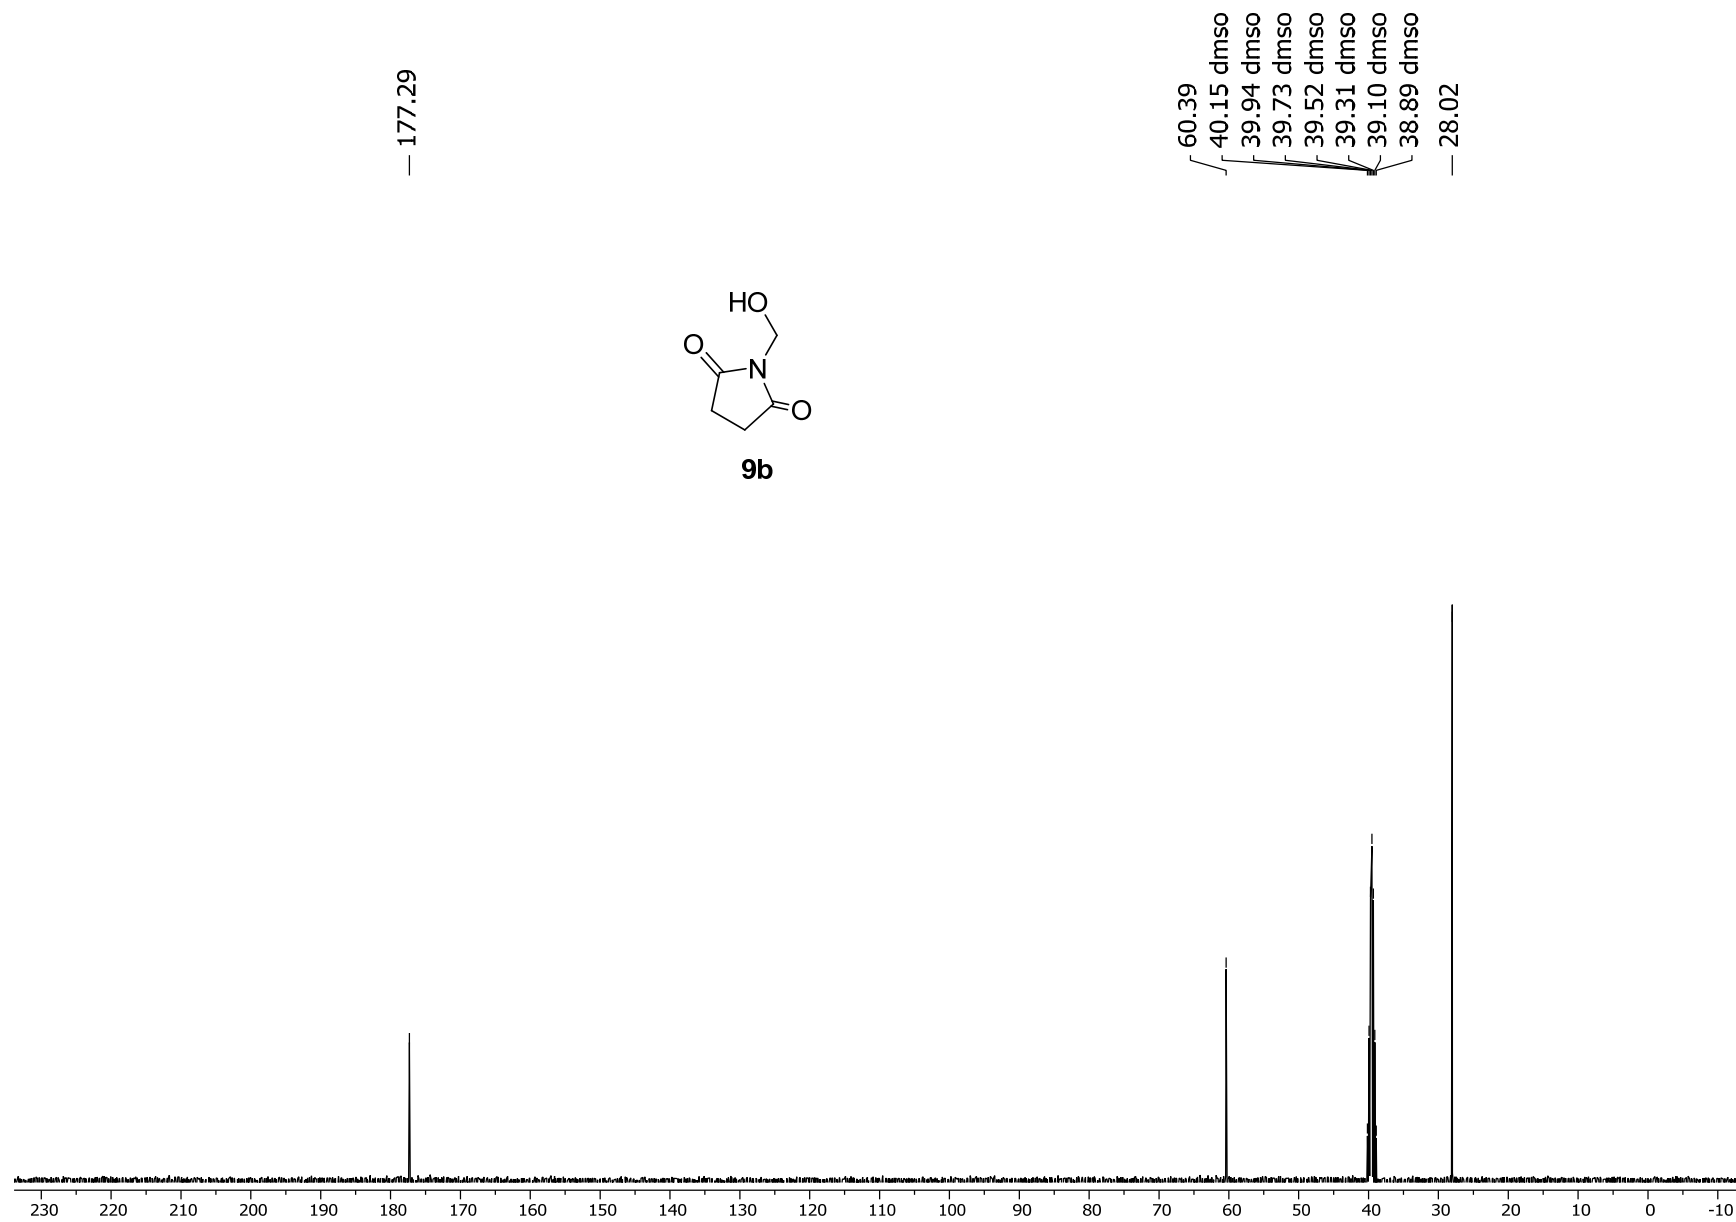

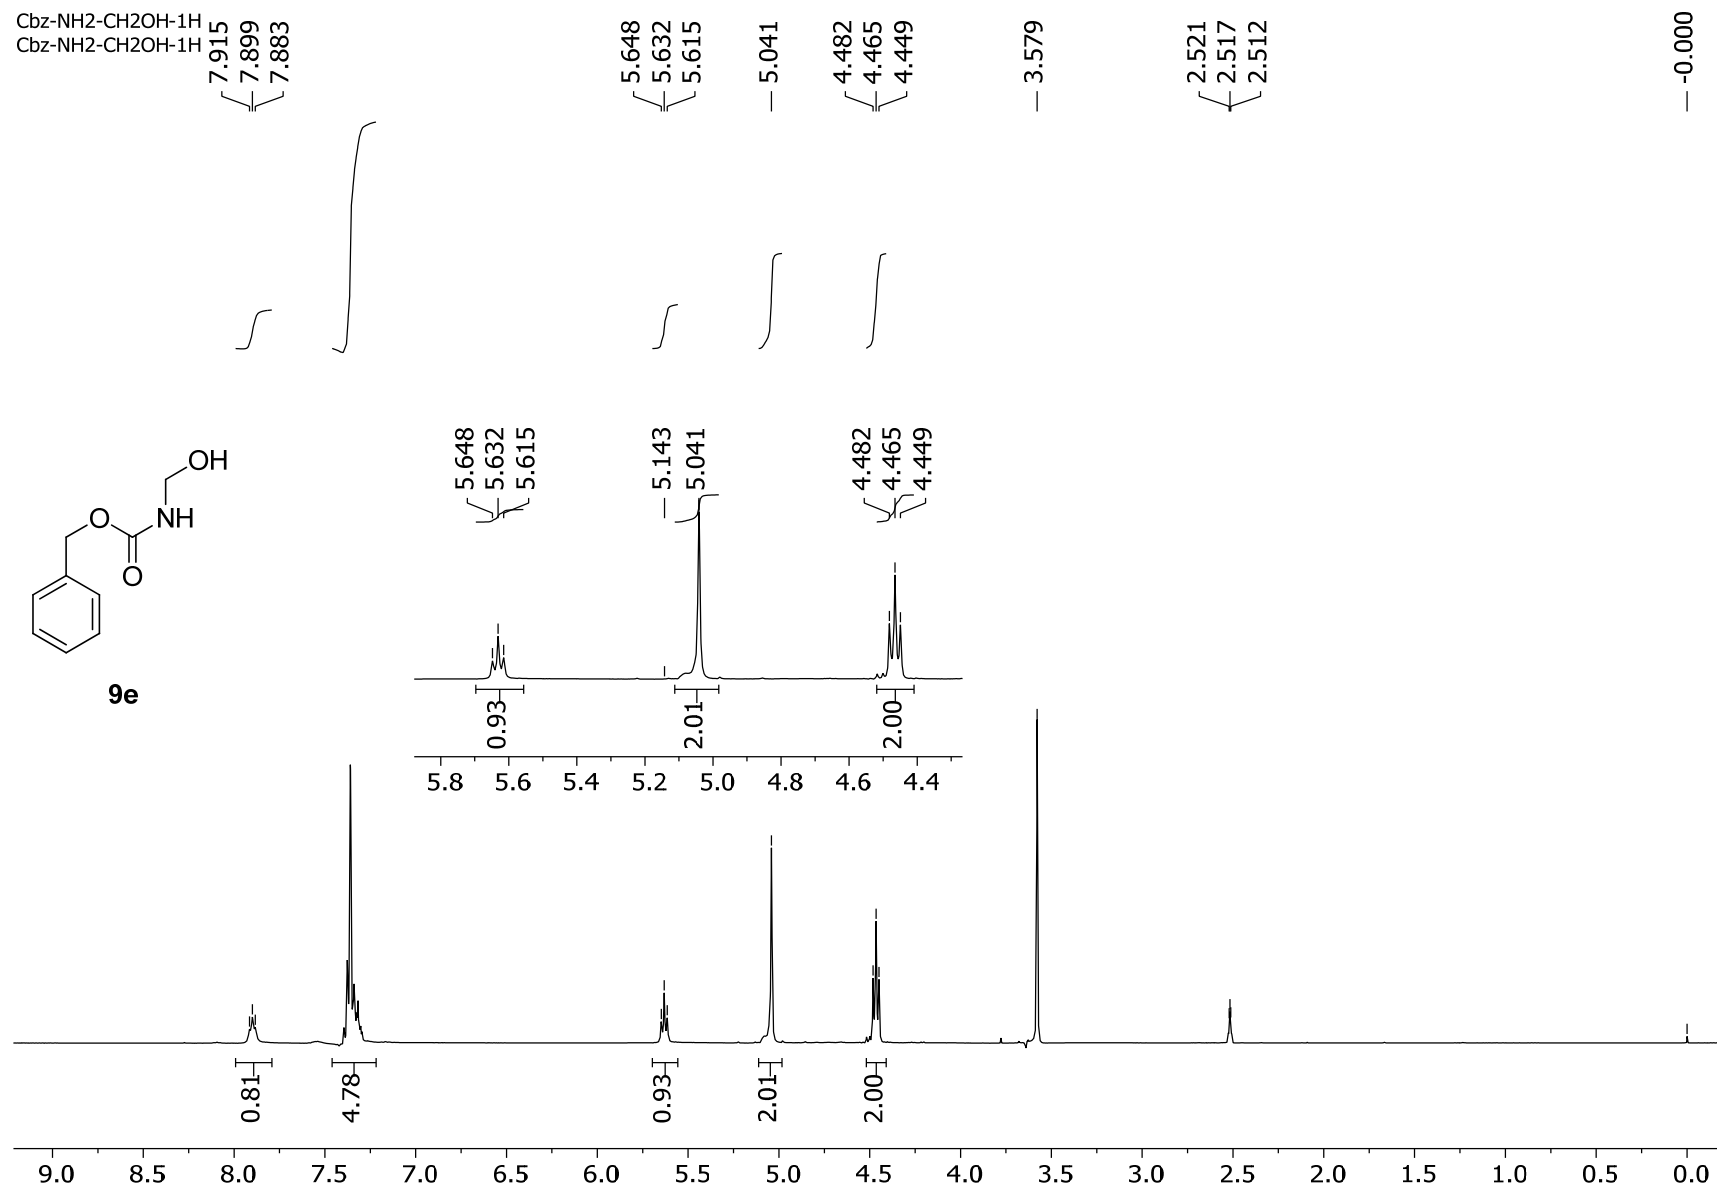

$\text{Cbz-NH}_2\text{-CH}_2\text{OH}$   $\text{C}$   
 $\text{Cbz-NH}_2\text{-CH}_2\text{OH}$   $\text{iso}$   
 — 155.993

— 136.944  
 { 128.332  
 { 127.808  
 { 127.729

{ 65.218  
 { 64.419

{ 39.870  
 { 39.661  
 { 39.452  
 { 39.243  
 { 39.034  
 { 38.824  
 { 38.615

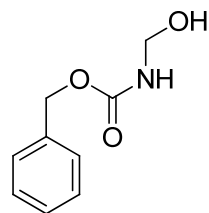

**9e**

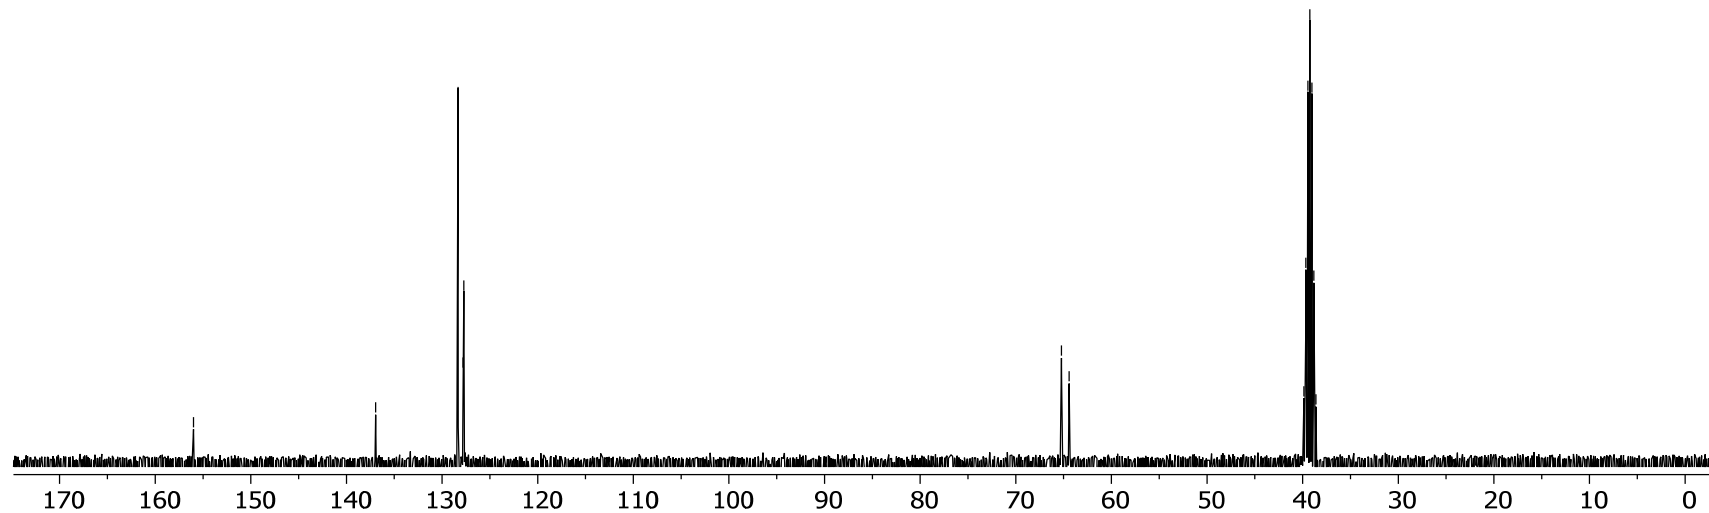

$^{13}\text{C}\{^1\text{H}\}$  NMR spectrum of benzyl *N*-hydroxymethylcarbamate (**9e**); 100 MHz/DMSO- $\text{d}_6$ ;  $\delta$  (ppm).



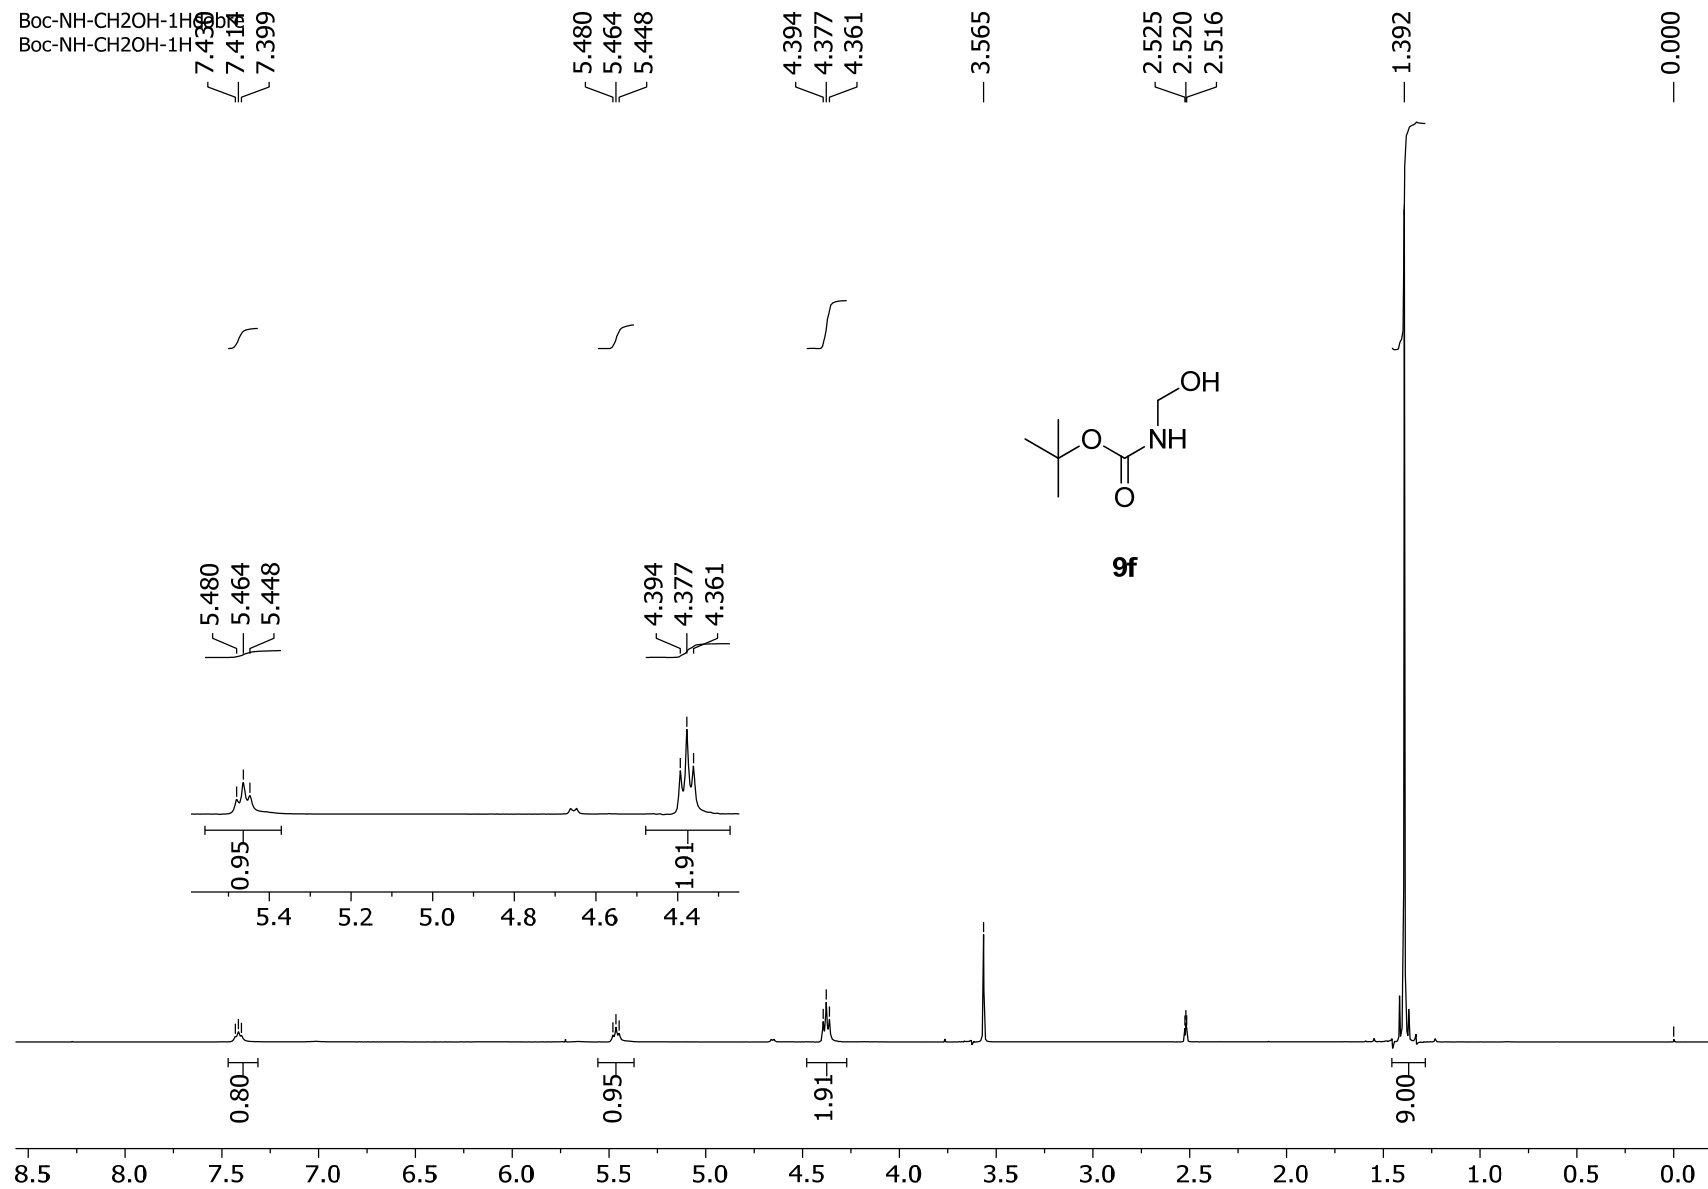

$^1\text{H}$  NMR spectrum of *tert*-butyl *N*-hydroxymethylcarbamate (**9f**); 400 MHz/DMSO- $\text{d}_6$ ;  $\delta$  (ppm).

Boc-NH-CH<sub>2</sub>OH-13cdobre  
Boc-NH-CH<sub>2</sub>OH-13C

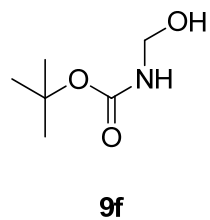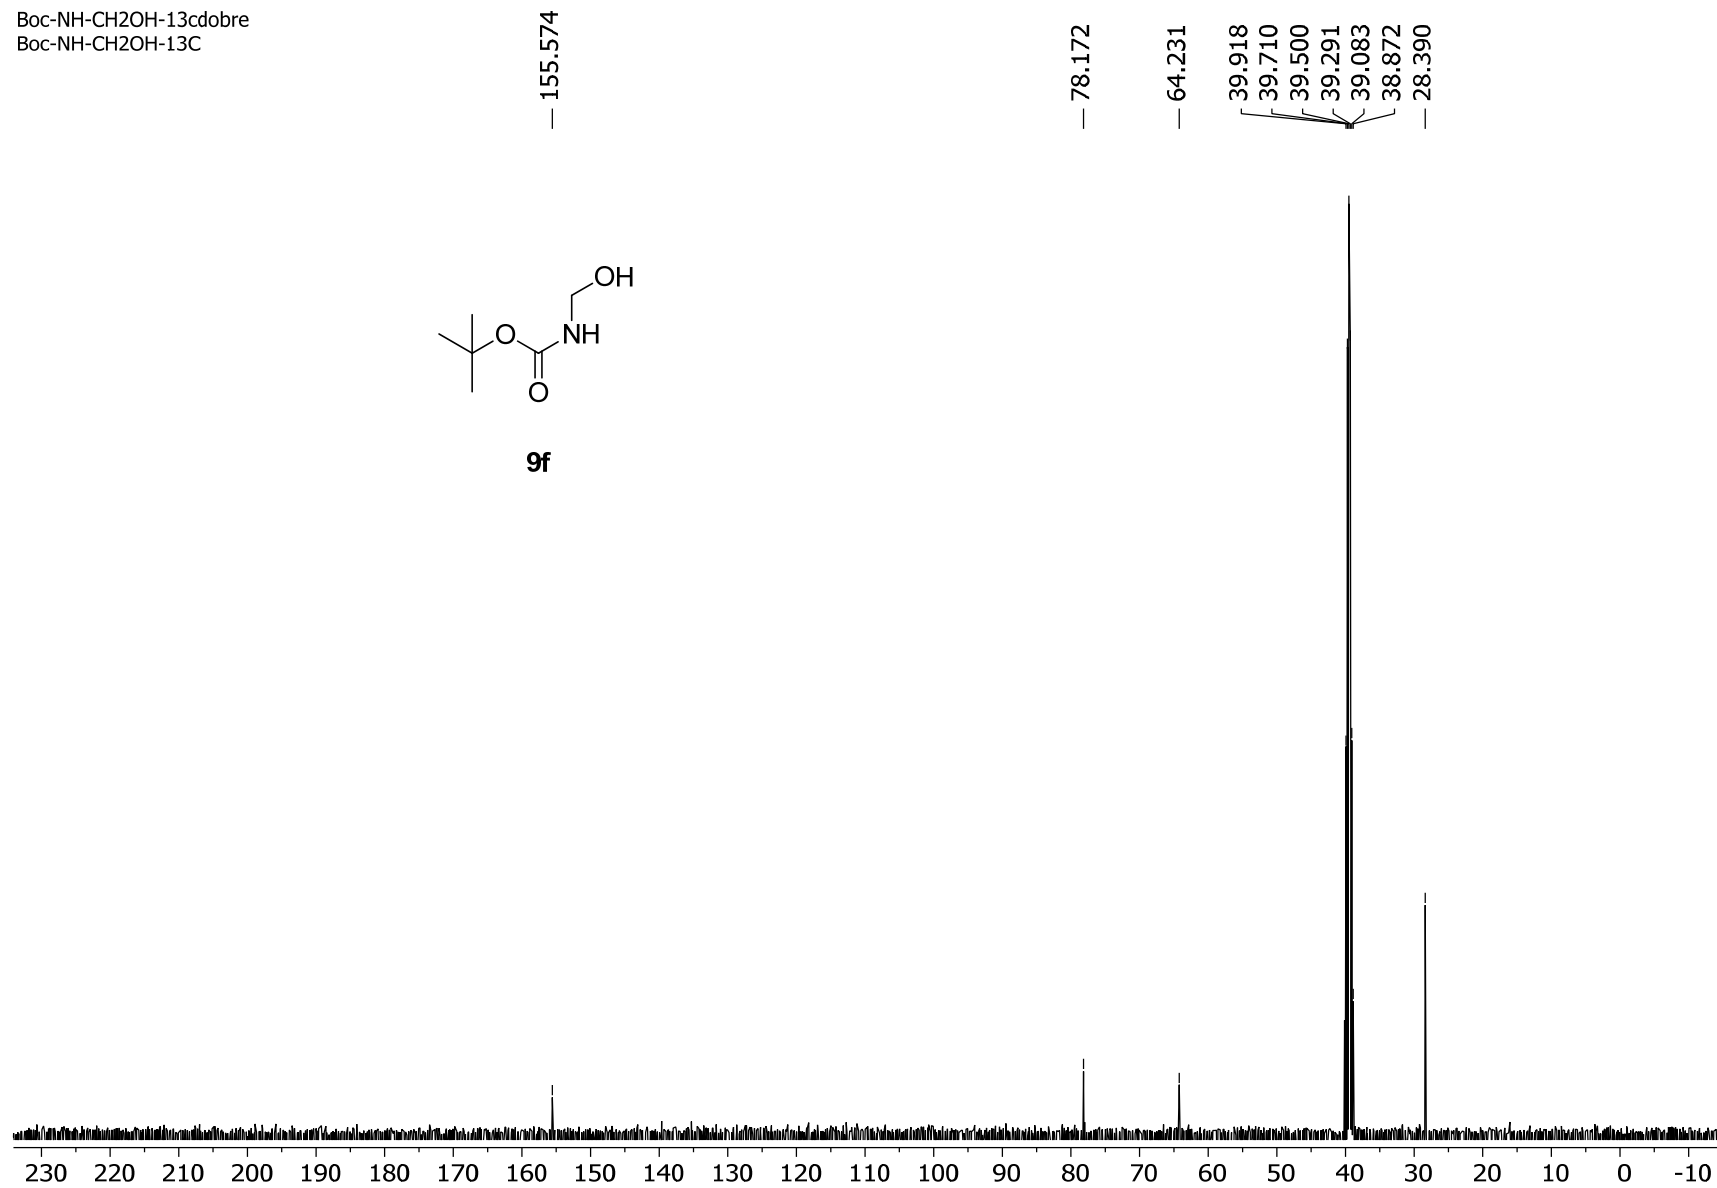

<sup>13</sup>C{<sup>1</sup>H} NMR spectrum of *tert*-butyl *N*-hydroxymethylcarbamate (**9f**); 100 MHz/DMSO-d<sub>6</sub>; δ (ppm).

Pyr-NCH<sub>2</sub>OH-frgl  
Pyr-NCH<sub>2</sub>OH-frgl

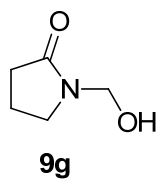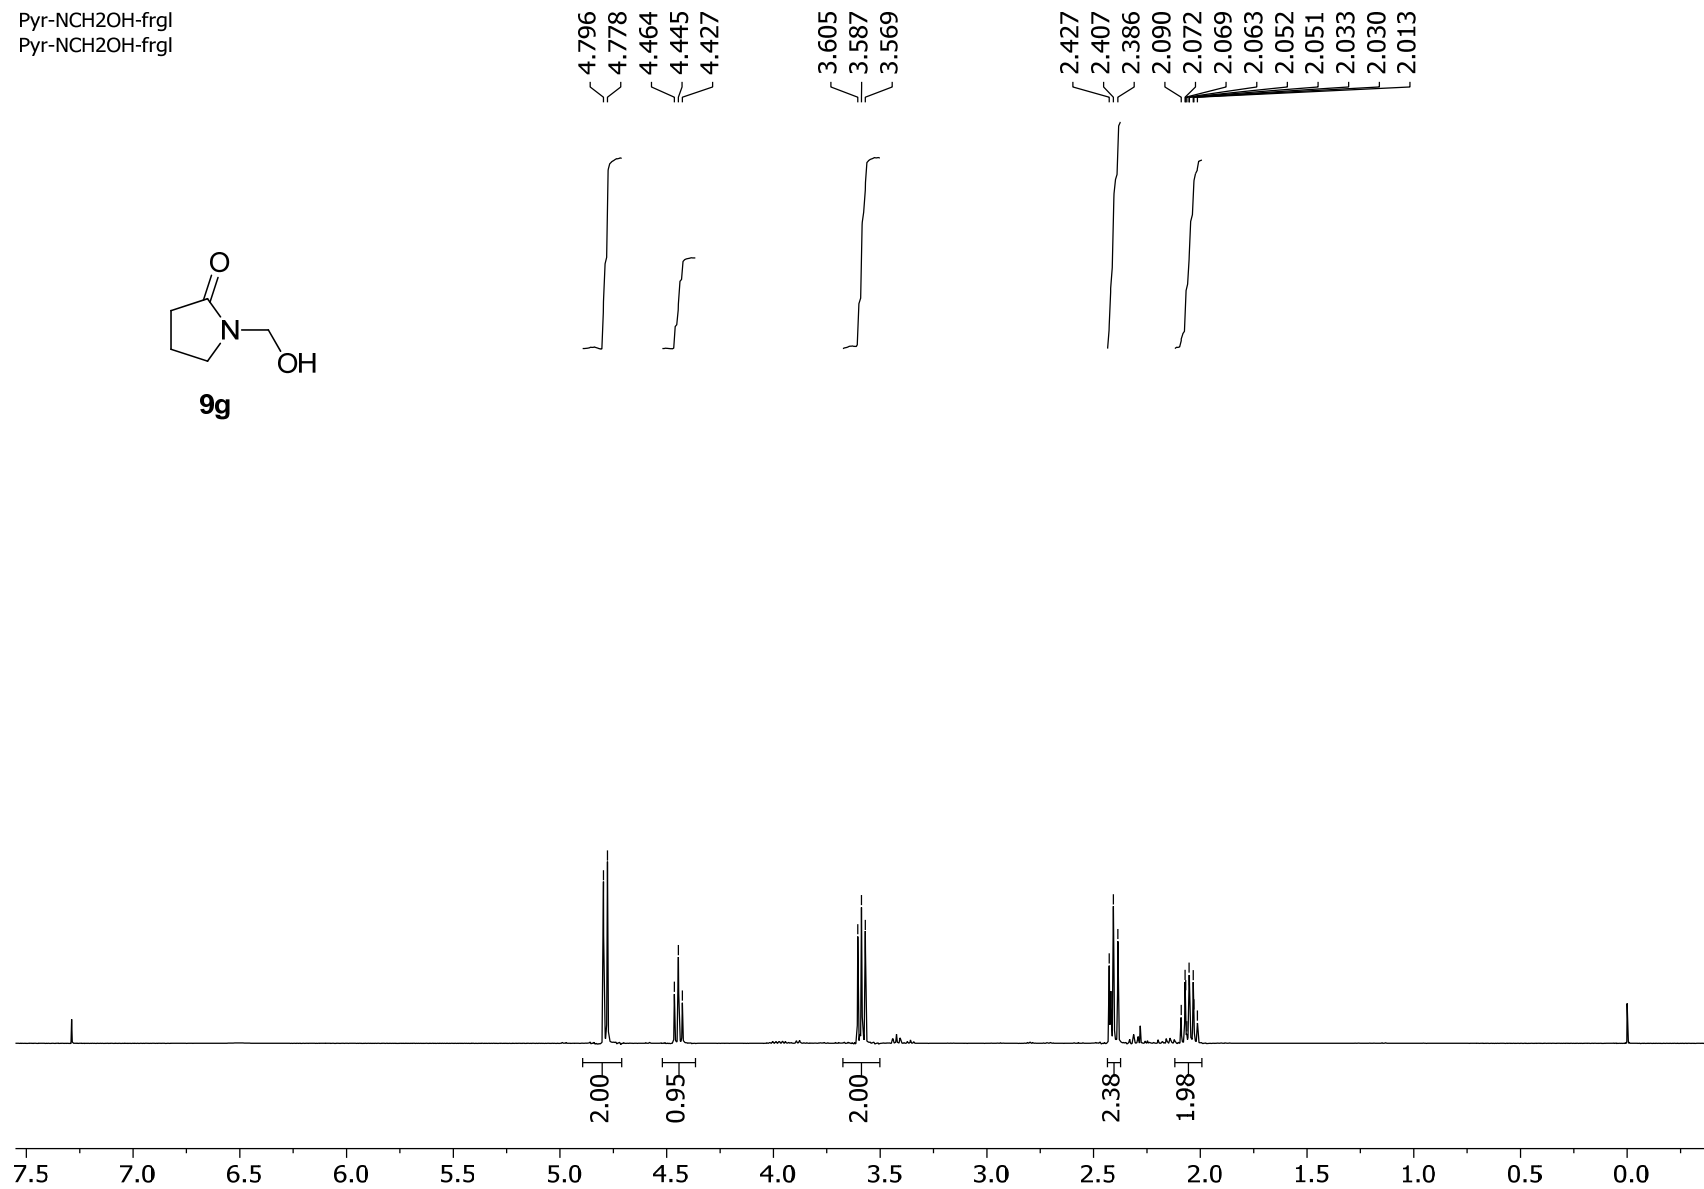

<sup>1</sup>H NMR spectrum of *N*-hydroxymethyl-2-pyrrolidone (**9g**); 400 MHz/CDCl<sub>3</sub>; δ (ppm).

Pyr-NCH<sub>2</sub>OH-frg-13c  
Pyr-NCH<sub>2</sub>OH-frg-13C

176.839

77.320  
77.002  
76.684

66.435

46.144

31.277

17.831

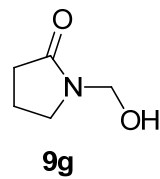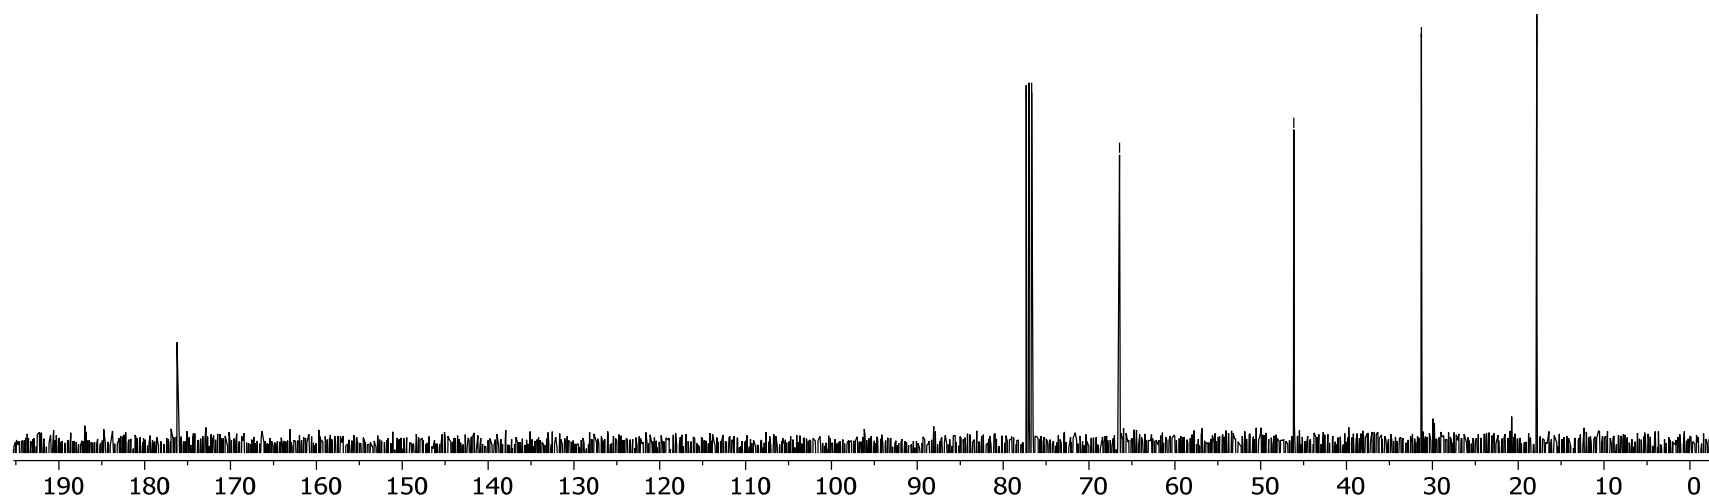

<sup>13</sup>C{<sup>1</sup>H} NMR spectrum of *N*-hydroxymethyl-2-pyrrolidone (**9g**); 100 MHz/CDCl<sub>3</sub>; δ (ppm).

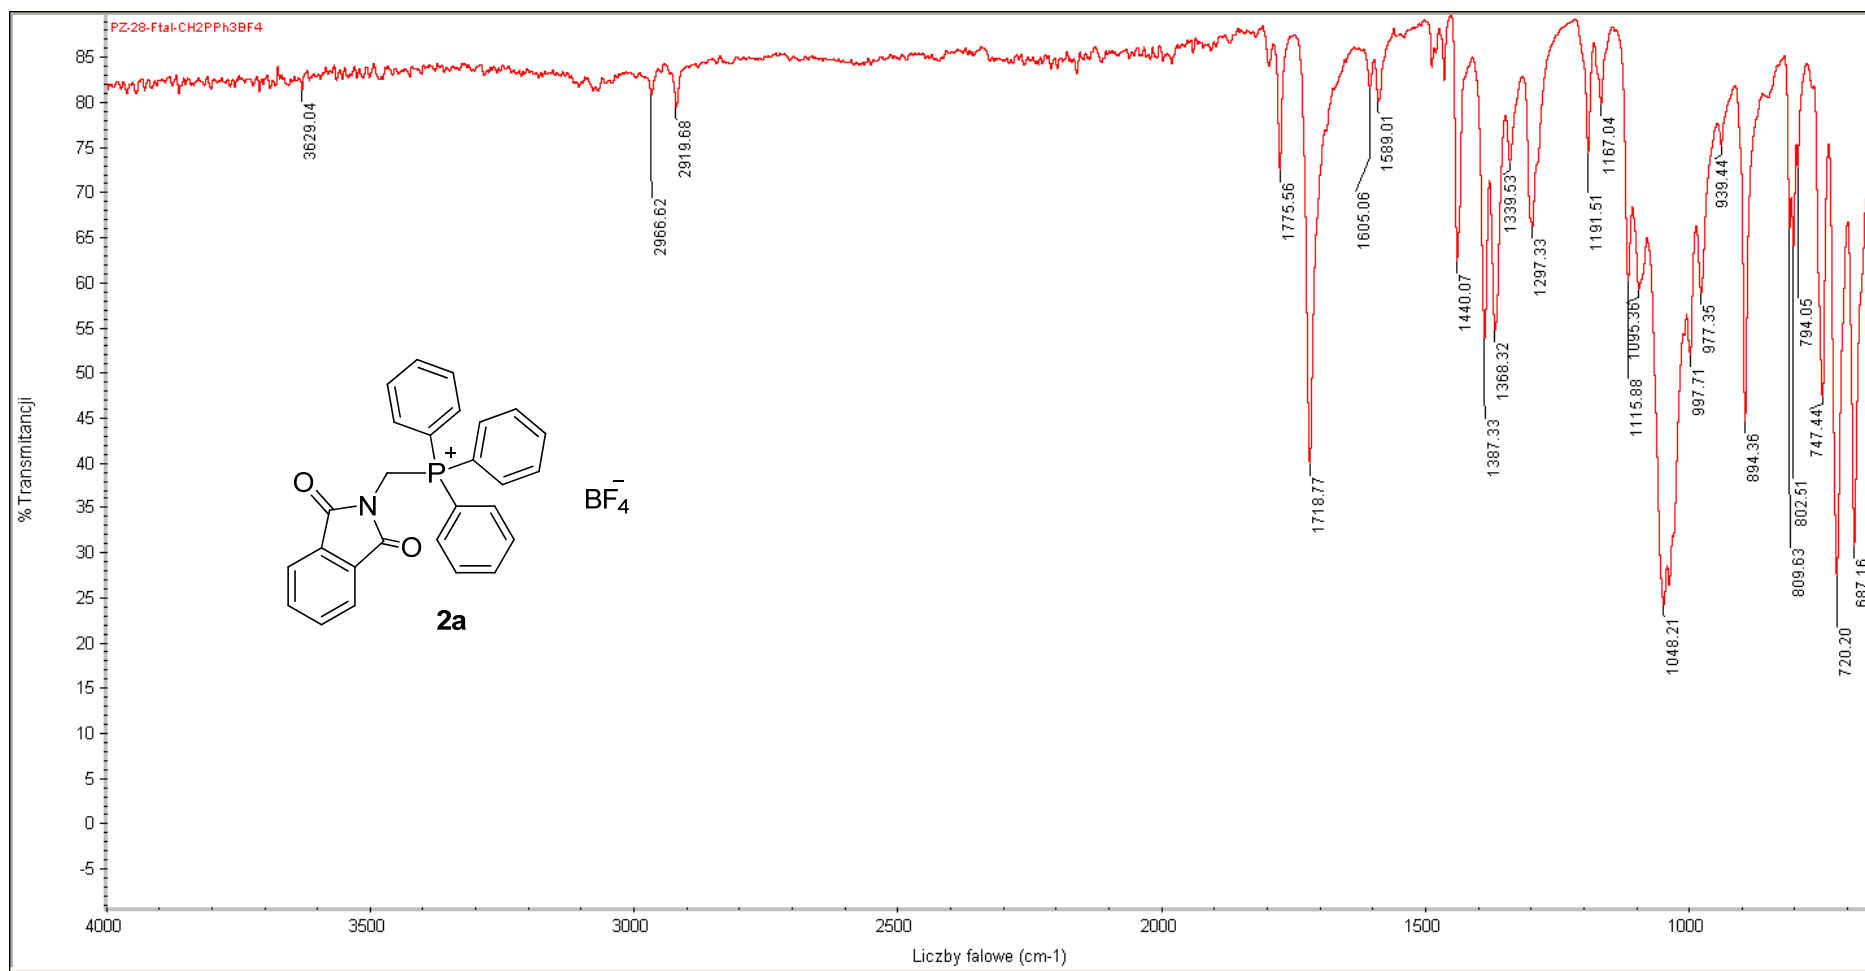

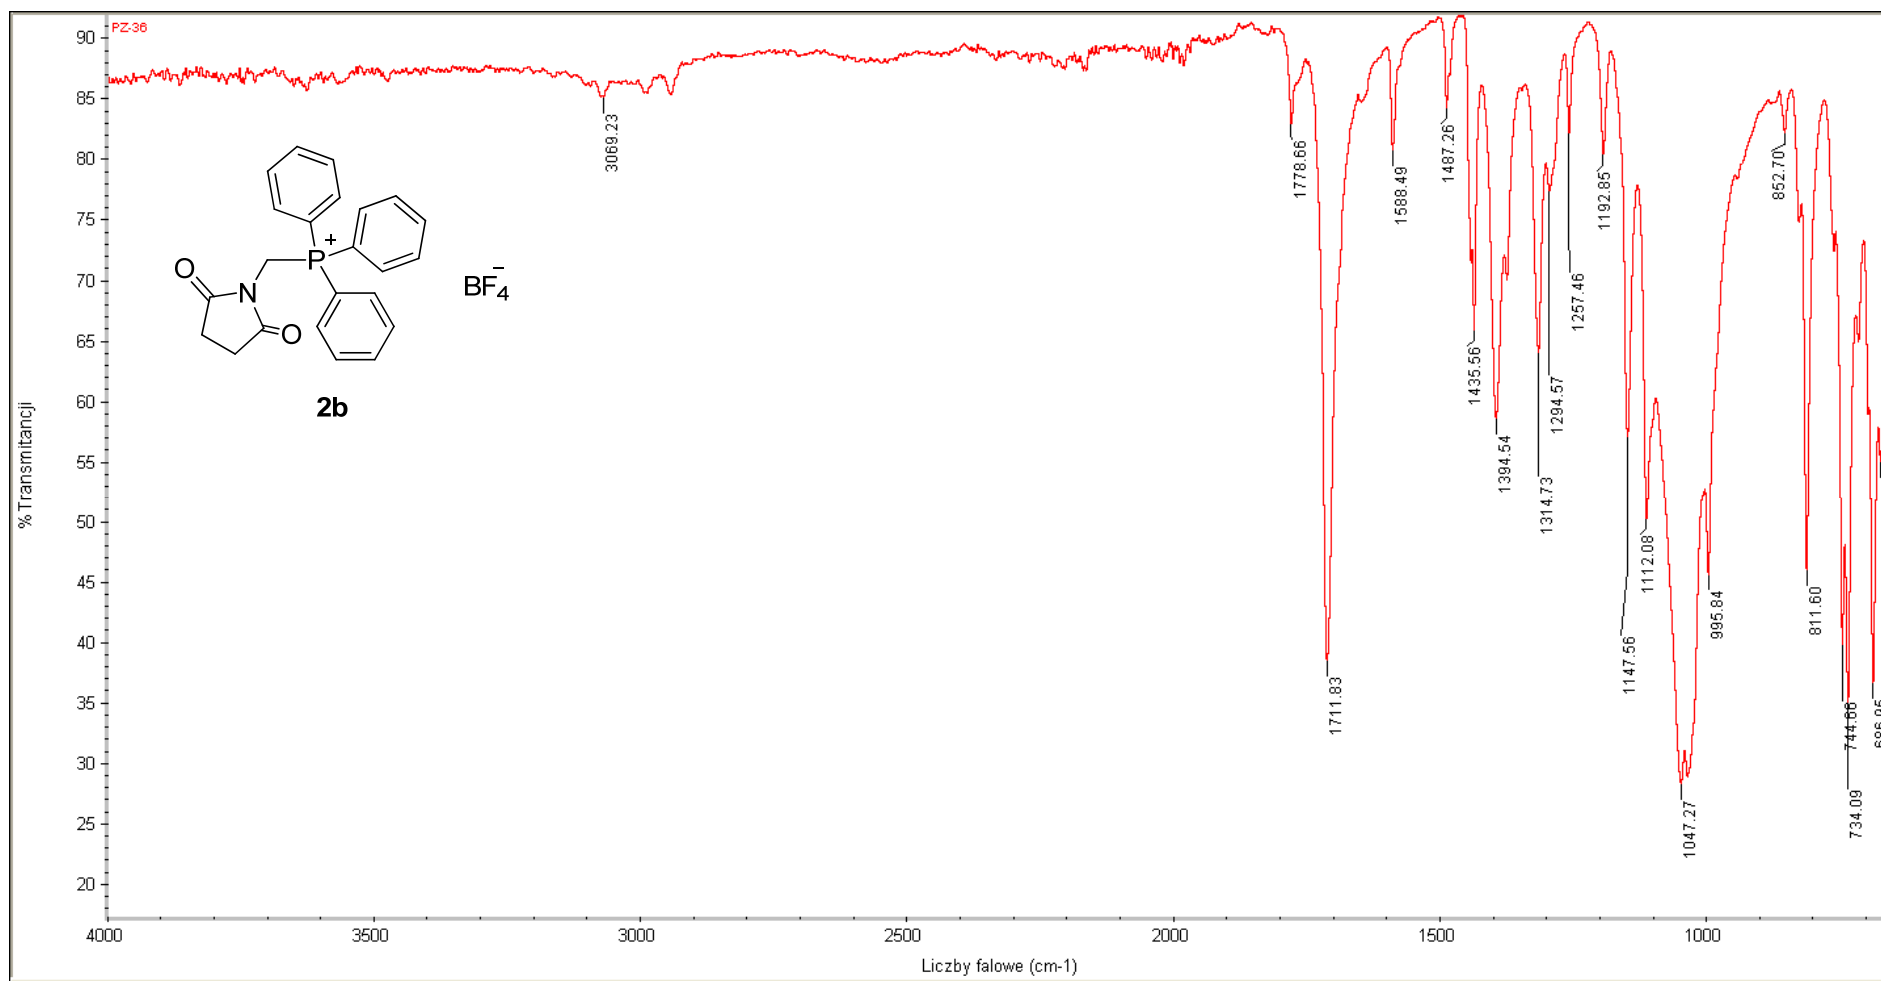

IR spectrum of 1-(*N*-succinimido)methyltriphenylphosphonium tetrafluoroborate (**2b**); ATR (cm⁻¹).

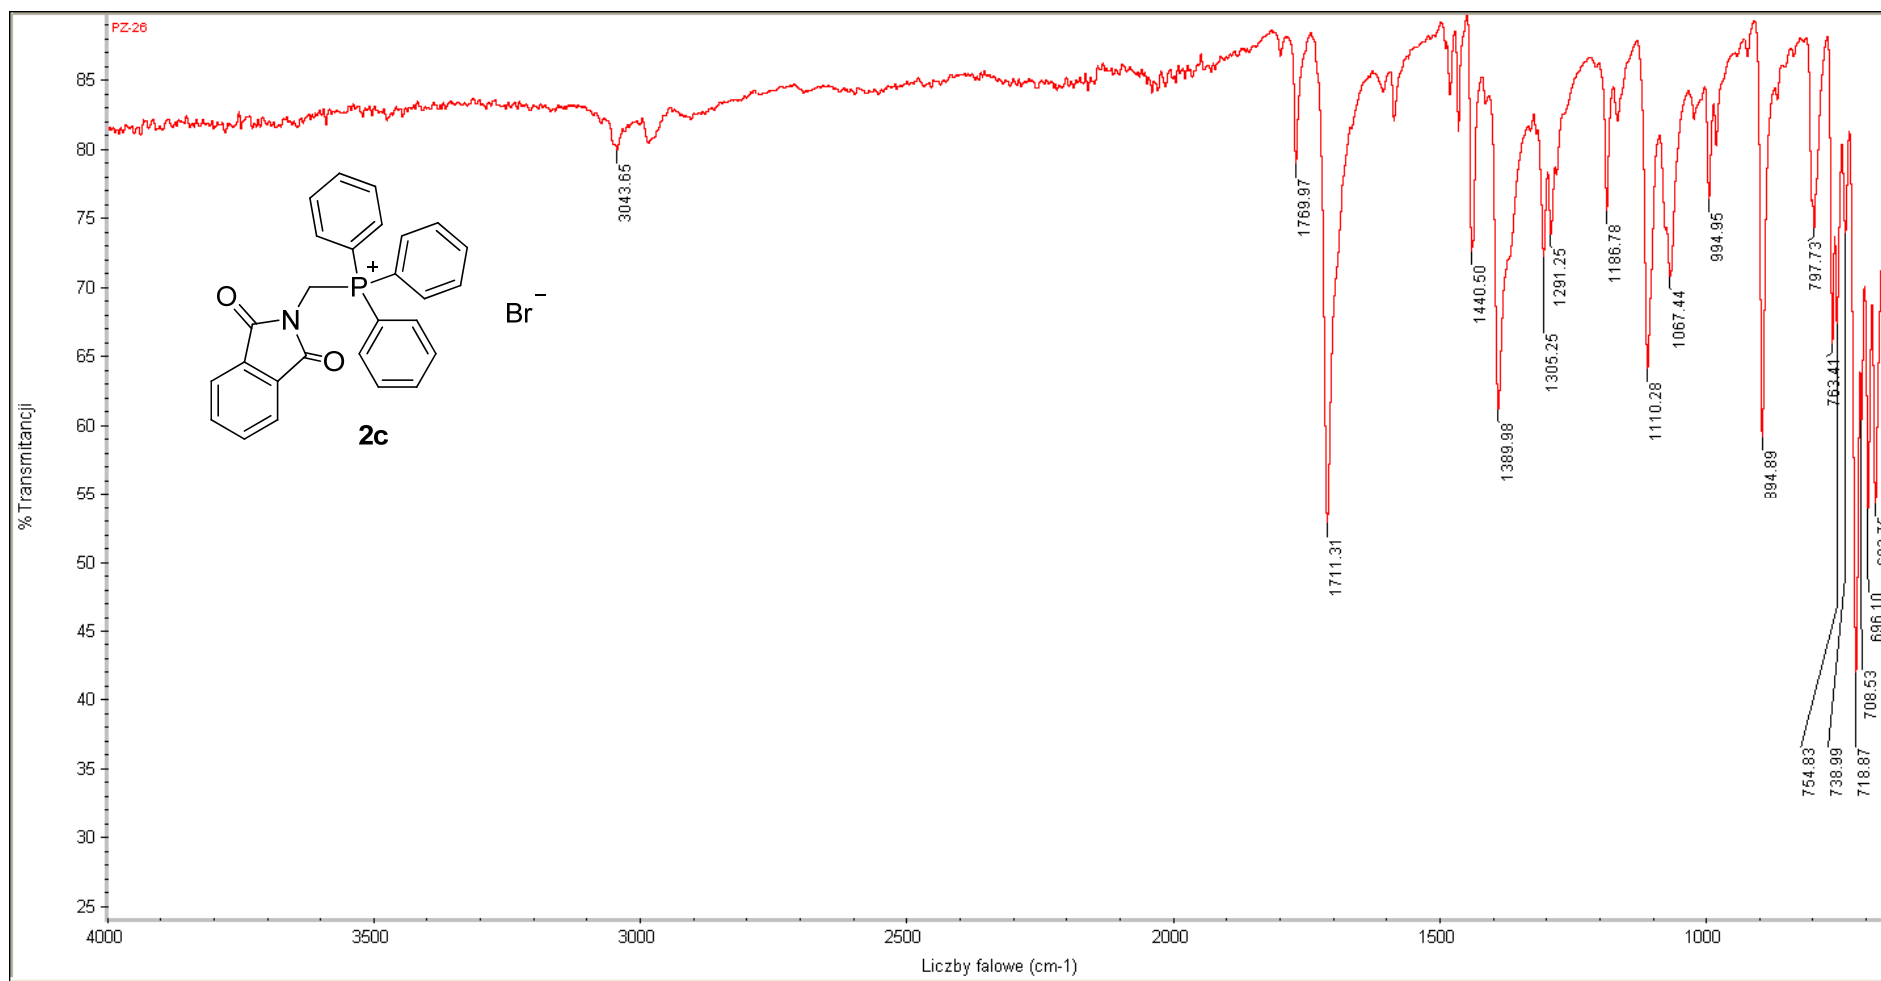

IR spectrum of 1-(*N*-phthalimido)methyltriphenylphosphonium bromide (**2c**); ATR (cm⁻¹).

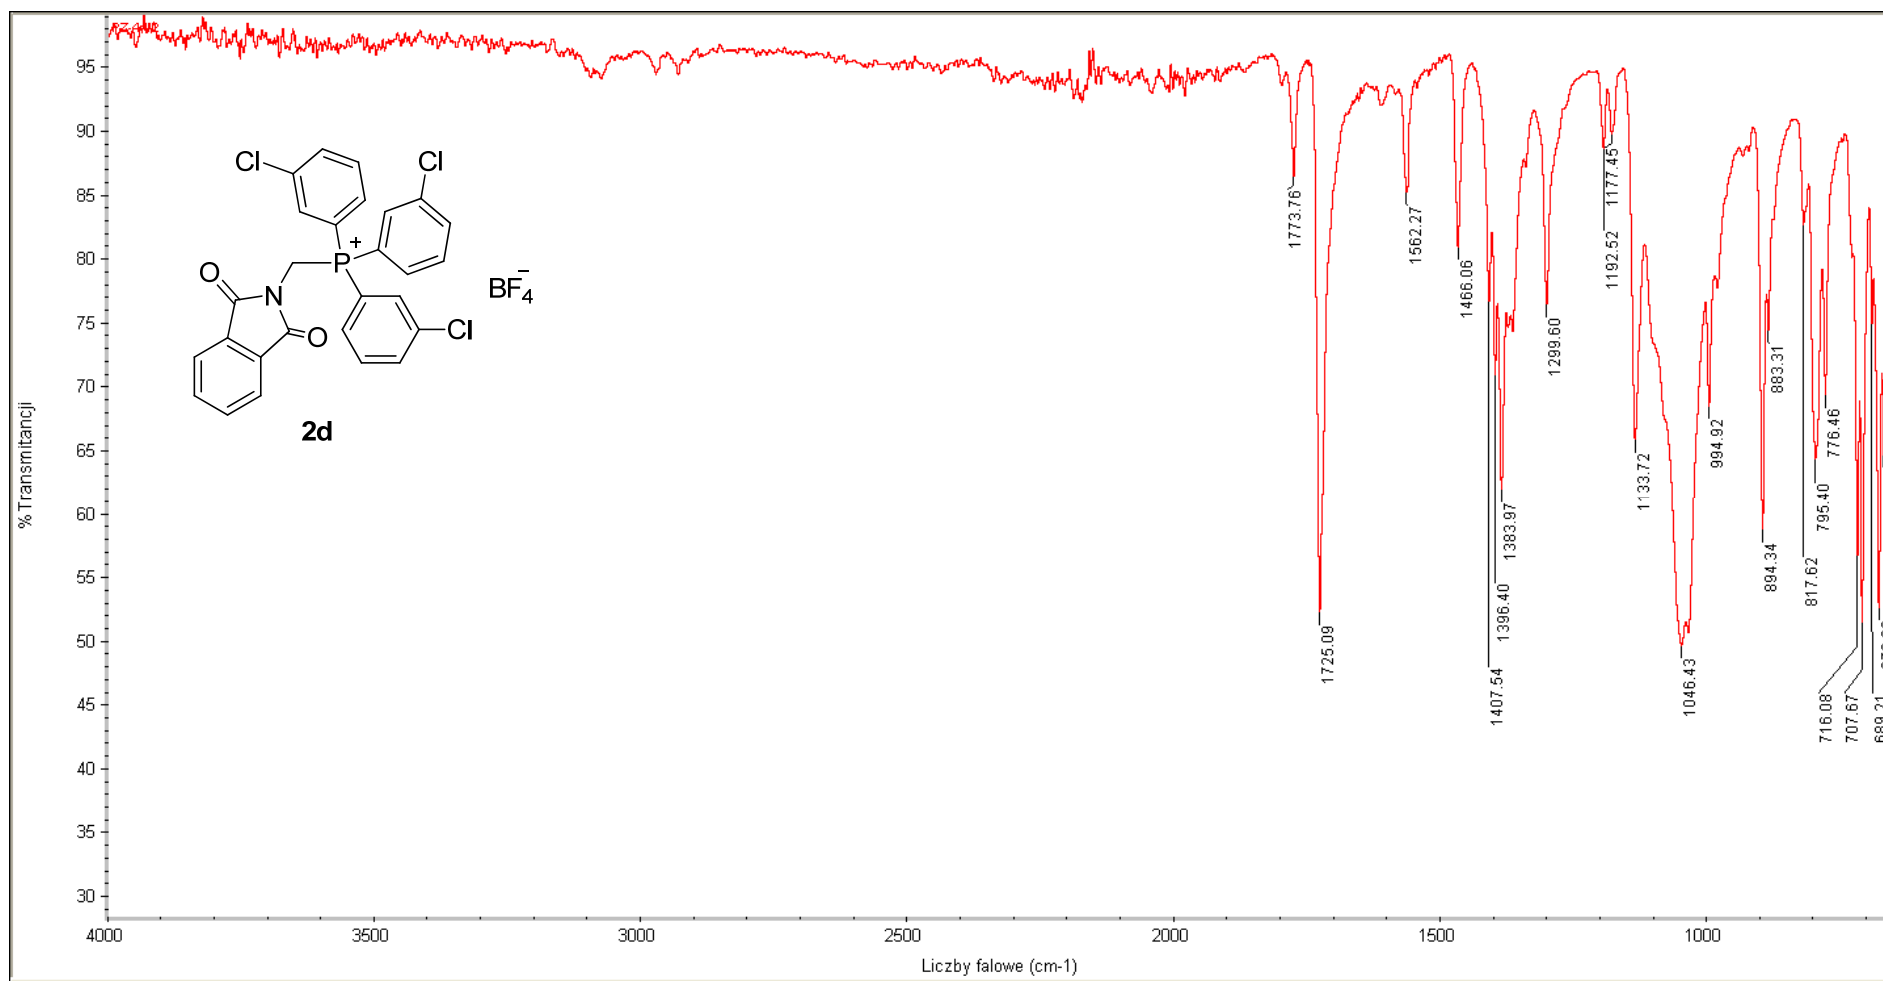

IR spectrum of 1-(*N*-phthalimido)methyltris(3-chlorophenyl)phosphonium tetrafluoroborate (**2d**); ATR (cm<sup>-1</sup>).



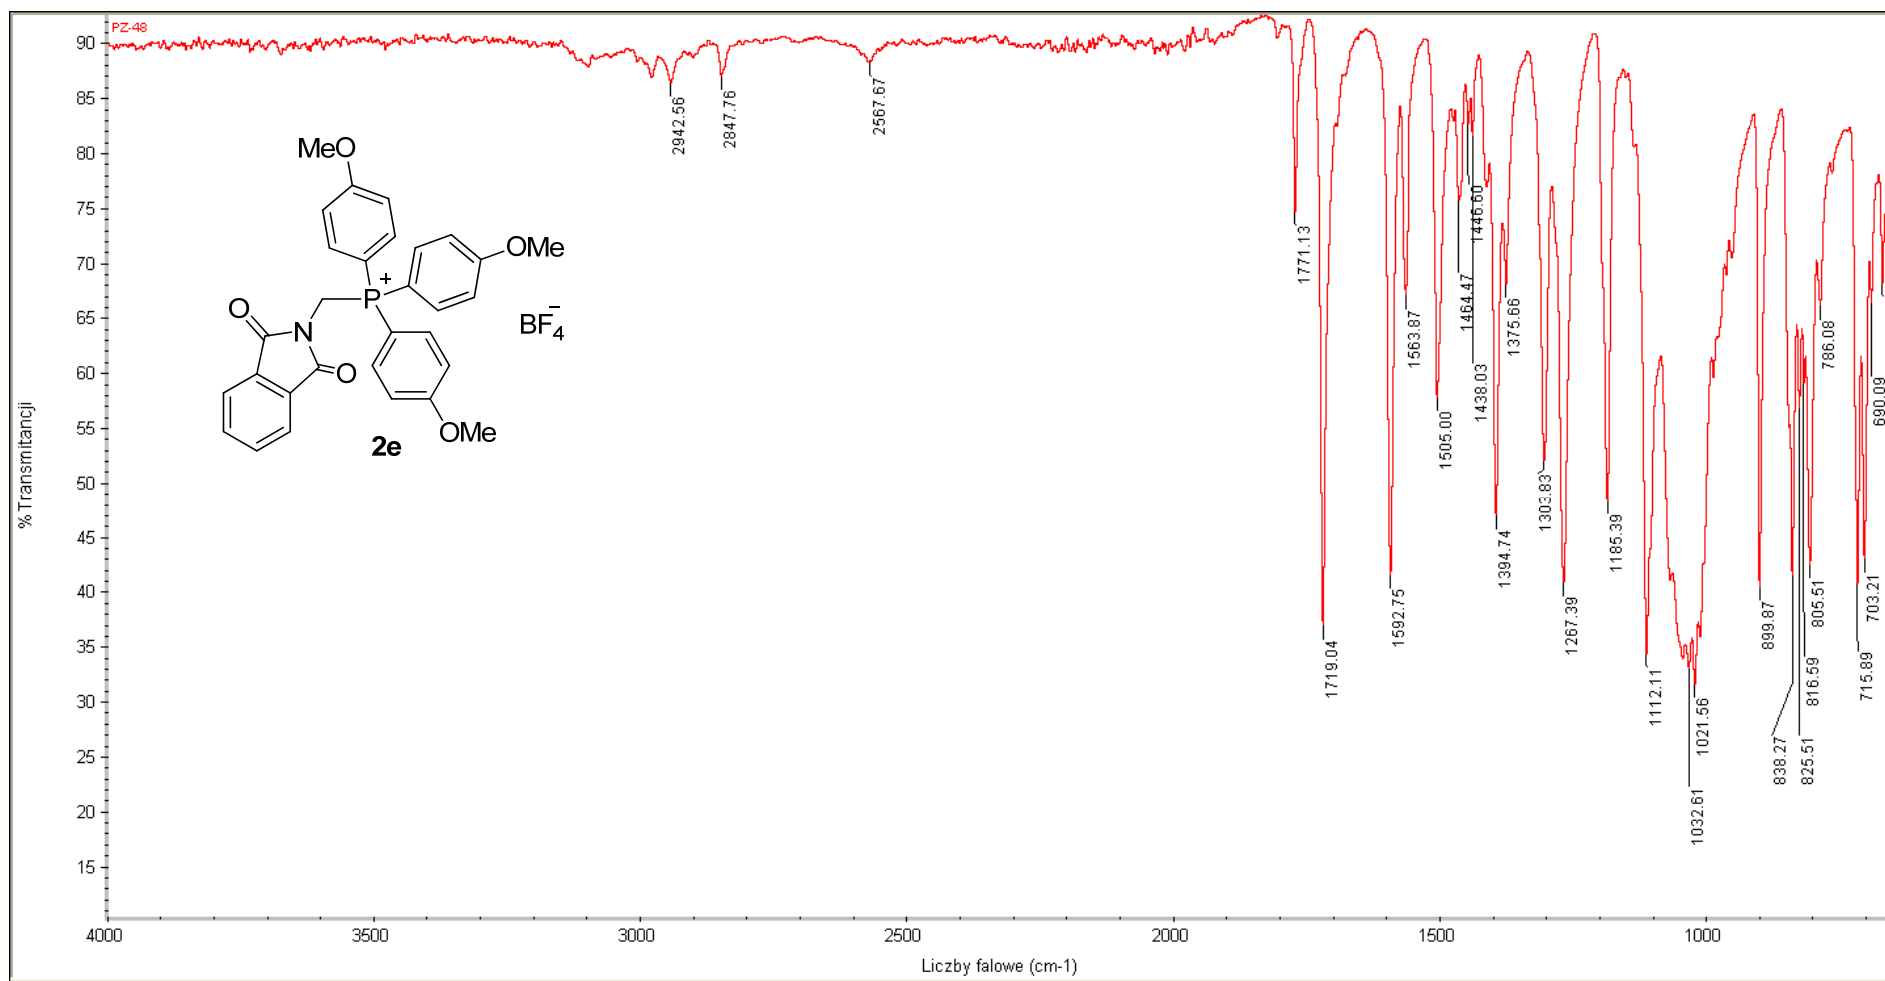

IR spectrum of 1-(*N*-phthalimido)methyltris(4-methoxyphenyl)phosphonium tetrafluoroborate (**2e**); ATR (cm<sup>-1</sup>).

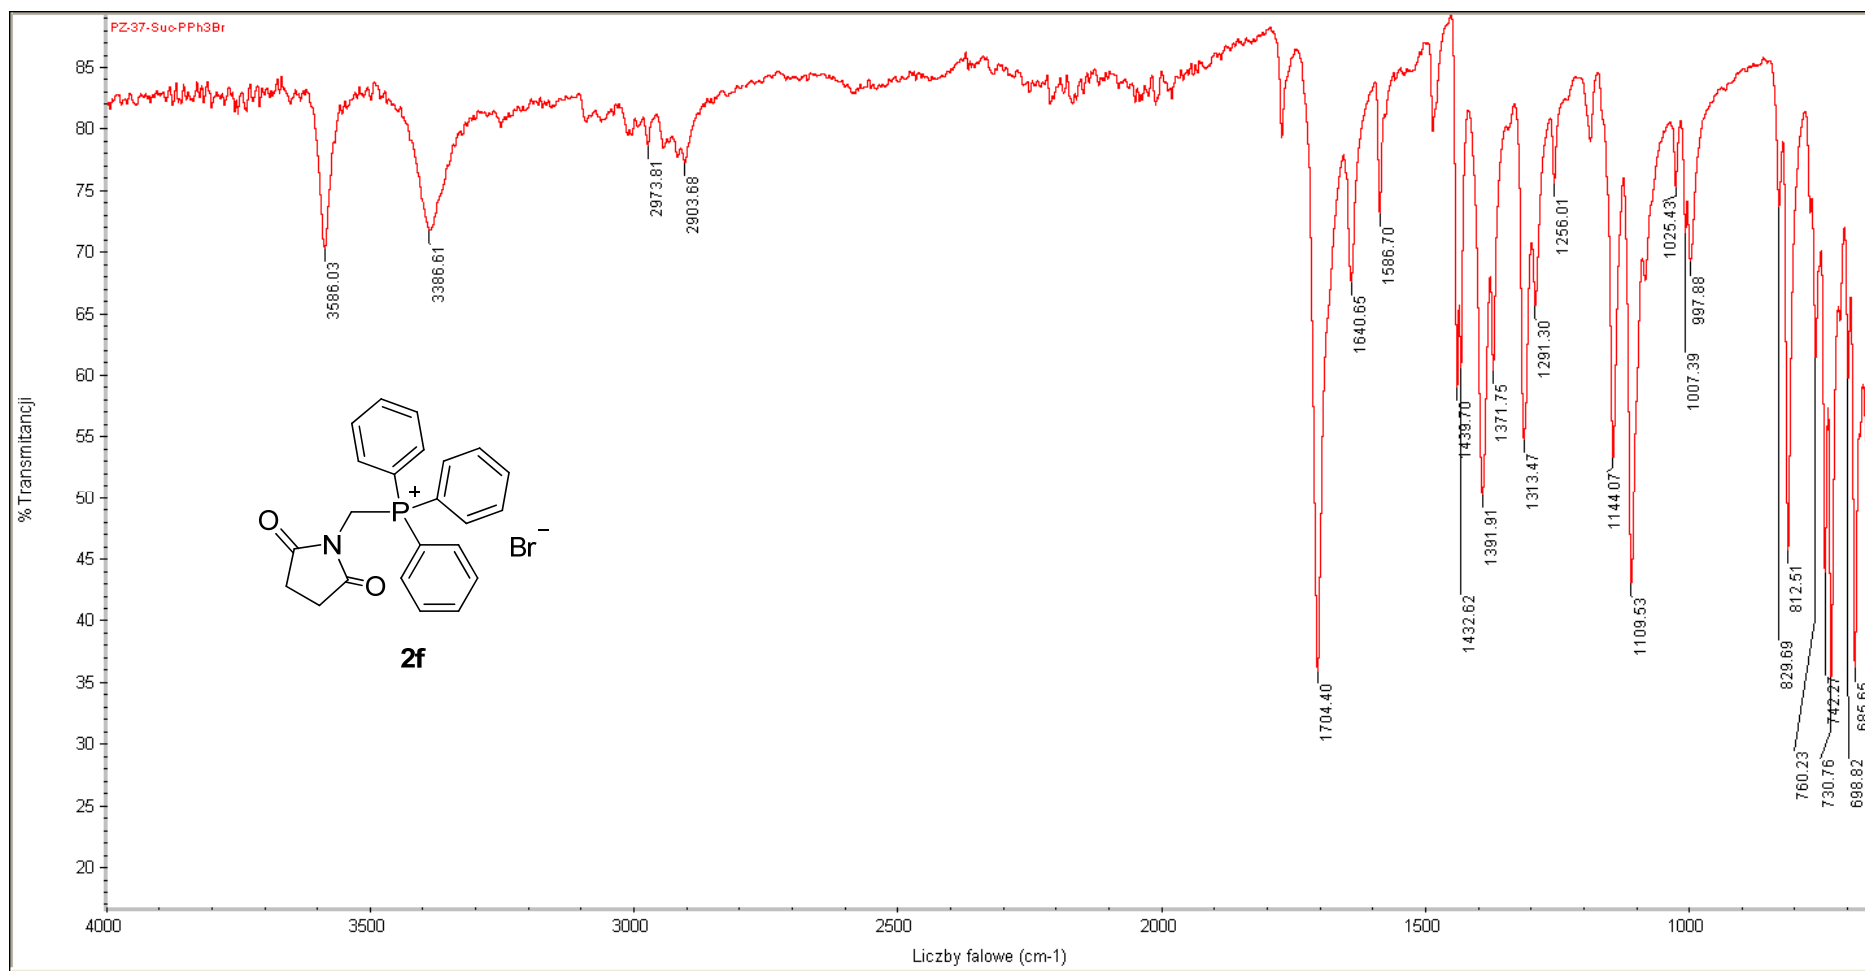

IR spectrum of 1-(*N*-succinimido)methyltriphenylphosphonium bromide (**2f**); ATR (cm<sup>-1</sup>).

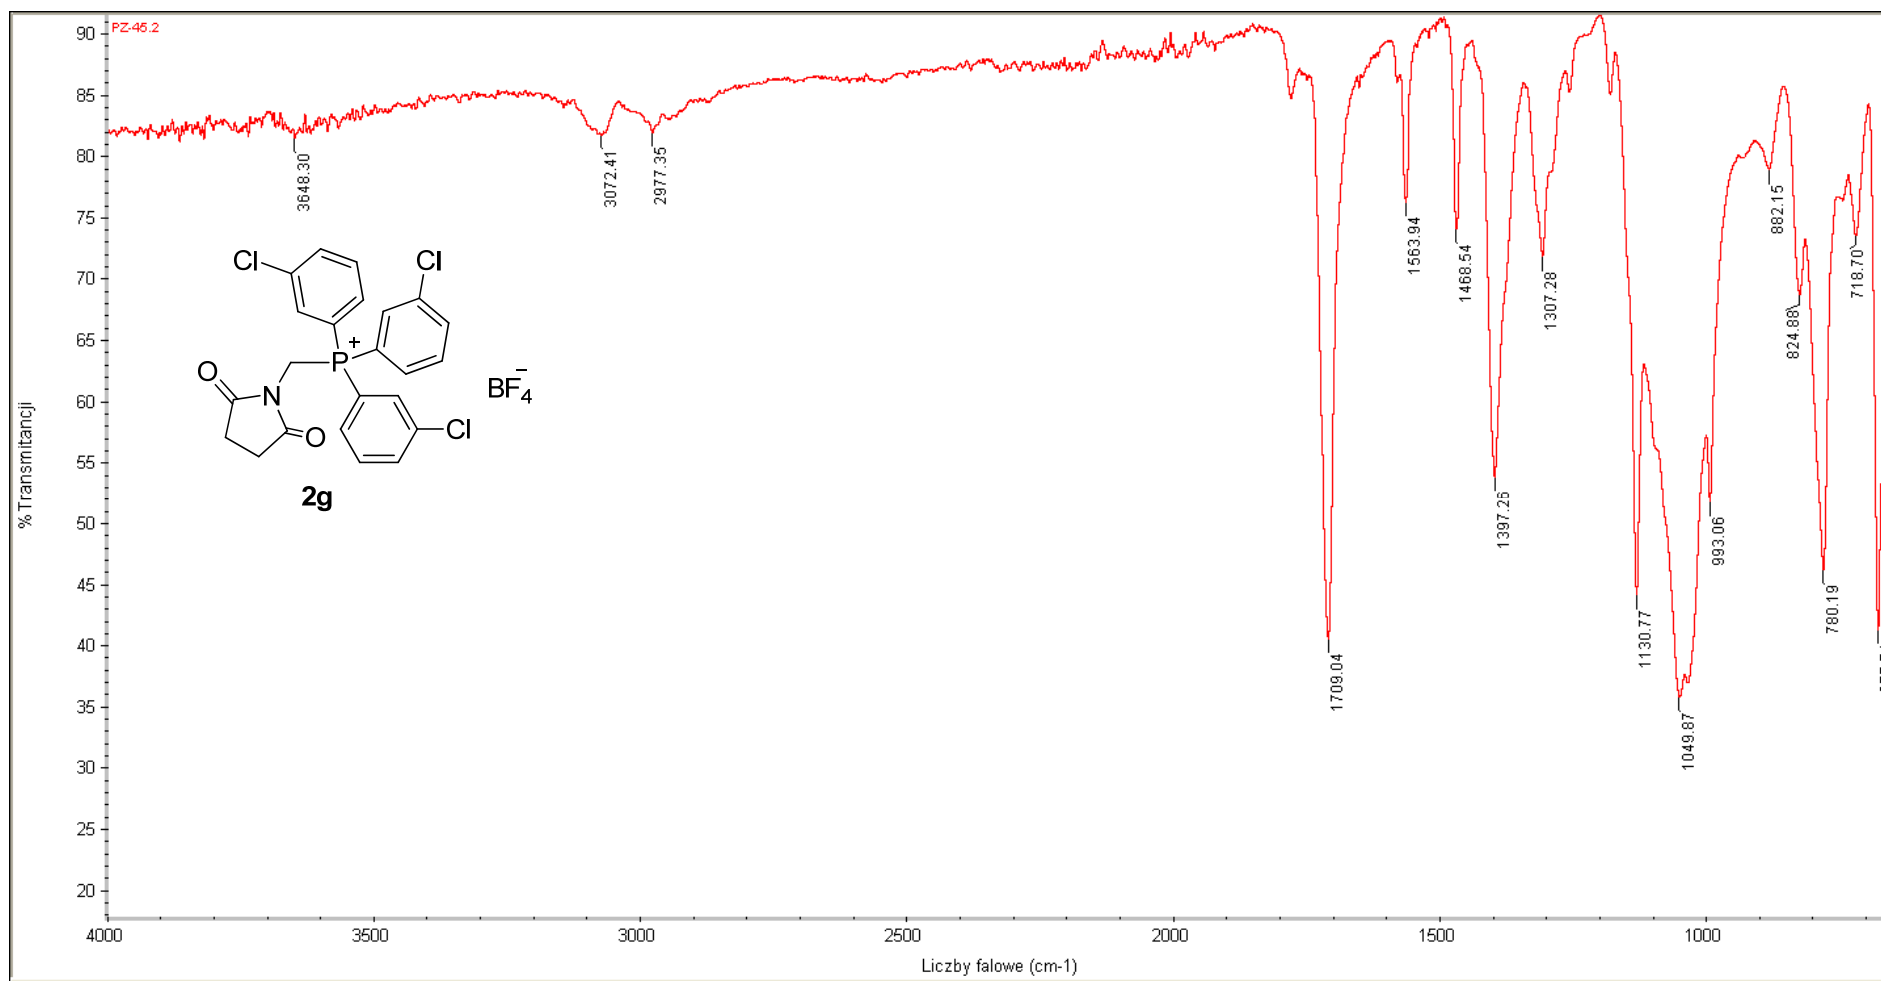

IR spectrum of 1-(*N*-succinimido)methyltris(3-chlorophenyl)phosphonium tetrafluoroborate (**2g**); ATR (cm⁻¹).

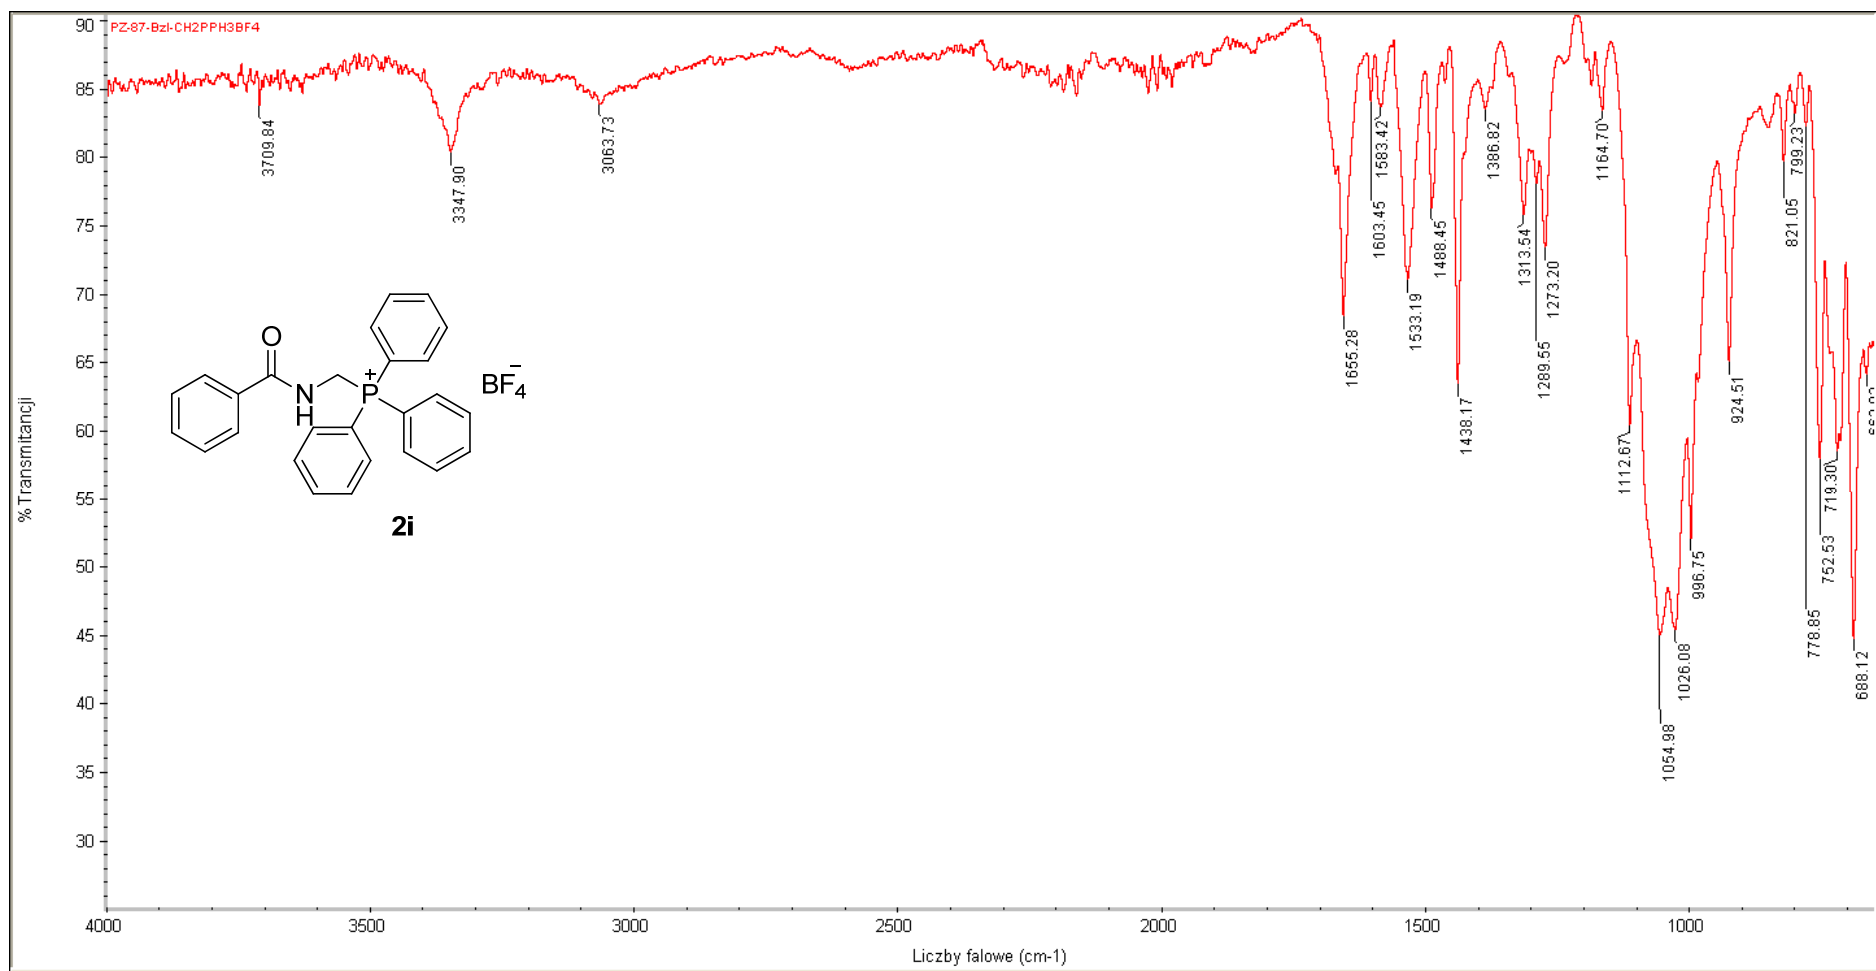

IR spectrum of (*N*-benzoylamino)methyltriphenylphosphonium tetrafluoroborate (**2i**); ATR (cm<sup>-1</sup>).

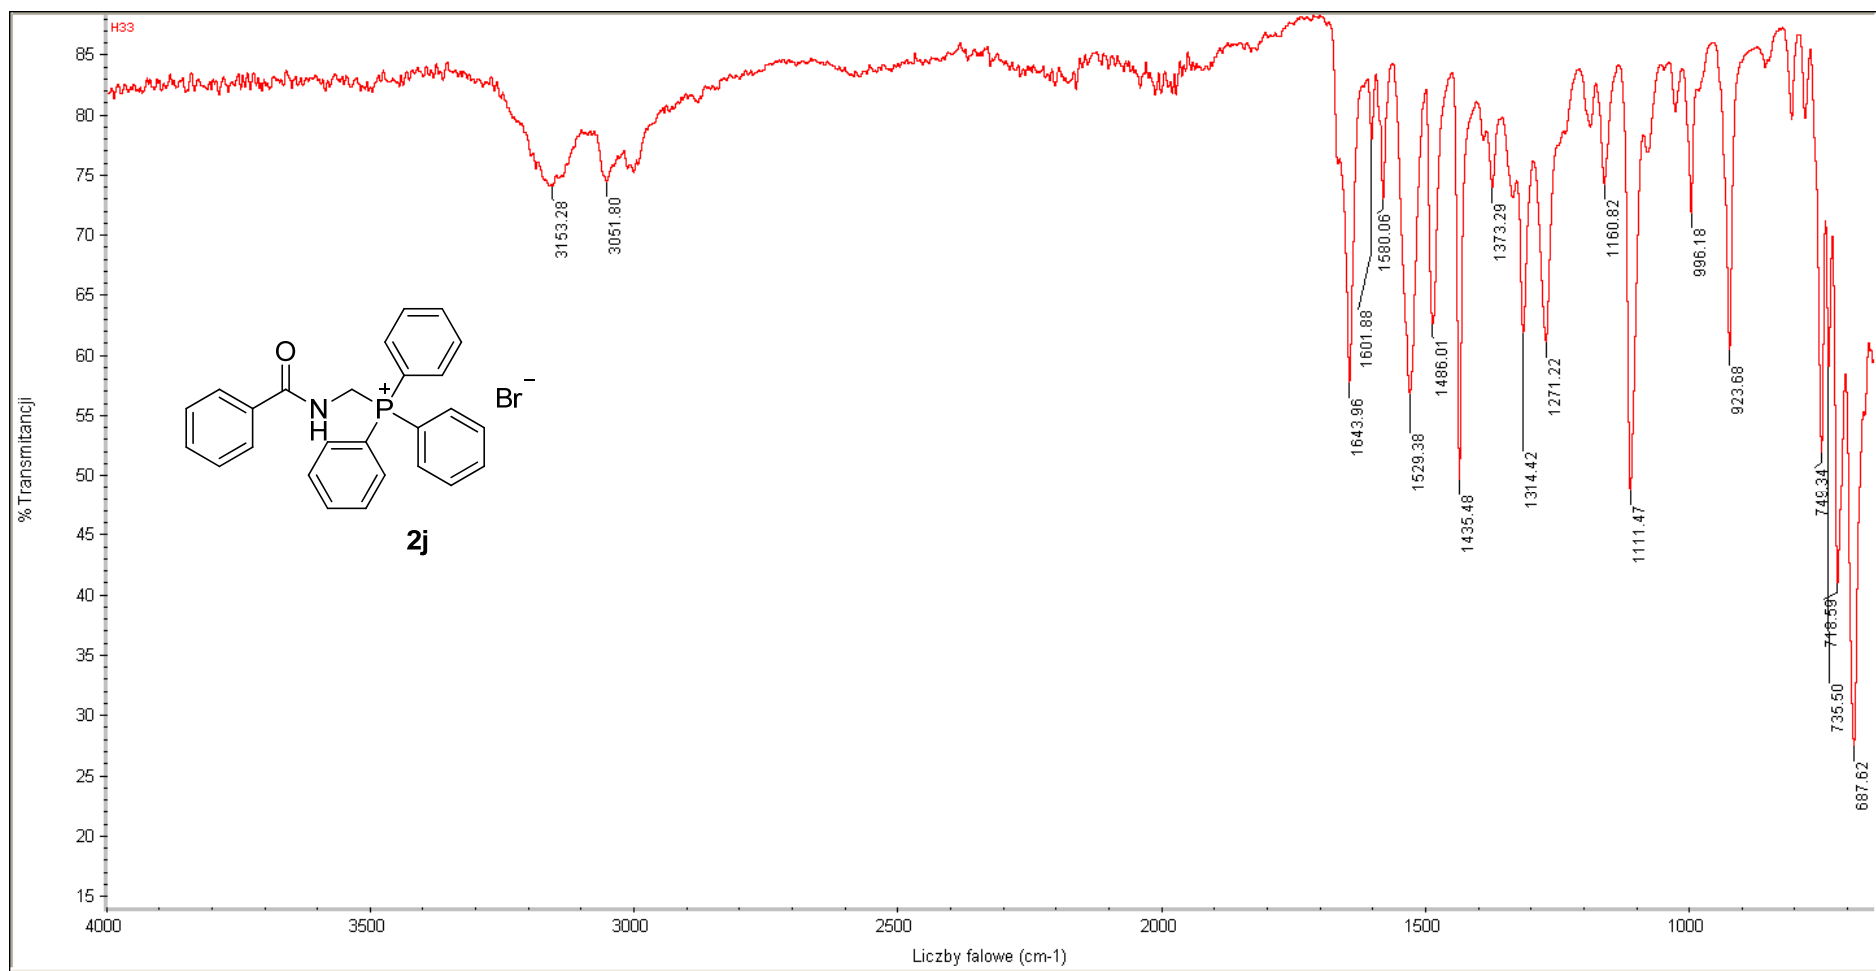

IR spectrum of (*N*-benzoylamino)methyltriphenylphosphonium bromide (**2j**); ATR (cm<sup>-1</sup>).

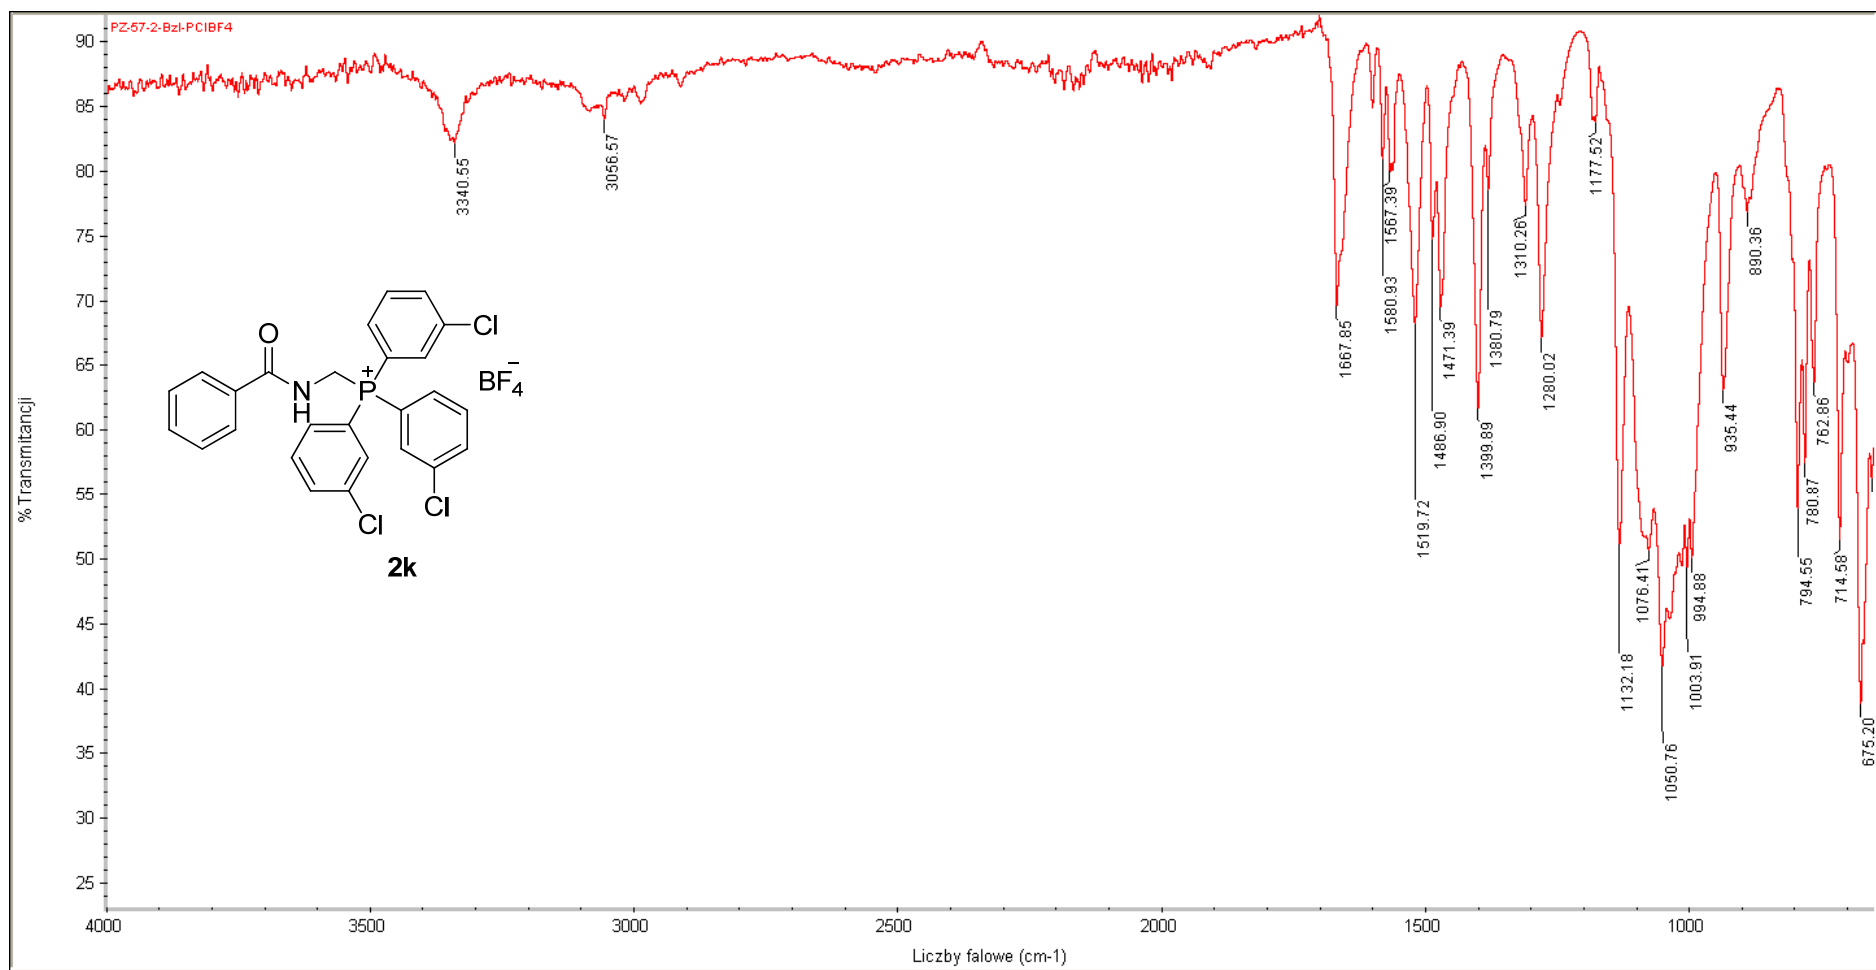

IR spectrum of (*N*-benzoylamino)methyltris(3-chlorophenyl)phosphonium tetrafluoroborate (**2k**); ATR (cm<sup>-1</sup>).

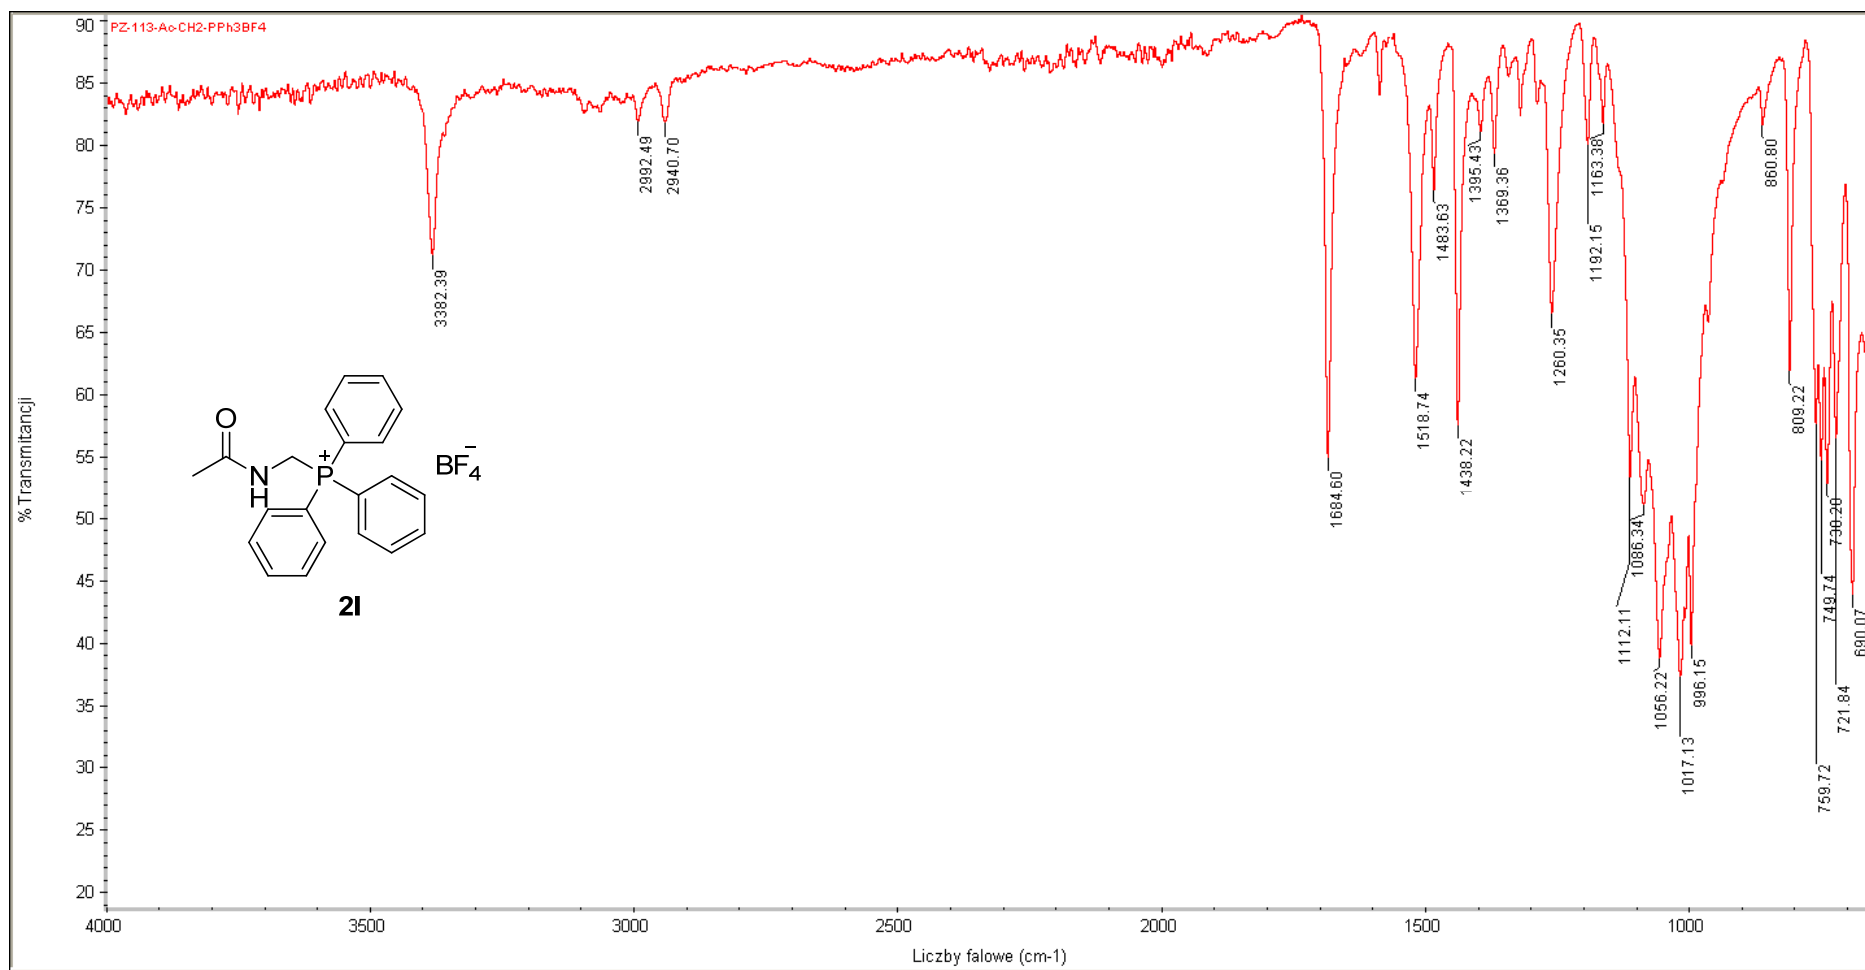

IR spectrum of (*N*-acetylamino)methyltriphenylphosphonium tetrafluoroborate (**2I**); ATR (cm<sup>-1</sup>).

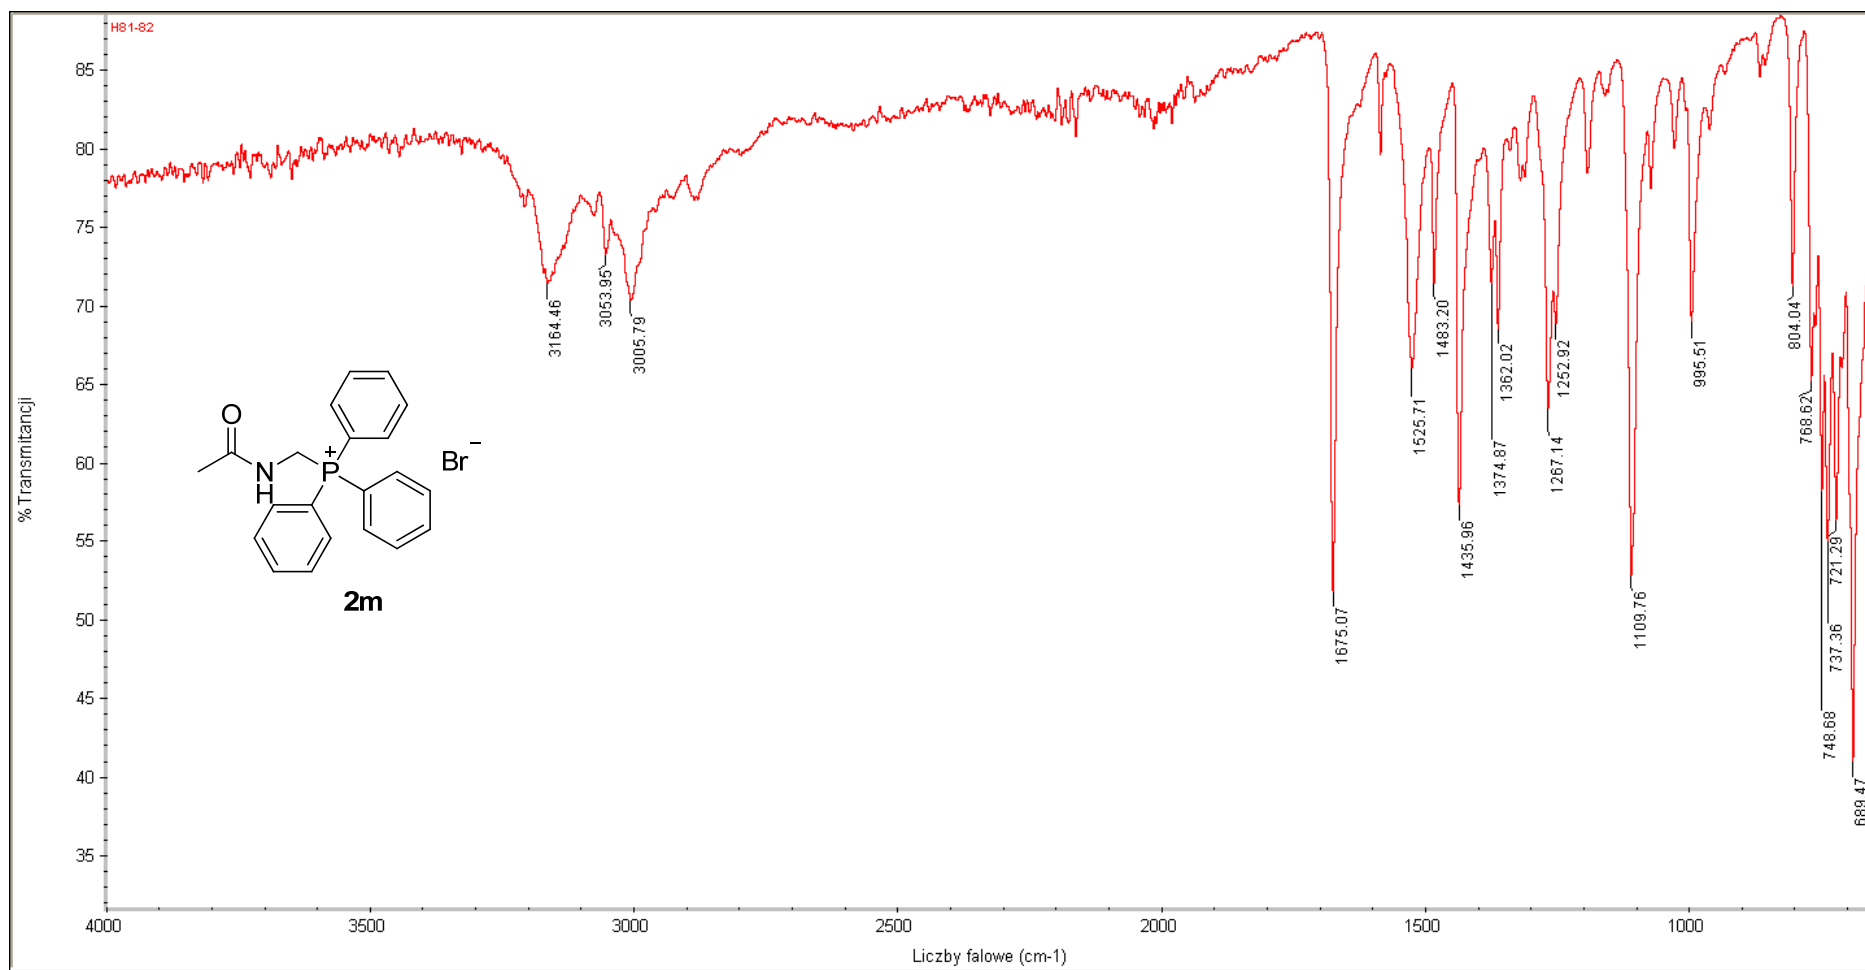

IR spectrum of (*N*-acetylamino)methyltriphenylphosphonium bromide (**2m**); ATR (cm<sup>-1</sup>).



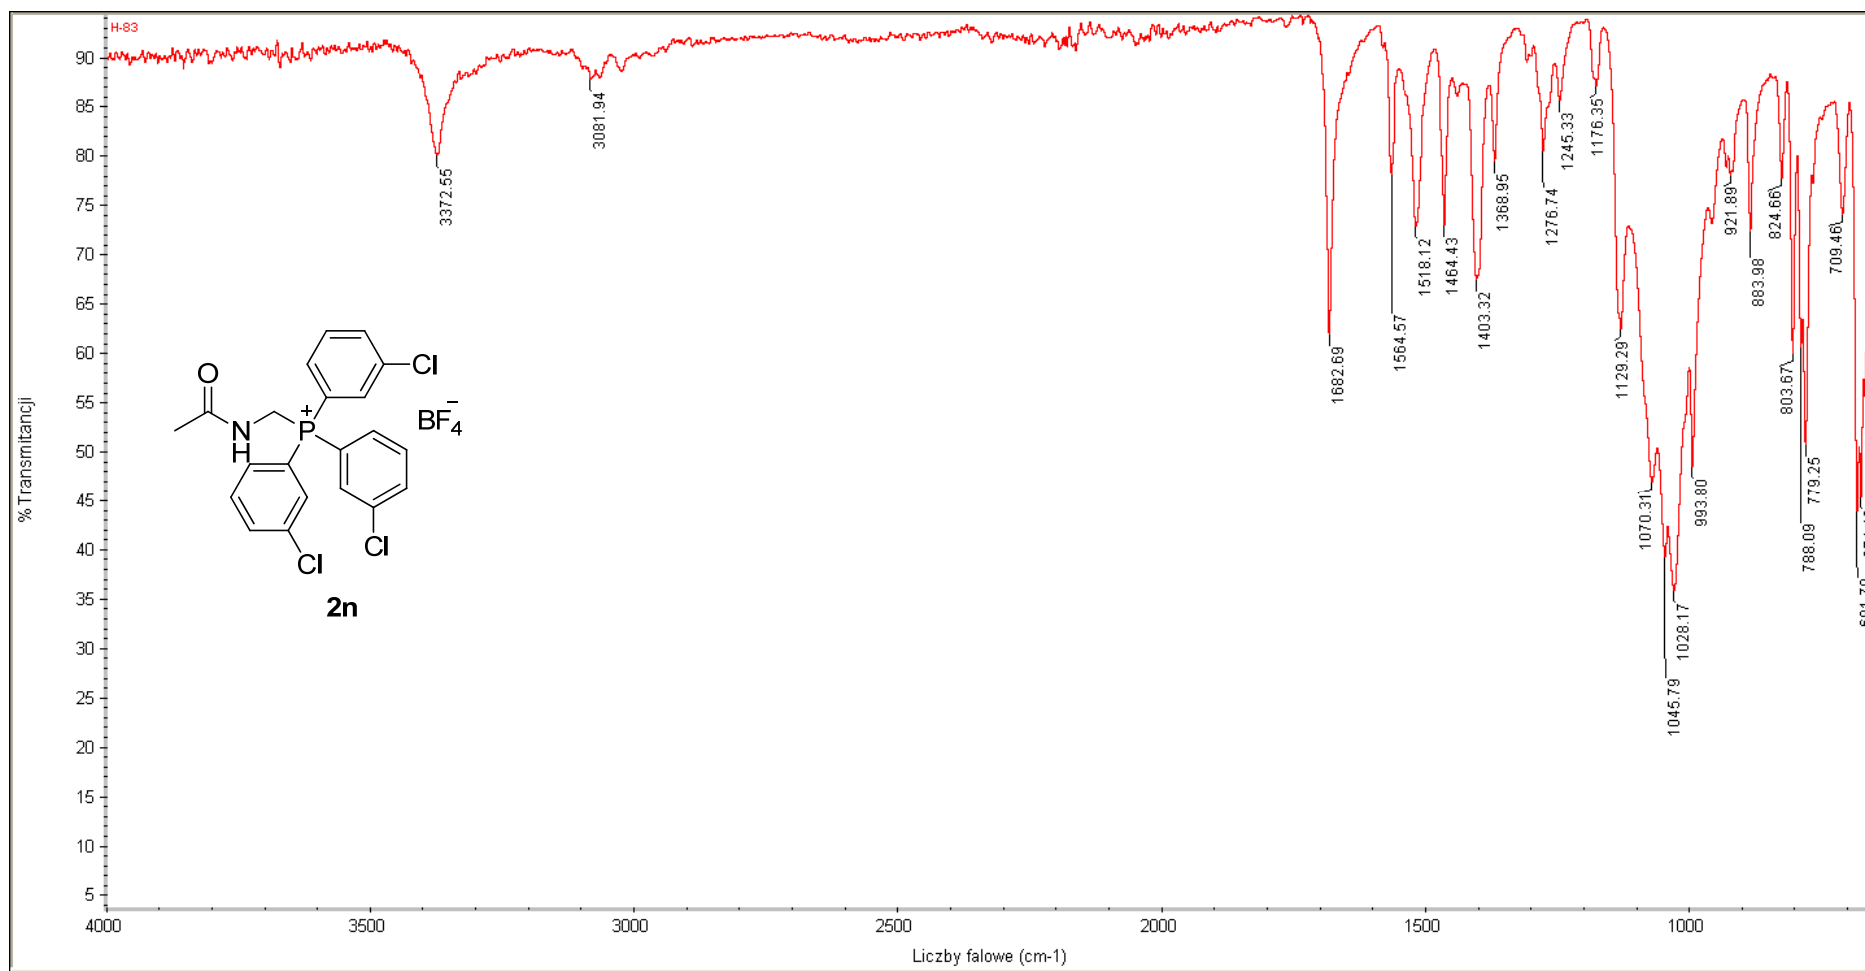

IR spectrum of (*N*-acetylamino)methyltris(3-chlorophenyl)phosphonium tetrafluoroborate (**2n**); ATR (cm<sup>-1</sup>).

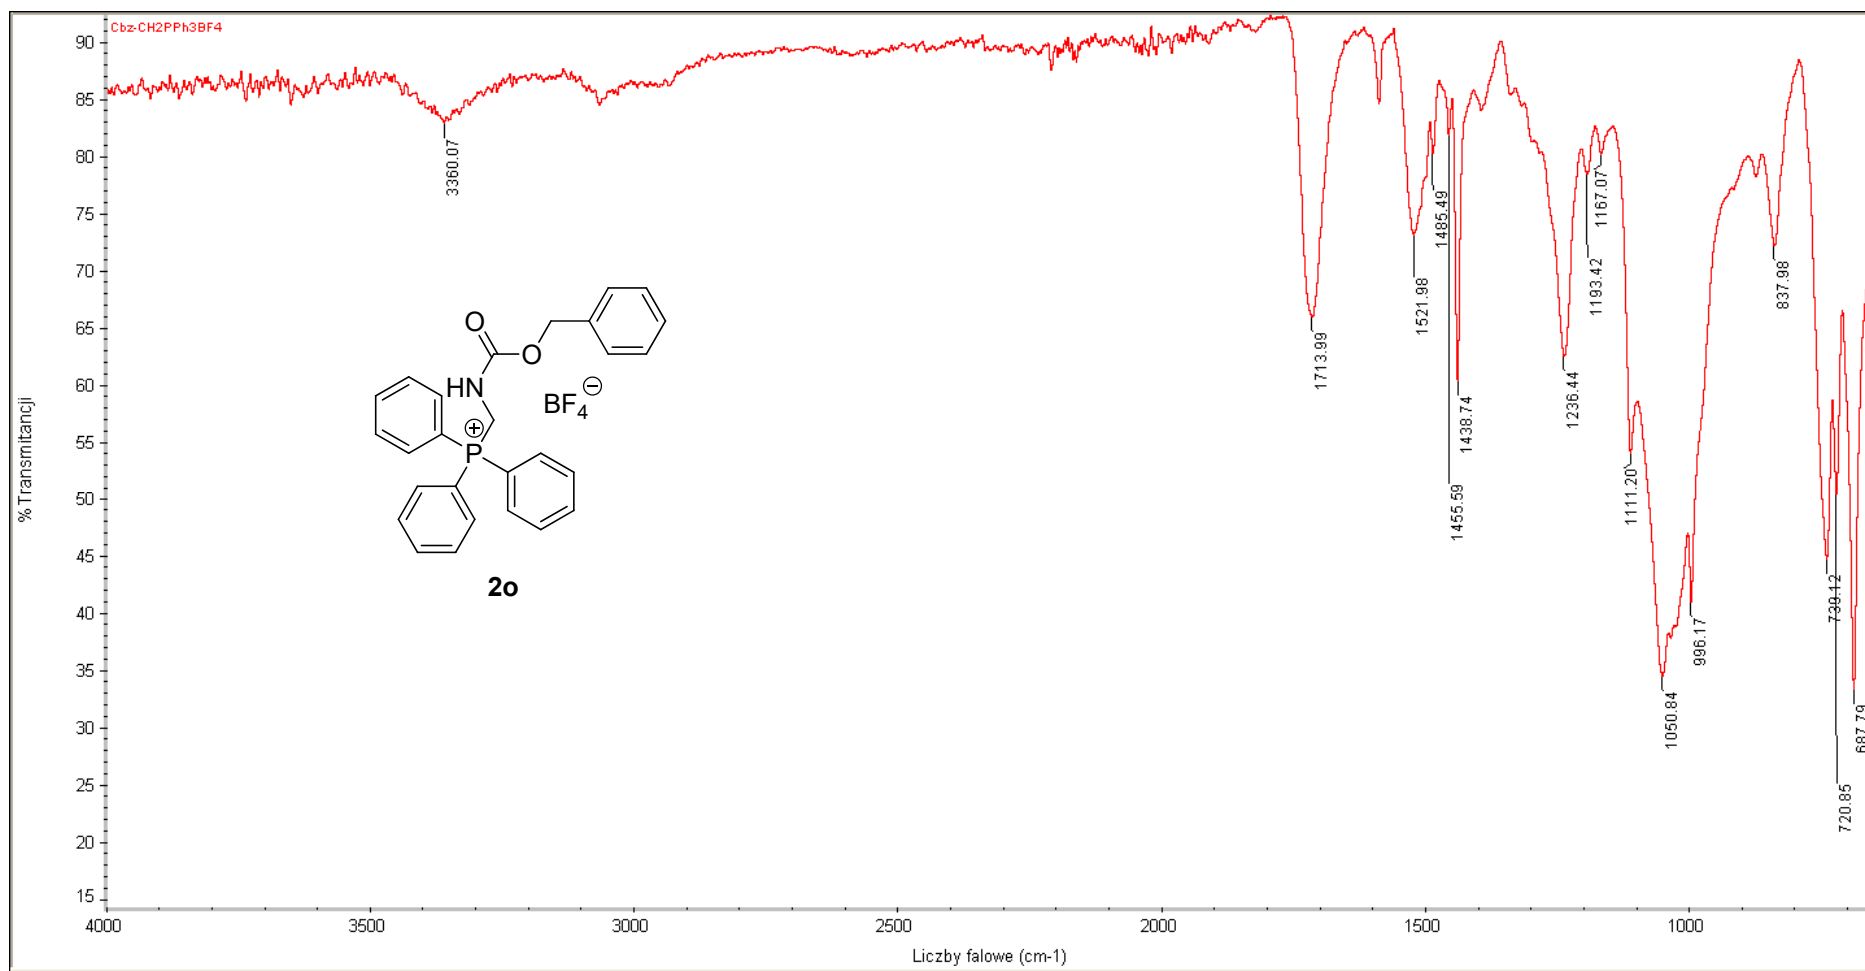

IR spectrum of (N-benzyloxycarbonylamino)methyltriphenylphosphonium tetrafluoroborate (**2o**); ATR (cm<sup>-1</sup>).

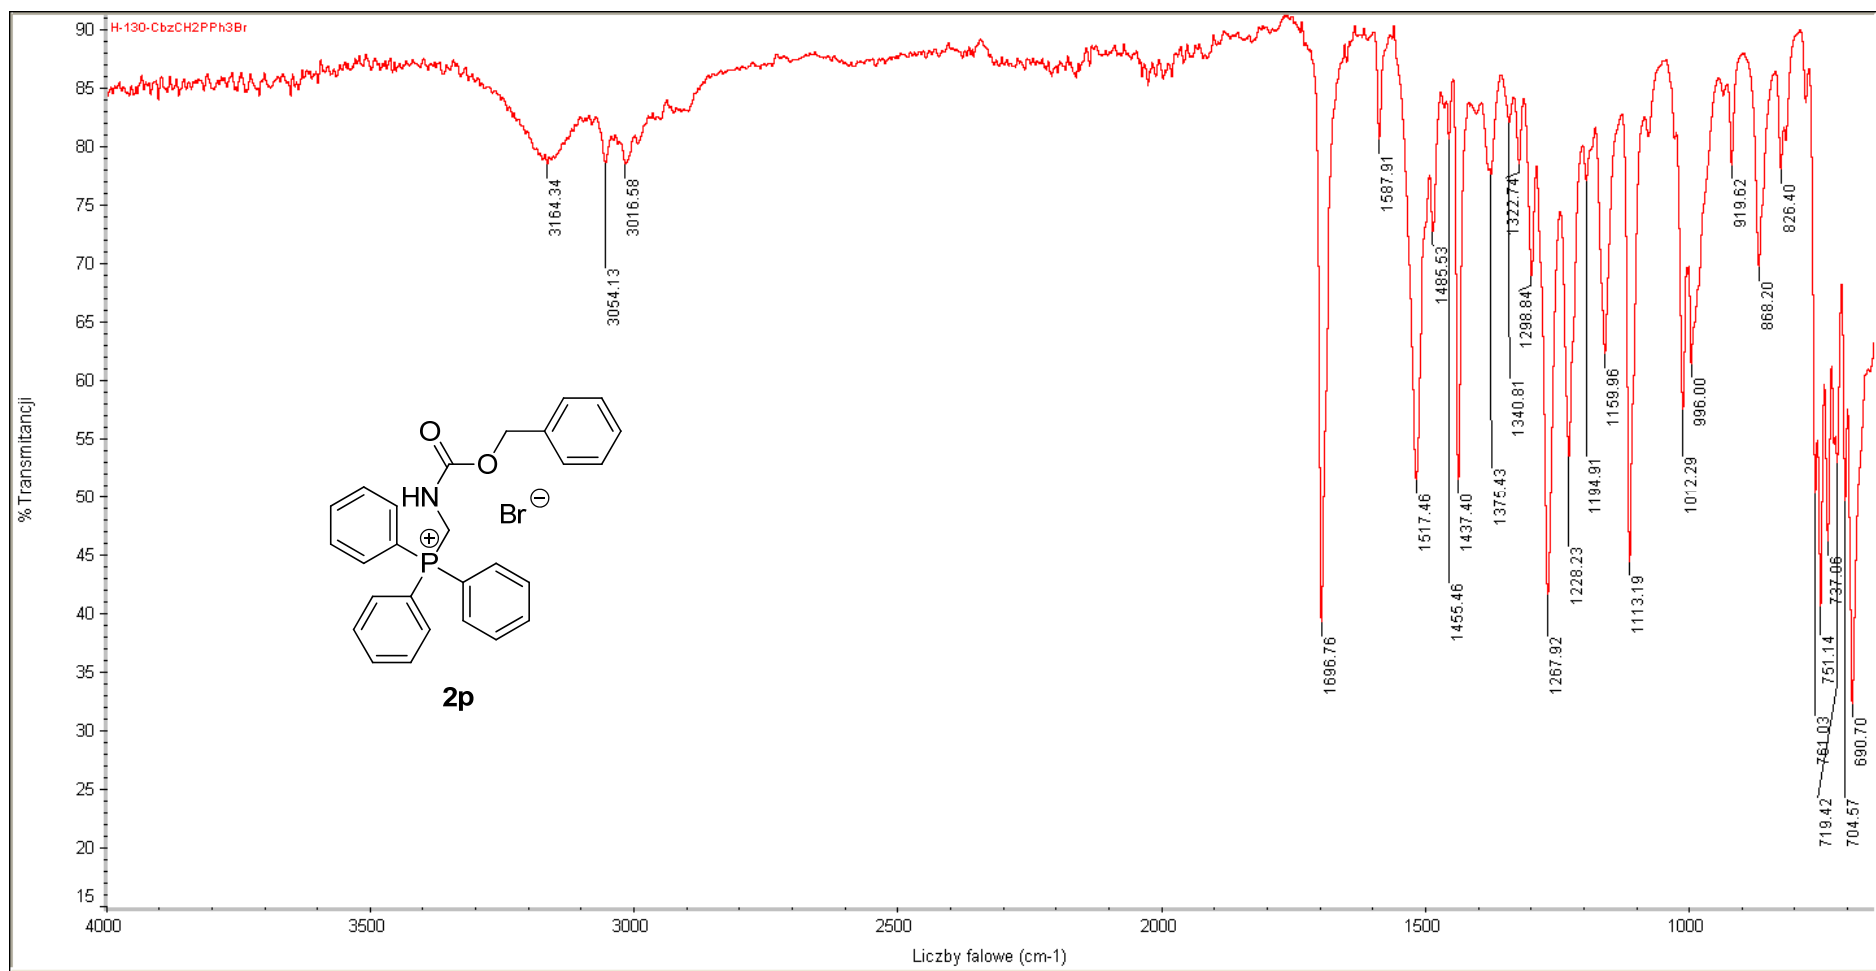

IR spectrum of (N-benzyloxycarbonylamino)methyltriphenylphosphonium bromide (**2p**); ATR (cm<sup>-1</sup>).



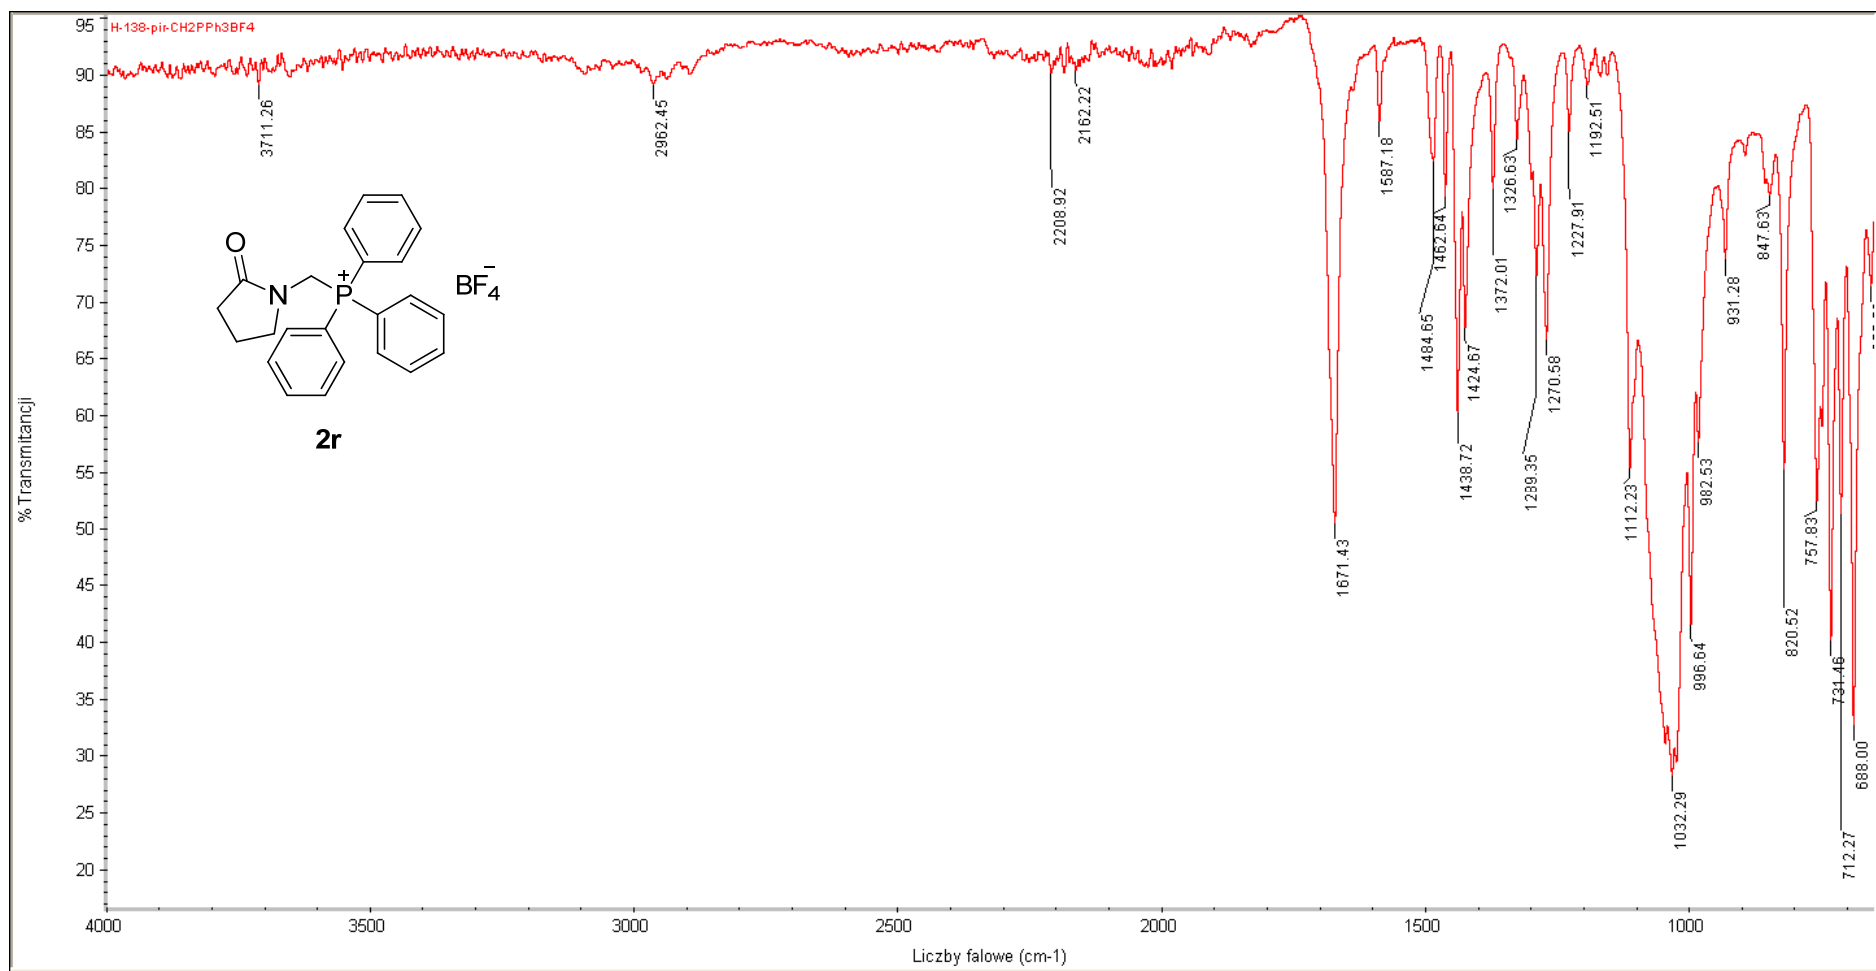

IR spectrum of 1-(2-oxopyrrolidin-1-yl)methyltriphenylphosphonium tetrafluoroborate (**2r**); ATR ( $\text{cm}^{-1}$ ).

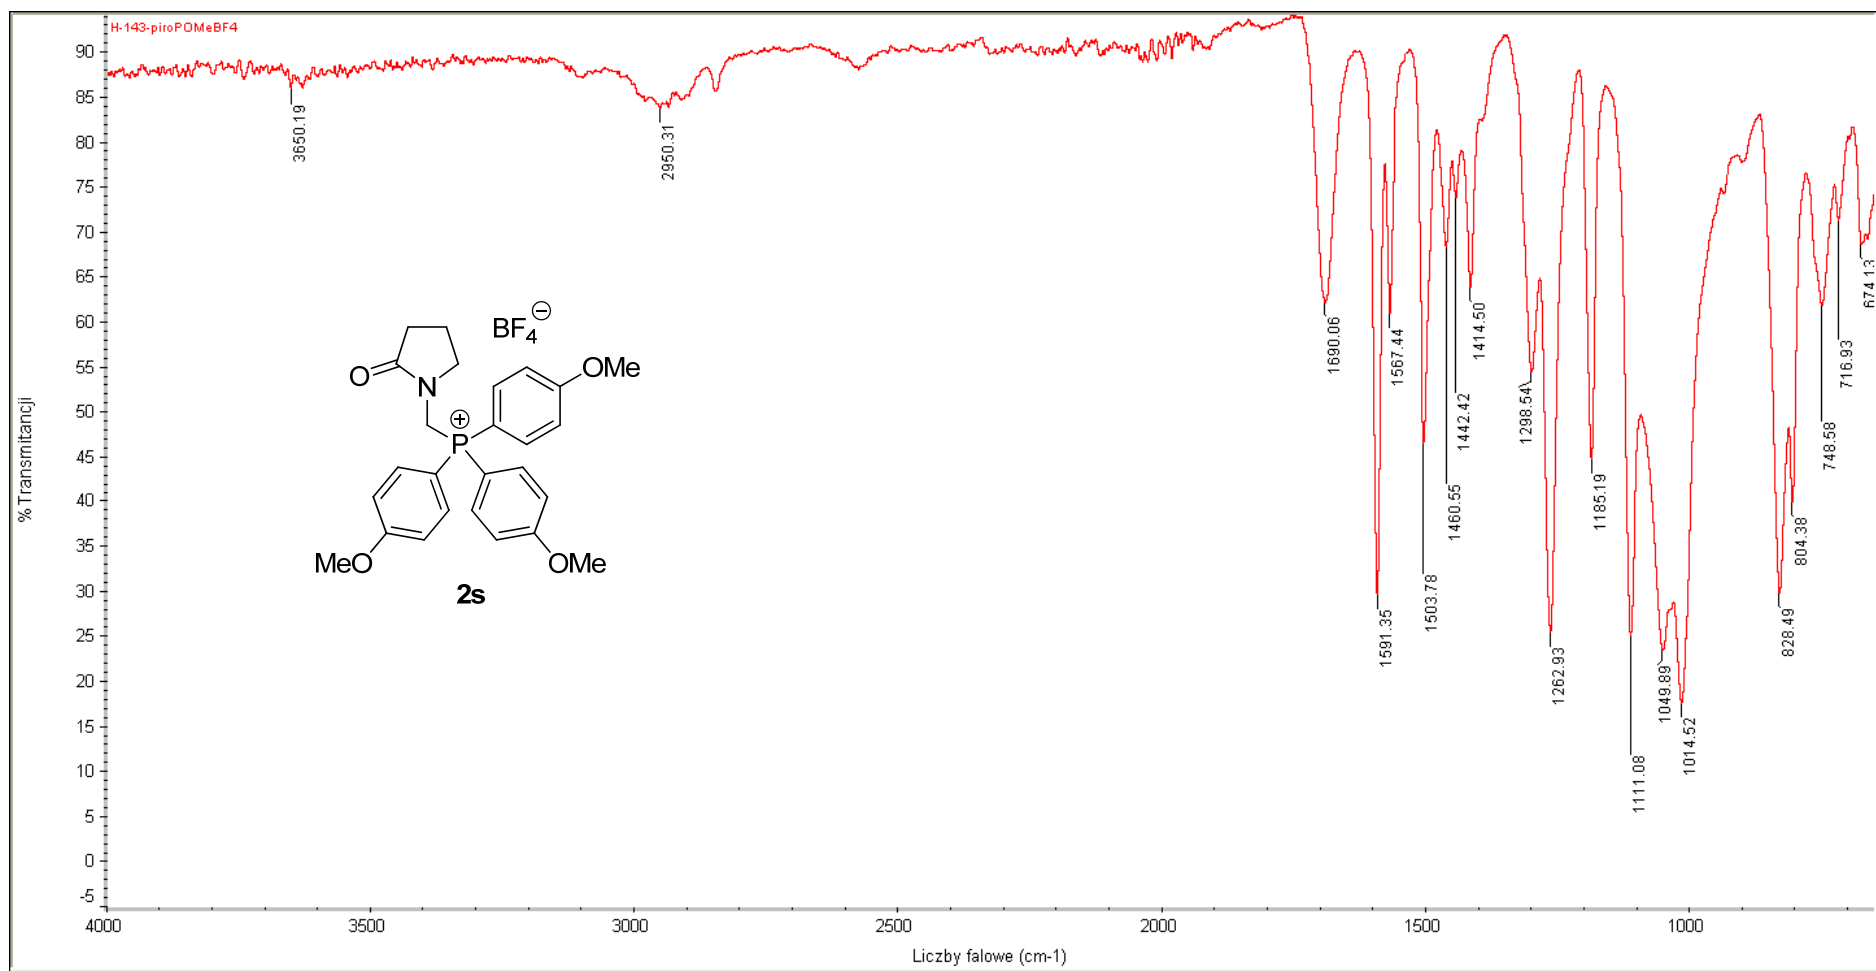

IR spectrum of (2-oxopyrrolidin-1-yl)methyltris(4-methoxyphenyl)phosphonium tetrafluoroborate (**2s**); ATR (cm⁻¹).

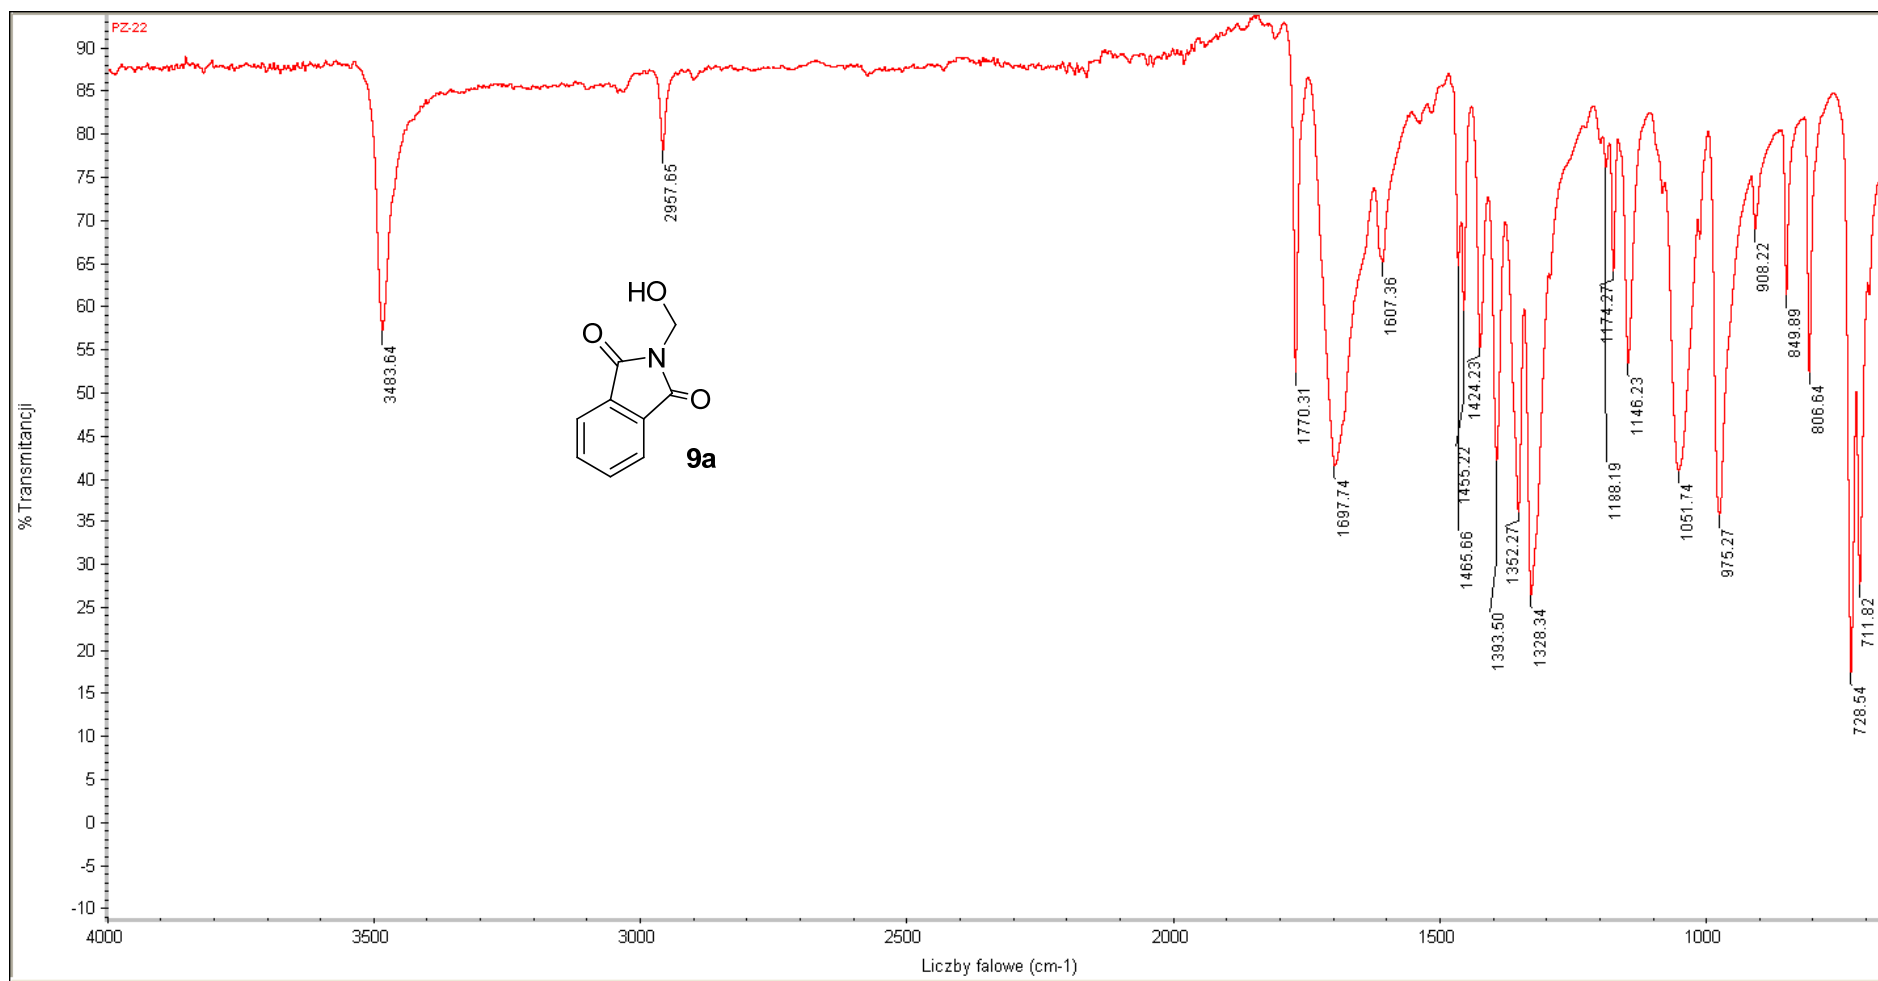

IR spectrum of *N*-hydroxymethylphthalimide (**9a**); ATR (cm<sup>-1</sup>).

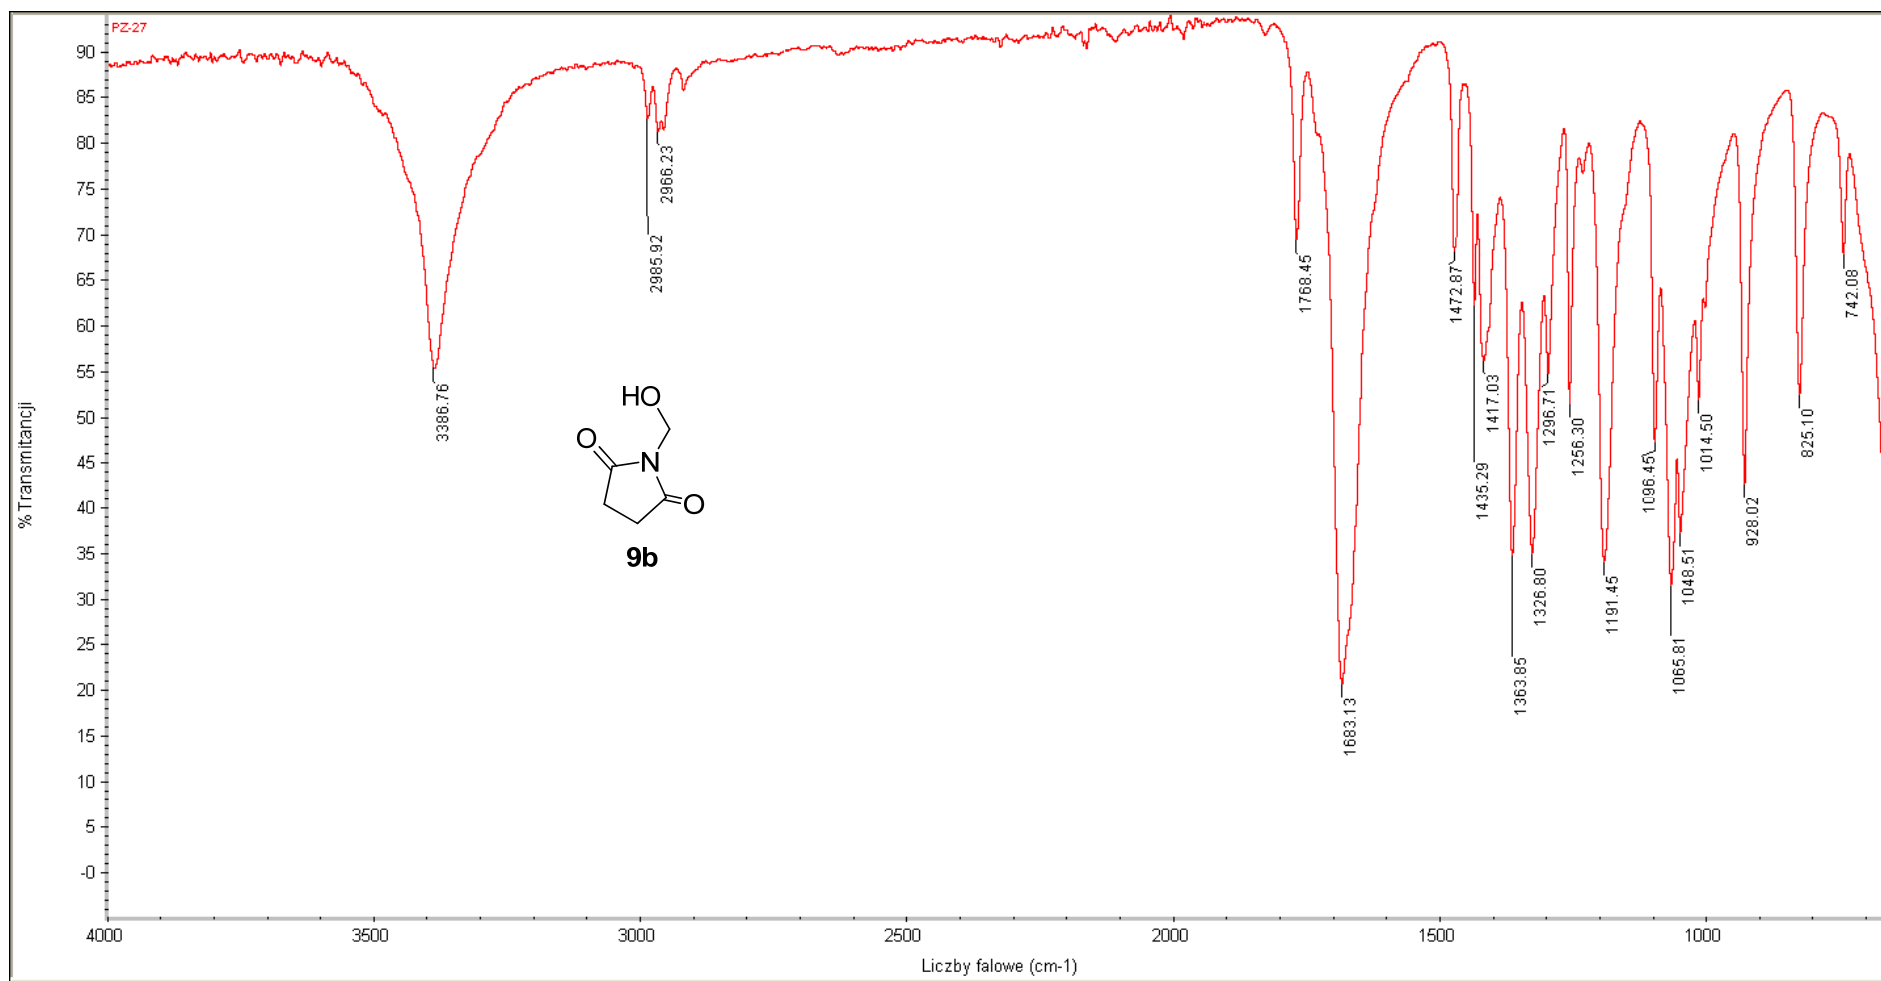

IR spectrum of *N*-hydroxymethylsuccinimide (**9b**); ATR (cm<sup>-1</sup>).



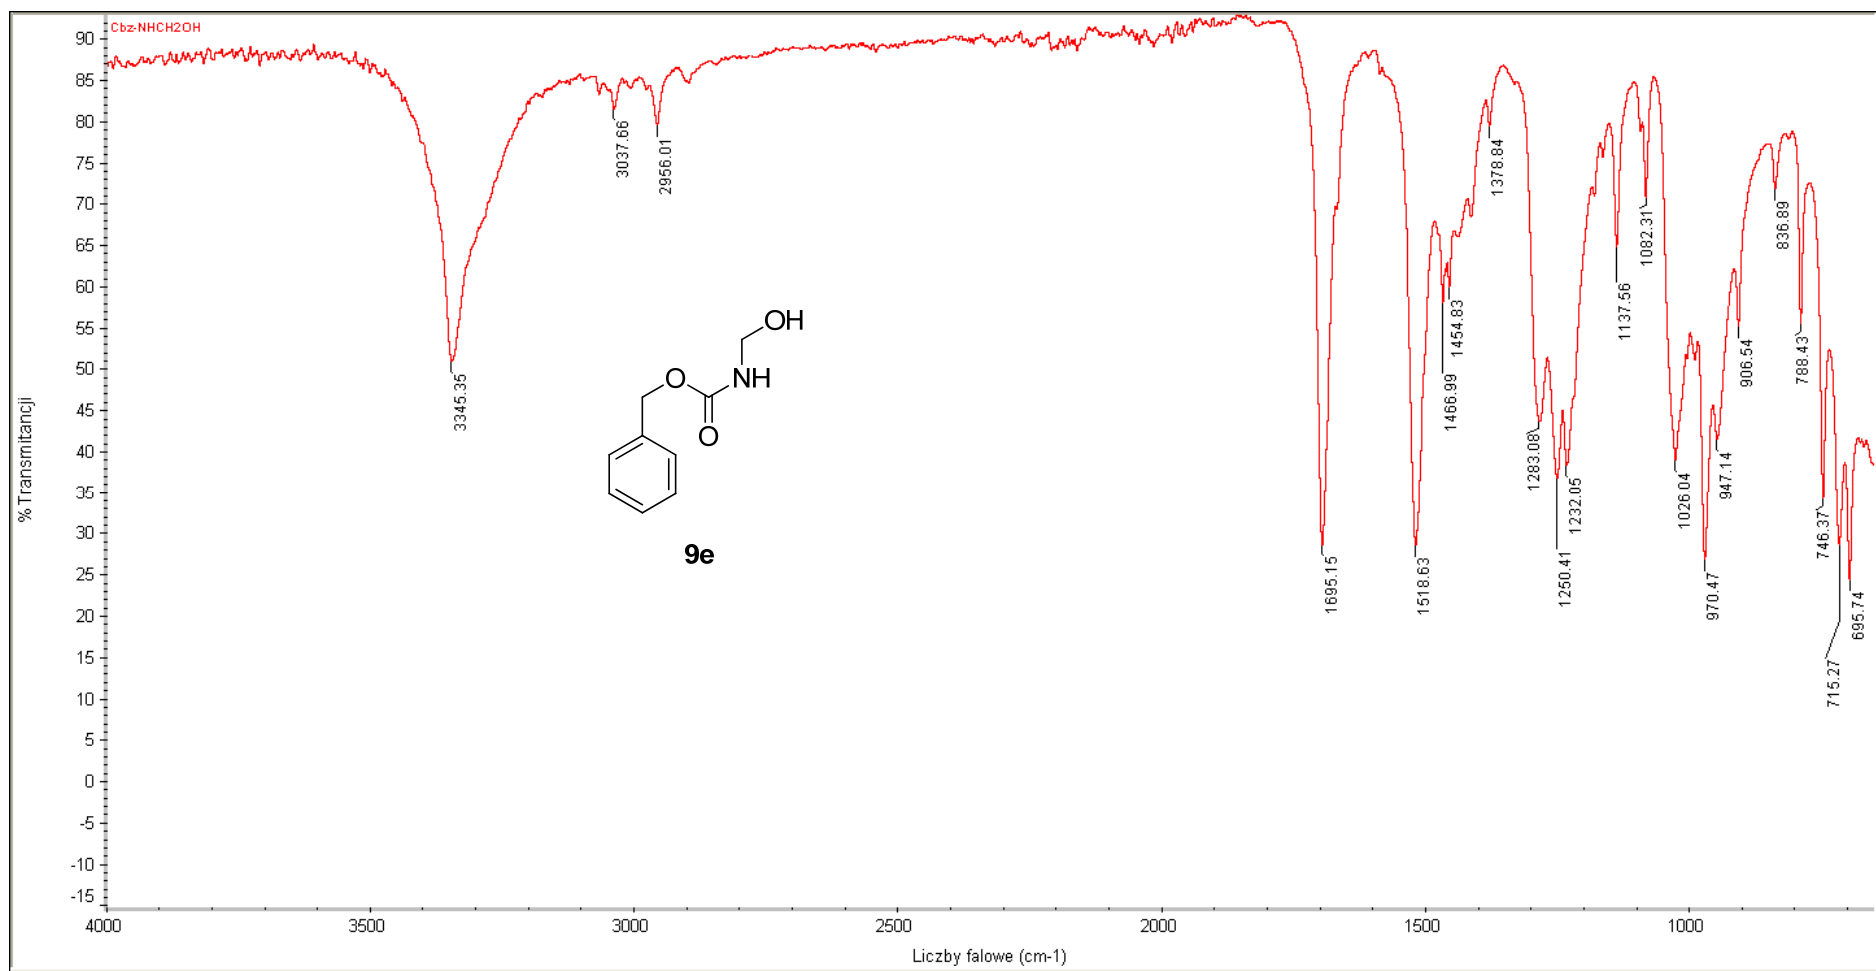

IR spectrum of benzyl *N*-hydroxymethylcarbamate (**9e**); ATR (cm<sup>-1</sup>).

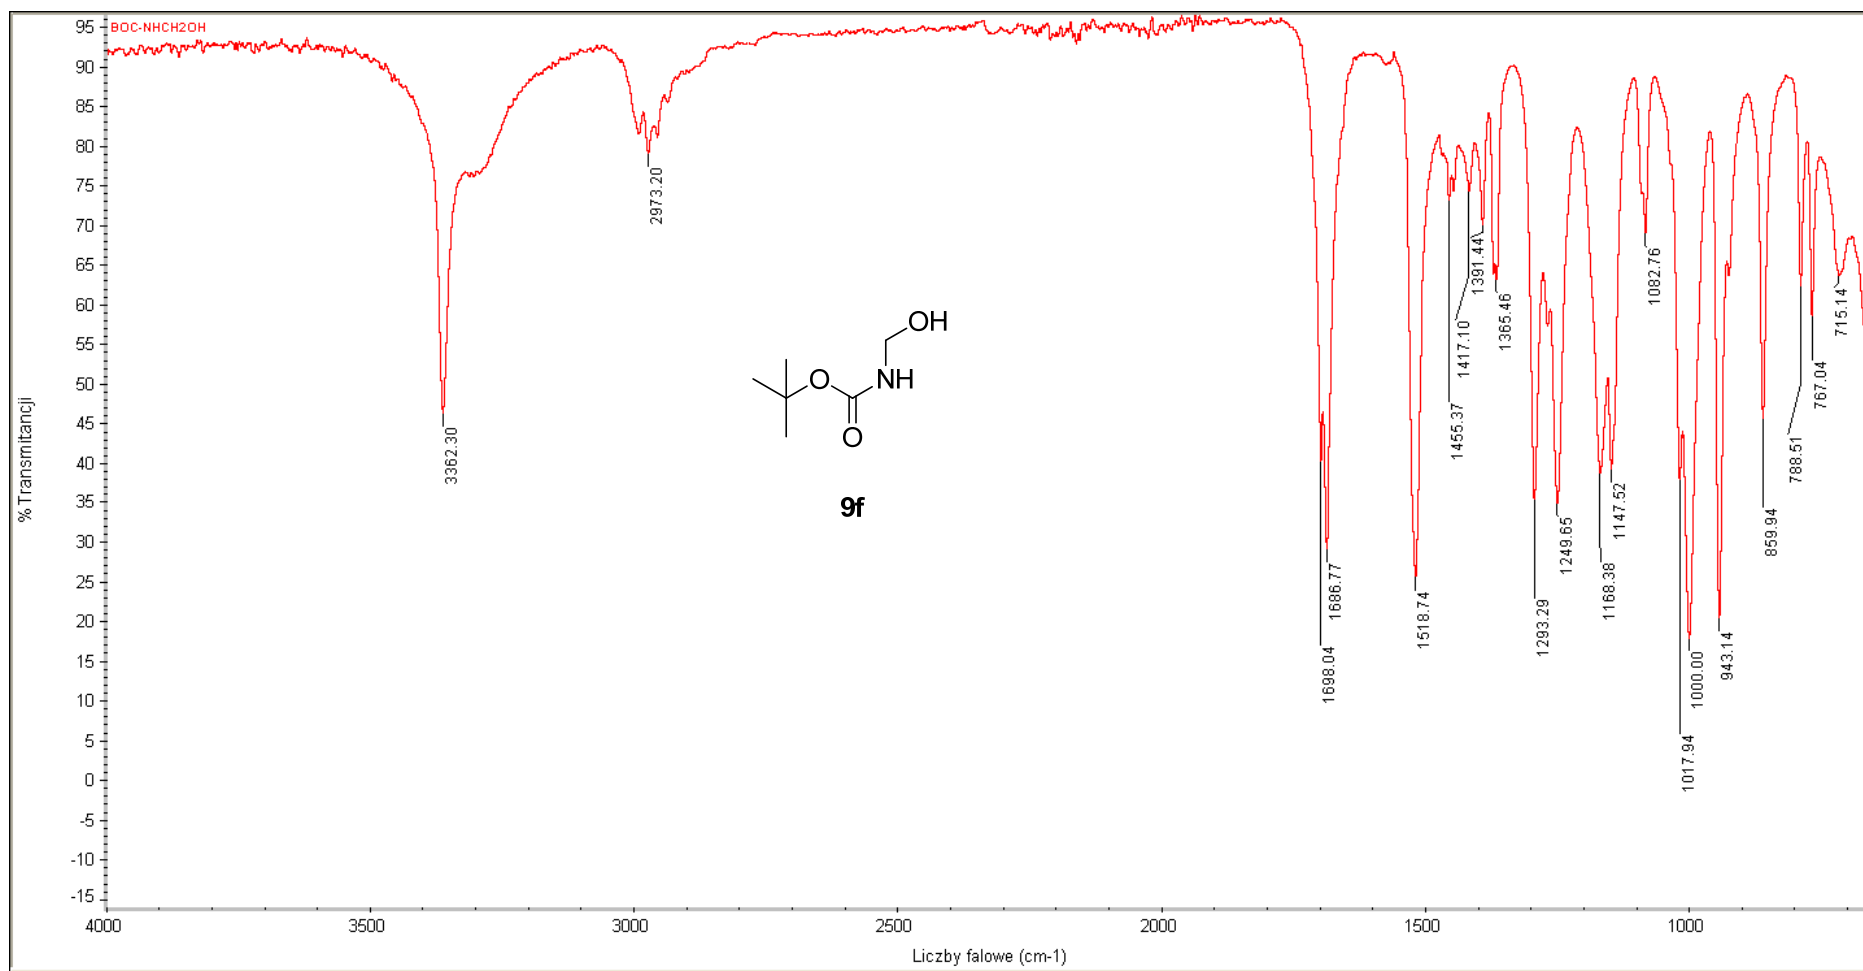

IR spectrum of *tert*-butyl *N*-hydroxymethylcarbamate (**9f**); ATR (cm<sup>-1</sup>).

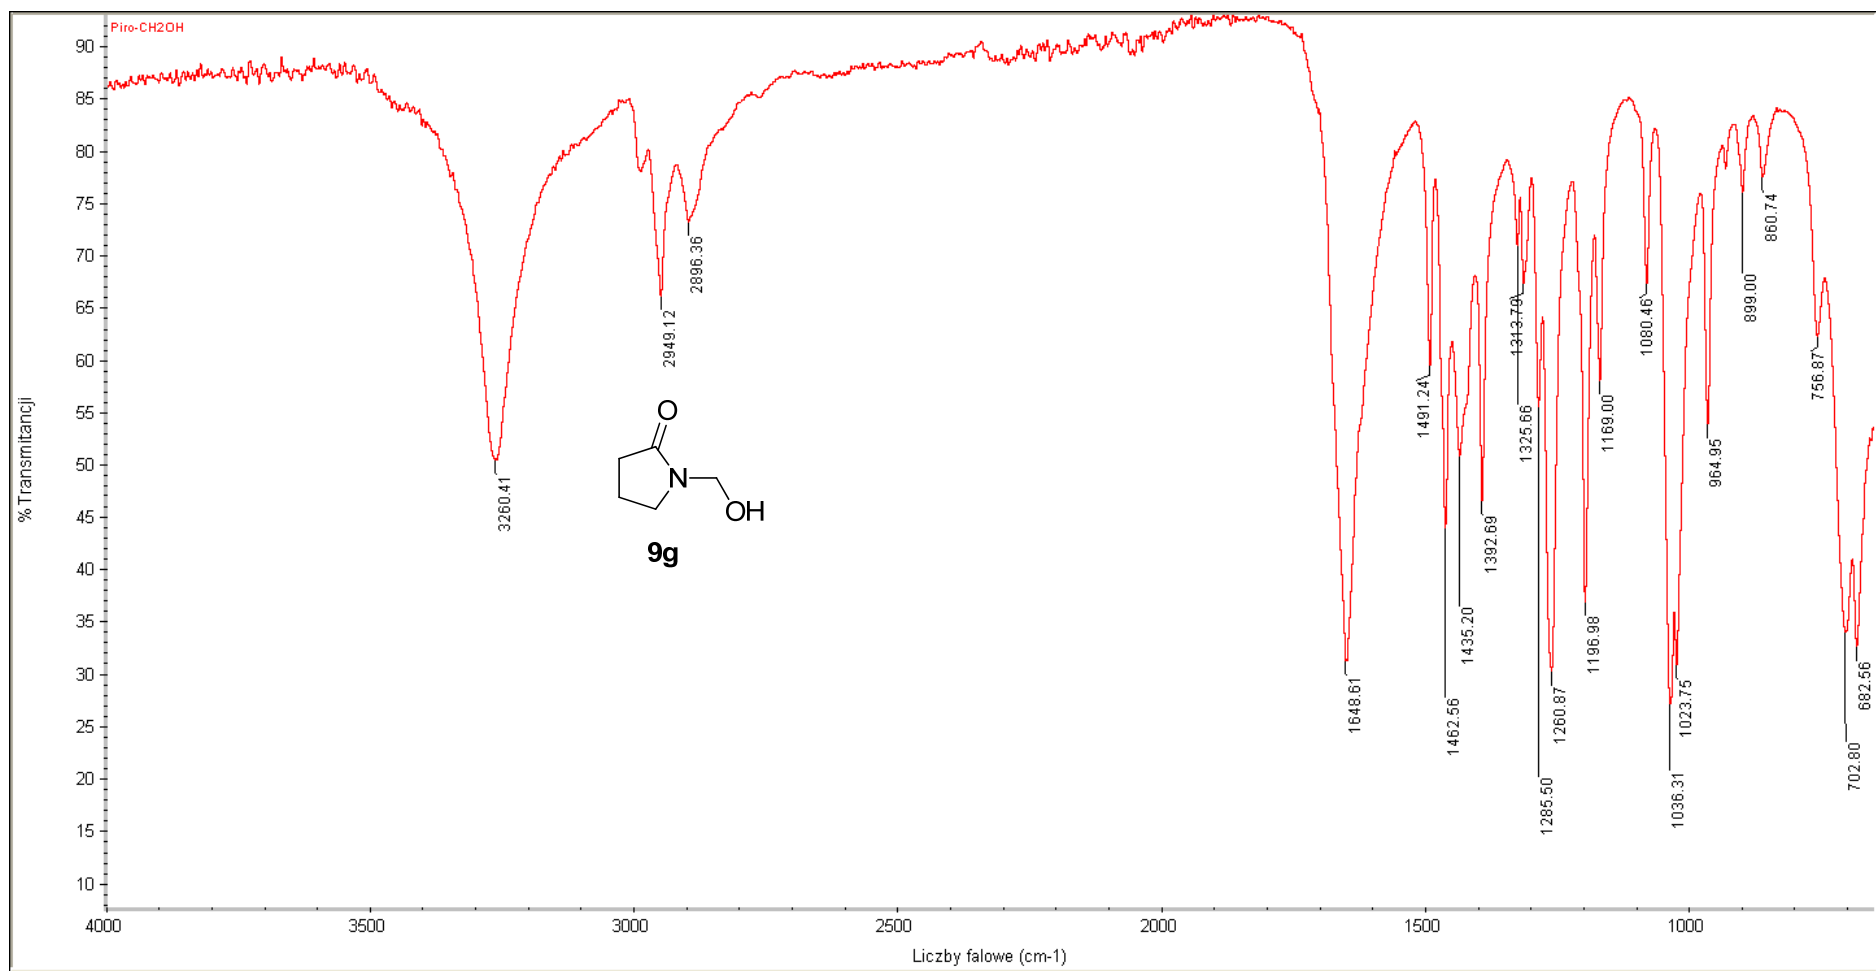

IR spectrum of *N*-hydroxymethyl-2-pyrrolidone (**9g**); ATR (cm<sup>-1</sup>).

Tolerance = 50.0 mDa / DBE: min = -10.0, max = 50.0

Element prediction: Off

Number of isotope peaks used for i-FIT = 2

Monoisotopic Mass, Even Electron Ions

2477 formula(e) evaluated with 203 results within limits (up to 3 closest results for each mass)

Elements Used:

| Mass     | RA     | Calc. Mass | mDa  | PPM  | DBE  | Formula            | i-FIT | i-FIT Norm | Fit Conf % | C  | H  | N | O | Na | P | S | Cl |
|----------|--------|------------|------|------|------|--------------------|-------|------------|------------|----|----|---|---|----|---|---|----|
| 422.1310 | 100.00 | 422.1310   | 0.0  | 0.0  | 18.5 | C27 H21 N O2 P     | 550.7 | 0.336      | 71.43      | 27 | 21 | 1 | 2 |    | 1 |   |    |
|          |        | 422.1312   | -0.2 | -0.5 | 18.5 | C28 H21 N O Cl     | 551.7 | 1.333      | 26.36      | 28 | 21 | 1 | 1 |    |   |   | 1  |
|          |        | 422.1314   | -0.4 | -0.9 | 1.5  | C18 H33 N Na P Cl3 | 554.2 | 3.813      | 2.21       | 18 | 33 | 1 |   | 1  | 1 |   | 3  |

P226 174 (0.408) Cm (164:182)

1: TOF MS ES+

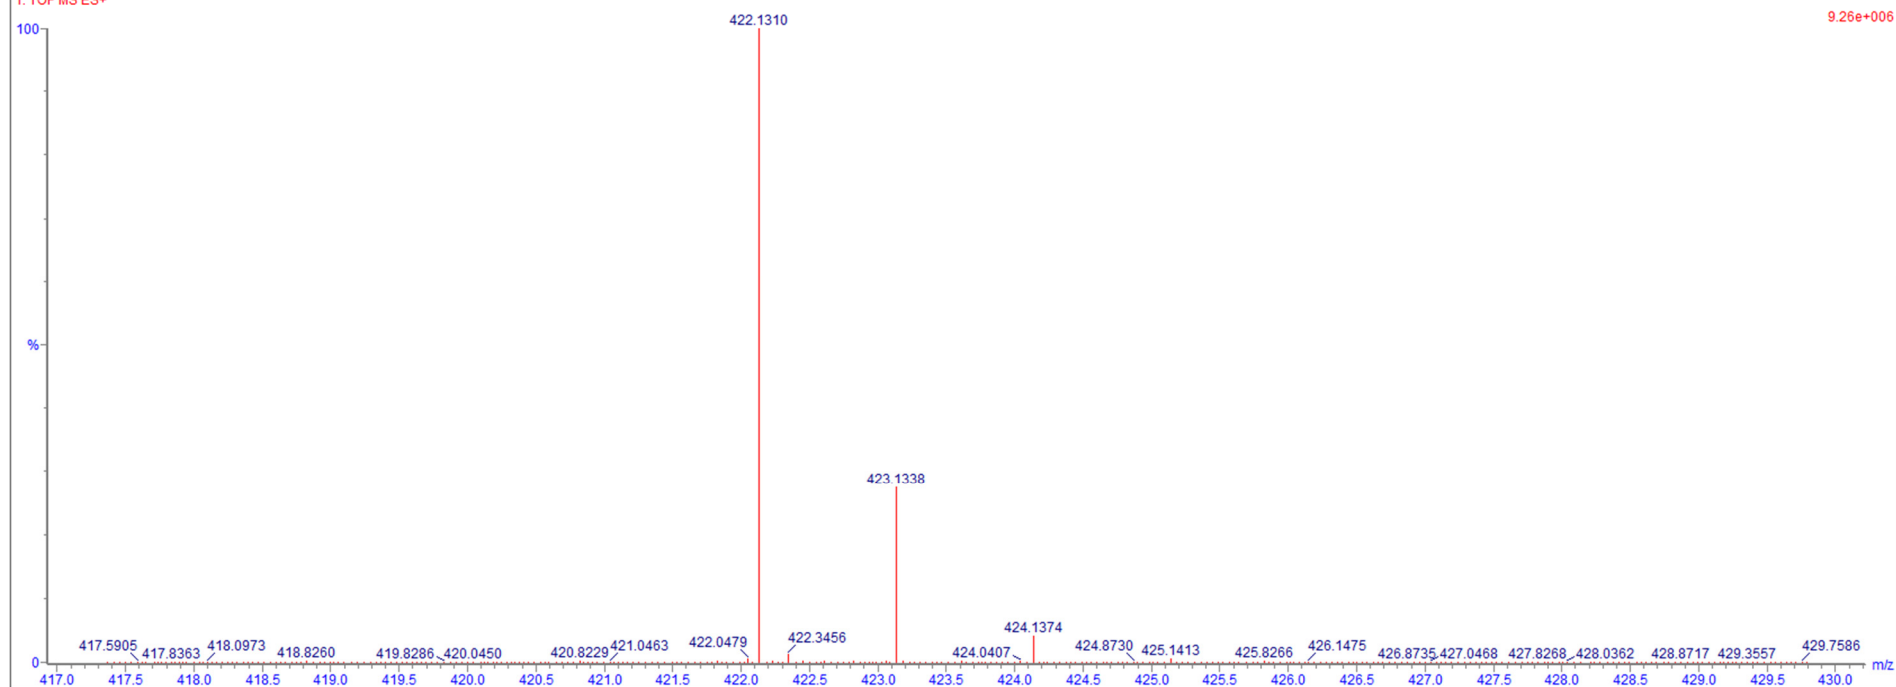

MS spectrum of 1-(*N*-phthalimido)methyltriphenylphosphonium bromide (**2c**).

**Multiple Mass Analysis: 2 mass(es) processed**

Tolerance = 100.0 mDa / DBE: min = -10.0, max = 50.0

Element prediction: Off

Number of isotope peaks used for i-FIT = 2

Monoisotopic Mass, Even Electron Ions

36 formula(e) evaluated with 13 results within limits (up to 5 closest results for each mass)

Elements Used:

| Mass     | RA     | Calc. Mass | mDa   | PPM    | DBE  | Formula            | i-FIT | i-FIT Norm | Fit Conf % | C  | H  | N | O | P | Cl |
|----------|--------|------------|-------|--------|------|--------------------|-------|------------|------------|----|----|---|---|---|----|
| 524.0140 | 100.00 | 524.0141   | -0.1  | -0.2   | 18.5 | C27 H18 N O2 P Cl3 | 454.0 | 2.480      | 8.38       | 27 | 18 | 1 | 2 | 1 | 3  |
|          |        | 523.9777   | 36.3  | 69.3   | 19.5 | C26 H14 N O3 P Cl3 | 453.2 | 1.655      | 19.11      | 26 | 14 | 1 | 3 | 1 | 3  |
|          |        | 524.0505   | -36.5 | -69.7  | 17.5 | C28 H22 N O P Cl3  | 455.6 | 4.030      | 1.78       | 28 | 22 | 1 | 1 | 1 | 3  |
|          |        | 523.9566   | 57.4  | 109.5  | 24.5 | C29 H10 N O P Cl3  | 456.8 | 5.263      | 0.52       | 29 | 10 | 1 | 1 | 1 | 3  |
|          |        | 524.0716   | -57.6 | -109.9 | 12.5 | C25 H26 N O3 P Cl3 | 451.9 | 0.354      | 70.21      | 25 | 26 | 1 | 3 | 1 | 3  |
| 526.0115 | 98.94  | 525.9933   | 18.2  | 34.6   | 18.5 | C26 H16 N O3 P Cl3 | 479.5 | 1.120      | 32.63      | 26 | 16 | 1 | 3 | 1 | 3  |
|          |        | 526.0297   | -18.2 | -34.6  | 17.5 | C27 H20 N O2 P Cl3 | 480.9 | 2.530      | 7.97       | 27 | 20 | 1 | 2 | 1 | 3  |
|          |        | 525.0772   | 20.2  | 74.7   | 22.5 | C29 H12 N O2 P Cl3 | 482.0 | 1.601      | 6.02       | 29 | 12 | 1 | 1 | 1 | 3  |
|          |        |            |       |        |      |                    |       |            |            |    |    |   |   |   |    |

PZ-44 259 (0.589) Cm (244:262)

1: TOF MS ES+

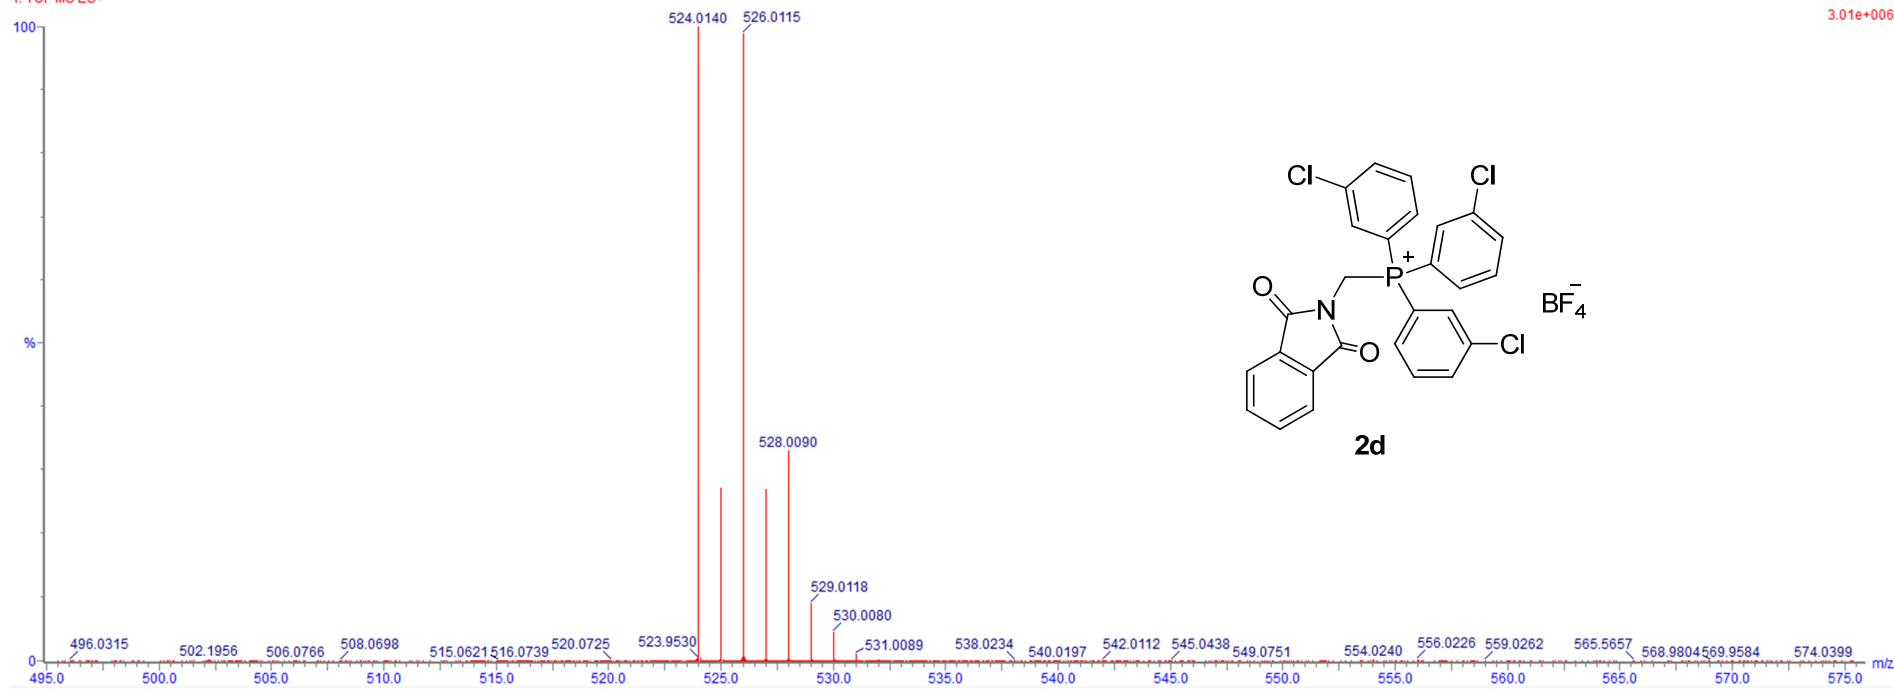

MS spectrum of 1-(*N*-phthalimido)methyltris(3-chlorophenyl)phosphonium tetrafluoroborate (**2d**).

Tolerance = 100.0 mDa / DBE: min = -10.0, max = 50.0

Element prediction: Off

Number of isotope peaks used for i-FIT = 2

Monoisotopic Mass, Even Electron Ions

27 formula(e) evaluated with 10 results within limits (up to 5 closest results for each mass)

Elements Used:

| Mass     | RA     | Calc. Mass | mDa   | PPM    | DBE  | Formula        | i-FIT | i-FIT Norm | Fit Conf % | C  | H  | N | O | P |
|----------|--------|------------|-------|--------|------|----------------|-------|------------|------------|----|----|---|---|---|
| 512.1627 | 100.00 | 512.1627   | 0.0   | 0.0    | 18.5 | C30 H27 N O5 P | 544.7 | 0.387      | 67.90      | 30 | 27 | 1 | 5 | 1 |
|          |        | 512.1779   | -15.2 | -29.7  | 22.5 | C34 H27 N O2 P | 547.2 | 2.883      | 5.60       | 34 | 27 | 1 | 2 | 1 |
|          |        | 512.1416   | 21.1  | 41.2   | 23.5 | C33 H23 N O3 P | 546.9 | 2.583      | 7.55       | 33 | 23 | 1 | 3 | 1 |
|          |        | 512.1991   | -36.4 | -71.1  | 17.5 | C31 H31 N O4 P | 546.0 | 1.746      | 17.45      | 31 | 31 | 1 | 4 | 1 |
|          |        | 512.2143   | -51.6 | -100.7 | 21.5 | C35 H31 N O P  | 548.5 | 4.197      | 1.50       | 35 | 31 | 1 | 1 | 1 |

PZ-48 55 (0.141) Cm (55.71)

1: TOF MS ES+

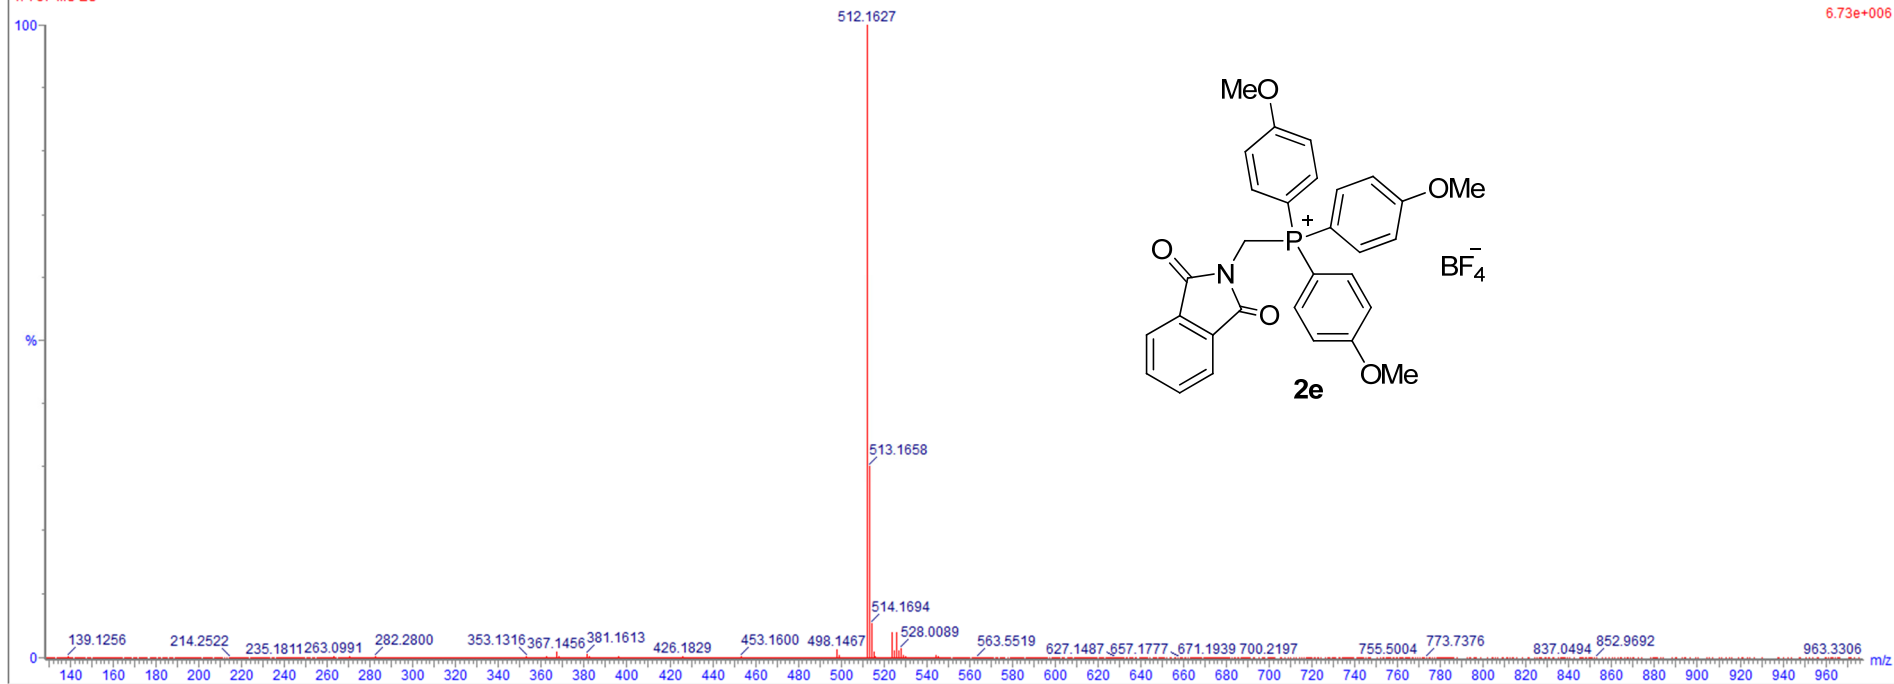

MS spectrum of 1-(*N*-phthalimido)methyltris(4-methoxyphenyl)phosphonium tetrafluoroborate (**2e**).

Tolerance = 50.0 mDa / DBE: min = -10.0, max = 50.0

Element prediction: Off

Number of isotope peaks used for i-FIT = 2

Monoisotopic Mass, Even Electron Ions

2432 formula(e) evaluated with 195 results within limits (up to 3 closest results for each mass)

Elements Used:

| Mass     | RA     | Calc. Mass | mDa  | PPM  | DBE  | Formula            | i-FIT | i-FIT Norm | Fit Conf % | C  | H  | N | O | Na | P | S | Cl |
|----------|--------|------------|------|------|------|--------------------|-------|------------|------------|----|----|---|---|----|---|---|----|
| 374.1313 | 100.00 | 374.1310   | 0.3  | 0.8  | 14.5 | C23 H21 N O2 P     | 498.0 | 0.243      | 78.40      | 23 | 21 | 1 | 2 |    | 1 |   |    |
|          |        | 374.1312   | 0.1  | 0.3  | 14.5 | C24 H21 N O Cl     | 499.3 | 1.570      | 20.80      | 24 | 21 | 1 | 1 |    |   |   | 1  |
|          |        | 374.1314   | -0.1 | -0.3 | -2.5 | C14 H33 N Na P Cl3 | 502.5 | 4.830      | 0.80       | 14 | 33 | 1 |   | 1  | 1 |   | 3  |

PZ37 260 (0.591) Cm (259.286)

1: TOF MS ES+

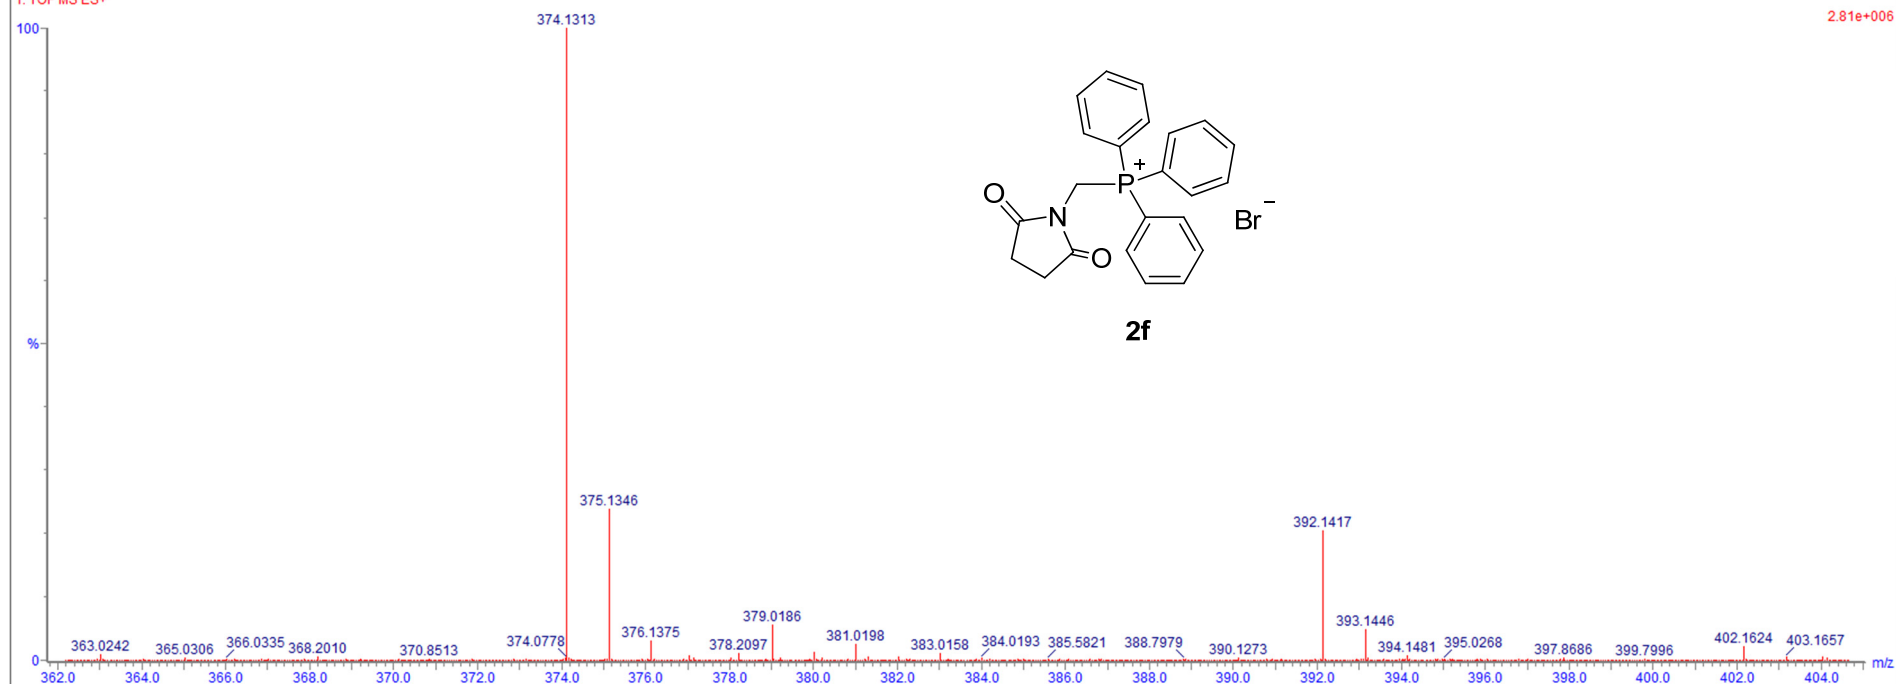

MS spectrum of 1-(N-succinimido)methyltriphenylphosphonium bromide (2f).

**Multiple Mass Analysis: 2 mass(es) processed**

Tolerance = 100.0 mDa / DBE: min = -10.0, max = 50.0

Element prediction: Off

Number of isotope peaks used for i-FIT = 2

Monoisotopic Mass, Even Electron Ions

55 formula(e) evaluated with 22 results within limits (up to 5 closest results for each mass)

Elements Used:

| Mass     | RA     | Calc. Mass | mDa   | PPM   | DBE  | Formula            | i-FIT | i-FIT Norm | Fit Conf % | C  | H  | N | O | P | Cl |
|----------|--------|------------|-------|-------|------|--------------------|-------|------------|------------|----|----|---|---|---|----|
| 476.0141 | 100.00 | 476.0141   | 0.0   | 0.0   | 14.5 | C23 H18 N O2 P Cl3 | 439.9 | 3.446      | 3.19       | 23 | 18 | 1 | 2 | 1 | 3  |
|          |        | 475.9988   | 15.3  | 32.1  | 10.5 | C19 H18 N O5 P Cl3 | 441.9 | 5.449      | 0.43       | 19 | 18 | 1 | 5 | 1 | 3  |
|          |        | 476.0352   | -21.1 | -44.3 | 9.5  | C20 H22 N O4 P Cl3 | 440.6 | 4.085      | 1.68       | 20 | 22 | 1 | 4 | 1 | 3  |
|          |        | 476.0505   | -36.4 | -76.5 | 13.5 | C24 H22 N O P Cl3  | 442.2 | 5.709      | 0.33       | 24 | 22 | 1 | 1 | 1 | 3  |
|          |        | 475.9777   | 36.4  | 76.5  | 15.5 | C22 H14 N O3 P Cl3 | 436.5 | 0.058      | 94.37      | 22 | 14 | 1 | 3 | 1 | 3  |
| 478.0114 | 98.74  | 478.0145   | -3.1  | -6.5  | 9.5  | C19 H20 N O5 P Cl3 | 472.6 | 3.807      | 2.22       | 19 | 20 | 1 | 5 | 1 | 3  |
|          |        | 477.9933   | 18.1  | 37.9  | 14.5 | C22 H16 N O3 P Cl3 | 469.0 | 0.158      | 85.40      | 22 | 16 | 1 | 3 | 1 | 3  |
|          |        | 478.0207   | -18.2 | -38.2 | 12.5 | C23 H20 N O2 P Cl3 | 471.8 | 2.052      | 5.22       | 23 | 20 | 1 | 2 | 1 | 3  |

PZ-51 250 (0.552) Cm (233:256)

1: TOF MS ES+

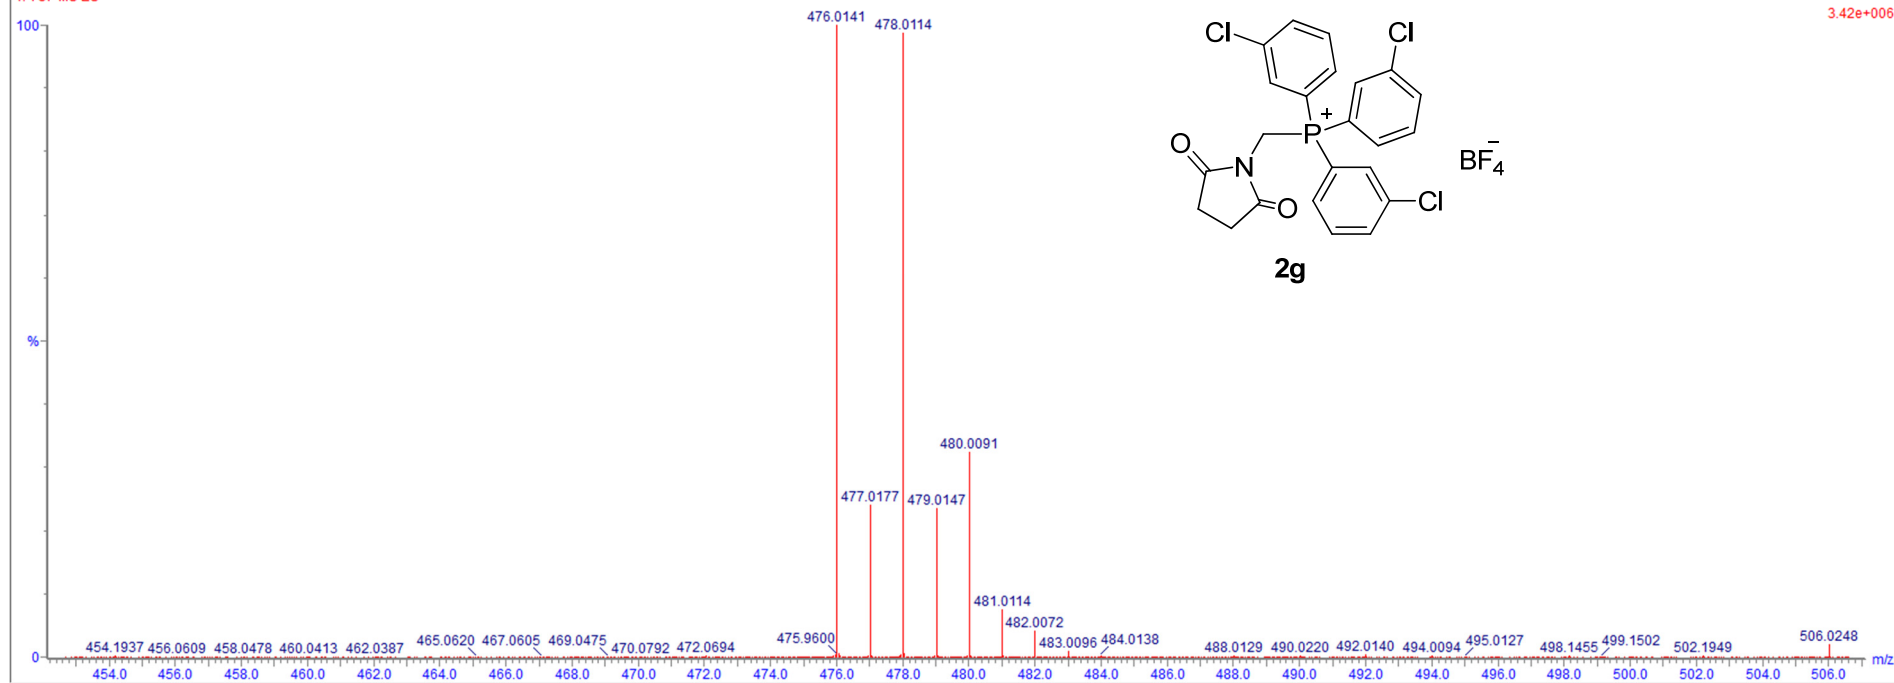

MS spectrum of 1-(N-succinimido)methyltris(3-chlorophenyl)phosphonium tetrafluoroborate (**2g**).



# Multiple Mass Analysis: 2 mass(es) processed

Tolerance = 100.0 mDa / DBE: min = -10.0, max = 50.0

Element prediction: Off

Number of isotope peaks used for i-FIT = 2

Monoisotopic Mass, Even Electron Ions

56 formula(e) evaluated with 22 results within limits (up to 5 closest results for each mass)

Elements Used:

| Mass     | RA     | Calc. Mass | mDa   | PPM   | DBE  | Formula                                                            | i-FIT | i-FIT Norm | Fit Conf % | C  | H  | N | O | P | Cl |
|----------|--------|------------|-------|-------|------|--------------------------------------------------------------------|-------|------------|------------|----|----|---|---|---|----|
| 498.0348 | 100.00 | 498.0348   | 0.0   | 0.0   | 16.5 | C <sub>26</sub> H <sub>20</sub> N O P Cl <sub>3</sub>              | 474.3 | 4.987      | 0.68       | 26 | 20 | 1 | 1 | 1 | 3  |
|          |        | 498.0196   | 15.2  | 30.5  | 12.5 | C <sub>22</sub> H <sub>20</sub> N O <sub>4</sub> P Cl <sub>3</sub> | 472.9 | 3.569      | 2.82       | 22 | 20 | 1 | 4 | 1 | 3  |
|          |        | 498.0559   | -21.1 | -42.4 | 11.5 | C <sub>23</sub> H <sub>24</sub> N O <sub>3</sub> P Cl <sub>3</sub> | 469.3 | 0.056      | 94.54      | 23 | 24 | 1 | 3 | 1 | 3  |
|          |        | 497.9984   | 36.4  | 73.1  | 17.5 | C <sub>25</sub> H <sub>16</sub> N O <sub>2</sub> P Cl <sub>3</sub> | 473.3 | 3.990      | 1.85       | 25 | 16 | 1 | 2 | 1 | 3  |
|          |        | 498.0771   | -42.3 | -84.9 | 6.5  | C <sub>20</sub> H <sub>28</sub> N O <sub>5</sub> P Cl <sub>3</sub> | 476.1 | 6.833      | 0.11       | 20 | 28 | 1 | 5 | 1 | 3  |
| 500.0323 | 98.60  | 500.0352   | -2.9  | -5.8  | 11.5 | C <sub>22</sub> H <sub>22</sub> N O <sub>4</sub> P Cl <sub>3</sub> | 495.6 | 4.018      | 1.80       | 22 | 22 | 1 | 4 | 1 | 3  |
|          |        | 500.0505   | -18.2 | -36.4 | 15.5 | C <sub>26</sub> H <sub>22</sub> N O P Cl <sub>3</sub>              | 497.8 | 6.218      | 0.20       | 26 | 22 | 1 | 1 | 1 | 3  |
|          |        | 500.0141   | 18.2  | 36.4  | 16.5 | C <sub>25</sub> H <sub>18</sub> N O <sub>2</sub> P Cl <sub>3</sub> | 496.2 | 4.785      | 0.84       | 25 | 18 | 1 | 2 | 1 | 3  |

PZ-57 171 (0.382) Cm (150:171)

1: TOF MS ES+

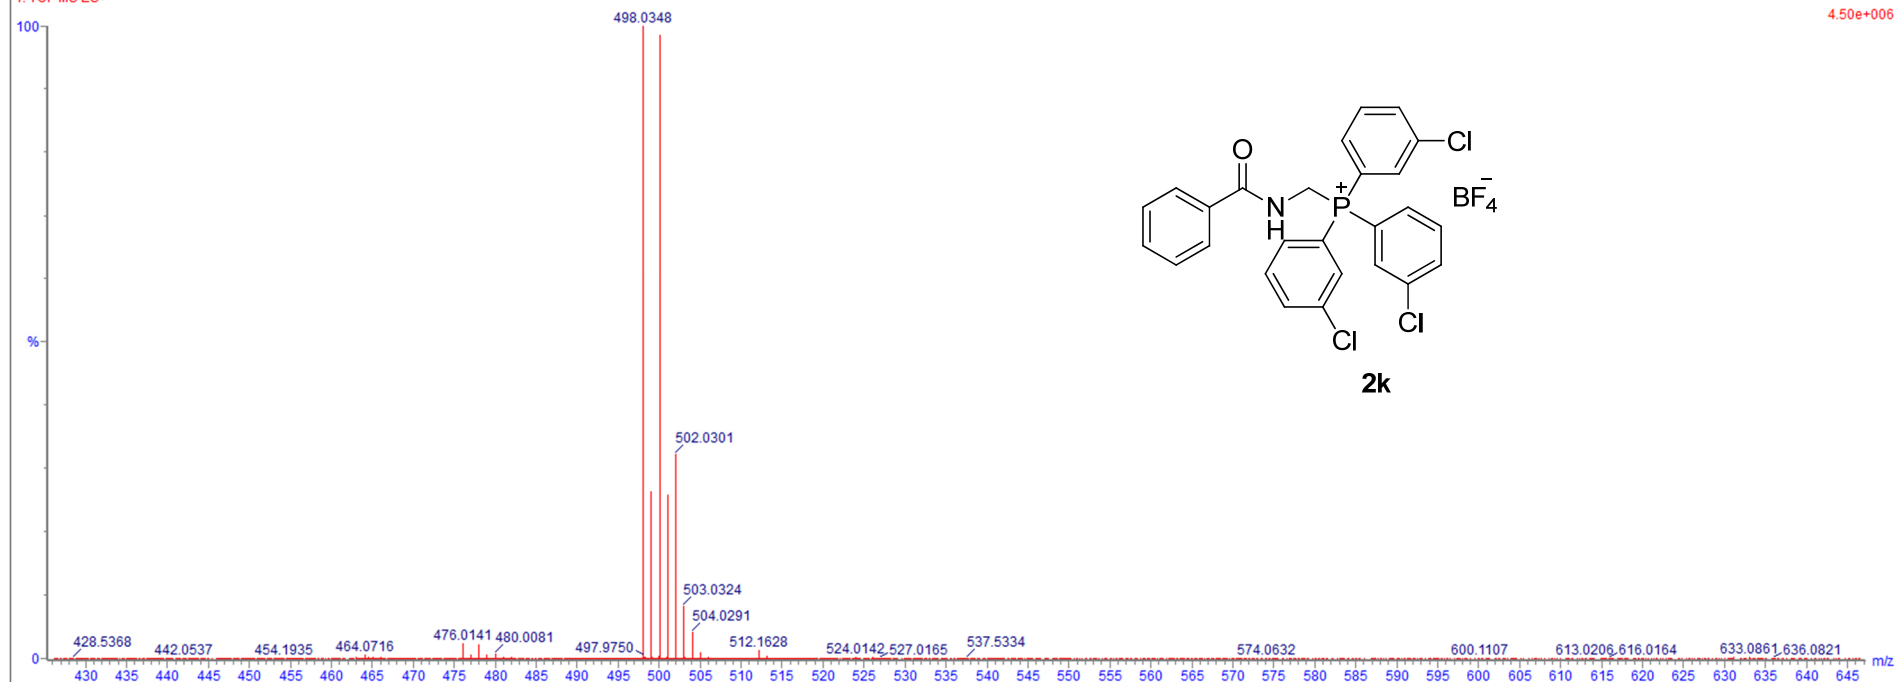

MS spectrum of (*N*-benzoylamino)methyltris(3-chlorophenyl)phosphonium tetrafluoroborate (**2k**).

**Multiple Mass Analysis: 2 mass(es) processed**

Tolerance = 50.0 mDa / DBE: min = -10.0, max = 50.0

Element prediction: Off

Number of isotope peaks used for i-FIT = 2

Monoisotopic Mass, Even Electron Ions

4939 formula(e) evaluated with 403 results within limits (up to 3 closest results for each mass)

Elements Used:

| Mass     | RA     | Calc. Mass | mDa  | PPM  | DBE  | Formula               | i-FIT | i-FIT Norm | Fit Conf % | C  | H  | N | O | Na | P | S | Cl |
|----------|--------|------------|------|------|------|-----------------------|-------|------------|------------|----|----|---|---|----|---|---|----|
| 436.0193 | 100.00 | 436.0192   | 0.1  | 0.2  | 12.5 | C21 H18 N O P Cl3     | 245.1 | 0.028      | 97.21      | 21 | 18 | 1 | 1 |    | 1 |   | 3  |
|          |        | 436.0197   | -0.4 | -0.9 | 27.5 | C30 H7 N Na S         | 250.4 | 5.300      | 0.50       | 30 | 7  | 1 |   | 1  |   | 1 |    |
|          |        | 436.0197   | -0.4 | -0.9 | 21.5 | C25 H11 N O3 P S      | 248.9 | 3.777      | 2.29       | 25 | 11 | 1 | 3 |    | 1 | 1 |    |
| 438.0170 | 97.67  | 438.0171   | -0.1 | -0.2 | 4.5  | C15 H21 N O4 Na P Cl3 | 312.6 | 0.324      | 72.29      | 15 | 21 | 1 | 4 | 1  | 1 |   | 3  |
|          |        | 438.0169   | 0.1  | 0.2  | 21.5 | C25 H9 N O5 Cl        | 313.8 | 1.512      | 22.04      | 25 | 9  | 1 | 5 |    |   |   | 1  |
|          |        | 438.0167   | 0.3  | 0.7  | 27.5 | C29 H5 N O3 Na        | 315.2 | 2.870      | 5.67       | 29 | 5  | 1 | 3 | 1  |   |   |    |

H83-80 192 (0.442)

1: TOF MS ES+

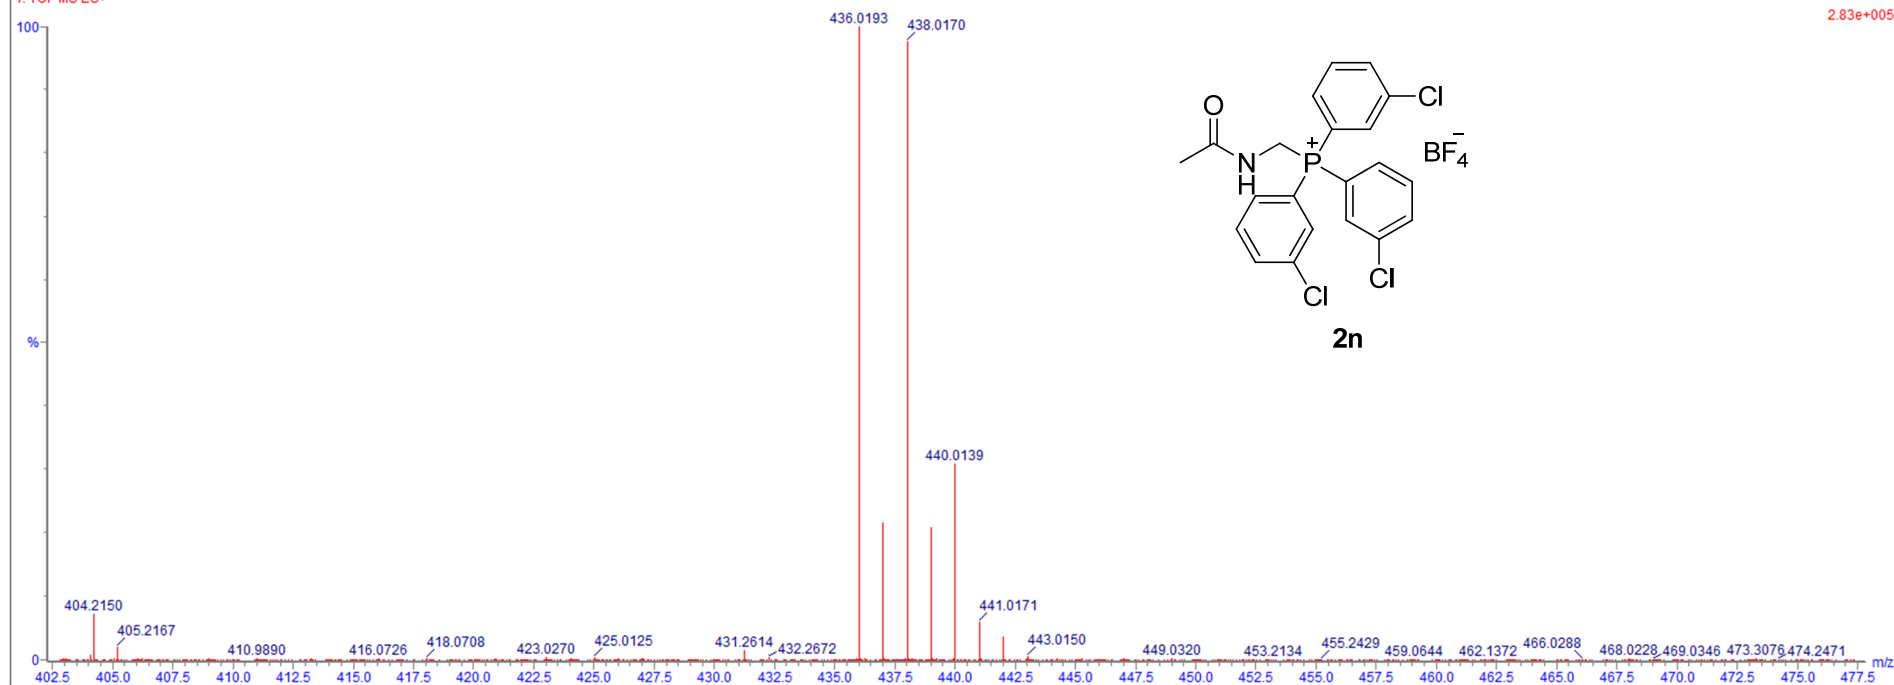

MS spectrum of (N-acetylamino)methyltris(3-chlorophenyl)phosphonium tetrafluoroborate (**2n**).

Tolerance = 50.0 mDa / DBE: min = -10.0, max = 50.0

Element prediction: Off

Number of isotope peaks used for i-FIT = 2

Monoisotopic Mass, Even Electron Ions

524 formula(e) evaluated with 58 results within limits (up to 3 closest results for each mass)

Elements Used:

| Mass     | RA     | Calc. Mass | mDa  | PPM  | DBE  | Formula         | i-FIT | i-FIT Norm | Fit Conf % | C  | H  | N | O | P |
|----------|--------|------------|------|------|------|-----------------|-------|------------|------------|----|----|---|---|---|
| 426.1621 | 100.00 | 426.1623   | -0.2 | -0.5 | 16.5 | C27 H25 N O2 P  | 198.9 | 0.014      | 98.56      | 27 | 25 | 1 | 2 | 1 |
|          |        | 426.1615   | 0.6  | 1.4  | 4.5  | C11 H25 N9 O7 P | 206.0 | 7.084      | 0.08       | 11 | 25 | 9 | 7 | 1 |
|          |        | 426.1641   | -2.0 | -4.7 | 3.5  | C15 H29 N3 O9 P | 203.2 | 4.301      | 1.35       | 15 | 29 | 3 | 9 | 1 |

H-144 240 (0.533)  
1: TOF MS ES+

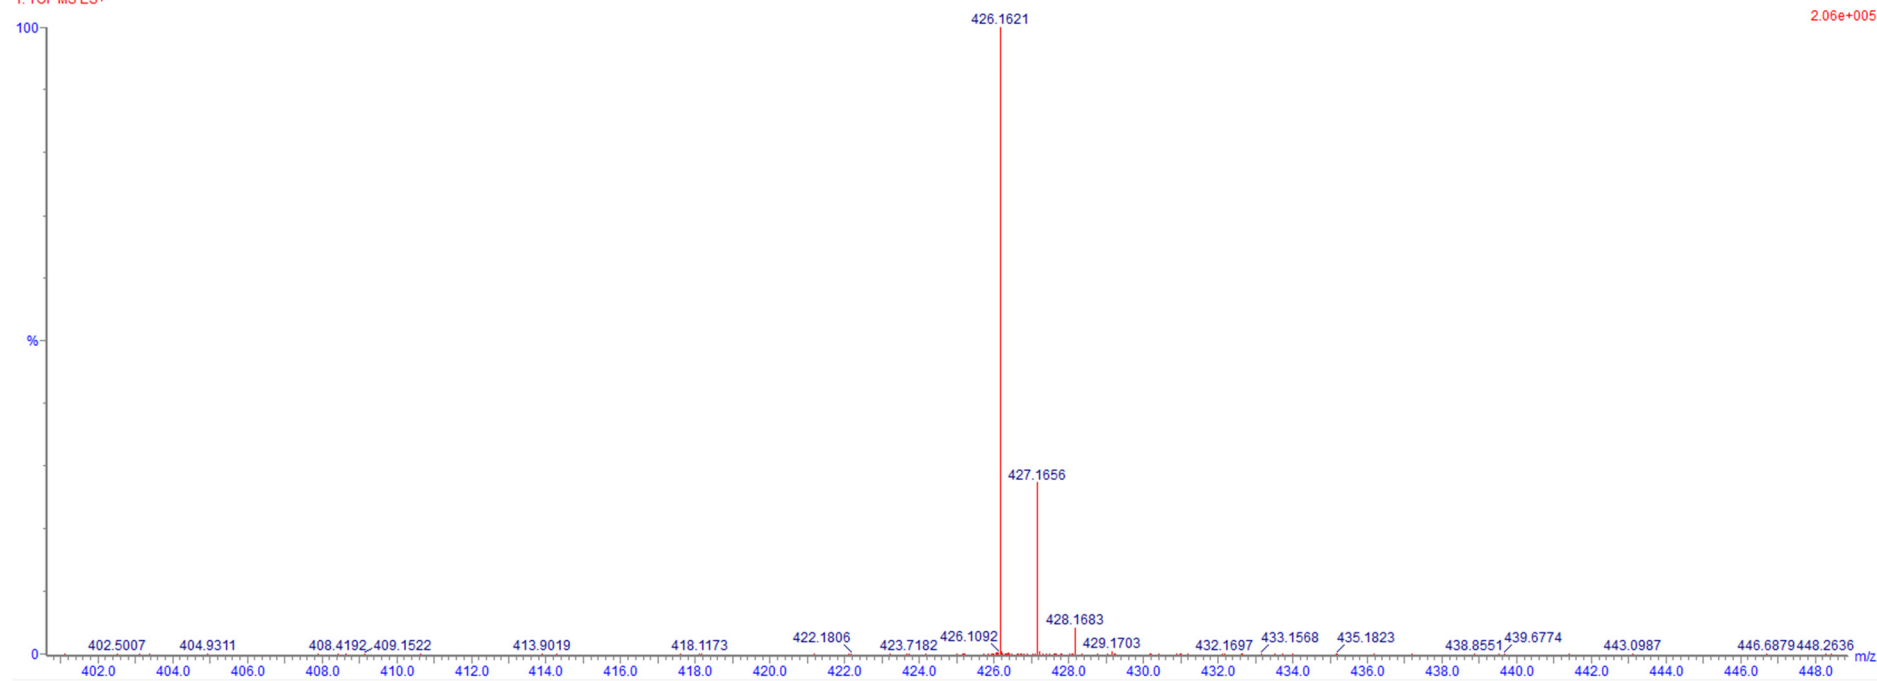

MS spectrum of (N-benzyloxycarbonylamino)methyltriphenylphosphonium tetrafluoroborate (**2o**).

Tolerance = 50.0 mDa / DBE: min = -10.0, max = 50.0

Element prediction: Off

Number of isotope peaks used for i-FIT = 2

Monoisotopic Mass, Even Electron Ions

524 formula(e) evaluated with 58 results within limits (up to 3 closest results for each mass)

Elements Used:

| Mass     | RA     | Calc. Mass | mDa  | PPM  | DBE  | Formula         | i-FIT | i-FIT Norm | Fit Conf % | C  | H  | N | O | P |
|----------|--------|------------|------|------|------|-----------------|-------|------------|------------|----|----|---|---|---|
| 426.1622 | 100.00 | 426.1623   | -0.1 | -0.2 | 16.5 | C27 H25 N O2 P  | 76.3  | 0.000      | 99.97      | 27 | 25 | 1 | 2 | 1 |
|          |        | 426.1615   | 0.7  | 1.6  | 4.5  | C11 H25 N9 O7 P | 86.9  | 10.596     | 0.00       | 11 | 25 | 9 | 7 | 1 |
|          |        | 426.1641   | -1.9 | -4.5 | 3.5  | C15 H29 N3 O9 P | 84.7  | 8.395      | 0.02       | 15 | 29 | 3 | 9 | 1 |

H-130 592 (1.282)  
1: TOF MS ES+

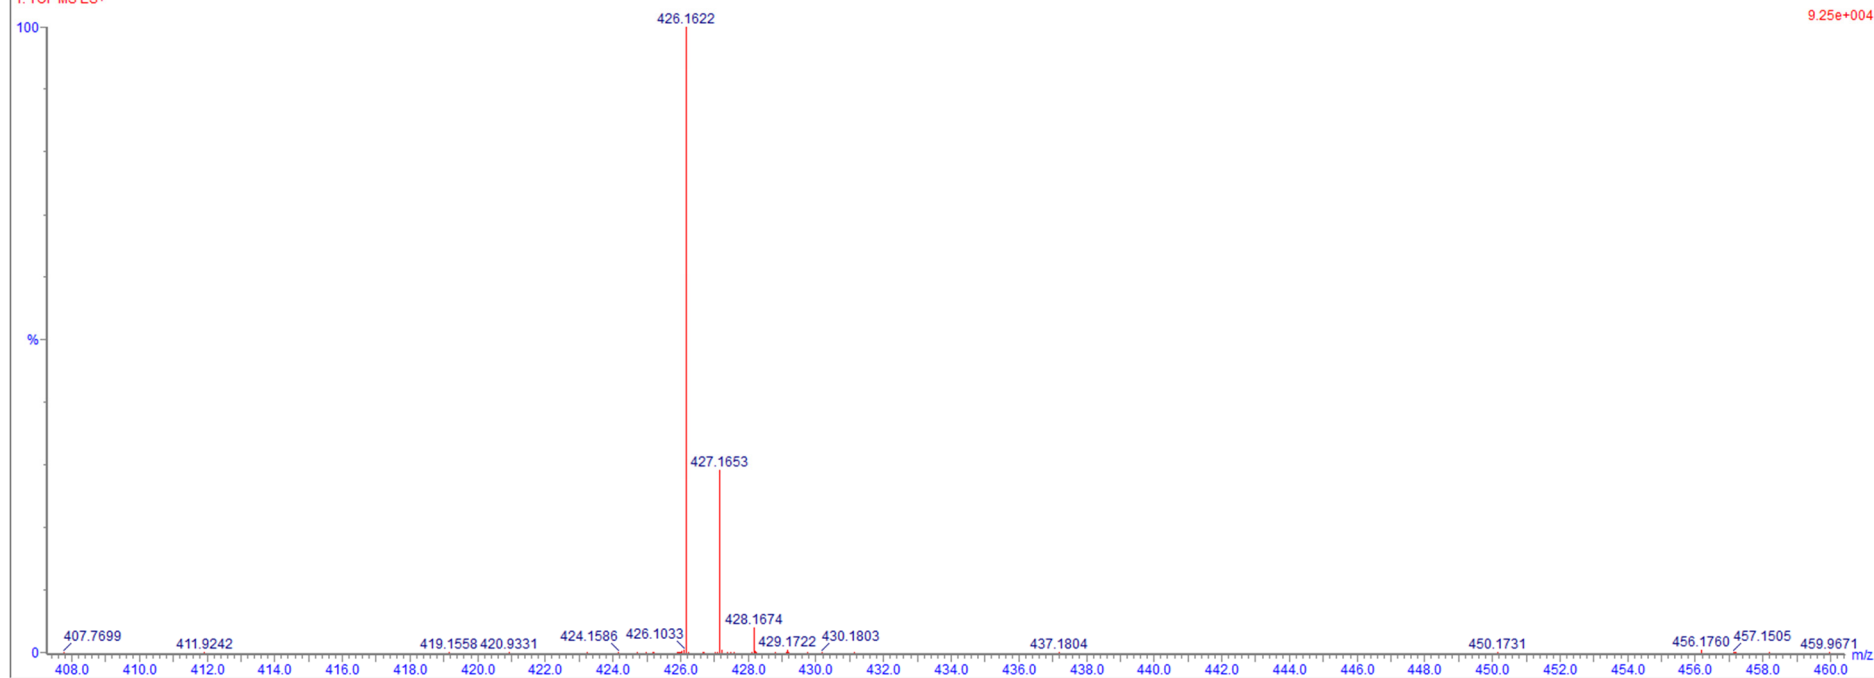

MS spectrum of (N-benzyloxycarbonylamino)methyltriphenylphosphonium bromide (**2p**).

Tolerance = 50.0 mDa / DBE: min = -10.0, max = 50.0

Element prediction: Off

Number of isotope peaks used for i-FIT = 2

Monoisotopic Mass, Even Electron Ions

523 formula(e) evaluated with 59 results within limits (up to 3 closest results for each mass)

Elements Used:

| Mass     | RA     | Calc. Mass | mDa  | PPM  | DBE  | Formula                                                         | i-FIT | i-FIT Norm | Fit Conf % | C  | H  | N | O | P |
|----------|--------|------------|------|------|------|-----------------------------------------------------------------|-------|------------|------------|----|----|---|---|---|
| 392.1790 | 100.00 | 392.1779   | 1.1  | 2.8  | 12.5 | C <sub>24</sub> H <sub>27</sub> N O <sub>2</sub> P              | 419.9 | 0.000      | 99.97      | 24 | 27 | 1 | 2 | 1 |
|          |        | 392.1798   | -0.8 | -2.0 | -0.5 | C <sub>12</sub> H <sub>31</sub> N <sub>3</sub> O <sub>9</sub> P | 428.1 | 8.257      | 0.03       | 12 | 31 | 3 | 9 | 1 |
|          |        | 392.1771   | 1.9  | 4.8  | 0.5  | C <sub>8</sub> H <sub>27</sub> N <sub>9</sub> O <sub>7</sub> P  | 430.0 | 10.174     | 0.00       | 8  | 27 | 9 | 7 | 1 |

H-136 380 (0.839)  
1: TOF MS ES+

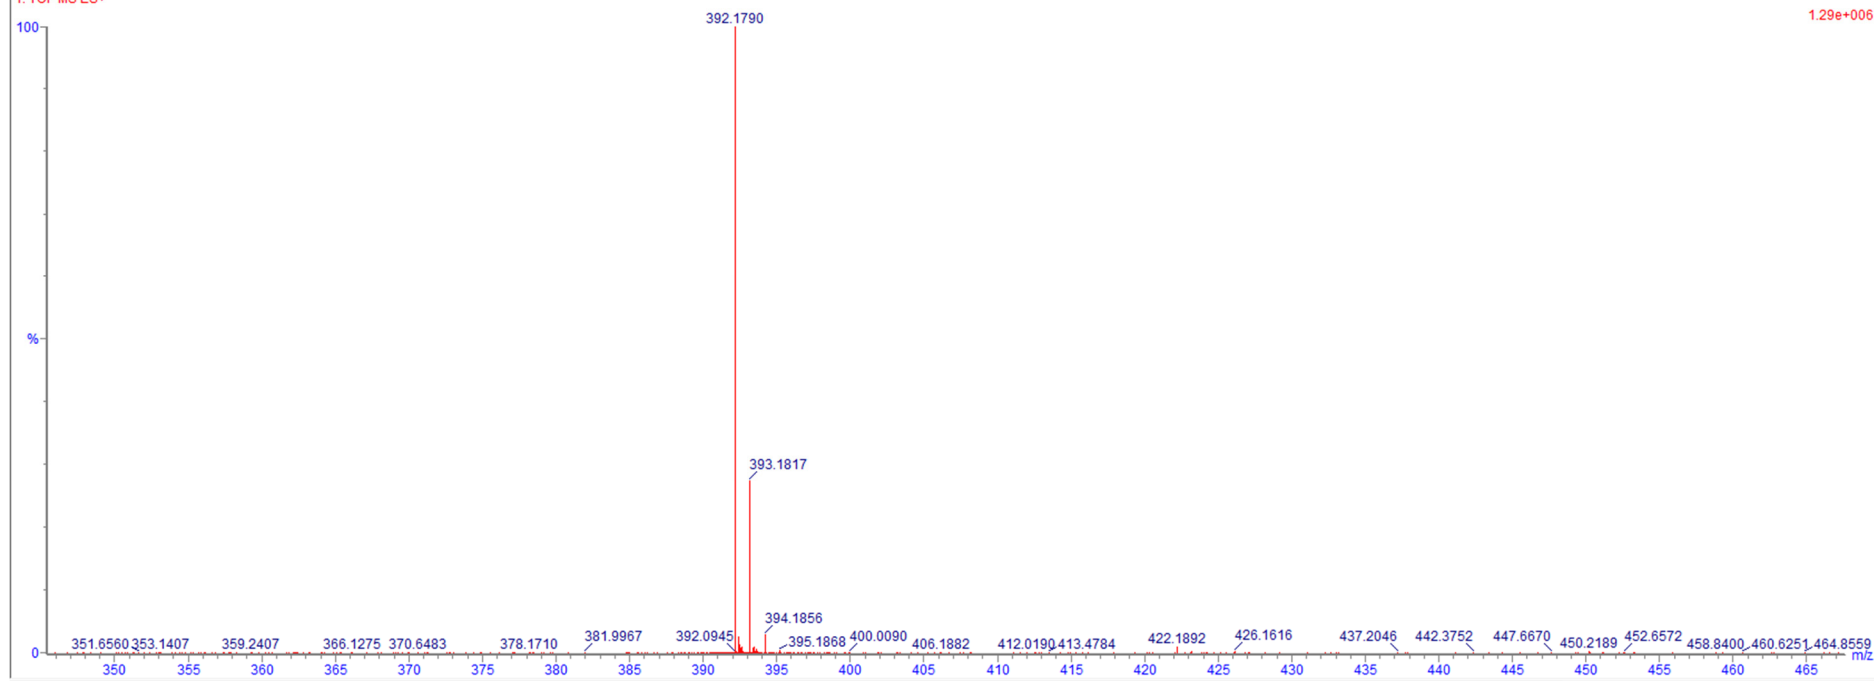

MS spectrum of (N-tert-butoxycarbonylamino)methylphosphonium bromide (2q).

Tolerance = 50.0 mDa / DBE: min = -10.0, max = 50.0

Element prediction: Off

Number of isotope peaks used for i-FIT = 2

Monoisotopic Mass, Even Electron Ions

2407 formula(e) evaluated with 185 results within limits (up to 3 closest results for each mass)

Elements Used:

| Mass     | RA     | Calc. Mass | mDa  | PPM  | DBE  | Formula                                    | i-FIT | i-FIT Norm | Fit Conf % | C  | H  | N | O | Na | P | S | Cl |
|----------|--------|------------|------|------|------|--------------------------------------------|-------|------------|------------|----|----|---|---|----|---|---|----|
| 360.1518 | 100.00 | 360.1517   | 0.1  | 0.3  | 13.5 | C <sub>23</sub> H <sub>23</sub> N O P      | 375.6 | 0.526      | 59.07      | 23 | 23 | 1 | 1 |    | 1 |   |    |
|          |        | 360.1519   | -0.1 | -0.3 | 13.5 | C <sub>24</sub> H <sub>23</sub> N Cl       | 376.8 | 1.732      | 17.69      | 24 | 23 | 1 |   |    |   |   | 1  |
|          |        | 360.1527   | -0.9 | -2.5 | 5.5  | C <sub>18</sub> H <sub>28</sub> N O Na P S | 376.6 | 1.460      | 23.23      | 18 | 28 | 1 | 1 | 1  | 1 | 1 |    |

H68 156 (0.354)

1: TOF MS ES+

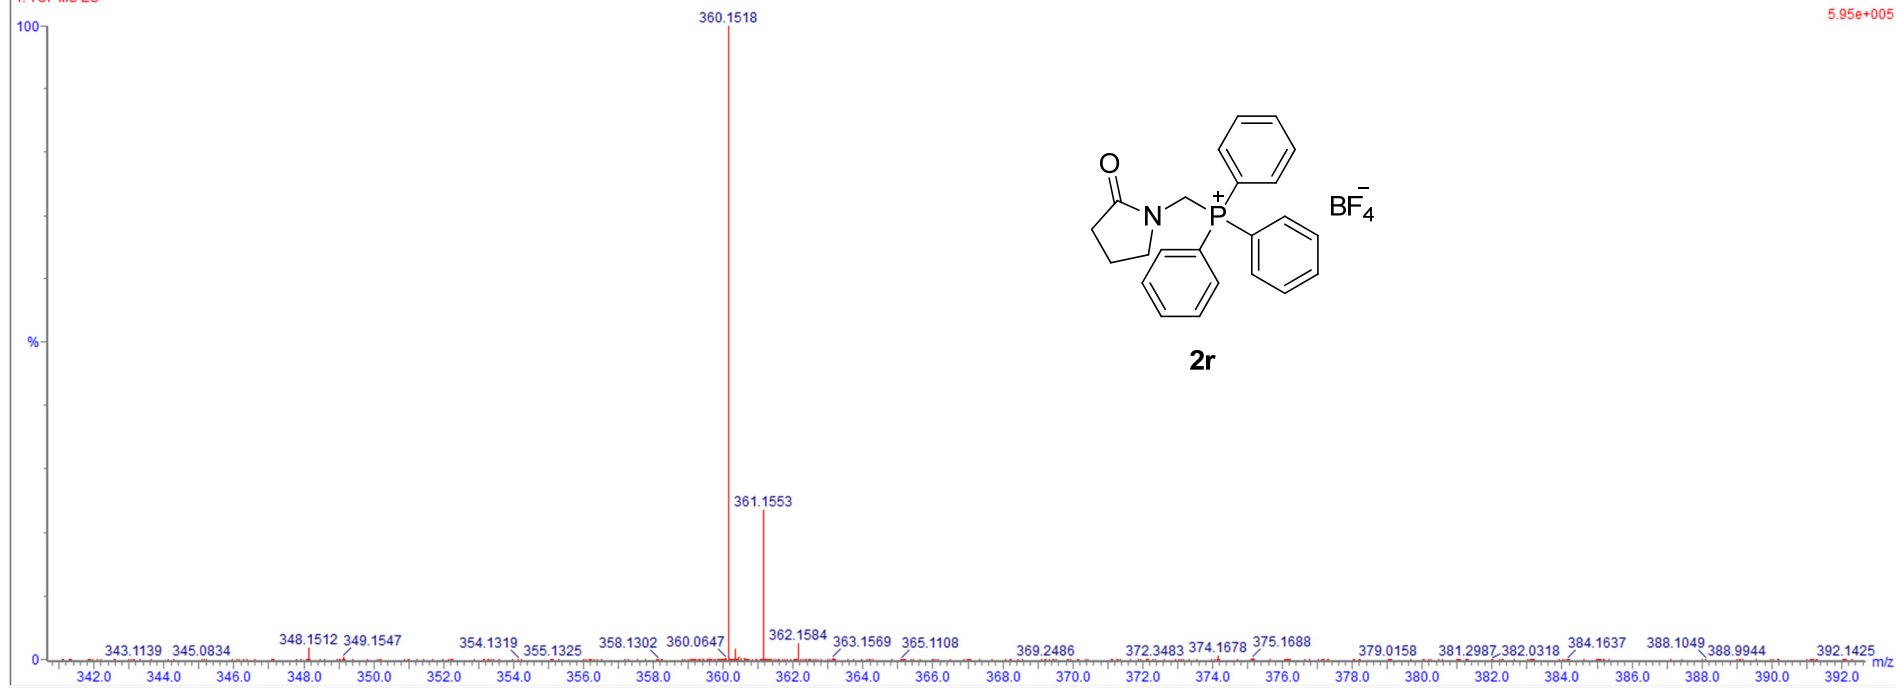

MS spectrum of 1-(2-oxopyrrolidin-1-yl)methyltriphenylphosphonium tetrafluoroborate (**2r**).

Tolerance = 50.0 mDa / DBE: min = -10.0, max = 50.0

Element prediction: Off

Number of isotope peaks used for i-FIT = 2

Monoisotopic Mass, Even Electron Ions

524 formula(e) evaluated with 58 results within limits (up to 3 closest results for each mass)

Elements Used:

| Mass     | RA     | Calc. Mass | mDa  | PPM  | DBE  | Formula                                                         | i-FIT | i-FIT Norm | Fit Conf % | C  | H  | N | O | P |
|----------|--------|------------|------|------|------|-----------------------------------------------------------------|-------|------------|------------|----|----|---|---|---|
| 450.1834 | 100.00 | 450.1834   | 0.0  | 0.0  | 13.5 | C <sub>26</sub> H <sub>29</sub> N O <sub>4</sub> P              | 331.6 | 0.042      | 95.91      | 26 | 29 | 1 | 4 | 1 |
|          |        | 450.1848   | -1.4 | -3.1 | 18.5 | C <sub>27</sub> H <sub>25</sub> N <sub>5</sub> P                | 334.8 | 3.199      | 4.08       | 27 | 25 | 5 |   | 1 |
|          |        | 450.1826   | 0.8  | 1.8  | 1.5  | C <sub>10</sub> H <sub>29</sub> N <sub>9</sub> O <sub>9</sub> P | 340.8 | 9.247      | 0.01       | 10 | 29 | 9 | 9 | 1 |

H-143 363 (0.807)

1: TOF MS ES+

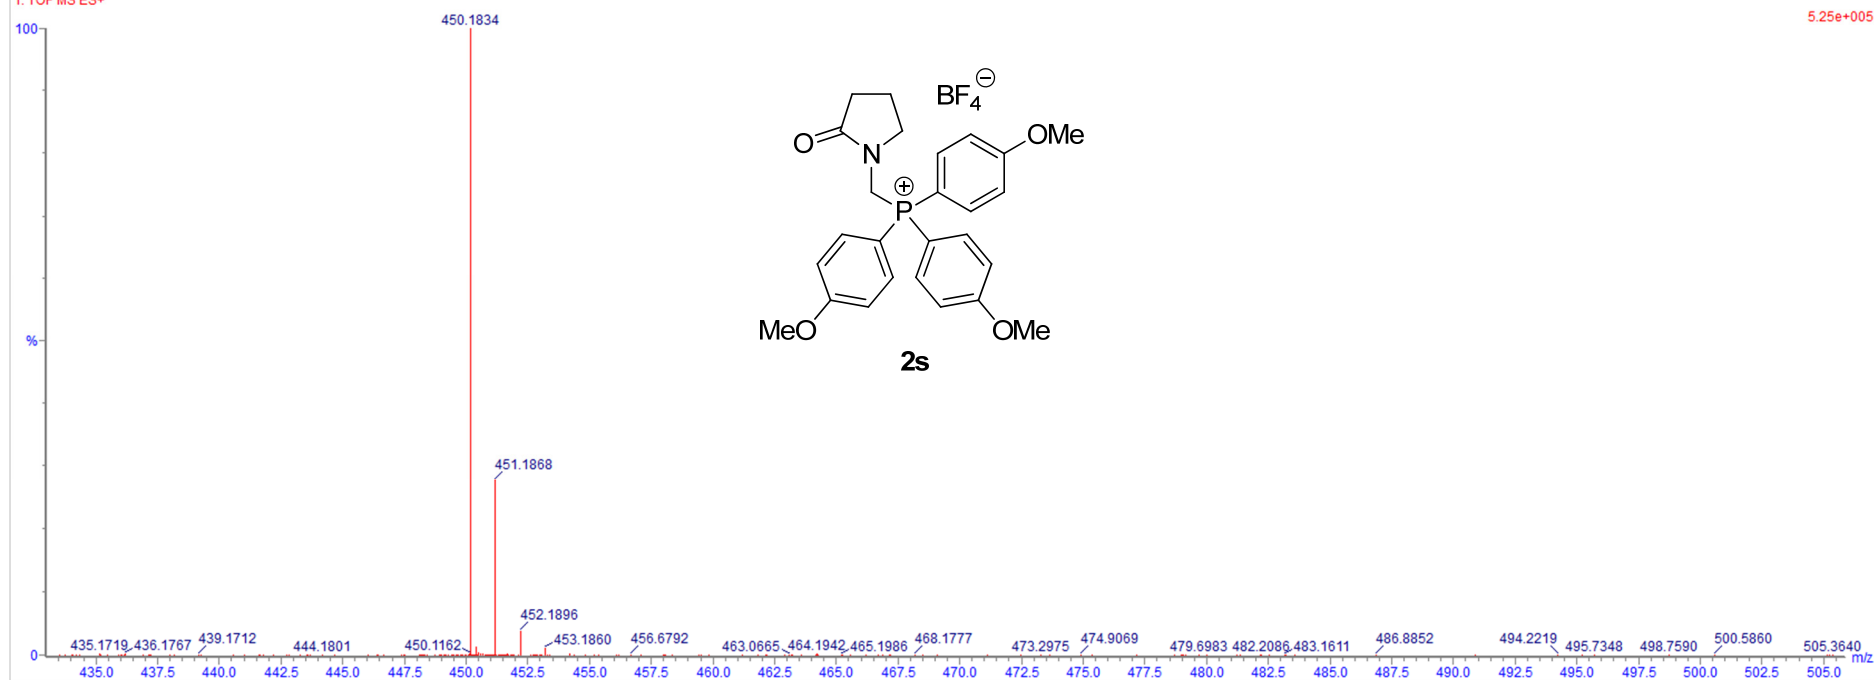

MS spectrum of 2-oxopyrrolidin-1-yl)methyltris(4-methoxyphenyl)phosphonium tetrafluoroborate (**2s**).
